# Supplementary material for: Advanced feature selection to study the internationalization strategy of enterprises
Source: PeerJ Comput Sci. 2021 Mar 25;7:e403. doi: 10.7717/peerj-cs.403 (PMC8022633; doi:10.7717/peerj-cs.403)
Supplement: Supplemental Information 1 — Raw data. [file peerj-cs-07-403-s001.xls]

## Sheet: Hoja1
Company	Country	ID company	Presence	1. Vicarious Experience	2. Vicarious Experience Same Sector	3. Vicarious Experience Different Sector	4. Manufacturing	5. Food	6. Construction	7. Regulated	8. Financial	9. Geographic Distance (Log)	10. Psychic Distance - Education	11. Psychic Distance - Industrial Development	12. Psychic Distance - Language	13. Psychic Distance – Democracy	14. Psychic Distance - Social System	15. Psychic Distance - Religion	16. Unemployment	17. FDI/GDP	18. GDP Growth	19. Population (Log)	20. Employees	21. ROE	22. Stock Market	23. Related Diversification	24. Unrelated Diversification	25. Number of Countries
ABERTIS INFRAESTRUCTURAS S.A.	Germany	1	0	56	6	50	0	0	1	0	0	3.21148	0.536164	0.562607	0.26461	0.0541978	0.666667	-1.29153	11.1	1.16865	0.96	7.91629	3.63214	15.9335	1	0	1	15
ABERTIS INFRAESTRUCTURAS S.A.	Argentina	1	1	61	8	53	0	0	1	0	0	4.00345	1.28036	0.249754	-3.86767	0.279269	0.666667	-1.55102	10.6	2.54485	9.18	7.58824	3.63214	15.9335	1	0	1	15
ABERTIS INFRAESTRUCTURAS S.A.	Australia	1	0	18	4	14	0	0	1	0	0	4.23231	0.567562	0.721527	0.26461	0.165512	0	-1.29153	5	-4.71452	2.8	7.30812	3.63214	15.9335	1	0	1	15
ABERTIS INFRAESTRUCTURAS S.A.	Austria	1	0	13	0	13	0	0	1	0	0	3.23123	0.588788	0.518591	0.26461	0.0931028	0.333333	-1.55102	5.2	2.91401	1.8	6.91557	3.63214	15.9335	1	0	1	15
ABERTIS INFRAESTRUCTURAS S.A.	Bangladesh	1	0	2	0	2	0	0	1	0	0	3.93561	2.63734	1.3076	0.26461	0.590559	0.333333	1.27716	4.3	1.15269	5.96	8.15174	3.63214	15.9335	1	0	1	15
ABERTIS INFRAESTRUCTURAS S.A.	Belgium	1	0	38	4	34	0	0	1	0	0	3.13244	0.777357	0.634216	-0.25827	0.130961	0.666667	-1.29153	8.4	6.38874	1.25	7.02031	3.63214	15.9335	1	0	1	15
ABERTIS INFRAESTRUCTURAS S.A.	Brasil	1	0	53	6	47	0	0	1	0	0	3.89327	1.91931	0.602092	-0.25827	0.406583	0.25	-1.55102	9.3	1.70724	2.94	8.27046	3.63214	15.9335	1	0	1	15
ABERTIS INFRAESTRUCTURAS S.A.	Bulgaria	1	0	13	5	8	0	0	1	0	0	3.36942	1.12444	0.190378	0.26461	0.191694	0.5	-0.790003	10.1	8.1765	6.25	6.88874	3.63214	15.9335	1	0	1	15
ABERTIS INFRAESTRUCTURAS S.A.	Canada	1	0	23	3	20	0	0	1	0	0	3.81425	0.103029	0.79255	-0.25827	0.161496	0.166667	-1.29153	6.7	3.0366	2.9	7.50919	3.63214	15.9335	1	0	1	15
ABERTIS INFRAESTRUCTURAS S.A.	Chile	1	1	49	8	41	0	0	1	0	0	4.03132	1.48778	0.490568	-3.86767	0.146208	0.416667	-1.55102	8	5.60687	5.71	7.21206	3.63214	15.9335	1	0	1	15
ABERTIS INFRAESTRUCTURAS S.A.	China	1	0	44	4	40	0	0	1	0	0	3.98191	1.90078	1.11489	0.52605	1.8939	0.333333	1.26844	4.2	3.22686	10.2	9.11544	3.63214	15.9335	1	0	1	15
ABERTIS INFRAESTRUCTURAS S.A.	Colombia	1	1	33	3	30	0	0	1	0	0	3.90663	1.54759	0.748636	-3.86767	0.629637	0.166667	-1.55102	12	8.29023	4.72	7.65269	3.63214	15.9335	1	0	1	15
ABERTIS INFRAESTRUCTURAS S.A.	South Korea	1	0	10	0	10	0	0	1	0	0	4.00439	0.420141	0.172921	0.52605	0.19628	0.541667	-0.271032	3.7	0.900652	4.2	7.68389	3.63214	15.9335	1	0	1	15
ABERTIS INFRAESTRUCTURAS S.A.	Costa Rica	1	1	15	1	14	0	0	1	0	0	3.93278	1.54875	0.662422	-3.86767	0.00206424	0	-1.55102	6.6	3.26941	5.91	6.63621	3.63214	15.9335	1	0	1	15
ABERTIS INFRAESTRUCTURAS S.A.	Croacia	1	0	8	2	6	0	0	1	0	0	3.22565	1.27885	0.253946	0.26461	1.01215	0.666667	-1.55102	12.6	4.3578	4.28	6.64771	3.63214	15.9335	1	0	1	15
ABERTIS INFRAESTRUCTURAS S.A.	Denmark	1	0	10	0	10	0	0	1	0	0	3.31418	0.590138	0.733766	0.26461	0.112828	0.166667	-1.04949	4.8	2.05207	3.05	6.73368	3.63214	15.9335	1	0	1	15
ABERTIS INFRAESTRUCTURAS S.A.	Ecuador	1	0	18	2	16	0	0	1	0	0	3.95347	1.61213	0.825643	-3.38939	0.280888	0.133333	-1.55102	7.7	5.24269	4.74	7.12151	3.63214	15.9335	1	0	1	15
ABERTIS INFRAESTRUCTURAS S.A.	El Salvador	1	0	12	2	10	0	0	1	0	0	3.94102	2.12139	0.718083	-3.86767	0.459103	0.666667	-1.55102	7.2	3.05173	2.75	6.83765	3.63214	15.9335	1	0	1	15
ABERTIS INFRAESTRUCTURAS S.A.	Slovakia	1	0	13	1	12	0	0	1	0	0	3.29809	0.931708	0.0511288	0.26461	0.296655	0.333333	-1.29153	16.2	4.02343	6.04	6.73135	3.63214	15.9335	1	0	1	15
ABERTIS INFRAESTRUCTURAS S.A.	Slovenia	1	0	6	1	5	0	0	1	0	0	3.20355	0.40353	0.182051	0.26461	0.101477	0.333333	-1.29153	6.5	1.4438	4.03	6.30114	3.63214	15.9335	1	0	1	15
ABERTIS INFRAESTRUCTURAS S.A.	USA	1	1	74	7	67	0	0	1	0	0	3.87141	0.553655	1.26073	-0.69195	0.15745	0.166667	-1.29153	5.1	0.800894	3.2	8.47189	3.63214	15.9335	1	0	1	15
ABERTIS INFRAESTRUCTURAS S.A.	Estonia	1	0	3	0	3	0	0	1	0	0	3.46571	0.927963	0.110104	0.26461	0.20986	0.666667	-0.530518	7.9	20.7518	10.47	6.12908	3.63214	15.9335	1	0	1	15
ABERTIS INFRAESTRUCTURAS S.A.	Ethiopia	1	0	2	2	0	0	0	1	0	0	3.72911	2.78128	1.3431	0.26461	1.26883	0.333333	-0.530518	5.4	1.80247	10.2	7.85282	3.63214	15.9335	1	0	1	15
ABERTIS INFRAESTRUCTURAS S.A.	Philippine	1	0	12	1	11	0	0	1	0	0	4.07154	1.53391	0.995918	0.26461	0.359399	0.208333	-1.55102	7.7	1.1508	4.97	7.91936	3.63214	15.9335	1	0	1	15
ABERTIS INFRAESTRUCTURAS S.A.	Finland	1	0	9	0	9	0	0	1	0	0	3.48105	0.507403	0.679478	0.52605	0.114138	0.0833333	-1.04949	8.4	2.36125	2.09	6.71984	3.63214	15.9335	1	0	1	15
ABERTIS INFRAESTRUCTURAS S.A.	France	1	1	80	10	70	0	0	1	0	0	2.98175	0.490732	0.583416	-0.25827	0.0417816	0.333333	-1.29153	8.9	2.98952	1.19	7.78442	3.63214	15.9335	1	0	1	15
ABERTIS INFRAESTRUCTURAS S.A.	Greece	1	0	20	3	17	0	0	1	0	0	3.35976	0.538884	0.215795	0.26461	0.101199	0.166667	-1.04949	9.8	0.269531	3.66	7.04548	3.63214	15.9335	1	0	1	15
ABERTIS INFRAESTRUCTURAS S.A.	The Netherlands	1	0	23	1	22	0	0	1	0	0	3.17633	0.566689	0.663452	0.26461	0.0980731	0	-1.29153	4.7	6.98972	1.13	7.21272	3.63214	15.9335	1	0	1	15
ABERTIS INFRAESTRUCTURAS S.A.	Hungary	1	0	20	2	18	0	0	1	0	0	3.29217	1.2511	0.147629	0.52605	0.00651064	0	-1.29153	7.2	6.0699	4.25	7.00376	3.63214	15.9335	1	0	1	15
ABERTIS INFRAESTRUCTURAS S.A.	India	1	0	18	3	15	0	0	1	0	0	3.88339	2.24326	1.22135	0.26461	0.405146	0.333333	1.26844	4.4	0.818883	9.23	9.03925	3.63214	15.9335	1	0	1	15
ABERTIS INFRAESTRUCTURAS S.A.	Ireland	1	0	19	5	14	0	0	1	0	0	3.18256	0.764228	0.019023	0.26461	0.0741923	0.666667	-1.55102	4.3	-11.284	5.5	6.619	3.63214	15.9335	1	0	1	15
ABERTIS INFRAESTRUCTURAS S.A.	Iceland	1	0	2	0	2	0	0	1	0	0	3.47432	0.957051	0.692716	0.26461	0.110148	0.666667	-1.04949	2.6	14.7276	5.53	5.47239	3.63214	15.9335	1	0	1	15
ABERTIS INFRAESTRUCTURAS S.A.	Israel	1	0	9	1	8	0	0	1	0	0	3.54353	1.46344	0.103381	-0.21367	0.110461	0	1.01767	9	4.52632	5.17	6.84033	3.63214	15.9335	1	0	1	15
ABERTIS INFRAESTRUCTURAS S.A.	Italy	1	1	65	7	58	0	0	1	0	0	3.12249	0.419623	0.297329	-0.25827	0.00573603	0.25	-1.29153	7.7	1.13309	-3.56	7.76795	3.63214	15.9335	1	0	1	15
ABERTIS INFRAESTRUCTURAS S.A.	Japan	1	0	15	0	15	0	0	1	0	0	4.02876	0.661939	0.887715	0.52605	0.0207448	0.416667	1.26844	4.4	0.0612047	2.6	8.10644	3.63214	15.9335	1	0	1	15
ABERTIS INFRAESTRUCTURAS S.A.	Latvia	1	0	3	0	3	0	0	1	0	0	3.43418	0.923385	0.149979	0.26461	0.312954	0.416667	-1.03204	8.9	3.9397	10.6	6.36182	3.63214	15.9335	1	0	1	15
ABERTIS INFRAESTRUCTURAS S.A.	Lithuania	1	0	2	0	2	0	0	1	0	0	3.41598	0.941538	0.270507	0.26461	0.206518	0.25	-1.29153	8.3	3.93337	7.56	6.5333	3.63214	15.9335	1	0	1	15
ABERTIS INFRAESTRUCTURAS S.A.	Luxembourg	1	0	8	0	8	0	0	1	0	0	3.11354	1.69208	0.929135	-0.25827	0.11085	0.166667	-1.55102	4.5	10.1045	4.03	5.65964	3.63214	15.9335	1	0	1	15
ABERTIS INFRAESTRUCTURAS S.A.	Malta	1	0	3	0	3	0	0	1	0	0	3.20679	1.13972	0.366184	0.52605	0.130339	0.333333	-1.55102	7.3	10.5646	2.49	5.60584	3.63214	15.9335	1	0	1	15
ABERTIS INFRAESTRUCTURAS S.A.	Morocco	1	1	40	7	33	0	0	1	0	0	2.94765	2.40856	0.965929	0.52605	1.13327	0.166667	1.27716	11	5.6818	1.72	7.47918	3.63214	15.9335	1	0	1	15
ABERTIS INFRAESTRUCTURAS S.A.	Mexico	1	0	68	6	62	0	0	1	0	0	3.96116	1.61593	0.61242	-3.86767	0.803904	0.333333	-1.55102	3.5	2.35186	2.8	8.01321	3.63214	15.9335	1	0	1	15
ABERTIS INFRAESTRUCTURAS S.A.	Nigeria	1	0	2	0	2	0	0	1	0	0	3.5664	2.38172	1.08093	0.26461	1.74765	0.666667	-0.530518	5.6	3.50758	6.1	8.15031	3.63214	15.9335	1	0	1	15
ABERTIS INFRAESTRUCTURAS S.A.	Norway	1	0	10	1	9	0	0	1	0	0	3.39007	0.558513	0.773884	0.26461	0.110833	0.166667	-1.04949	4.6	1.15494	2.26	6.66495	3.63214	15.9335	1	0	1	15
ABERTIS INFRAESTRUCTURAS S.A.	New Zealand	1	0	2	0	2	0	0	1	0	0	4.2904	0.485975	0.553697	0.26461	0.0975475	0.666667	-0.790003	3.8	1.46672	1.9	6.61267	3.63214	15.9335	1	0	1	15
ABERTIS INFRAESTRUCTURAS S.A.	Panama	1	0	24	4	20	0	0	1	0	0	3.91924	1.43673	0.720964	-3.38939	0.445543	0.666667	-1.29153	9.8	4.37245	6.91	6.5094	3.63214	15.9335	1	0	1	15
ABERTIS INFRAESTRUCTURAS S.A.	Peru	1	0	33	3	30	0	0	1	0	0	3.97657	1.42631	0.798443	-3.38939	0.983327	0.666667	-1.55102	5.2	3.2493	6.45	7.44667	3.63214	15.9335	1	0	1	15
ABERTIS INFRAESTRUCTURAS S.A.	Poland	1	0	53	10	43	0	0	1	0	0	3.33558	1.19959	0.38872	0.26461	0.0799061	0.25	-1.29153	17.7	2.54782	3.55	7.58167	3.63214	15.9335	1	0	1	15
ABERTIS INFRAESTRUCTURAS S.A.	Portugal	1	1	102	13	89	0	0	1	0	0	2.8324	0.769779	0.315828	-0.25827	0.0980653	0.166667	-1.29153	7.6	1.69826	0.37	7.02323	3.63214	15.9335	1	0	1	15
ABERTIS INFRAESTRUCTURAS S.A.	UK	1	1	68	9	59	0	0	1	0	0	3.15698	0.805554	0.679132	0.26461	0.00306242	0.5	-0.790003	4.7	7.47323	1.82	7.77979	3.63214	15.9335	1	0	1	15
ABERTIS INFRAESTRUCTURAS S.A.	Czech Republic	1	0	28	2	26	0	0	1	0	0	3.26204	0.685613	0.00167352	0.26461	0.00949857	0.666667	-1.03204	7.9	8.86508	6.08	7.01005	3.63214	15.9335	1	0	1	15
ABERTIS INFRAESTRUCTURAS S.A.	Romania	1	0	20	5	15	0	0	1	0	0	3.37913	1.01845	0.52496	-0.25827	0.348609	0.5	-0.790003	7.2	6.46266	4.1	7.33514	3.63214	15.9335	1	0	1	15
ABERTIS INFRAESTRUCTURAS S.A.	Rusia	1	0	24	0	24	0	0	1	0	0	3.62123	0.696054	0.111071	0.26461	0.792843	0.666667	-0.790003	7.1	1.90974	6.4	8.15568	3.63214	15.9335	1	0	1	15
ABERTIS INFRAESTRUCTURAS S.A.	Serbia	1	0	7	2	5	0	0	1	0	0	3.30011	1.33787	0.652569	0.26461	1.71416	0.333333	-0.790003	20.8	5.64939	4.68	6.90656	3.63214	15.9335	1	0	1	15
ABERTIS INFRAESTRUCTURAS S.A.	Singapur	1	0	13	0	13	0	0	1	0	0	4.05448	1.4349	0.479333	0.26461	1.00484	0.666667	1.00895	4.1	17.2101	6.62	6.63767	3.63214	15.9335	1	0	1	15
ABERTIS INFRAESTRUCTURAS S.A.	South Africa	1	1	14	2	12	0	0	1	0	0	3.91822	1.72008	0.6954	0.26461	0.167296	0	-0.790003	23.8	2.63118	5.1	7.67106	3.63214	15.9335	1	0	1	15
ABERTIS INFRAESTRUCTURAS S.A.	Sweden	1	1	15	3	12	0	0	1	0	0	3.3956	0.90496	0.81257	0.26461	0.108496	0	-0.790003	7.7	3.74326	2.7	6.9554	3.63214	15.9335	1	0	1	15
ABERTIS INFRAESTRUCTURAS S.A.	Switzerland	1	0	18	2	16	0	0	1	0	0	3.91415	0.836495	0.694867	-0.21367	0.150978	0.166667	-1.55102	4.4	1.57889	1.9	6.8714	3.63214	15.9335	1	0	1	15
ABERTIS INFRAESTRUCTURAS S.A.	Thailand	1	0	14	0	14	0	0	1	0	0	4.00637	1.44759	1.08846	0.52605	0.353899	0.666667	1.26844	1.3	2.09225	4.49	7.80776	3.63214	15.9335	1	0	1	15
ABERTIS INFRAESTRUCTURAS S.A.	Turquia	1	0	18	2	16	0	0	1	0	0	3.47222	1.60088	0.7561	0.52605	0.628774	0.666667	1.27716	10.6	2.66423	7.38	7.85772	3.63214	15.9335	1	0	1	15
ABERTIS INFRAESTRUCTURAS S.A.	Uruguay	1	0	23	1	22	0	0	1	0	0	3.99607	1.1487	0.233146	-3.86767	0.14597	0.666667	-1.29153	12.2	3.61146	6.56	6.51927	3.63214	15.9335	1	0	1	15
ABERTIS INFRAESTRUCTURAS S.A.	Venezuela	1	0	31	4	27	0	0	1	0	0	3.8557	1.76796	0.336214	-3.86767	0.309872	0.166667	-1.55102	11.4	2.04181	10.33	7.42451	3.63214	15.9335	1	0	1	15
AC HOTELES S.A.	Germany	2	0	56	9	47	0	0	0	0	0	3.21148	0.536164	0.562607	0.26461	0.0541978	0.666667	-1.29153	11.1	1.16865	0.96	7.91629	3.16658	-1.28795	0	0	0	2
AC HOTELES S.A.	Argentina	2	0	61	18	43	0	0	0	0	0	4.00345	1.28036	0.249754	-3.86767	0.279269	0.666667	-1.55102	10.6	2.54485	9.18	7.58824	3.16658	-1.28795	0	0	0	2
AC HOTELES S.A.	Australia	2	0	18	0	18	0	0	0	0	0	4.23231	0.567562	0.721527	0.26461	0.165512	0	-1.29153	5	-4.71452	2.8	7.30812	3.16658	-1.28795	0	0	0	2
AC HOTELES S.A.	Austria	2	0	13	3	10	0	0	0	0	0	3.23123	0.588788	0.518591	0.26461	0.0931028	0.333333	-1.55102	5.2	2.91401	1.8	6.91557	3.16658	-1.28795	0	0	0	2
AC HOTELES S.A.	Bangladesh	2	0	2	1	1	0	0	0	0	0	3.93561	2.63734	1.3076	0.26461	0.590559	0.333333	1.27716	4.3	1.15269	5.96	8.15174	3.16658	-1.28795	0	0	0	2
AC HOTELES S.A.	Belgium	2	0	38	12	26	0	0	0	0	0	3.13244	0.777357	0.634216	-0.25827	0.130961	0.666667	-1.29153	8.4	6.38874	1.25	7.02031	3.16658	-1.28795	0	0	0	2
AC HOTELES S.A.	Brasil	2	0	53	11	42	0	0	0	0	0	3.89327	1.91931	0.602092	-0.25827	0.406583	0.25	-1.55102	9.3	1.70724	2.94	8.27046	3.16658	-1.28795	0	0	0	2
AC HOTELES S.A.	Bulgaria	2	0	13	2	11	0	0	0	0	0	3.36942	1.12444	0.190378	0.26461	0.191694	0.5	-0.790003	10.1	8.1765	6.25	6.88874	3.16658	-1.28795	0	0	0	2
AC HOTELES S.A.	Canada	2	0	23	2	21	0	0	0	0	0	3.81425	0.103029	0.79255	-0.25827	0.161496	0.166667	-1.29153	6.7	3.0366	2.9	7.50919	3.16658	-1.28795	0	0	0	2
AC HOTELES S.A.	Chile	2	0	49	12	37	0	0	0	0	0	4.03132	1.48778	0.490568	-3.86767	0.146208	0.416667	-1.55102	8	5.60687	5.71	7.21206	3.16658	-1.28795	0	0	0	2
AC HOTELES S.A.	China	2	0	44	6	38	0	0	0	0	0	3.98191	1.90078	1.11489	0.52605	1.8939	0.333333	1.26844	4.2	3.22686	10.2	9.11544	3.16658	-1.28795	0	0	0	2
AC HOTELES S.A.	Colombia	2	0	33	12	21	0	0	0	0	0	3.90663	1.54759	0.748636	-3.86767	0.629637	0.166667	-1.55102	12	8.29023	4.72	7.65269	3.16658	-1.28795	0	0	0	2
AC HOTELES S.A.	South Korea	2	0	10	0	10	0	0	0	0	0	4.00439	0.420141	0.172921	0.52605	0.19628	0.541667	-0.271032	3.7	0.900652	4.2	7.68389	3.16658	-1.28795	0	0	0	2
AC HOTELES S.A.	Costa Rica	2	0	15	6	9	0	0	0	0	0	3.93278	1.54875	0.662422	-3.86767	0.00206424	0	-1.55102	6.6	3.26941	5.91	6.63621	3.16658	-1.28795	0	0	0	2
AC HOTELES S.A.	Croacia	2	0	8	1	7	0	0	0	0	0	3.22565	1.27885	0.253946	0.26461	1.01215	0.666667	-1.55102	12.6	4.3578	4.28	6.64771	3.16658	-1.28795	0	0	0	2
AC HOTELES S.A.	Denmark	2	0	10	1	9	0	0	0	0	0	3.31418	0.590138	0.733766	0.26461	0.112828	0.166667	-1.04949	4.8	2.05207	3.05	6.73368	3.16658	-1.28795	0	0	0	2
AC HOTELES S.A.	Ecuador	2	0	18	5	13	0	0	0	0	0	3.95347	1.61213	0.825643	-3.38939	0.280888	0.133333	-1.55102	7.7	5.24269	4.74	7.12151	3.16658	-1.28795	0	0	0	2
AC HOTELES S.A.	El Salvador	2	0	12	2	10	0	0	0	0	0	3.94102	2.12139	0.718083	-3.86767	0.459103	0.666667	-1.55102	7.2	3.05173	2.75	6.83765	3.16658	-1.28795	0	0	0	2
AC HOTELES S.A.	Slovakia	2	0	13	1	12	0	0	0	0	0	3.29809	0.931708	0.0511288	0.26461	0.296655	0.333333	-1.29153	16.2	4.02343	6.04	6.73135	3.16658	-1.28795	0	0	0	2
AC HOTELES S.A.	Slovenia	2	0	6	0	6	0	0	0	0	0	3.20355	0.40353	0.182051	0.26461	0.101477	0.333333	-1.29153	6.5	1.4438	4.03	6.30114	3.16658	-1.28795	0	0	0	2
AC HOTELES S.A.	USA	2	0	74	13	61	0	0	0	0	0	3.87141	0.553655	1.26073	-0.69195	0.15745	0.166667	-1.29153	5.1	0.800894	3.2	8.47189	3.16658	-1.28795	0	0	0	2
AC HOTELES S.A.	Estonia	2	0	3	0	3	0	0	0	0	0	3.46571	0.927963	0.110104	0.26461	0.20986	0.666667	-0.530518	7.9	20.7518	10.47	6.12908	3.16658	-1.28795	0	0	0	2
AC HOTELES S.A.	Ethiopia	2	0	2	0	2	0	0	0	0	0	3.72911	2.78128	1.3431	0.26461	1.26883	0.333333	-0.530518	5.4	1.80247	10.2	7.85282	3.16658	-1.28795	0	0	0	2
AC HOTELES S.A.	Philippine	2	0	12	2	10	0	0	0	0	0	4.07154	1.53391	0.995918	0.26461	0.359399	0.208333	-1.55102	7.7	1.1508	4.97	7.91936	3.16658	-1.28795	0	0	0	2
AC HOTELES S.A.	Finland	2	0	9	2	7	0	0	0	0	0	3.48105	0.507403	0.679478	0.52605	0.114138	0.0833333	-1.04949	8.4	2.36125	2.09	6.71984	3.16658	-1.28795	0	0	0	2
AC HOTELES S.A.	France	2	0	80	16	64	0	0	0	0	0	2.98175	0.490732	0.583416	-0.25827	0.0417816	0.333333	-1.29153	8.9	2.98952	1.19	7.78442	3.16658	-1.28795	0	0	0	2
AC HOTELES S.A.	Greece	2	0	20	0	20	0	0	0	0	0	3.35976	0.538884	0.215795	0.26461	0.101199	0.166667	-1.04949	9.8	0.269531	3.66	7.04548	3.16658	-1.28795	0	0	0	2
AC HOTELES S.A.	The Netherlands	2	0	23	4	19	0	0	0	0	0	3.17633	0.566689	0.663452	0.26461	0.0980731	0	-1.29153	4.7	6.98972	1.13	7.21272	3.16658	-1.28795	0	0	0	2
AC HOTELES S.A.	Hungary	2	0	20	3	17	0	0	0	0	0	3.29217	1.2511	0.147629	0.52605	0.00651064	0	-1.29153	7.2	6.0699	4.25	7.00376	3.16658	-1.28795	0	0	0	2
AC HOTELES S.A.	India	2	0	18	1	17	0	0	0	0	0	3.88339	2.24326	1.22135	0.26461	0.405146	0.333333	1.26844	4.4	0.818883	9.23	9.03925	3.16658	-1.28795	0	0	0	2
AC HOTELES S.A.	Ireland	2	0	19	1	18	0	0	0	0	0	3.18256	0.764228	0.019023	0.26461	0.0741923	0.666667	-1.55102	4.3	-11.284	5.5	6.619	3.16658	-1.28795	0	0	0	2
AC HOTELES S.A.	Iceland	2	0	2	0	2	0	0	0	0	0	3.47432	0.957051	0.692716	0.26461	0.110148	0.666667	-1.04949	2.6	14.7276	5.53	5.47239	3.16658	-1.28795	0	0	0	2
AC HOTELES S.A.	Israel	2	0	9	2	7	0	0	0	0	0	3.54353	1.46344	0.103381	-0.21367	0.110461	0	1.01767	9	4.52632	5.17	6.84033	3.16658	-1.28795	0	0	0	2
AC HOTELES S.A.	Italy	2	1	65	13	52	0	0	0	0	0	3.12249	0.419623	0.297329	-0.25827	0.00573603	0.25	-1.29153	7.7	1.13309	-3.56	7.76795	3.16658	-1.28795	0	0	0	2
AC HOTELES S.A.	Japan	2	0	15	1	14	0	0	0	0	0	4.02876	0.661939	0.887715	0.52605	0.0207448	0.416667	1.26844	4.4	0.0612047	2.6	8.10644	3.16658	-1.28795	0	0	0	2
AC HOTELES S.A.	Latvia	2	0	3	0	3	0	0	0	0	0	3.43418	0.923385	0.149979	0.26461	0.312954	0.416667	-1.03204	8.9	3.9397	10.6	6.36182	3.16658	-1.28795	0	0	0	2
AC HOTELES S.A.	Lithuania	2	0	2	0	2	0	0	0	0	0	3.41598	0.941538	0.270507	0.26461	0.206518	0.25	-1.29153	8.3	3.93337	7.56	6.5333	3.16658	-1.28795	0	0	0	2
AC HOTELES S.A.	Luxembourg	2	0	8	1	7	0	0	0	0	0	3.11354	1.69208	0.929135	-0.25827	0.11085	0.166667	-1.55102	4.5	10.1045	4.03	5.65964	3.16658	-1.28795	0	0	0	2
AC HOTELES S.A.	Malta	2	0	3	1	2	0	0	0	0	0	3.20679	1.13972	0.366184	0.52605	0.130339	0.333333	-1.55102	7.3	10.5646	2.49	5.60584	3.16658	-1.28795	0	0	0	2
AC HOTELES S.A.	Morocco	2	0	40	6	34	0	0	0	0	0	2.94765	2.40856	0.965929	0.52605	1.13327	0.166667	1.27716	11	5.6818	1.72	7.47918	3.16658	-1.28795	0	0	0	2
AC HOTELES S.A.	Mexico	2	0	68	17	51	0	0	0	0	0	3.96116	1.61593	0.61242	-3.86767	0.803904	0.333333	-1.55102	3.5	2.35186	2.8	8.01321	3.16658	-1.28795	0	0	0	2
AC HOTELES S.A.	Nigeria	2	0	2	0	2	0	0	0	0	0	3.5664	2.38172	1.08093	0.26461	1.74765	0.666667	-0.530518	5.6	3.50758	6.1	8.15031	3.16658	-1.28795	0	0	0	2
AC HOTELES S.A.	Norway	2	0	10	1	9	0	0	0	0	0	3.39007	0.558513	0.773884	0.26461	0.110833	0.166667	-1.04949	4.6	1.15494	2.26	6.66495	3.16658	-1.28795	0	0	0	2
AC HOTELES S.A.	New Zealand	2	0	2	0	2	0	0	0	0	0	4.2904	0.485975	0.553697	0.26461	0.0975475	0.666667	-0.790003	3.8	1.46672	1.9	6.61267	3.16658	-1.28795	0	0	0	2
AC HOTELES S.A.	Panama	2	0	24	6	18	0	0	0	0	0	3.91924	1.43673	0.720964	-3.38939	0.445543	0.666667	-1.29153	9.8	4.37245	6.91	6.5094	3.16658	-1.28795	0	0	0	2
AC HOTELES S.A.	Peru	2	0	33	11	22	0	0	0	0	0	3.97657	1.42631	0.798443	-3.38939	0.983327	0.666667	-1.55102	5.2	3.2493	6.45	7.44667	3.16658	-1.28795	0	0	0	2
AC HOTELES S.A.	Poland	2	0	53	5	48	0	0	0	0	0	3.33558	1.19959	0.38872	0.26461	0.0799061	0.25	-1.29153	17.7	2.54782	3.55	7.58167	3.16658	-1.28795	0	0	0	2
AC HOTELES S.A.	Portugal	2	1	102	24	78	0	0	0	0	0	2.8324	0.769779	0.315828	-0.25827	0.0980653	0.166667	-1.29153	7.6	1.69826	0.37	7.02323	3.16658	-1.28795	0	0	0	2
AC HOTELES S.A.	UK	2	0	68	16	52	0	0	0	0	0	3.15698	0.805554	0.679132	0.26461	0.00306242	0.5	-0.790003	4.7	7.47323	1.82	7.77979	3.16658	-1.28795	0	0	0	2
AC HOTELES S.A.	Czech Republic	2	0	28	3	25	0	0	0	0	0	3.26204	0.685613	0.00167352	0.26461	0.00949857	0.666667	-1.03204	7.9	8.86508	6.08	7.01005	3.16658	-1.28795	0	0	0	2
AC HOTELES S.A.	Romania	2	0	20	4	16	0	0	0	0	0	3.37913	1.01845	0.52496	-0.25827	0.348609	0.5	-0.790003	7.2	6.46266	4.1	7.33514	3.16658	-1.28795	0	0	0	2
AC HOTELES S.A.	Rusia	2	0	24	2	22	0	0	0	0	0	3.62123	0.696054	0.111071	0.26461	0.792843	0.666667	-0.790003	7.1	1.90974	6.4	8.15568	3.16658	-1.28795	0	0	0	2
AC HOTELES S.A.	Serbia	2	0	7	0	7	0	0	0	0	0	3.30011	1.33787	0.652569	0.26461	1.71416	0.333333	-0.790003	20.8	5.64939	4.68	6.90656	3.16658	-1.28795	0	0	0	2
AC HOTELES S.A.	Singapur	2	0	13	2	11	0	0	0	0	0	4.05448	1.4349	0.479333	0.26461	1.00484	0.666667	1.00895	4.1	17.2101	6.62	6.63767	3.16658	-1.28795	0	0	0	2
AC HOTELES S.A.	South Africa	2	0	14	3	11	0	0	0	0	0	3.91822	1.72008	0.6954	0.26461	0.167296	0	-0.790003	23.8	2.63118	5.1	7.67106	3.16658	-1.28795	0	0	0	2
AC HOTELES S.A.	Sweden	2	0	15	2	13	0	0	0	0	0	3.3956	0.90496	0.81257	0.26461	0.108496	0	-0.790003	7.7	3.74326	2.7	6.9554	3.16658	-1.28795	0	0	0	2
AC HOTELES S.A.	Switzerland	2	0	18	5	13	0	0	0	0	0	3.91415	0.836495	0.694867	-0.21367	0.150978	0.166667	-1.55102	4.4	1.57889	1.9	6.8714	3.16658	-1.28795	0	0	0	2
AC HOTELES S.A.	Thailand	2	0	14	2	12	0	0	0	0	0	4.00637	1.44759	1.08846	0.52605	0.353899	0.666667	1.26844	1.3	2.09225	4.49	7.80776	3.16658	-1.28795	0	0	0	2
AC HOTELES S.A.	Turquia	2	0	18	1	17	0	0	0	0	0	3.47222	1.60088	0.7561	0.52605	0.628774	0.666667	1.27716	10.6	2.66423	7.38	7.85772	3.16658	-1.28795	0	0	0	2
AC HOTELES S.A.	Uruguay	2	0	23	9	14	0	0	0	0	0	3.99607	1.1487	0.233146	-3.86767	0.14597	0.666667	-1.29153	12.2	3.61146	6.56	6.51927	3.16658	-1.28795	0	0	0	2
AC HOTELES S.A.	Venezuela	2	0	31	9	22	0	0	0	0	0	3.8557	1.76796	0.336214	-3.86767	0.309872	0.166667	-1.55102	11.4	2.04181	10.33	7.42451	3.16658	-1.28795	0	0	0	2
ACERINOX SA	Germany	3	0	56	29	27	1	0	0	0	0	3.21148	0.536164	0.562607	0.26461	0.0541978	0.666667	-1.29153	11.1	1.16865	0.96	7.91629	3.74126	19.22	1	1	0	25
ACERINOX SA	Argentina	3	1	61	22	39	1	0	0	0	0	4.00345	1.28036	0.249754	-3.86767	0.279269	0.666667	-1.55102	10.6	2.54485	9.18	7.58824	3.74126	19.22	1	1	0	25
ACERINOX SA	Australia	3	1	18	12	6	1	0	0	0	0	4.23231	0.567562	0.721527	0.26461	0.165512	0	-1.29153	5	-4.71452	2.8	7.30812	3.74126	19.22	1	1	0	25
ACERINOX SA	Austria	3	0	13	10	3	1	0	0	0	0	3.23123	0.588788	0.518591	0.26461	0.0931028	0.333333	-1.55102	5.2	2.91401	1.8	6.91557	3.74126	19.22	1	1	0	25
ACERINOX SA	Bangladesh	3	0	2	1	1	1	0	0	0	0	3.93561	2.63734	1.3076	0.26461	0.590559	0.333333	1.27716	4.3	1.15269	5.96	8.15174	3.74126	19.22	1	1	0	25
ACERINOX SA	Belgium	3	1	38	15	23	1	0	0	0	0	3.13244	0.777357	0.634216	-0.25827	0.130961	0.666667	-1.29153	8.4	6.38874	1.25	7.02031	3.74126	19.22	1	1	0	25
ACERINOX SA	Brasil	3	1	53	24	29	1	0	0	0	0	3.89327	1.91931	0.602092	-0.25827	0.406583	0.25	-1.55102	9.3	1.70724	2.94	8.27046	3.74126	19.22	1	1	0	25
ACERINOX SA	Bulgaria	3	0	13	5	8	1	0	0	0	0	3.36942	1.12444	0.190378	0.26461	0.191694	0.5	-0.790003	10.1	8.1765	6.25	6.88874	3.74126	19.22	1	1	0	25
ACERINOX SA	Canada	3	1	23	11	12	1	0	0	0	0	3.81425	0.103029	0.79255	-0.25827	0.161496	0.166667	-1.29153	6.7	3.0366	2.9	7.50919	3.74126	19.22	1	1	0	25
ACERINOX SA	Chile	3	1	49	17	32	1	0	0	0	0	4.03132	1.48778	0.490568	-3.86767	0.146208	0.416667	-1.55102	8	5.60687	5.71	7.21206	3.74126	19.22	1	1	0	25
ACERINOX SA	China	3	1	44	28	16	1	0	0	0	0	3.98191	1.90078	1.11489	0.52605	1.8939	0.333333	1.26844	4.2	3.22686	10.2	9.11544	3.74126	19.22	1	1	0	25
ACERINOX SA	Colombia	3	1	33	7	26	1	0	0	0	0	3.90663	1.54759	0.748636	-3.86767	0.629637	0.166667	-1.55102	12	8.29023	4.72	7.65269	3.74126	19.22	1	1	0	25
ACERINOX SA	South Korea	3	0	10	9	1	1	0	0	0	0	4.00439	0.420141	0.172921	0.52605	0.19628	0.541667	-0.271032	3.7	0.900652	4.2	7.68389	3.74126	19.22	1	1	0	25
ACERINOX SA	Costa Rica	3	0	15	4	11	1	0	0	0	0	3.93278	1.54875	0.662422	-3.86767	0.00206424	0	-1.55102	6.6	3.26941	5.91	6.63621	3.74126	19.22	1	1	0	25
ACERINOX SA	Croacia	3	0	8	5	3	1	0	0	0	0	3.22565	1.27885	0.253946	0.26461	1.01215	0.666667	-1.55102	12.6	4.3578	4.28	6.64771	3.74126	19.22	1	1	0	25
ACERINOX SA	Denmark	3	0	10	6	4	1	0	0	0	0	3.31418	0.590138	0.733766	0.26461	0.112828	0.166667	-1.04949	4.8	2.05207	3.05	6.73368	3.74126	19.22	1	1	0	25
ACERINOX SA	Ecuador	3	0	18	4	14	1	0	0	0	0	3.95347	1.61213	0.825643	-3.38939	0.280888	0.133333	-1.55102	7.7	5.24269	4.74	7.12151	3.74126	19.22	1	1	0	25
ACERINOX SA	El Salvador	3	0	12	4	8	1	0	0	0	0	3.94102	2.12139	0.718083	-3.86767	0.459103	0.666667	-1.55102	7.2	3.05173	2.75	6.83765	3.74126	19.22	1	1	0	25
ACERINOX SA	Slovakia	3	0	13	9	4	1	0	0	0	0	3.29809	0.931708	0.0511288	0.26461	0.296655	0.333333	-1.29153	16.2	4.02343	6.04	6.73135	3.74126	19.22	1	1	0	25
ACERINOX SA	Slovenia	3	0	6	5	1	1	0	0	0	0	3.20355	0.40353	0.182051	0.26461	0.101477	0.333333	-1.29153	6.5	1.4438	4.03	6.30114	3.74126	19.22	1	1	0	25
ACERINOX SA	USA	3	0	74	32	42	1	0	0	0	0	3.87141	0.553655	1.26073	-0.69195	0.15745	0.166667	-1.29153	5.1	0.800894	3.2	8.47189	3.74126	19.22	1	1	0	25
ACERINOX SA	Estonia	3	0	3	2	1	1	0	0	0	0	3.46571	0.927963	0.110104	0.26461	0.20986	0.666667	-0.530518	7.9	20.7518	10.47	6.12908	3.74126	19.22	1	1	0	25
ACERINOX SA	Ethiopia	3	0	2	0	2	1	0	0	0	0	3.72911	2.78128	1.3431	0.26461	1.26883	0.333333	-0.530518	5.4	1.80247	10.2	7.85282	3.74126	19.22	1	1	0	25
ACERINOX SA	Philippine	3	0	12	8	4	1	0	0	0	0	4.07154	1.53391	0.995918	0.26461	0.359399	0.208333	-1.55102	7.7	1.1508	4.97	7.91936	3.74126	19.22	1	1	0	25
ACERINOX SA	Finland	3	0	9	5	4	1	0	0	0	0	3.48105	0.507403	0.679478	0.52605	0.114138	0.0833333	-1.04949	8.4	2.36125	2.09	6.71984	3.74126	19.22	1	1	0	25
ACERINOX SA	France	3	1	80	38	42	1	0	0	0	0	2.98175	0.490732	0.583416	-0.25827	0.0417816	0.333333	-1.29153	8.9	2.98952	1.19	7.78442	3.74126	19.22	1	1	0	25
ACERINOX SA	Greece	3	0	20	11	9	1	0	0	0	0	3.35976	0.538884	0.215795	0.26461	0.101199	0.166667	-1.04949	9.8	0.269531	3.66	7.04548	3.74126	19.22	1	1	0	25
ACERINOX SA	The Netherlands	3	1	23	15	8	1	0	0	0	0	3.17633	0.566689	0.663452	0.26461	0.0980731	0	-1.29153	4.7	6.98972	1.13	7.21272	3.74126	19.22	1	1	0	25
ACERINOX SA	Hungary	3	0	20	12	8	1	0	0	0	0	3.29217	1.2511	0.147629	0.52605	0.00651064	0	-1.29153	7.2	6.0699	4.25	7.00376	3.74126	19.22	1	1	0	25
ACERINOX SA	India	3	0	18	11	7	1	0	0	0	0	3.88339	2.24326	1.22135	0.26461	0.405146	0.333333	1.26844	4.4	0.818883	9.23	9.03925	3.74126	19.22	1	1	0	25
ACERINOX SA	Ireland	3	0	19	7	12	1	0	0	0	0	3.18256	0.764228	0.019023	0.26461	0.0741923	0.666667	-1.55102	4.3	-11.284	5.5	6.619	3.74126	19.22	1	1	0	25
ACERINOX SA	Iceland	3	0	2	2	0	1	0	0	0	0	3.47432	0.957051	0.692716	0.26461	0.110148	0.666667	-1.04949	2.6	14.7276	5.53	5.47239	3.74126	19.22	1	1	0	25
ACERINOX SA	Israel	3	0	9	4	5	1	0	0	0	0	3.54353	1.46344	0.103381	-0.21367	0.110461	0	1.01767	9	4.52632	5.17	6.84033	3.74126	19.22	1	1	0	25
ACERINOX SA	Italy	3	1	65	33	32	1	0	0	0	0	3.12249	0.419623	0.297329	-0.25827	0.00573603	0.25	-1.29153	7.7	1.13309	-3.56	7.76795	3.74126	19.22	1	1	0	25
ACERINOX SA	Japan	3	1	15	10	5	1	0	0	0	0	4.02876	0.661939	0.887715	0.52605	0.0207448	0.416667	1.26844	4.4	0.0612047	2.6	8.10644	3.74126	19.22	1	1	0	25
ACERINOX SA	Latvia	3	0	3	2	1	1	0	0	0	0	3.43418	0.923385	0.149979	0.26461	0.312954	0.416667	-1.03204	8.9	3.9397	10.6	6.36182	3.74126	19.22	1	1	0	25
ACERINOX SA	Lithuania	3	0	2	2	0	1	0	0	0	0	3.41598	0.941538	0.270507	0.26461	0.206518	0.25	-1.29153	8.3	3.93337	7.56	6.5333	3.74126	19.22	1	1	0	25
ACERINOX SA	Luxembourg	3	0	8	6	2	1	0	0	0	0	3.11354	1.69208	0.929135	-0.25827	0.11085	0.166667	-1.55102	4.5	10.1045	4.03	5.65964	3.74126	19.22	1	1	0	25
ACERINOX SA	Malta	3	0	3	2	1	1	0	0	0	0	3.20679	1.13972	0.366184	0.52605	0.130339	0.333333	-1.55102	7.3	10.5646	2.49	5.60584	3.74126	19.22	1	1	0	25
ACERINOX SA	Morocco	3	0	40	20	20	1	0	0	0	0	2.94765	2.40856	0.965929	0.52605	1.13327	0.166667	1.27716	11	5.6818	1.72	7.47918	3.74126	19.22	1	1	0	25
ACERINOX SA	Mexico	3	1	68	26	42	1	0	0	0	0	3.96116	1.61593	0.61242	-3.86767	0.803904	0.333333	-1.55102	3.5	2.35186	2.8	8.01321	3.74126	19.22	1	1	0	25
ACERINOX SA	Nigeria	3	0	2	1	1	1	0	0	0	0	3.5664	2.38172	1.08093	0.26461	1.74765	0.666667	-0.530518	5.6	3.50758	6.1	8.15031	3.74126	19.22	1	1	0	25
ACERINOX SA	Norway	3	1	10	8	2	1	0	0	0	0	3.39007	0.558513	0.773884	0.26461	0.110833	0.166667	-1.04949	4.6	1.15494	2.26	6.66495	3.74126	19.22	1	1	0	25
ACERINOX SA	New Zealand	3	0	2	2	0	1	0	0	0	0	4.2904	0.485975	0.553697	0.26461	0.0975475	0.666667	-0.790003	3.8	1.46672	1.9	6.61267	3.74126	19.22	1	1	0	25
ACERINOX SA	Panama	3	0	24	7	17	1	0	0	0	0	3.91924	1.43673	0.720964	-3.38939	0.445543	0.666667	-1.29153	9.8	4.37245	6.91	6.5094	3.74126	19.22	1	1	0	25
ACERINOX SA	Peru	3	1	33	8	25	1	0	0	0	0	3.97657	1.42631	0.798443	-3.38939	0.983327	0.666667	-1.55102	5.2	3.2493	6.45	7.44667	3.74126	19.22	1	1	0	25
ACERINOX SA	Poland	3	1	53	27	26	1	0	0	0	0	3.33558	1.19959	0.38872	0.26461	0.0799061	0.25	-1.29153	17.7	2.54782	3.55	7.58167	3.74126	19.22	1	1	0	25
ACERINOX SA	Portugal	3	1	102	38	64	1	0	0	0	0	2.8324	0.769779	0.315828	-0.25827	0.0980653	0.166667	-1.29153	7.6	1.69826	0.37	7.02323	3.74126	19.22	1	1	0	25
ACERINOX SA	UK	3	1	68	27	41	1	0	0	0	0	3.15698	0.805554	0.679132	0.26461	0.00306242	0.5	-0.790003	4.7	7.47323	1.82	7.77979	3.74126	19.22	1	1	0	25
ACERINOX SA	Czech Republic	3	0	28	18	10	1	0	0	0	0	3.26204	0.685613	0.00167352	0.26461	0.00949857	0.666667	-1.03204	7.9	8.86508	6.08	7.01005	3.74126	19.22	1	1	0	25
ACERINOX SA	Romania	3	0	20	9	11	1	0	0	0	0	3.37913	1.01845	0.52496	-0.25827	0.348609	0.5	-0.790003	7.2	6.46266	4.1	7.33514	3.74126	19.22	1	1	0	25
ACERINOX SA	Rusia	3	0	24	16	8	1	0	0	0	0	3.62123	0.696054	0.111071	0.26461	0.792843	0.666667	-0.790003	7.1	1.90974	6.4	8.15568	3.74126	19.22	1	1	0	25
ACERINOX SA	Serbia	3	0	7	4	3	1	0	0	0	0	3.30011	1.33787	0.652569	0.26461	1.71416	0.333333	-0.790003	20.8	5.64939	4.68	6.90656	3.74126	19.22	1	1	0	25
ACERINOX SA	Singapur	3	1	13	10	3	1	0	0	0	0	4.05448	1.4349	0.479333	0.26461	1.00484	0.666667	1.00895	4.1	17.2101	6.62	6.63767	3.74126	19.22	1	1	0	25
ACERINOX SA	South Africa	3	1	14	6	8	1	0	0	0	0	3.91822	1.72008	0.6954	0.26461	0.167296	0	-0.790003	23.8	2.63118	5.1	7.67106	3.74126	19.22	1	1	0	25
ACERINOX SA	Sweden	3	1	15	9	6	1	0	0	0	0	3.3956	0.90496	0.81257	0.26461	0.108496	0	-0.790003	7.7	3.74326	2.7	6.9554	3.74126	19.22	1	1	0	25
ACERINOX SA	Switzerland	3	1	18	8	10	1	0	0	0	0	3.91415	0.836495	0.694867	-0.21367	0.150978	0.166667	-1.55102	4.4	1.57889	1.9	6.8714	3.74126	19.22	1	1	0	25
ACERINOX SA	Thailand	3	0	14	10	4	1	0	0	0	0	4.00637	1.44759	1.08846	0.52605	0.353899	0.666667	1.26844	1.3	2.09225	4.49	7.80776	3.74126	19.22	1	1	0	25
ACERINOX SA	Turquia	3	1	18	13	5	1	0	0	0	0	3.47222	1.60088	0.7561	0.52605	0.628774	0.666667	1.27716	10.6	2.66423	7.38	7.85772	3.74126	19.22	1	1	0	25
ACERINOX SA	Uruguay	3	0	23	7	16	1	0	0	0	0	3.99607	1.1487	0.233146	-3.86767	0.14597	0.666667	-1.29153	12.2	3.61146	6.56	6.51927	3.74126	19.22	1	1	0	25
ACERINOX SA	Venezuela	3	1	31	11	20	1	0	0	0	0	3.8557	1.76796	0.336214	-3.86767	0.309872	0.166667	-1.55102	11.4	2.04181	10.33	7.42451	3.74126	19.22	1	1	0	25
ACS ACTIVIDADES DE CONSTRUCCION Y SERVICIOS SA	Germany	4	1	56	6	50	0	0	1	0	0	3.21148	0.536164	0.562607	0.26461	0.0541978	0.666667	-1.29153	11.1	1.16865	0.96	7.91629	4.80377	24.8516	1	0	1	46
ACS ACTIVIDADES DE CONSTRUCCION Y SERVICIOS SA	Argentina	4	1	61	8	53	0	0	1	0	0	4.00345	1.28036	0.249754	-3.86767	0.279269	0.666667	-1.55102	10.6	2.54485	9.18	7.58824	4.80377	24.8516	1	0	1	46
ACS ACTIVIDADES DE CONSTRUCCION Y SERVICIOS SA	Australia	4	1	18	4	14	0	0	1	0	0	4.23231	0.567562	0.721527	0.26461	0.165512	0	-1.29153	5	-4.71452	2.8	7.30812	4.80377	24.8516	1	0	1	46
ACS ACTIVIDADES DE CONSTRUCCION Y SERVICIOS SA	Austria	4	0	13	0	13	0	0	1	0	0	3.23123	0.588788	0.518591	0.26461	0.0931028	0.333333	-1.55102	5.2	2.91401	1.8	6.91557	4.80377	24.8516	1	0	1	46
ACS ACTIVIDADES DE CONSTRUCCION Y SERVICIOS SA	Bangladesh	4	0	2	0	2	0	0	1	0	0	3.93561	2.63734	1.3076	0.26461	0.590559	0.333333	1.27716	4.3	1.15269	5.96	8.15174	4.80377	24.8516	1	0	1	46
ACS ACTIVIDADES DE CONSTRUCCION Y SERVICIOS SA	Belgium	4	1	38	4	34	0	0	1	0	0	3.13244	0.777357	0.634216	-0.25827	0.130961	0.666667	-1.29153	8.4	6.38874	1.25	7.02031	4.80377	24.8516	1	0	1	46
ACS ACTIVIDADES DE CONSTRUCCION Y SERVICIOS SA	Brasil	4	1	53	6	47	0	0	1	0	0	3.89327	1.91931	0.602092	-0.25827	0.406583	0.25	-1.55102	9.3	1.70724	2.94	8.27046	4.80377	24.8516	1	0	1	46
ACS ACTIVIDADES DE CONSTRUCCION Y SERVICIOS SA	Bulgaria	4	0	13	5	8	0	0	1	0	0	3.36942	1.12444	0.190378	0.26461	0.191694	0.5	-0.790003	10.1	8.1765	6.25	6.88874	4.80377	24.8516	1	0	1	46
ACS ACTIVIDADES DE CONSTRUCCION Y SERVICIOS SA	Canada	4	1	23	3	20	0	0	1	0	0	3.81425	0.103029	0.79255	-0.25827	0.161496	0.166667	-1.29153	6.7	3.0366	2.9	7.50919	4.80377	24.8516	1	0	1	46
ACS ACTIVIDADES DE CONSTRUCCION Y SERVICIOS SA	Chile	4	1	49	8	41	0	0	1	0	0	4.03132	1.48778	0.490568	-3.86767	0.146208	0.416667	-1.55102	8	5.60687	5.71	7.21206	4.80377	24.8516	1	0	1	46
ACS ACTIVIDADES DE CONSTRUCCION Y SERVICIOS SA	China	4	1	44	4	40	0	0	1	0	0	3.98191	1.90078	1.11489	0.52605	1.8939	0.333333	1.26844	4.2	3.22686	10.2	9.11544	4.80377	24.8516	1	0	1	46
ACS ACTIVIDADES DE CONSTRUCCION Y SERVICIOS SA	Colombia	4	1	33	3	30	0	0	1	0	0	3.90663	1.54759	0.748636	-3.86767	0.629637	0.166667	-1.55102	12	8.29023	4.72	7.65269	4.80377	24.8516	1	0	1	46
ACS ACTIVIDADES DE CONSTRUCCION Y SERVICIOS SA	South Korea	4	0	10	0	10	0	0	1	0	0	4.00439	0.420141	0.172921	0.52605	0.19628	0.541667	-0.271032	3.7	0.900652	4.2	7.68389	4.80377	24.8516	1	0	1	46
ACS ACTIVIDADES DE CONSTRUCCION Y SERVICIOS SA	Costa Rica	4	0	15	1	14	0	0	1	0	0	3.93278	1.54875	0.662422	-3.86767	0.00206424	0	-1.55102	6.6	3.26941	5.91	6.63621	4.80377	24.8516	1	0	1	46
ACS ACTIVIDADES DE CONSTRUCCION Y SERVICIOS SA	Croacia	4	0	8	2	6	0	0	1	0	0	3.22565	1.27885	0.253946	0.26461	1.01215	0.666667	-1.55102	12.6	4.3578	4.28	6.64771	4.80377	24.8516	1	0	1	46
ACS ACTIVIDADES DE CONSTRUCCION Y SERVICIOS SA	Denmark	4	0	10	0	10	0	0	1	0	0	3.31418	0.590138	0.733766	0.26461	0.112828	0.166667	-1.04949	4.8	2.05207	3.05	6.73368	4.80377	24.8516	1	0	1	46
ACS ACTIVIDADES DE CONSTRUCCION Y SERVICIOS SA	Ecuador	4	1	18	2	16	0	0	1	0	0	3.95347	1.61213	0.825643	-3.38939	0.280888	0.133333	-1.55102	7.7	5.24269	4.74	7.12151	4.80377	24.8516	1	0	1	46
ACS ACTIVIDADES DE CONSTRUCCION Y SERVICIOS SA	El Salvador	4	1	12	2	10	0	0	1	0	0	3.94102	2.12139	0.718083	-3.86767	0.459103	0.666667	-1.55102	7.2	3.05173	2.75	6.83765	4.80377	24.8516	1	0	1	46
ACS ACTIVIDADES DE CONSTRUCCION Y SERVICIOS SA	Slovakia	4	0	13	1	12	0	0	1	0	0	3.29809	0.931708	0.0511288	0.26461	0.296655	0.333333	-1.29153	16.2	4.02343	6.04	6.73135	4.80377	24.8516	1	0	1	46
ACS ACTIVIDADES DE CONSTRUCCION Y SERVICIOS SA	Slovenia	4	0	6	1	5	0	0	1	0	0	3.20355	0.40353	0.182051	0.26461	0.101477	0.333333	-1.29153	6.5	1.4438	4.03	6.30114	4.80377	24.8516	1	0	1	46
ACS ACTIVIDADES DE CONSTRUCCION Y SERVICIOS SA	USA	4	1	74	7	67	0	0	1	0	0	3.87141	0.553655	1.26073	-0.69195	0.15745	0.166667	-1.29153	5.1	0.800894	3.2	8.47189	4.80377	24.8516	1	0	1	46
ACS ACTIVIDADES DE CONSTRUCCION Y SERVICIOS SA	Estonia	4	0	3	0	3	0	0	1	0	0	3.46571	0.927963	0.110104	0.26461	0.20986	0.666667	-0.530518	7.9	20.7518	10.47	6.12908	4.80377	24.8516	1	0	1	46
ACS ACTIVIDADES DE CONSTRUCCION Y SERVICIOS SA	Ethiopia	4	1	2	2	0	0	0	1	0	0	3.72911	2.78128	1.3431	0.26461	1.26883	0.333333	-0.530518	5.4	1.80247	10.2	7.85282	4.80377	24.8516	1	0	1	46
ACS ACTIVIDADES DE CONSTRUCCION Y SERVICIOS SA	Philippine	4	0	12	1	11	0	0	1	0	0	4.07154	1.53391	0.995918	0.26461	0.359399	0.208333	-1.55102	7.7	1.1508	4.97	7.91936	4.80377	24.8516	1	0	1	46
ACS ACTIVIDADES DE CONSTRUCCION Y SERVICIOS SA	Finland	4	0	9	0	9	0	0	1	0	0	3.48105	0.507403	0.679478	0.52605	0.114138	0.0833333	-1.04949	8.4	2.36125	2.09	6.71984	4.80377	24.8516	1	0	1	46
ACS ACTIVIDADES DE CONSTRUCCION Y SERVICIOS SA	France	4	1	80	10	70	0	0	1	0	0	2.98175	0.490732	0.583416	-0.25827	0.0417816	0.333333	-1.29153	8.9	2.98952	1.19	7.78442	4.80377	24.8516	1	0	1	46
ACS ACTIVIDADES DE CONSTRUCCION Y SERVICIOS SA	Greece	4	1	20	3	17	0	0	1	0	0	3.35976	0.538884	0.215795	0.26461	0.101199	0.166667	-1.04949	9.8	0.269531	3.66	7.04548	4.80377	24.8516	1	0	1	46
ACS ACTIVIDADES DE CONSTRUCCION Y SERVICIOS SA	The Netherlands	4	1	23	1	22	0	0	1	0	0	3.17633	0.566689	0.663452	0.26461	0.0980731	0	-1.29153	4.7	6.98972	1.13	7.21272	4.80377	24.8516	1	0	1	46
ACS ACTIVIDADES DE CONSTRUCCION Y SERVICIOS SA	Hungary	4	0	20	2	18	0	0	1	0	0	3.29217	1.2511	0.147629	0.52605	0.00651064	0	-1.29153	7.2	6.0699	4.25	7.00376	4.80377	24.8516	1	0	1	46
ACS ACTIVIDADES DE CONSTRUCCION Y SERVICIOS SA	India	4	1	18	3	15	0	0	1	0	0	3.88339	2.24326	1.22135	0.26461	0.405146	0.333333	1.26844	4.4	0.818883	9.23	9.03925	4.80377	24.8516	1	0	1	46
ACS ACTIVIDADES DE CONSTRUCCION Y SERVICIOS SA	Ireland	4	1	19	5	14	0	0	1	0	0	3.18256	0.764228	0.019023	0.26461	0.0741923	0.666667	-1.55102	4.3	-11.284	5.5	6.619	4.80377	24.8516	1	0	1	46
ACS ACTIVIDADES DE CONSTRUCCION Y SERVICIOS SA	Iceland	4	0	2	0	2	0	0	1	0	0	3.47432	0.957051	0.692716	0.26461	0.110148	0.666667	-1.04949	2.6	14.7276	5.53	5.47239	4.80377	24.8516	1	0	1	46
ACS ACTIVIDADES DE CONSTRUCCION Y SERVICIOS SA	Israel	4	1	9	1	8	0	0	1	0	0	3.54353	1.46344	0.103381	-0.21367	0.110461	0	1.01767	9	4.52632	5.17	6.84033	4.80377	24.8516	1	0	1	46
ACS ACTIVIDADES DE CONSTRUCCION Y SERVICIOS SA	Italy	4	1	65	7	58	0	0	1	0	0	3.12249	0.419623	0.297329	-0.25827	0.00573603	0.25	-1.29153	7.7	1.13309	-3.56	7.76795	4.80377	24.8516	1	0	1	46
ACS ACTIVIDADES DE CONSTRUCCION Y SERVICIOS SA	Japan	4	0	15	0	15	0	0	1	0	0	4.02876	0.661939	0.887715	0.52605	0.0207448	0.416667	1.26844	4.4	0.0612047	2.6	8.10644	4.80377	24.8516	1	0	1	46
ACS ACTIVIDADES DE CONSTRUCCION Y SERVICIOS SA	Latvia	4	0	3	0	3	0	0	1	0	0	3.43418	0.923385	0.149979	0.26461	0.312954	0.416667	-1.03204	8.9	3.9397	10.6	6.36182	4.80377	24.8516	1	0	1	46
ACS ACTIVIDADES DE CONSTRUCCION Y SERVICIOS SA	Lithuania	4	0	2	0	2	0	0	1	0	0	3.41598	0.941538	0.270507	0.26461	0.206518	0.25	-1.29153	8.3	3.93337	7.56	6.5333	4.80377	24.8516	1	0	1	46
ACS ACTIVIDADES DE CONSTRUCCION Y SERVICIOS SA	Luxembourg	4	0	8	0	8	0	0	1	0	0	3.11354	1.69208	0.929135	-0.25827	0.11085	0.166667	-1.55102	4.5	10.1045	4.03	5.65964	4.80377	24.8516	1	0	1	46
ACS ACTIVIDADES DE CONSTRUCCION Y SERVICIOS SA	Malta	4	0	3	0	3	0	0	1	0	0	3.20679	1.13972	0.366184	0.52605	0.130339	0.333333	-1.55102	7.3	10.5646	2.49	5.60584	4.80377	24.8516	1	0	1	46
ACS ACTIVIDADES DE CONSTRUCCION Y SERVICIOS SA	Morocco	4	1	40	7	33	0	0	1	0	0	2.94765	2.40856	0.965929	0.52605	1.13327	0.166667	1.27716	11	5.6818	1.72	7.47918	4.80377	24.8516	1	0	1	46
ACS ACTIVIDADES DE CONSTRUCCION Y SERVICIOS SA	Mexico	4	1	68	6	62	0	0	1	0	0	3.96116	1.61593	0.61242	-3.86767	0.803904	0.333333	-1.55102	3.5	2.35186	2.8	8.01321	4.80377	24.8516	1	0	1	46
ACS ACTIVIDADES DE CONSTRUCCION Y SERVICIOS SA	Nigeria	4	0	2	0	2	0	0	1	0	0	3.5664	2.38172	1.08093	0.26461	1.74765	0.666667	-0.530518	5.6	3.50758	6.1	8.15031	4.80377	24.8516	1	0	1	46
ACS ACTIVIDADES DE CONSTRUCCION Y SERVICIOS SA	Norway	4	1	10	1	9	0	0	1	0	0	3.39007	0.558513	0.773884	0.26461	0.110833	0.166667	-1.04949	4.6	1.15494	2.26	6.66495	4.80377	24.8516	1	0	1	46
ACS ACTIVIDADES DE CONSTRUCCION Y SERVICIOS SA	New Zealand	4	0	2	0	2	0	0	1	0	0	4.2904	0.485975	0.553697	0.26461	0.0975475	0.666667	-0.790003	3.8	1.46672	1.9	6.61267	4.80377	24.8516	1	0	1	46
ACS ACTIVIDADES DE CONSTRUCCION Y SERVICIOS SA	Panama	4	1	24	4	20	0	0	1	0	0	3.91924	1.43673	0.720964	-3.38939	0.445543	0.666667	-1.29153	9.8	4.37245	6.91	6.5094	4.80377	24.8516	1	0	1	46
ACS ACTIVIDADES DE CONSTRUCCION Y SERVICIOS SA	Peru	4	1	33	3	30	0	0	1	0	0	3.97657	1.42631	0.798443	-3.38939	0.983327	0.666667	-1.55102	5.2	3.2493	6.45	7.44667	4.80377	24.8516	1	0	1	46
ACS ACTIVIDADES DE CONSTRUCCION Y SERVICIOS SA	Poland	4	1	53	10	43	0	0	1	0	0	3.33558	1.19959	0.38872	0.26461	0.0799061	0.25	-1.29153	17.7	2.54782	3.55	7.58167	4.80377	24.8516	1	0	1	46
ACS ACTIVIDADES DE CONSTRUCCION Y SERVICIOS SA	Portugal	4	1	102	13	89	0	0	1	0	0	2.8324	0.769779	0.315828	-0.25827	0.0980653	0.166667	-1.29153	7.6	1.69826	0.37	7.02323	4.80377	24.8516	1	0	1	46
ACS ACTIVIDADES DE CONSTRUCCION Y SERVICIOS SA	UK	4	1	68	9	59	0	0	1	0	0	3.15698	0.805554	0.679132	0.26461	0.00306242	0.5	-0.790003	4.7	7.47323	1.82	7.77979	4.80377	24.8516	1	0	1	46
ACS ACTIVIDADES DE CONSTRUCCION Y SERVICIOS SA	Czech Republic	4	0	28	2	26	0	0	1	0	0	3.26204	0.685613	0.00167352	0.26461	0.00949857	0.666667	-1.03204	7.9	8.86508	6.08	7.01005	4.80377	24.8516	1	0	1	46
ACS ACTIVIDADES DE CONSTRUCCION Y SERVICIOS SA	Romania	4	0	20	5	15	0	0	1	0	0	3.37913	1.01845	0.52496	-0.25827	0.348609	0.5	-0.790003	7.2	6.46266	4.1	7.33514	4.80377	24.8516	1	0	1	46
ACS ACTIVIDADES DE CONSTRUCCION Y SERVICIOS SA	Rusia	4	0	24	0	24	0	0	1	0	0	3.62123	0.696054	0.111071	0.26461	0.792843	0.666667	-0.790003	7.1	1.90974	6.4	8.15568	4.80377	24.8516	1	0	1	46
ACS ACTIVIDADES DE CONSTRUCCION Y SERVICIOS SA	Serbia	4	0	7	2	5	0	0	1	0	0	3.30011	1.33787	0.652569	0.26461	1.71416	0.333333	-0.790003	20.8	5.64939	4.68	6.90656	4.80377	24.8516	1	0	1	46
ACS ACTIVIDADES DE CONSTRUCCION Y SERVICIOS SA	Singapur	4	0	13	0	13	0	0	1	0	0	4.05448	1.4349	0.479333	0.26461	1.00484	0.666667	1.00895	4.1	17.2101	6.62	6.63767	4.80377	24.8516	1	0	1	46
ACS ACTIVIDADES DE CONSTRUCCION Y SERVICIOS SA	South Africa	4	1	14	2	12	0	0	1	0	0	3.91822	1.72008	0.6954	0.26461	0.167296	0	-0.790003	23.8	2.63118	5.1	7.67106	4.80377	24.8516	1	0	1	46
ACS ACTIVIDADES DE CONSTRUCCION Y SERVICIOS SA	Sweden	4	1	15	3	12	0	0	1	0	0	3.3956	0.90496	0.81257	0.26461	0.108496	0	-0.790003	7.7	3.74326	2.7	6.9554	4.80377	24.8516	1	0	1	46
ACS ACTIVIDADES DE CONSTRUCCION Y SERVICIOS SA	Switzerland	4	1	18	2	16	0	0	1	0	0	3.91415	0.836495	0.694867	-0.21367	0.150978	0.166667	-1.55102	4.4	1.57889	1.9	6.8714	4.80377	24.8516	1	0	1	46
ACS ACTIVIDADES DE CONSTRUCCION Y SERVICIOS SA	Thailand	4	0	14	0	14	0	0	1	0	0	4.00637	1.44759	1.08846	0.52605	0.353899	0.666667	1.26844	1.3	2.09225	4.49	7.80776	4.80377	24.8516	1	0	1	46
ACS ACTIVIDADES DE CONSTRUCCION Y SERVICIOS SA	Turquia	4	0	18	2	16	0	0	1	0	0	3.47222	1.60088	0.7561	0.52605	0.628774	0.666667	1.27716	10.6	2.66423	7.38	7.85772	4.80377	24.8516	1	0	1	46
ACS ACTIVIDADES DE CONSTRUCCION Y SERVICIOS SA	Uruguay	4	0	23	1	22	0	0	1	0	0	3.99607	1.1487	0.233146	-3.86767	0.14597	0.666667	-1.29153	12.2	3.61146	6.56	6.51927	4.80377	24.8516	1	0	1	46
ACS ACTIVIDADES DE CONSTRUCCION Y SERVICIOS SA	Venezuela	4	1	31	4	27	0	0	1	0	0	3.8557	1.76796	0.336214	-3.86767	0.309872	0.166667	-1.55102	11.4	2.04181	10.33	7.42451	4.80377	24.8516	1	0	1	46
ADOLFO DOMINGUEZ SA	Germany	5	1	56	29	27	1	0	0	0	0	3.21148	0.536164	0.562607	0.26461	0.0541978	0.666667	-1.29153	11.1	1.16865	0.96	7.91629	3.02284	22.5744	1	0	0	19
ADOLFO DOMINGUEZ SA	Argentina	5	1	61	22	39	1	0	0	0	0	4.00345	1.28036	0.249754	-3.86767	0.279269	0.666667	-1.55102	10.6	2.54485	9.18	7.58824	3.02284	22.5744	1	0	0	19
ADOLFO DOMINGUEZ SA	Australia	5	0	18	12	6	1	0	0	0	0	4.23231	0.567562	0.721527	0.26461	0.165512	0	-1.29153	5	-4.71452	2.8	7.30812	3.02284	22.5744	1	0	0	19
ADOLFO DOMINGUEZ SA	Austria	5	0	13	10	3	1	0	0	0	0	3.23123	0.588788	0.518591	0.26461	0.0931028	0.333333	-1.55102	5.2	2.91401	1.8	6.91557	3.02284	22.5744	1	0	0	19
ADOLFO DOMINGUEZ SA	Bangladesh	5	0	2	1	1	1	0	0	0	0	3.93561	2.63734	1.3076	0.26461	0.590559	0.333333	1.27716	4.3	1.15269	5.96	8.15174	3.02284	22.5744	1	0	0	19
ADOLFO DOMINGUEZ SA	Belgium	5	1	38	15	23	1	0	0	0	0	3.13244	0.777357	0.634216	-0.25827	0.130961	0.666667	-1.29153	8.4	6.38874	1.25	7.02031	3.02284	22.5744	1	0	0	19
ADOLFO DOMINGUEZ SA	Brasil	5	0	53	24	29	1	0	0	0	0	3.89327	1.91931	0.602092	-0.25827	0.406583	0.25	-1.55102	9.3	1.70724	2.94	8.27046	3.02284	22.5744	1	0	0	19
ADOLFO DOMINGUEZ SA	Bulgaria	5	0	13	5	8	1	0	0	0	0	3.36942	1.12444	0.190378	0.26461	0.191694	0.5	-0.790003	10.1	8.1765	6.25	6.88874	3.02284	22.5744	1	0	0	19
ADOLFO DOMINGUEZ SA	Canada	5	0	23	11	12	1	0	0	0	0	3.81425	0.103029	0.79255	-0.25827	0.161496	0.166667	-1.29153	6.7	3.0366	2.9	7.50919	3.02284	22.5744	1	0	0	19
ADOLFO DOMINGUEZ SA	Chile	5	0	49	17	32	1	0	0	0	0	4.03132	1.48778	0.490568	-3.86767	0.146208	0.416667	-1.55102	8	5.60687	5.71	7.21206	3.02284	22.5744	1	0	0	19
ADOLFO DOMINGUEZ SA	China	5	1	44	28	16	1	0	0	0	0	3.98191	1.90078	1.11489	0.52605	1.8939	0.333333	1.26844	4.2	3.22686	10.2	9.11544	3.02284	22.5744	1	0	0	19
ADOLFO DOMINGUEZ SA	Colombia	5	0	33	7	26	1	0	0	0	0	3.90663	1.54759	0.748636	-3.86767	0.629637	0.166667	-1.55102	12	8.29023	4.72	7.65269	3.02284	22.5744	1	0	0	19
ADOLFO DOMINGUEZ SA	South Korea	5	0	10	9	1	1	0	0	0	0	4.00439	0.420141	0.172921	0.52605	0.19628	0.541667	-0.271032	3.7	0.900652	4.2	7.68389	3.02284	22.5744	1	0	0	19
ADOLFO DOMINGUEZ SA	Costa Rica	5	0	15	4	11	1	0	0	0	0	3.93278	1.54875	0.662422	-3.86767	0.00206424	0	-1.55102	6.6	3.26941	5.91	6.63621	3.02284	22.5744	1	0	0	19
ADOLFO DOMINGUEZ SA	Croacia	5	0	8	5	3	1	0	0	0	0	3.22565	1.27885	0.253946	0.26461	1.01215	0.666667	-1.55102	12.6	4.3578	4.28	6.64771	3.02284	22.5744	1	0	0	19
ADOLFO DOMINGUEZ SA	Denmark	5	0	10	6	4	1	0	0	0	0	3.31418	0.590138	0.733766	0.26461	0.112828	0.166667	-1.04949	4.8	2.05207	3.05	6.73368	3.02284	22.5744	1	0	0	19
ADOLFO DOMINGUEZ SA	Ecuador	5	0	18	4	14	1	0	0	0	0	3.95347	1.61213	0.825643	-3.38939	0.280888	0.133333	-1.55102	7.7	5.24269	4.74	7.12151	3.02284	22.5744	1	0	0	19
ADOLFO DOMINGUEZ SA	El Salvador	5	0	12	4	8	1	0	0	0	0	3.94102	2.12139	0.718083	-3.86767	0.459103	0.666667	-1.55102	7.2	3.05173	2.75	6.83765	3.02284	22.5744	1	0	0	19
ADOLFO DOMINGUEZ SA	Slovakia	5	0	13	9	4	1	0	0	0	0	3.29809	0.931708	0.0511288	0.26461	0.296655	0.333333	-1.29153	16.2	4.02343	6.04	6.73135	3.02284	22.5744	1	0	0	19
ADOLFO DOMINGUEZ SA	Slovenia	5	0	6	5	1	1	0	0	0	0	3.20355	0.40353	0.182051	0.26461	0.101477	0.333333	-1.29153	6.5	1.4438	4.03	6.30114	3.02284	22.5744	1	0	0	19
ADOLFO DOMINGUEZ SA	USA	5	1	74	32	42	1	0	0	0	0	3.87141	0.553655	1.26073	-0.69195	0.15745	0.166667	-1.29153	5.1	0.800894	3.2	8.47189	3.02284	22.5744	1	0	0	19
ADOLFO DOMINGUEZ SA	Estonia	5	0	3	2	1	1	0	0	0	0	3.46571	0.927963	0.110104	0.26461	0.20986	0.666667	-0.530518	7.9	20.7518	10.47	6.12908	3.02284	22.5744	1	0	0	19
ADOLFO DOMINGUEZ SA	Ethiopia	5	0	2	0	2	1	0	0	0	0	3.72911	2.78128	1.3431	0.26461	1.26883	0.333333	-0.530518	5.4	1.80247	10.2	7.85282	3.02284	22.5744	1	0	0	19
ADOLFO DOMINGUEZ SA	Philippine	5	0	12	8	4	1	0	0	0	0	4.07154	1.53391	0.995918	0.26461	0.359399	0.208333	-1.55102	7.7	1.1508	4.97	7.91936	3.02284	22.5744	1	0	0	19
ADOLFO DOMINGUEZ SA	Finland	5	0	9	5	4	1	0	0	0	0	3.48105	0.507403	0.679478	0.52605	0.114138	0.0833333	-1.04949	8.4	2.36125	2.09	6.71984	3.02284	22.5744	1	0	0	19
ADOLFO DOMINGUEZ SA	France	5	1	80	38	42	1	0	0	0	0	2.98175	0.490732	0.583416	-0.25827	0.0417816	0.333333	-1.29153	8.9	2.98952	1.19	7.78442	3.02284	22.5744	1	0	0	19
ADOLFO DOMINGUEZ SA	Greece	5	0	20	11	9	1	0	0	0	0	3.35976	0.538884	0.215795	0.26461	0.101199	0.166667	-1.04949	9.8	0.269531	3.66	7.04548	3.02284	22.5744	1	0	0	19
ADOLFO DOMINGUEZ SA	The Netherlands	5	0	23	15	8	1	0	0	0	0	3.17633	0.566689	0.663452	0.26461	0.0980731	0	-1.29153	4.7	6.98972	1.13	7.21272	3.02284	22.5744	1	0	0	19
ADOLFO DOMINGUEZ SA	Hungary	5	0	20	12	8	1	0	0	0	0	3.29217	1.2511	0.147629	0.52605	0.00651064	0	-1.29153	7.2	6.0699	4.25	7.00376	3.02284	22.5744	1	0	0	19
ADOLFO DOMINGUEZ SA	India	5	0	18	11	7	1	0	0	0	0	3.88339	2.24326	1.22135	0.26461	0.405146	0.333333	1.26844	4.4	0.818883	9.23	9.03925	3.02284	22.5744	1	0	0	19
ADOLFO DOMINGUEZ SA	Ireland	5	0	19	7	12	1	0	0	0	0	3.18256	0.764228	0.019023	0.26461	0.0741923	0.666667	-1.55102	4.3	-11.284	5.5	6.619	3.02284	22.5744	1	0	0	19
ADOLFO DOMINGUEZ SA	Iceland	5	0	2	2	0	1	0	0	0	0	3.47432	0.957051	0.692716	0.26461	0.110148	0.666667	-1.04949	2.6	14.7276	5.53	5.47239	3.02284	22.5744	1	0	0	19
ADOLFO DOMINGUEZ SA	Israel	5	1	9	4	5	1	0	0	0	0	3.54353	1.46344	0.103381	-0.21367	0.110461	0	1.01767	9	4.52632	5.17	6.84033	3.02284	22.5744	1	0	0	19
ADOLFO DOMINGUEZ SA	Italy	5	0	65	33	32	1	0	0	0	0	3.12249	0.419623	0.297329	-0.25827	0.00573603	0.25	-1.29153	7.7	1.13309	-3.56	7.76795	3.02284	22.5744	1	0	0	19
ADOLFO DOMINGUEZ SA	Japan	5	1	15	10	5	1	0	0	0	0	4.02876	0.661939	0.887715	0.52605	0.0207448	0.416667	1.26844	4.4	0.0612047	2.6	8.10644	3.02284	22.5744	1	0	0	19
ADOLFO DOMINGUEZ SA	Latvia	5	0	3	2	1	1	0	0	0	0	3.43418	0.923385	0.149979	0.26461	0.312954	0.416667	-1.03204	8.9	3.9397	10.6	6.36182	3.02284	22.5744	1	0	0	19
ADOLFO DOMINGUEZ SA	Lithuania	5	0	2	2	0	1	0	0	0	0	3.41598	0.941538	0.270507	0.26461	0.206518	0.25	-1.29153	8.3	3.93337	7.56	6.5333	3.02284	22.5744	1	0	0	19
ADOLFO DOMINGUEZ SA	Luxembourg	5	1	8	6	2	1	0	0	0	0	3.11354	1.69208	0.929135	-0.25827	0.11085	0.166667	-1.55102	4.5	10.1045	4.03	5.65964	3.02284	22.5744	1	0	0	19
ADOLFO DOMINGUEZ SA	Malta	5	0	3	2	1	1	0	0	0	0	3.20679	1.13972	0.366184	0.52605	0.130339	0.333333	-1.55102	7.3	10.5646	2.49	5.60584	3.02284	22.5744	1	0	0	19
ADOLFO DOMINGUEZ SA	Morocco	5	1	40	20	20	1	0	0	0	0	2.94765	2.40856	0.965929	0.52605	1.13327	0.166667	1.27716	11	5.6818	1.72	7.47918	3.02284	22.5744	1	0	0	19
ADOLFO DOMINGUEZ SA	Mexico	5	1	68	26	42	1	0	0	0	0	3.96116	1.61593	0.61242	-3.86767	0.803904	0.333333	-1.55102	3.5	2.35186	2.8	8.01321	3.02284	22.5744	1	0	0	19
ADOLFO DOMINGUEZ SA	Nigeria	5	0	2	1	1	1	0	0	0	0	3.5664	2.38172	1.08093	0.26461	1.74765	0.666667	-0.530518	5.6	3.50758	6.1	8.15031	3.02284	22.5744	1	0	0	19
ADOLFO DOMINGUEZ SA	Norway	5	0	10	8	2	1	0	0	0	0	3.39007	0.558513	0.773884	0.26461	0.110833	0.166667	-1.04949	4.6	1.15494	2.26	6.66495	3.02284	22.5744	1	0	0	19
ADOLFO DOMINGUEZ SA	New Zealand	5	0	2	2	0	1	0	0	0	0	4.2904	0.485975	0.553697	0.26461	0.0975475	0.666667	-0.790003	3.8	1.46672	1.9	6.61267	3.02284	22.5744	1	0	0	19
ADOLFO DOMINGUEZ SA	Panama	5	1	24	7	17	1	0	0	0	0	3.91924	1.43673	0.720964	-3.38939	0.445543	0.666667	-1.29153	9.8	4.37245	6.91	6.5094	3.02284	22.5744	1	0	0	19
ADOLFO DOMINGUEZ SA	Peru	5	0	33	8	25	1	0	0	0	0	3.97657	1.42631	0.798443	-3.38939	0.983327	0.666667	-1.55102	5.2	3.2493	6.45	7.44667	3.02284	22.5744	1	0	0	19
ADOLFO DOMINGUEZ SA	Poland	5	0	53	27	26	1	0	0	0	0	3.33558	1.19959	0.38872	0.26461	0.0799061	0.25	-1.29153	17.7	2.54782	3.55	7.58167	3.02284	22.5744	1	0	0	19
ADOLFO DOMINGUEZ SA	Portugal	5	1	102	38	64	1	0	0	0	0	2.8324	0.769779	0.315828	-0.25827	0.0980653	0.166667	-1.29153	7.6	1.69826	0.37	7.02323	3.02284	22.5744	1	0	0	19
ADOLFO DOMINGUEZ SA	UK	5	1	68	27	41	1	0	0	0	0	3.15698	0.805554	0.679132	0.26461	0.00306242	0.5	-0.790003	4.7	7.47323	1.82	7.77979	3.02284	22.5744	1	0	0	19
ADOLFO DOMINGUEZ SA	Czech Republic	5	0	28	18	10	1	0	0	0	0	3.26204	0.685613	0.00167352	0.26461	0.00949857	0.666667	-1.03204	7.9	8.86508	6.08	7.01005	3.02284	22.5744	1	0	0	19
ADOLFO DOMINGUEZ SA	Romania	5	0	20	9	11	1	0	0	0	0	3.37913	1.01845	0.52496	-0.25827	0.348609	0.5	-0.790003	7.2	6.46266	4.1	7.33514	3.02284	22.5744	1	0	0	19
ADOLFO DOMINGUEZ SA	Rusia	5	1	24	16	8	1	0	0	0	0	3.62123	0.696054	0.111071	0.26461	0.792843	0.666667	-0.790003	7.1	1.90974	6.4	8.15568	3.02284	22.5744	1	0	0	19
ADOLFO DOMINGUEZ SA	Serbia	5	0	7	4	3	1	0	0	0	0	3.30011	1.33787	0.652569	0.26461	1.71416	0.333333	-0.790003	20.8	5.64939	4.68	6.90656	3.02284	22.5744	1	0	0	19
ADOLFO DOMINGUEZ SA	Singapur	5	0	13	10	3	1	0	0	0	0	4.05448	1.4349	0.479333	0.26461	1.00484	0.666667	1.00895	4.1	17.2101	6.62	6.63767	3.02284	22.5744	1	0	0	19
ADOLFO DOMINGUEZ SA	South Africa	5	0	14	6	8	1	0	0	0	0	3.91822	1.72008	0.6954	0.26461	0.167296	0	-0.790003	23.8	2.63118	5.1	7.67106	3.02284	22.5744	1	0	0	19
ADOLFO DOMINGUEZ SA	Sweden	5	0	15	9	6	1	0	0	0	0	3.3956	0.90496	0.81257	0.26461	0.108496	0	-0.790003	7.7	3.74326	2.7	6.9554	3.02284	22.5744	1	0	0	19
ADOLFO DOMINGUEZ SA	Switzerland	5	0	18	8	10	1	0	0	0	0	3.91415	0.836495	0.694867	-0.21367	0.150978	0.166667	-1.55102	4.4	1.57889	1.9	6.8714	3.02284	22.5744	1	0	0	19
ADOLFO DOMINGUEZ SA	Thailand	5	0	14	10	4	1	0	0	0	0	4.00637	1.44759	1.08846	0.52605	0.353899	0.666667	1.26844	1.3	2.09225	4.49	7.80776	3.02284	22.5744	1	0	0	19
ADOLFO DOMINGUEZ SA	Turquia	5	0	18	13	5	1	0	0	0	0	3.47222	1.60088	0.7561	0.52605	0.628774	0.666667	1.27716	10.6	2.66423	7.38	7.85772	3.02284	22.5744	1	0	0	19
ADOLFO DOMINGUEZ SA	Uruguay	5	0	23	7	16	1	0	0	0	0	3.99607	1.1487	0.233146	-3.86767	0.14597	0.666667	-1.29153	12.2	3.61146	6.56	6.51927	3.02284	22.5744	1	0	0	19
ADOLFO DOMINGUEZ SA	Venezuela	5	0	31	11	20	1	0	0	0	0	3.8557	1.76796	0.336214	-3.86767	0.309872	0.166667	-1.55102	11.4	2.04181	10.33	7.42451	3.02284	22.5744	1	0	0	19
AGENCIA EFE SA	Germany	6	1	56	9	47	0	0	0	0	0	3.21148	0.536164	0.562607	0.26461	0.0541978	0.666667	-1.29153	11.1	1.16865	0.96	7.91629	2.97978	-104.449	0	0	0	39
AGENCIA EFE SA	Argentina	6	1	61	18	43	0	0	0	0	0	4.00345	1.28036	0.249754	-3.86767	0.279269	0.666667	-1.55102	10.6	2.54485	9.18	7.58824	2.97978	-104.449	0	0	0	39
AGENCIA EFE SA	Australia	6	0	18	0	18	0	0	0	0	0	4.23231	0.567562	0.721527	0.26461	0.165512	0	-1.29153	5	-4.71452	2.8	7.30812	2.97978	-104.449	0	0	0	39
AGENCIA EFE SA	Austria	6	1	13	3	10	0	0	0	0	0	3.23123	0.588788	0.518591	0.26461	0.0931028	0.333333	-1.55102	5.2	2.91401	1.8	6.91557	2.97978	-104.449	0	0	0	39
AGENCIA EFE SA	Bangladesh	6	0	2	1	1	0	0	0	0	0	3.93561	2.63734	1.3076	0.26461	0.590559	0.333333	1.27716	4.3	1.15269	5.96	8.15174	2.97978	-104.449	0	0	0	39
AGENCIA EFE SA	Belgium	6	1	38	12	26	0	0	0	0	0	3.13244	0.777357	0.634216	-0.25827	0.130961	0.666667	-1.29153	8.4	6.38874	1.25	7.02031	2.97978	-104.449	0	0	0	39
AGENCIA EFE SA	Brasil	6	1	53	11	42	0	0	0	0	0	3.89327	1.91931	0.602092	-0.25827	0.406583	0.25	-1.55102	9.3	1.70724	2.94	8.27046	2.97978	-104.449	0	0	0	39
AGENCIA EFE SA	Bulgaria	6	0	13	2	11	0	0	0	0	0	3.36942	1.12444	0.190378	0.26461	0.191694	0.5	-0.790003	10.1	8.1765	6.25	6.88874	2.97978	-104.449	0	0	0	39
AGENCIA EFE SA	Canada	6	0	23	2	21	0	0	0	0	0	3.81425	0.103029	0.79255	-0.25827	0.161496	0.166667	-1.29153	6.7	3.0366	2.9	7.50919	2.97978	-104.449	0	0	0	39
AGENCIA EFE SA	Chile	6	1	49	12	37	0	0	0	0	0	4.03132	1.48778	0.490568	-3.86767	0.146208	0.416667	-1.55102	8	5.60687	5.71	7.21206	2.97978	-104.449	0	0	0	39
AGENCIA EFE SA	China	6	1	44	6	38	0	0	0	0	0	3.98191	1.90078	1.11489	0.52605	1.8939	0.333333	1.26844	4.2	3.22686	10.2	9.11544	2.97978	-104.449	0	0	0	39
AGENCIA EFE SA	Colombia	6	1	33	12	21	0	0	0	0	0	3.90663	1.54759	0.748636	-3.86767	0.629637	0.166667	-1.55102	12	8.29023	4.72	7.65269	2.97978	-104.449	0	0	0	39
AGENCIA EFE SA	South Korea	6	0	10	0	10	0	0	0	0	0	4.00439	0.420141	0.172921	0.52605	0.19628	0.541667	-0.271032	3.7	0.900652	4.2	7.68389	2.97978	-104.449	0	0	0	39
AGENCIA EFE SA	Costa Rica	6	1	15	6	9	0	0	0	0	0	3.93278	1.54875	0.662422	-3.86767	0.00206424	0	-1.55102	6.6	3.26941	5.91	6.63621	2.97978	-104.449	0	0	0	39
AGENCIA EFE SA	Croacia	6	0	8	1	7	0	0	0	0	0	3.22565	1.27885	0.253946	0.26461	1.01215	0.666667	-1.55102	12.6	4.3578	4.28	6.64771	2.97978	-104.449	0	0	0	39
AGENCIA EFE SA	Denmark	6	0	10	1	9	0	0	0	0	0	3.31418	0.590138	0.733766	0.26461	0.112828	0.166667	-1.04949	4.8	2.05207	3.05	6.73368	2.97978	-104.449	0	0	0	39
AGENCIA EFE SA	Ecuador	6	1	18	5	13	0	0	0	0	0	3.95347	1.61213	0.825643	-3.38939	0.280888	0.133333	-1.55102	7.7	5.24269	4.74	7.12151	2.97978	-104.449	0	0	0	39
AGENCIA EFE SA	El Salvador	6	1	12	2	10	0	0	0	0	0	3.94102	2.12139	0.718083	-3.86767	0.459103	0.666667	-1.55102	7.2	3.05173	2.75	6.83765	2.97978	-104.449	0	0	0	39
AGENCIA EFE SA	Slovakia	6	0	13	1	12	0	0	0	0	0	3.29809	0.931708	0.0511288	0.26461	0.296655	0.333333	-1.29153	16.2	4.02343	6.04	6.73135	2.97978	-104.449	0	0	0	39
AGENCIA EFE SA	Slovenia	6	0	6	0	6	0	0	0	0	0	3.20355	0.40353	0.182051	0.26461	0.101477	0.333333	-1.29153	6.5	1.4438	4.03	6.30114	2.97978	-104.449	0	0	0	39
AGENCIA EFE SA	USA	6	1	74	13	61	0	0	0	0	0	3.87141	0.553655	1.26073	-0.69195	0.15745	0.166667	-1.29153	5.1	0.800894	3.2	8.47189	2.97978	-104.449	0	0	0	39
AGENCIA EFE SA	Estonia	6	0	3	0	3	0	0	0	0	0	3.46571	0.927963	0.110104	0.26461	0.20986	0.666667	-0.530518	7.9	20.7518	10.47	6.12908	2.97978	-104.449	0	0	0	39
AGENCIA EFE SA	Ethiopia	6	0	2	0	2	0	0	0	0	0	3.72911	2.78128	1.3431	0.26461	1.26883	0.333333	-0.530518	5.4	1.80247	10.2	7.85282	2.97978	-104.449	0	0	0	39
AGENCIA EFE SA	Philippine	6	1	12	2	10	0	0	0	0	0	4.07154	1.53391	0.995918	0.26461	0.359399	0.208333	-1.55102	7.7	1.1508	4.97	7.91936	2.97978	-104.449	0	0	0	39
AGENCIA EFE SA	Finland	6	0	9	2	7	0	0	0	0	0	3.48105	0.507403	0.679478	0.52605	0.114138	0.0833333	-1.04949	8.4	2.36125	2.09	6.71984	2.97978	-104.449	0	0	0	39
AGENCIA EFE SA	France	6	1	80	16	64	0	0	0	0	0	2.98175	0.490732	0.583416	-0.25827	0.0417816	0.333333	-1.29153	8.9	2.98952	1.19	7.78442	2.97978	-104.449	0	0	0	39
AGENCIA EFE SA	Greece	6	0	20	0	20	0	0	0	0	0	3.35976	0.538884	0.215795	0.26461	0.101199	0.166667	-1.04949	9.8	0.269531	3.66	7.04548	2.97978	-104.449	0	0	0	39
AGENCIA EFE SA	The Netherlands	6	0	23	4	19	0	0	0	0	0	3.17633	0.566689	0.663452	0.26461	0.0980731	0	-1.29153	4.7	6.98972	1.13	7.21272	2.97978	-104.449	0	0	0	39
AGENCIA EFE SA	Hungary	6	0	20	3	17	0	0	0	0	0	3.29217	1.2511	0.147629	0.52605	0.00651064	0	-1.29153	7.2	6.0699	4.25	7.00376	2.97978	-104.449	0	0	0	39
AGENCIA EFE SA	India	6	1	18	1	17	0	0	0	0	0	3.88339	2.24326	1.22135	0.26461	0.405146	0.333333	1.26844	4.4	0.818883	9.23	9.03925	2.97978	-104.449	0	0	0	39
AGENCIA EFE SA	Ireland	6	0	19	1	18	0	0	0	0	0	3.18256	0.764228	0.019023	0.26461	0.0741923	0.666667	-1.55102	4.3	-11.284	5.5	6.619	2.97978	-104.449	0	0	0	39
AGENCIA EFE SA	Iceland	6	0	2	0	2	0	0	0	0	0	3.47432	0.957051	0.692716	0.26461	0.110148	0.666667	-1.04949	2.6	14.7276	5.53	5.47239	2.97978	-104.449	0	0	0	39
AGENCIA EFE SA	Israel	6	1	9	2	7	0	0	0	0	0	3.54353	1.46344	0.103381	-0.21367	0.110461	0	1.01767	9	4.52632	5.17	6.84033	2.97978	-104.449	0	0	0	39
AGENCIA EFE SA	Italy	6	1	65	13	52	0	0	0	0	0	3.12249	0.419623	0.297329	-0.25827	0.00573603	0.25	-1.29153	7.7	1.13309	-3.56	7.76795	2.97978	-104.449	0	0	0	39
AGENCIA EFE SA	Japan	6	1	15	1	14	0	0	0	0	0	4.02876	0.661939	0.887715	0.52605	0.0207448	0.416667	1.26844	4.4	0.0612047	2.6	8.10644	2.97978	-104.449	0	0	0	39
AGENCIA EFE SA	Latvia	6	0	3	0	3	0	0	0	0	0	3.43418	0.923385	0.149979	0.26461	0.312954	0.416667	-1.03204	8.9	3.9397	10.6	6.36182	2.97978	-104.449	0	0	0	39
AGENCIA EFE SA	Lithuania	6	0	2	0	2	0	0	0	0	0	3.41598	0.941538	0.270507	0.26461	0.206518	0.25	-1.29153	8.3	3.93337	7.56	6.5333	2.97978	-104.449	0	0	0	39
AGENCIA EFE SA	Luxembourg	6	0	8	1	7	0	0	0	0	0	3.11354	1.69208	0.929135	-0.25827	0.11085	0.166667	-1.55102	4.5	10.1045	4.03	5.65964	2.97978	-104.449	0	0	0	39
AGENCIA EFE SA	Malta	6	0	3	1	2	0	0	0	0	0	3.20679	1.13972	0.366184	0.52605	0.130339	0.333333	-1.55102	7.3	10.5646	2.49	5.60584	2.97978	-104.449	0	0	0	39
AGENCIA EFE SA	Morocco	6	1	40	6	34	0	0	0	0	0	2.94765	2.40856	0.965929	0.52605	1.13327	0.166667	1.27716	11	5.6818	1.72	7.47918	2.97978	-104.449	0	0	0	39
AGENCIA EFE SA	Mexico	6	1	68	17	51	0	0	0	0	0	3.96116	1.61593	0.61242	-3.86767	0.803904	0.333333	-1.55102	3.5	2.35186	2.8	8.01321	2.97978	-104.449	0	0	0	39
AGENCIA EFE SA	Nigeria	6	0	2	0	2	0	0	0	0	0	3.5664	2.38172	1.08093	0.26461	1.74765	0.666667	-0.530518	5.6	3.50758	6.1	8.15031	2.97978	-104.449	0	0	0	39
AGENCIA EFE SA	Norway	6	0	10	1	9	0	0	0	0	0	3.39007	0.558513	0.773884	0.26461	0.110833	0.166667	-1.04949	4.6	1.15494	2.26	6.66495	2.97978	-104.449	0	0	0	39
AGENCIA EFE SA	New Zealand	6	0	2	0	2	0	0	0	0	0	4.2904	0.485975	0.553697	0.26461	0.0975475	0.666667	-0.790003	3.8	1.46672	1.9	6.61267	2.97978	-104.449	0	0	0	39
AGENCIA EFE SA	Panama	6	1	24	6	18	0	0	0	0	0	3.91924	1.43673	0.720964	-3.38939	0.445543	0.666667	-1.29153	9.8	4.37245	6.91	6.5094	2.97978	-104.449	0	0	0	39
AGENCIA EFE SA	Peru	6	1	33	11	22	0	0	0	0	0	3.97657	1.42631	0.798443	-3.38939	0.983327	0.666667	-1.55102	5.2	3.2493	6.45	7.44667	2.97978	-104.449	0	0	0	39
AGENCIA EFE SA	Poland	6	0	53	5	48	0	0	0	0	0	3.33558	1.19959	0.38872	0.26461	0.0799061	0.25	-1.29153	17.7	2.54782	3.55	7.58167	2.97978	-104.449	0	0	0	39
AGENCIA EFE SA	Portugal	6	1	102	24	78	0	0	0	0	0	2.8324	0.769779	0.315828	-0.25827	0.0980653	0.166667	-1.29153	7.6	1.69826	0.37	7.02323	2.97978	-104.449	0	0	0	39
AGENCIA EFE SA	UK	6	1	68	16	52	0	0	0	0	0	3.15698	0.805554	0.679132	0.26461	0.00306242	0.5	-0.790003	4.7	7.47323	1.82	7.77979	2.97978	-104.449	0	0	0	39
AGENCIA EFE SA	Czech Republic	6	0	28	3	25	0	0	0	0	0	3.26204	0.685613	0.00167352	0.26461	0.00949857	0.666667	-1.03204	7.9	8.86508	6.08	7.01005	2.97978	-104.449	0	0	0	39
AGENCIA EFE SA	Romania	6	0	20	4	16	0	0	0	0	0	3.37913	1.01845	0.52496	-0.25827	0.348609	0.5	-0.790003	7.2	6.46266	4.1	7.33514	2.97978	-104.449	0	0	0	39
AGENCIA EFE SA	Rusia	6	1	24	2	22	0	0	0	0	0	3.62123	0.696054	0.111071	0.26461	0.792843	0.666667	-0.790003	7.1	1.90974	6.4	8.15568	2.97978	-104.449	0	0	0	39
AGENCIA EFE SA	Serbia	6	0	7	0	7	0	0	0	0	0	3.30011	1.33787	0.652569	0.26461	1.71416	0.333333	-0.790003	20.8	5.64939	4.68	6.90656	2.97978	-104.449	0	0	0	39
AGENCIA EFE SA	Singapur	6	0	13	2	11	0	0	0	0	0	4.05448	1.4349	0.479333	0.26461	1.00484	0.666667	1.00895	4.1	17.2101	6.62	6.63767	2.97978	-104.449	0	0	0	39
AGENCIA EFE SA	South Africa	6	1	14	3	11	0	0	0	0	0	3.91822	1.72008	0.6954	0.26461	0.167296	0	-0.790003	23.8	2.63118	5.1	7.67106	2.97978	-104.449	0	0	0	39
AGENCIA EFE SA	Sweden	6	0	15	2	13	0	0	0	0	0	3.3956	0.90496	0.81257	0.26461	0.108496	0	-0.790003	7.7	3.74326	2.7	6.9554	2.97978	-104.449	0	0	0	39
AGENCIA EFE SA	Switzerland	6	1	18	5	13	0	0	0	0	0	3.91415	0.836495	0.694867	-0.21367	0.150978	0.166667	-1.55102	4.4	1.57889	1.9	6.8714	2.97978	-104.449	0	0	0	39
AGENCIA EFE SA	Thailand	6	0	14	2	12	0	0	0	0	0	4.00637	1.44759	1.08846	0.52605	0.353899	0.666667	1.26844	1.3	2.09225	4.49	7.80776	2.97978	-104.449	0	0	0	39
AGENCIA EFE SA	Turquia	6	0	18	1	17	0	0	0	0	0	3.47222	1.60088	0.7561	0.52605	0.628774	0.666667	1.27716	10.6	2.66423	7.38	7.85772	2.97978	-104.449	0	0	0	39
AGENCIA EFE SA	Uruguay	6	1	23	9	14	0	0	0	0	0	3.99607	1.1487	0.233146	-3.86767	0.14597	0.666667	-1.29153	12.2	3.61146	6.56	6.51927	2.97978	-104.449	0	0	0	39
AGENCIA EFE SA	Venezuela	6	1	31	9	22	0	0	0	0	0	3.8557	1.76796	0.336214	-3.86767	0.309872	0.166667	-1.55102	11.4	2.04181	10.33	7.42451	2.97978	-104.449	0	0	0	39
ALTADIS SA	Germany	7	0	56	29	27	1	0	0	0	0	3.21148	0.536164	0.562607	0.26461	0.0541978	0.666667	-1.29153	11.1	1.16865	0.96	7.91629	4.3347	50.2829	1	0	0	14
ALTADIS SA	Argentina	7	0	61	22	39	1	0	0	0	0	4.00345	1.28036	0.249754	-3.86767	0.279269	0.666667	-1.55102	10.6	2.54485	9.18	7.58824	4.3347	50.2829	1	0	0	14
ALTADIS SA	Australia	7	0	18	12	6	1	0	0	0	0	4.23231	0.567562	0.721527	0.26461	0.165512	0	-1.29153	5	-4.71452	2.8	7.30812	4.3347	50.2829	1	0	0	14
ALTADIS SA	Austria	7	0	13	10	3	1	0	0	0	0	3.23123	0.588788	0.518591	0.26461	0.0931028	0.333333	-1.55102	5.2	2.91401	1.8	6.91557	4.3347	50.2829	1	0	0	14
ALTADIS SA	Bangladesh	7	0	2	1	1	1	0	0	0	0	3.93561	2.63734	1.3076	0.26461	0.590559	0.333333	1.27716	4.3	1.15269	5.96	8.15174	4.3347	50.2829	1	0	0	14
ALTADIS SA	Belgium	7	1	38	15	23	1	0	0	0	0	3.13244	0.777357	0.634216	-0.25827	0.130961	0.666667	-1.29153	8.4	6.38874	1.25	7.02031	4.3347	50.2829	1	0	0	14
ALTADIS SA	Brasil	7	0	53	24	29	1	0	0	0	0	3.89327	1.91931	0.602092	-0.25827	0.406583	0.25	-1.55102	9.3	1.70724	2.94	8.27046	4.3347	50.2829	1	0	0	14
ALTADIS SA	Bulgaria	7	0	13	5	8	1	0	0	0	0	3.36942	1.12444	0.190378	0.26461	0.191694	0.5	-0.790003	10.1	8.1765	6.25	6.88874	4.3347	50.2829	1	0	0	14
ALTADIS SA	Canada	7	0	23	11	12	1	0	0	0	0	3.81425	0.103029	0.79255	-0.25827	0.161496	0.166667	-1.29153	6.7	3.0366	2.9	7.50919	4.3347	50.2829	1	0	0	14
ALTADIS SA	Chile	7	0	49	17	32	1	0	0	0	0	4.03132	1.48778	0.490568	-3.86767	0.146208	0.416667	-1.55102	8	5.60687	5.71	7.21206	4.3347	50.2829	1	0	0	14
ALTADIS SA	China	7	0	44	28	16	1	0	0	0	0	3.98191	1.90078	1.11489	0.52605	1.8939	0.333333	1.26844	4.2	3.22686	10.2	9.11544	4.3347	50.2829	1	0	0	14
ALTADIS SA	Colombia	7	0	33	7	26	1	0	0	0	0	3.90663	1.54759	0.748636	-3.86767	0.629637	0.166667	-1.55102	12	8.29023	4.72	7.65269	4.3347	50.2829	1	0	0	14
ALTADIS SA	South Korea	7	0	10	9	1	1	0	0	0	0	4.00439	0.420141	0.172921	0.52605	0.19628	0.541667	-0.271032	3.7	0.900652	4.2	7.68389	4.3347	50.2829	1	0	0	14
ALTADIS SA	Costa Rica	7	0	15	4	11	1	0	0	0	0	3.93278	1.54875	0.662422	-3.86767	0.00206424	0	-1.55102	6.6	3.26941	5.91	6.63621	4.3347	50.2829	1	0	0	14
ALTADIS SA	Croacia	7	0	8	5	3	1	0	0	0	0	3.22565	1.27885	0.253946	0.26461	1.01215	0.666667	-1.55102	12.6	4.3578	4.28	6.64771	4.3347	50.2829	1	0	0	14
ALTADIS SA	Denmark	7	0	10	6	4	1	0	0	0	0	3.31418	0.590138	0.733766	0.26461	0.112828	0.166667	-1.04949	4.8	2.05207	3.05	6.73368	4.3347	50.2829	1	0	0	14
ALTADIS SA	Ecuador	7	0	18	4	14	1	0	0	0	0	3.95347	1.61213	0.825643	-3.38939	0.280888	0.133333	-1.55102	7.7	5.24269	4.74	7.12151	4.3347	50.2829	1	0	0	14
ALTADIS SA	El Salvador	7	0	12	4	8	1	0	0	0	0	3.94102	2.12139	0.718083	-3.86767	0.459103	0.666667	-1.55102	7.2	3.05173	2.75	6.83765	4.3347	50.2829	1	0	0	14
ALTADIS SA	Slovakia	7	0	13	9	4	1	0	0	0	0	3.29809	0.931708	0.0511288	0.26461	0.296655	0.333333	-1.29153	16.2	4.02343	6.04	6.73135	4.3347	50.2829	1	0	0	14
ALTADIS SA	Slovenia	7	0	6	5	1	1	0	0	0	0	3.20355	0.40353	0.182051	0.26461	0.101477	0.333333	-1.29153	6.5	1.4438	4.03	6.30114	4.3347	50.2829	1	0	0	14
ALTADIS SA	USA	7	1	74	32	42	1	0	0	0	0	3.87141	0.553655	1.26073	-0.69195	0.15745	0.166667	-1.29153	5.1	0.800894	3.2	8.47189	4.3347	50.2829	1	0	0	14
ALTADIS SA	Estonia	7	0	3	2	1	1	0	0	0	0	3.46571	0.927963	0.110104	0.26461	0.20986	0.666667	-0.530518	7.9	20.7518	10.47	6.12908	4.3347	50.2829	1	0	0	14
ALTADIS SA	Ethiopia	7	0	2	0	2	1	0	0	0	0	3.72911	2.78128	1.3431	0.26461	1.26883	0.333333	-0.530518	5.4	1.80247	10.2	7.85282	4.3347	50.2829	1	0	0	14
ALTADIS SA	Philippine	7	1	12	8	4	1	0	0	0	0	4.07154	1.53391	0.995918	0.26461	0.359399	0.208333	-1.55102	7.7	1.1508	4.97	7.91936	4.3347	50.2829	1	0	0	14
ALTADIS SA	Finland	7	1	9	5	4	1	0	0	0	0	3.48105	0.507403	0.679478	0.52605	0.114138	0.0833333	-1.04949	8.4	2.36125	2.09	6.71984	4.3347	50.2829	1	0	0	14
ALTADIS SA	France	7	1	80	38	42	1	0	0	0	0	2.98175	0.490732	0.583416	-0.25827	0.0417816	0.333333	-1.29153	8.9	2.98952	1.19	7.78442	4.3347	50.2829	1	0	0	14
ALTADIS SA	Greece	7	0	20	11	9	1	0	0	0	0	3.35976	0.538884	0.215795	0.26461	0.101199	0.166667	-1.04949	9.8	0.269531	3.66	7.04548	4.3347	50.2829	1	0	0	14
ALTADIS SA	The Netherlands	7	0	23	15	8	1	0	0	0	0	3.17633	0.566689	0.663452	0.26461	0.0980731	0	-1.29153	4.7	6.98972	1.13	7.21272	4.3347	50.2829	1	0	0	14
ALTADIS SA	Hungary	7	0	20	12	8	1	0	0	0	0	3.29217	1.2511	0.147629	0.52605	0.00651064	0	-1.29153	7.2	6.0699	4.25	7.00376	4.3347	50.2829	1	0	0	14
ALTADIS SA	India	7	0	18	11	7	1	0	0	0	0	3.88339	2.24326	1.22135	0.26461	0.405146	0.333333	1.26844	4.4	0.818883	9.23	9.03925	4.3347	50.2829	1	0	0	14
ALTADIS SA	Ireland	7	0	19	7	12	1	0	0	0	0	3.18256	0.764228	0.019023	0.26461	0.0741923	0.666667	-1.55102	4.3	-11.284	5.5	6.619	4.3347	50.2829	1	0	0	14
ALTADIS SA	Iceland	7	0	2	2	0	1	0	0	0	0	3.47432	0.957051	0.692716	0.26461	0.110148	0.666667	-1.04949	2.6	14.7276	5.53	5.47239	4.3347	50.2829	1	0	0	14
ALTADIS SA	Israel	7	0	9	4	5	1	0	0	0	0	3.54353	1.46344	0.103381	-0.21367	0.110461	0	1.01767	9	4.52632	5.17	6.84033	4.3347	50.2829	1	0	0	14
ALTADIS SA	Italy	7	1	65	33	32	1	0	0	0	0	3.12249	0.419623	0.297329	-0.25827	0.00573603	0.25	-1.29153	7.7	1.13309	-3.56	7.76795	4.3347	50.2829	1	0	0	14
ALTADIS SA	Japan	7	0	15	10	5	1	0	0	0	0	4.02876	0.661939	0.887715	0.52605	0.0207448	0.416667	1.26844	4.4	0.0612047	2.6	8.10644	4.3347	50.2829	1	0	0	14
ALTADIS SA	Latvia	7	0	3	2	1	1	0	0	0	0	3.43418	0.923385	0.149979	0.26461	0.312954	0.416667	-1.03204	8.9	3.9397	10.6	6.36182	4.3347	50.2829	1	0	0	14
ALTADIS SA	Lithuania	7	0	2	2	0	1	0	0	0	0	3.41598	0.941538	0.270507	0.26461	0.206518	0.25	-1.29153	8.3	3.93337	7.56	6.5333	4.3347	50.2829	1	0	0	14
ALTADIS SA	Luxembourg	7	1	8	6	2	1	0	0	0	0	3.11354	1.69208	0.929135	-0.25827	0.11085	0.166667	-1.55102	4.5	10.1045	4.03	5.65964	4.3347	50.2829	1	0	0	14
ALTADIS SA	Malta	7	0	3	2	1	1	0	0	0	0	3.20679	1.13972	0.366184	0.52605	0.130339	0.333333	-1.55102	7.3	10.5646	2.49	5.60584	4.3347	50.2829	1	0	0	14
ALTADIS SA	Morocco	7	1	40	20	20	1	0	0	0	0	2.94765	2.40856	0.965929	0.52605	1.13327	0.166667	1.27716	11	5.6818	1.72	7.47918	4.3347	50.2829	1	0	0	14
ALTADIS SA	Mexico	7	0	68	26	42	1	0	0	0	0	3.96116	1.61593	0.61242	-3.86767	0.803904	0.333333	-1.55102	3.5	2.35186	2.8	8.01321	4.3347	50.2829	1	0	0	14
ALTADIS SA	Nigeria	7	0	2	1	1	1	0	0	0	0	3.5664	2.38172	1.08093	0.26461	1.74765	0.666667	-0.530518	5.6	3.50758	6.1	8.15031	4.3347	50.2829	1	0	0	14
ALTADIS SA	Norway	7	0	10	8	2	1	0	0	0	0	3.39007	0.558513	0.773884	0.26461	0.110833	0.166667	-1.04949	4.6	1.15494	2.26	6.66495	4.3347	50.2829	1	0	0	14
ALTADIS SA	New Zealand	7	0	2	2	0	1	0	0	0	0	4.2904	0.485975	0.553697	0.26461	0.0975475	0.666667	-0.790003	3.8	1.46672	1.9	6.61267	4.3347	50.2829	1	0	0	14
ALTADIS SA	Panama	7	0	24	7	17	1	0	0	0	0	3.91924	1.43673	0.720964	-3.38939	0.445543	0.666667	-1.29153	9.8	4.37245	6.91	6.5094	4.3347	50.2829	1	0	0	14
ALTADIS SA	Peru	7	0	33	8	25	1	0	0	0	0	3.97657	1.42631	0.798443	-3.38939	0.983327	0.666667	-1.55102	5.2	3.2493	6.45	7.44667	4.3347	50.2829	1	0	0	14
ALTADIS SA	Poland	7	1	53	27	26	1	0	0	0	0	3.33558	1.19959	0.38872	0.26461	0.0799061	0.25	-1.29153	17.7	2.54782	3.55	7.58167	4.3347	50.2829	1	0	0	14
ALTADIS SA	Portugal	7	0	102	38	64	1	0	0	0	0	2.8324	0.769779	0.315828	-0.25827	0.0980653	0.166667	-1.29153	7.6	1.69826	0.37	7.02323	4.3347	50.2829	1	0	0	14
ALTADIS SA	UK	7	0	68	27	41	1	0	0	0	0	3.15698	0.805554	0.679132	0.26461	0.00306242	0.5	-0.790003	4.7	7.47323	1.82	7.77979	4.3347	50.2829	1	0	0	14
ALTADIS SA	Czech Republic	7	0	28	18	10	1	0	0	0	0	3.26204	0.685613	0.00167352	0.26461	0.00949857	0.666667	-1.03204	7.9	8.86508	6.08	7.01005	4.3347	50.2829	1	0	0	14
ALTADIS SA	Romania	7	0	20	9	11	1	0	0	0	0	3.37913	1.01845	0.52496	-0.25827	0.348609	0.5	-0.790003	7.2	6.46266	4.1	7.33514	4.3347	50.2829	1	0	0	14
ALTADIS SA	Rusia	7	1	24	16	8	1	0	0	0	0	3.62123	0.696054	0.111071	0.26461	0.792843	0.666667	-0.790003	7.1	1.90974	6.4	8.15568	4.3347	50.2829	1	0	0	14
ALTADIS SA	Serbia	7	0	7	4	3	1	0	0	0	0	3.30011	1.33787	0.652569	0.26461	1.71416	0.333333	-0.790003	20.8	5.64939	4.68	6.90656	4.3347	50.2829	1	0	0	14
ALTADIS SA	Singapur	7	0	13	10	3	1	0	0	0	0	4.05448	1.4349	0.479333	0.26461	1.00484	0.666667	1.00895	4.1	17.2101	6.62	6.63767	4.3347	50.2829	1	0	0	14
ALTADIS SA	South Africa	7	0	14	6	8	1	0	0	0	0	3.91822	1.72008	0.6954	0.26461	0.167296	0	-0.790003	23.8	2.63118	5.1	7.67106	4.3347	50.2829	1	0	0	14
ALTADIS SA	Sweden	7	0	15	9	6	1	0	0	0	0	3.3956	0.90496	0.81257	0.26461	0.108496	0	-0.790003	7.7	3.74326	2.7	6.9554	4.3347	50.2829	1	0	0	14
ALTADIS SA	Switzerland	7	0	18	8	10	1	0	0	0	0	3.91415	0.836495	0.694867	-0.21367	0.150978	0.166667	-1.55102	4.4	1.57889	1.9	6.8714	4.3347	50.2829	1	0	0	14
ALTADIS SA	Thailand	7	0	14	10	4	1	0	0	0	0	4.00637	1.44759	1.08846	0.52605	0.353899	0.666667	1.26844	1.3	2.09225	4.49	7.80776	4.3347	50.2829	1	0	0	14
ALTADIS SA	Turquia	7	0	18	13	5	1	0	0	0	0	3.47222	1.60088	0.7561	0.52605	0.628774	0.666667	1.27716	10.6	2.66423	7.38	7.85772	4.3347	50.2829	1	0	0	14
ALTADIS SA	Uruguay	7	0	23	7	16	1	0	0	0	0	3.99607	1.1487	0.233146	-3.86767	0.14597	0.666667	-1.29153	12.2	3.61146	6.56	6.51927	4.3347	50.2829	1	0	0	14
ALTADIS SA	Venezuela	7	0	31	11	20	1	0	0	0	0	3.8557	1.76796	0.336214	-3.86767	0.309872	0.166667	-1.55102	11.4	2.04181	10.33	7.42451	4.3347	50.2829	1	0	0	14
ANGEL IGLESIAS S.A.	Germany	8	1	56	29	27	1	0	0	0	0	3.21148	0.536164	0.562607	0.26461	0.0541978	0.666667	-1.29153	11.1	1.16865	0.96	7.91629	2.76343	3.40711	0	0	0	9
ANGEL IGLESIAS S.A.	Argentina	8	0	61	22	39	1	0	0	0	0	4.00345	1.28036	0.249754	-3.86767	0.279269	0.666667	-1.55102	10.6	2.54485	9.18	7.58824	2.76343	3.40711	0	0	0	9
ANGEL IGLESIAS S.A.	Australia	8	1	18	12	6	1	0	0	0	0	4.23231	0.567562	0.721527	0.26461	0.165512	0	-1.29153	5	-4.71452	2.8	7.30812	2.76343	3.40711	0	0	0	9
ANGEL IGLESIAS S.A.	Austria	8	0	13	10	3	1	0	0	0	0	3.23123	0.588788	0.518591	0.26461	0.0931028	0.333333	-1.55102	5.2	2.91401	1.8	6.91557	2.76343	3.40711	0	0	0	9
ANGEL IGLESIAS S.A.	Bangladesh	8	0	2	1	1	1	0	0	0	0	3.93561	2.63734	1.3076	0.26461	0.590559	0.333333	1.27716	4.3	1.15269	5.96	8.15174	2.76343	3.40711	0	0	0	9
ANGEL IGLESIAS S.A.	Belgium	8	0	38	15	23	1	0	0	0	0	3.13244	0.777357	0.634216	-0.25827	0.130961	0.666667	-1.29153	8.4	6.38874	1.25	7.02031	2.76343	3.40711	0	0	0	9
ANGEL IGLESIAS S.A.	Brasil	8	0	53	24	29	1	0	0	0	0	3.89327	1.91931	0.602092	-0.25827	0.406583	0.25	-1.55102	9.3	1.70724	2.94	8.27046	2.76343	3.40711	0	0	0	9
ANGEL IGLESIAS S.A.	Bulgaria	8	0	13	5	8	1	0	0	0	0	3.36942	1.12444	0.190378	0.26461	0.191694	0.5	-0.790003	10.1	8.1765	6.25	6.88874	2.76343	3.40711	0	0	0	9
ANGEL IGLESIAS S.A.	Canada	8	0	23	11	12	1	0	0	0	0	3.81425	0.103029	0.79255	-0.25827	0.161496	0.166667	-1.29153	6.7	3.0366	2.9	7.50919	2.76343	3.40711	0	0	0	9
ANGEL IGLESIAS S.A.	Chile	8	1	49	17	32	1	0	0	0	0	4.03132	1.48778	0.490568	-3.86767	0.146208	0.416667	-1.55102	8	5.60687	5.71	7.21206	2.76343	3.40711	0	0	0	9
ANGEL IGLESIAS S.A.	China	8	0	44	28	16	1	0	0	0	0	3.98191	1.90078	1.11489	0.52605	1.8939	0.333333	1.26844	4.2	3.22686	10.2	9.11544	2.76343	3.40711	0	0	0	9
ANGEL IGLESIAS S.A.	Colombia	8	1	33	7	26	1	0	0	0	0	3.90663	1.54759	0.748636	-3.86767	0.629637	0.166667	-1.55102	12	8.29023	4.72	7.65269	2.76343	3.40711	0	0	0	9
ANGEL IGLESIAS S.A.	South Korea	8	0	10	9	1	1	0	0	0	0	4.00439	0.420141	0.172921	0.52605	0.19628	0.541667	-0.271032	3.7	0.900652	4.2	7.68389	2.76343	3.40711	0	0	0	9
ANGEL IGLESIAS S.A.	Costa Rica	8	0	15	4	11	1	0	0	0	0	3.93278	1.54875	0.662422	-3.86767	0.00206424	0	-1.55102	6.6	3.26941	5.91	6.63621	2.76343	3.40711	0	0	0	9
ANGEL IGLESIAS S.A.	Croacia	8	0	8	5	3	1	0	0	0	0	3.22565	1.27885	0.253946	0.26461	1.01215	0.666667	-1.55102	12.6	4.3578	4.28	6.64771	2.76343	3.40711	0	0	0	9
ANGEL IGLESIAS S.A.	Denmark	8	0	10	6	4	1	0	0	0	0	3.31418	0.590138	0.733766	0.26461	0.112828	0.166667	-1.04949	4.8	2.05207	3.05	6.73368	2.76343	3.40711	0	0	0	9
ANGEL IGLESIAS S.A.	Ecuador	8	0	18	4	14	1	0	0	0	0	3.95347	1.61213	0.825643	-3.38939	0.280888	0.133333	-1.55102	7.7	5.24269	4.74	7.12151	2.76343	3.40711	0	0	0	9
ANGEL IGLESIAS S.A.	El Salvador	8	0	12	4	8	1	0	0	0	0	3.94102	2.12139	0.718083	-3.86767	0.459103	0.666667	-1.55102	7.2	3.05173	2.75	6.83765	2.76343	3.40711	0	0	0	9
ANGEL IGLESIAS S.A.	Slovakia	8	0	13	9	4	1	0	0	0	0	3.29809	0.931708	0.0511288	0.26461	0.296655	0.333333	-1.29153	16.2	4.02343	6.04	6.73135	2.76343	3.40711	0	0	0	9
ANGEL IGLESIAS S.A.	Slovenia	8	0	6	5	1	1	0	0	0	0	3.20355	0.40353	0.182051	0.26461	0.101477	0.333333	-1.29153	6.5	1.4438	4.03	6.30114	2.76343	3.40711	0	0	0	9
ANGEL IGLESIAS S.A.	USA	8	0	74	32	42	1	0	0	0	0	3.87141	0.553655	1.26073	-0.69195	0.15745	0.166667	-1.29153	5.1	0.800894	3.2	8.47189	2.76343	3.40711	0	0	0	9
ANGEL IGLESIAS S.A.	Estonia	8	0	3	2	1	1	0	0	0	0	3.46571	0.927963	0.110104	0.26461	0.20986	0.666667	-0.530518	7.9	20.7518	10.47	6.12908	2.76343	3.40711	0	0	0	9
ANGEL IGLESIAS S.A.	Ethiopia	8	0	2	0	2	1	0	0	0	0	3.72911	2.78128	1.3431	0.26461	1.26883	0.333333	-0.530518	5.4	1.80247	10.2	7.85282	2.76343	3.40711	0	0	0	9
ANGEL IGLESIAS S.A.	Philippine	8	0	12	8	4	1	0	0	0	0	4.07154	1.53391	0.995918	0.26461	0.359399	0.208333	-1.55102	7.7	1.1508	4.97	7.91936	2.76343	3.40711	0	0	0	9
ANGEL IGLESIAS S.A.	Finland	8	0	9	5	4	1	0	0	0	0	3.48105	0.507403	0.679478	0.52605	0.114138	0.0833333	-1.04949	8.4	2.36125	2.09	6.71984	2.76343	3.40711	0	0	0	9
ANGEL IGLESIAS S.A.	France	8	1	80	38	42	1	0	0	0	0	2.98175	0.490732	0.583416	-0.25827	0.0417816	0.333333	-1.29153	8.9	2.98952	1.19	7.78442	2.76343	3.40711	0	0	0	9
ANGEL IGLESIAS S.A.	Greece	8	0	20	11	9	1	0	0	0	0	3.35976	0.538884	0.215795	0.26461	0.101199	0.166667	-1.04949	9.8	0.269531	3.66	7.04548	2.76343	3.40711	0	0	0	9
ANGEL IGLESIAS S.A.	The Netherlands	8	0	23	15	8	1	0	0	0	0	3.17633	0.566689	0.663452	0.26461	0.0980731	0	-1.29153	4.7	6.98972	1.13	7.21272	2.76343	3.40711	0	0	0	9
ANGEL IGLESIAS S.A.	Hungary	8	0	20	12	8	1	0	0	0	0	3.29217	1.2511	0.147629	0.52605	0.00651064	0	-1.29153	7.2	6.0699	4.25	7.00376	2.76343	3.40711	0	0	0	9
ANGEL IGLESIAS S.A.	India	8	0	18	11	7	1	0	0	0	0	3.88339	2.24326	1.22135	0.26461	0.405146	0.333333	1.26844	4.4	0.818883	9.23	9.03925	2.76343	3.40711	0	0	0	9
ANGEL IGLESIAS S.A.	Ireland	8	0	19	7	12	1	0	0	0	0	3.18256	0.764228	0.019023	0.26461	0.0741923	0.666667	-1.55102	4.3	-11.284	5.5	6.619	2.76343	3.40711	0	0	0	9
ANGEL IGLESIAS S.A.	Iceland	8	0	2	2	0	1	0	0	0	0	3.47432	0.957051	0.692716	0.26461	0.110148	0.666667	-1.04949	2.6	14.7276	5.53	5.47239	2.76343	3.40711	0	0	0	9
ANGEL IGLESIAS S.A.	Israel	8	0	9	4	5	1	0	0	0	0	3.54353	1.46344	0.103381	-0.21367	0.110461	0	1.01767	9	4.52632	5.17	6.84033	2.76343	3.40711	0	0	0	9
ANGEL IGLESIAS S.A.	Italy	8	0	65	33	32	1	0	0	0	0	3.12249	0.419623	0.297329	-0.25827	0.00573603	0.25	-1.29153	7.7	1.13309	-3.56	7.76795	2.76343	3.40711	0	0	0	9
ANGEL IGLESIAS S.A.	Japan	8	0	15	10	5	1	0	0	0	0	4.02876	0.661939	0.887715	0.52605	0.0207448	0.416667	1.26844	4.4	0.0612047	2.6	8.10644	2.76343	3.40711	0	0	0	9
ANGEL IGLESIAS S.A.	Latvia	8	0	3	2	1	1	0	0	0	0	3.43418	0.923385	0.149979	0.26461	0.312954	0.416667	-1.03204	8.9	3.9397	10.6	6.36182	2.76343	3.40711	0	0	0	9
ANGEL IGLESIAS S.A.	Lithuania	8	0	2	2	0	1	0	0	0	0	3.41598	0.941538	0.270507	0.26461	0.206518	0.25	-1.29153	8.3	3.93337	7.56	6.5333	2.76343	3.40711	0	0	0	9
ANGEL IGLESIAS S.A.	Luxembourg	8	0	8	6	2	1	0	0	0	0	3.11354	1.69208	0.929135	-0.25827	0.11085	0.166667	-1.55102	4.5	10.1045	4.03	5.65964	2.76343	3.40711	0	0	0	9
ANGEL IGLESIAS S.A.	Malta	8	0	3	2	1	1	0	0	0	0	3.20679	1.13972	0.366184	0.52605	0.130339	0.333333	-1.55102	7.3	10.5646	2.49	5.60584	2.76343	3.40711	0	0	0	9
ANGEL IGLESIAS S.A.	Morocco	8	0	40	20	20	1	0	0	0	0	2.94765	2.40856	0.965929	0.52605	1.13327	0.166667	1.27716	11	5.6818	1.72	7.47918	2.76343	3.40711	0	0	0	9
ANGEL IGLESIAS S.A.	Mexico	8	1	68	26	42	1	0	0	0	0	3.96116	1.61593	0.61242	-3.86767	0.803904	0.333333	-1.55102	3.5	2.35186	2.8	8.01321	2.76343	3.40711	0	0	0	9
ANGEL IGLESIAS S.A.	Nigeria	8	0	2	1	1	1	0	0	0	0	3.5664	2.38172	1.08093	0.26461	1.74765	0.666667	-0.530518	5.6	3.50758	6.1	8.15031	2.76343	3.40711	0	0	0	9
ANGEL IGLESIAS S.A.	Norway	8	0	10	8	2	1	0	0	0	0	3.39007	0.558513	0.773884	0.26461	0.110833	0.166667	-1.04949	4.6	1.15494	2.26	6.66495	2.76343	3.40711	0	0	0	9
ANGEL IGLESIAS S.A.	New Zealand	8	0	2	2	0	1	0	0	0	0	4.2904	0.485975	0.553697	0.26461	0.0975475	0.666667	-0.790003	3.8	1.46672	1.9	6.61267	2.76343	3.40711	0	0	0	9
ANGEL IGLESIAS S.A.	Panama	8	0	24	7	17	1	0	0	0	0	3.91924	1.43673	0.720964	-3.38939	0.445543	0.666667	-1.29153	9.8	4.37245	6.91	6.5094	2.76343	3.40711	0	0	0	9
ANGEL IGLESIAS S.A.	Peru	8	0	33	8	25	1	0	0	0	0	3.97657	1.42631	0.798443	-3.38939	0.983327	0.666667	-1.55102	5.2	3.2493	6.45	7.44667	2.76343	3.40711	0	0	0	9
ANGEL IGLESIAS S.A.	Poland	8	0	53	27	26	1	0	0	0	0	3.33558	1.19959	0.38872	0.26461	0.0799061	0.25	-1.29153	17.7	2.54782	3.55	7.58167	2.76343	3.40711	0	0	0	9
ANGEL IGLESIAS S.A.	Portugal	8	1	102	38	64	1	0	0	0	0	2.8324	0.769779	0.315828	-0.25827	0.0980653	0.166667	-1.29153	7.6	1.69826	0.37	7.02323	2.76343	3.40711	0	0	0	9
ANGEL IGLESIAS S.A.	UK	8	0	68	27	41	1	0	0	0	0	3.15698	0.805554	0.679132	0.26461	0.00306242	0.5	-0.790003	4.7	7.47323	1.82	7.77979	2.76343	3.40711	0	0	0	9
ANGEL IGLESIAS S.A.	Czech Republic	8	0	28	18	10	1	0	0	0	0	3.26204	0.685613	0.00167352	0.26461	0.00949857	0.666667	-1.03204	7.9	8.86508	6.08	7.01005	2.76343	3.40711	0	0	0	9
ANGEL IGLESIAS S.A.	Romania	8	0	20	9	11	1	0	0	0	0	3.37913	1.01845	0.52496	-0.25827	0.348609	0.5	-0.790003	7.2	6.46266	4.1	7.33514	2.76343	3.40711	0	0	0	9
ANGEL IGLESIAS S.A.	Rusia	8	1	24	16	8	1	0	0	0	0	3.62123	0.696054	0.111071	0.26461	0.792843	0.666667	-0.790003	7.1	1.90974	6.4	8.15568	2.76343	3.40711	0	0	0	9
ANGEL IGLESIAS S.A.	Serbia	8	0	7	4	3	1	0	0	0	0	3.30011	1.33787	0.652569	0.26461	1.71416	0.333333	-0.790003	20.8	5.64939	4.68	6.90656	2.76343	3.40711	0	0	0	9
ANGEL IGLESIAS S.A.	Singapur	8	0	13	10	3	1	0	0	0	0	4.05448	1.4349	0.479333	0.26461	1.00484	0.666667	1.00895	4.1	17.2101	6.62	6.63767	2.76343	3.40711	0	0	0	9
ANGEL IGLESIAS S.A.	South Africa	8	0	14	6	8	1	0	0	0	0	3.91822	1.72008	0.6954	0.26461	0.167296	0	-0.790003	23.8	2.63118	5.1	7.67106	2.76343	3.40711	0	0	0	9
ANGEL IGLESIAS S.A.	Sweden	8	0	15	9	6	1	0	0	0	0	3.3956	0.90496	0.81257	0.26461	0.108496	0	-0.790003	7.7	3.74326	2.7	6.9554	2.76343	3.40711	0	0	0	9
ANGEL IGLESIAS S.A.	Switzerland	8	0	18	8	10	1	0	0	0	0	3.91415	0.836495	0.694867	-0.21367	0.150978	0.166667	-1.55102	4.4	1.57889	1.9	6.8714	2.76343	3.40711	0	0	0	9
ANGEL IGLESIAS S.A.	Thailand	8	0	14	10	4	1	0	0	0	0	4.00637	1.44759	1.08846	0.52605	0.353899	0.666667	1.26844	1.3	2.09225	4.49	7.80776	2.76343	3.40711	0	0	0	9
ANGEL IGLESIAS S.A.	Turquia	8	0	18	13	5	1	0	0	0	0	3.47222	1.60088	0.7561	0.52605	0.628774	0.666667	1.27716	10.6	2.66423	7.38	7.85772	2.76343	3.40711	0	0	0	9
ANGEL IGLESIAS S.A.	Uruguay	8	0	23	7	16	1	0	0	0	0	3.99607	1.1487	0.233146	-3.86767	0.14597	0.666667	-1.29153	12.2	3.61146	6.56	6.51927	2.76343	3.40711	0	0	0	9
ANGEL IGLESIAS S.A.	Venezuela	8	0	31	11	20	1	0	0	0	0	3.8557	1.76796	0.336214	-3.86767	0.309872	0.166667	-1.55102	11.4	2.04181	10.33	7.42451	2.76343	3.40711	0	0	0	9
ARTECHE LANTEGI ELKARTEA SOCIEDAD ANONIMA	Germany	9	0	56	29	27	1	0	0	0	0	3.21148	0.536164	0.562607	0.26461	0.0541978	0.666667	-1.29153	11.1	1.16865	0.96	7.91629	2.93052	26.526	0	1	0	7
ARTECHE LANTEGI ELKARTEA SOCIEDAD ANONIMA	Argentina	9	1	61	22	39	1	0	0	0	0	4.00345	1.28036	0.249754	-3.86767	0.279269	0.666667	-1.55102	10.6	2.54485	9.18	7.58824	2.93052	26.526	0	1	0	7
ARTECHE LANTEGI ELKARTEA SOCIEDAD ANONIMA	Australia	9	0	18	12	6	1	0	0	0	0	4.23231	0.567562	0.721527	0.26461	0.165512	0	-1.29153	5	-4.71452	2.8	7.30812	2.93052	26.526	0	1	0	7
ARTECHE LANTEGI ELKARTEA SOCIEDAD ANONIMA	Austria	9	0	13	10	3	1	0	0	0	0	3.23123	0.588788	0.518591	0.26461	0.0931028	0.333333	-1.55102	5.2	2.91401	1.8	6.91557	2.93052	26.526	0	1	0	7
ARTECHE LANTEGI ELKARTEA SOCIEDAD ANONIMA	Bangladesh	9	0	2	1	1	1	0	0	0	0	3.93561	2.63734	1.3076	0.26461	0.590559	0.333333	1.27716	4.3	1.15269	5.96	8.15174	2.93052	26.526	0	1	0	7
ARTECHE LANTEGI ELKARTEA SOCIEDAD ANONIMA	Belgium	9	0	38	15	23	1	0	0	0	0	3.13244	0.777357	0.634216	-0.25827	0.130961	0.666667	-1.29153	8.4	6.38874	1.25	7.02031	2.93052	26.526	0	1	0	7
ARTECHE LANTEGI ELKARTEA SOCIEDAD ANONIMA	Brasil	9	1	53	24	29	1	0	0	0	0	3.89327	1.91931	0.602092	-0.25827	0.406583	0.25	-1.55102	9.3	1.70724	2.94	8.27046	2.93052	26.526	0	1	0	7
ARTECHE LANTEGI ELKARTEA SOCIEDAD ANONIMA	Bulgaria	9	0	13	5	8	1	0	0	0	0	3.36942	1.12444	0.190378	0.26461	0.191694	0.5	-0.790003	10.1	8.1765	6.25	6.88874	2.93052	26.526	0	1	0	7
ARTECHE LANTEGI ELKARTEA SOCIEDAD ANONIMA	Canada	9	0	23	11	12	1	0	0	0	0	3.81425	0.103029	0.79255	-0.25827	0.161496	0.166667	-1.29153	6.7	3.0366	2.9	7.50919	2.93052	26.526	0	1	0	7
ARTECHE LANTEGI ELKARTEA SOCIEDAD ANONIMA	Chile	9	0	49	17	32	1	0	0	0	0	4.03132	1.48778	0.490568	-3.86767	0.146208	0.416667	-1.55102	8	5.60687	5.71	7.21206	2.93052	26.526	0	1	0	7
ARTECHE LANTEGI ELKARTEA SOCIEDAD ANONIMA	China	9	1	44	28	16	1	0	0	0	0	3.98191	1.90078	1.11489	0.52605	1.8939	0.333333	1.26844	4.2	3.22686	10.2	9.11544	2.93052	26.526	0	1	0	7
ARTECHE LANTEGI ELKARTEA SOCIEDAD ANONIMA	Colombia	9	0	33	7	26	1	0	0	0	0	3.90663	1.54759	0.748636	-3.86767	0.629637	0.166667	-1.55102	12	8.29023	4.72	7.65269	2.93052	26.526	0	1	0	7
ARTECHE LANTEGI ELKARTEA SOCIEDAD ANONIMA	South Korea	9	0	10	9	1	1	0	0	0	0	4.00439	0.420141	0.172921	0.52605	0.19628	0.541667	-0.271032	3.7	0.900652	4.2	7.68389	2.93052	26.526	0	1	0	7
ARTECHE LANTEGI ELKARTEA SOCIEDAD ANONIMA	Costa Rica	9	0	15	4	11	1	0	0	0	0	3.93278	1.54875	0.662422	-3.86767	0.00206424	0	-1.55102	6.6	3.26941	5.91	6.63621	2.93052	26.526	0	1	0	7
ARTECHE LANTEGI ELKARTEA SOCIEDAD ANONIMA	Croacia	9	0	8	5	3	1	0	0	0	0	3.22565	1.27885	0.253946	0.26461	1.01215	0.666667	-1.55102	12.6	4.3578	4.28	6.64771	2.93052	26.526	0	1	0	7
ARTECHE LANTEGI ELKARTEA SOCIEDAD ANONIMA	Denmark	9	0	10	6	4	1	0	0	0	0	3.31418	0.590138	0.733766	0.26461	0.112828	0.166667	-1.04949	4.8	2.05207	3.05	6.73368	2.93052	26.526	0	1	0	7
ARTECHE LANTEGI ELKARTEA SOCIEDAD ANONIMA	Ecuador	9	0	18	4	14	1	0	0	0	0	3.95347	1.61213	0.825643	-3.38939	0.280888	0.133333	-1.55102	7.7	5.24269	4.74	7.12151	2.93052	26.526	0	1	0	7
ARTECHE LANTEGI ELKARTEA SOCIEDAD ANONIMA	El Salvador	9	0	12	4	8	1	0	0	0	0	3.94102	2.12139	0.718083	-3.86767	0.459103	0.666667	-1.55102	7.2	3.05173	2.75	6.83765	2.93052	26.526	0	1	0	7
ARTECHE LANTEGI ELKARTEA SOCIEDAD ANONIMA	Slovakia	9	0	13	9	4	1	0	0	0	0	3.29809	0.931708	0.0511288	0.26461	0.296655	0.333333	-1.29153	16.2	4.02343	6.04	6.73135	2.93052	26.526	0	1	0	7
ARTECHE LANTEGI ELKARTEA SOCIEDAD ANONIMA	Slovenia	9	0	6	5	1	1	0	0	0	0	3.20355	0.40353	0.182051	0.26461	0.101477	0.333333	-1.29153	6.5	1.4438	4.03	6.30114	2.93052	26.526	0	1	0	7
ARTECHE LANTEGI ELKARTEA SOCIEDAD ANONIMA	USA	9	1	74	32	42	1	0	0	0	0	3.87141	0.553655	1.26073	-0.69195	0.15745	0.166667	-1.29153	5.1	0.800894	3.2	8.47189	2.93052	26.526	0	1	0	7
ARTECHE LANTEGI ELKARTEA SOCIEDAD ANONIMA	Estonia	9	0	3	2	1	1	0	0	0	0	3.46571	0.927963	0.110104	0.26461	0.20986	0.666667	-0.530518	7.9	20.7518	10.47	6.12908	2.93052	26.526	0	1	0	7
ARTECHE LANTEGI ELKARTEA SOCIEDAD ANONIMA	Ethiopia	9	0	2	0	2	1	0	0	0	0	3.72911	2.78128	1.3431	0.26461	1.26883	0.333333	-0.530518	5.4	1.80247	10.2	7.85282	2.93052	26.526	0	1	0	7
ARTECHE LANTEGI ELKARTEA SOCIEDAD ANONIMA	Philippine	9	0	12	8	4	1	0	0	0	0	4.07154	1.53391	0.995918	0.26461	0.359399	0.208333	-1.55102	7.7	1.1508	4.97	7.91936	2.93052	26.526	0	1	0	7
ARTECHE LANTEGI ELKARTEA SOCIEDAD ANONIMA	Finland	9	0	9	5	4	1	0	0	0	0	3.48105	0.507403	0.679478	0.52605	0.114138	0.0833333	-1.04949	8.4	2.36125	2.09	6.71984	2.93052	26.526	0	1	0	7
ARTECHE LANTEGI ELKARTEA SOCIEDAD ANONIMA	France	9	0	80	38	42	1	0	0	0	0	2.98175	0.490732	0.583416	-0.25827	0.0417816	0.333333	-1.29153	8.9	2.98952	1.19	7.78442	2.93052	26.526	0	1	0	7
ARTECHE LANTEGI ELKARTEA SOCIEDAD ANONIMA	Greece	9	0	20	11	9	1	0	0	0	0	3.35976	0.538884	0.215795	0.26461	0.101199	0.166667	-1.04949	9.8	0.269531	3.66	7.04548	2.93052	26.526	0	1	0	7
ARTECHE LANTEGI ELKARTEA SOCIEDAD ANONIMA	The Netherlands	9	0	23	15	8	1	0	0	0	0	3.17633	0.566689	0.663452	0.26461	0.0980731	0	-1.29153	4.7	6.98972	1.13	7.21272	2.93052	26.526	0	1	0	7
ARTECHE LANTEGI ELKARTEA SOCIEDAD ANONIMA	Hungary	9	0	20	12	8	1	0	0	0	0	3.29217	1.2511	0.147629	0.52605	0.00651064	0	-1.29153	7.2	6.0699	4.25	7.00376	2.93052	26.526	0	1	0	7
ARTECHE LANTEGI ELKARTEA SOCIEDAD ANONIMA	India	9	0	18	11	7	1	0	0	0	0	3.88339	2.24326	1.22135	0.26461	0.405146	0.333333	1.26844	4.4	0.818883	9.23	9.03925	2.93052	26.526	0	1	0	7
ARTECHE LANTEGI ELKARTEA SOCIEDAD ANONIMA	Ireland	9	0	19	7	12	1	0	0	0	0	3.18256	0.764228	0.019023	0.26461	0.0741923	0.666667	-1.55102	4.3	-11.284	5.5	6.619	2.93052	26.526	0	1	0	7
ARTECHE LANTEGI ELKARTEA SOCIEDAD ANONIMA	Iceland	9	0	2	2	0	1	0	0	0	0	3.47432	0.957051	0.692716	0.26461	0.110148	0.666667	-1.04949	2.6	14.7276	5.53	5.47239	2.93052	26.526	0	1	0	7
ARTECHE LANTEGI ELKARTEA SOCIEDAD ANONIMA	Israel	9	0	9	4	5	1	0	0	0	0	3.54353	1.46344	0.103381	-0.21367	0.110461	0	1.01767	9	4.52632	5.17	6.84033	2.93052	26.526	0	1	0	7
ARTECHE LANTEGI ELKARTEA SOCIEDAD ANONIMA	Italy	9	0	65	33	32	1	0	0	0	0	3.12249	0.419623	0.297329	-0.25827	0.00573603	0.25	-1.29153	7.7	1.13309	-3.56	7.76795	2.93052	26.526	0	1	0	7
ARTECHE LANTEGI ELKARTEA SOCIEDAD ANONIMA	Japan	9	0	15	10	5	1	0	0	0	0	4.02876	0.661939	0.887715	0.52605	0.0207448	0.416667	1.26844	4.4	0.0612047	2.6	8.10644	2.93052	26.526	0	1	0	7
ARTECHE LANTEGI ELKARTEA SOCIEDAD ANONIMA	Latvia	9	0	3	2	1	1	0	0	0	0	3.43418	0.923385	0.149979	0.26461	0.312954	0.416667	-1.03204	8.9	3.9397	10.6	6.36182	2.93052	26.526	0	1	0	7
ARTECHE LANTEGI ELKARTEA SOCIEDAD ANONIMA	Lithuania	9	0	2	2	0	1	0	0	0	0	3.41598	0.941538	0.270507	0.26461	0.206518	0.25	-1.29153	8.3	3.93337	7.56	6.5333	2.93052	26.526	0	1	0	7
ARTECHE LANTEGI ELKARTEA SOCIEDAD ANONIMA	Luxembourg	9	0	8	6	2	1	0	0	0	0	3.11354	1.69208	0.929135	-0.25827	0.11085	0.166667	-1.55102	4.5	10.1045	4.03	5.65964	2.93052	26.526	0	1	0	7
ARTECHE LANTEGI ELKARTEA SOCIEDAD ANONIMA	Malta	9	0	3	2	1	1	0	0	0	0	3.20679	1.13972	0.366184	0.52605	0.130339	0.333333	-1.55102	7.3	10.5646	2.49	5.60584	2.93052	26.526	0	1	0	7
ARTECHE LANTEGI ELKARTEA SOCIEDAD ANONIMA	Morocco	9	0	40	20	20	1	0	0	0	0	2.94765	2.40856	0.965929	0.52605	1.13327	0.166667	1.27716	11	5.6818	1.72	7.47918	2.93052	26.526	0	1	0	7
ARTECHE LANTEGI ELKARTEA SOCIEDAD ANONIMA	Mexico	9	1	68	26	42	1	0	0	0	0	3.96116	1.61593	0.61242	-3.86767	0.803904	0.333333	-1.55102	3.5	2.35186	2.8	8.01321	2.93052	26.526	0	1	0	7
ARTECHE LANTEGI ELKARTEA SOCIEDAD ANONIMA	Nigeria	9	0	2	1	1	1	0	0	0	0	3.5664	2.38172	1.08093	0.26461	1.74765	0.666667	-0.530518	5.6	3.50758	6.1	8.15031	2.93052	26.526	0	1	0	7
ARTECHE LANTEGI ELKARTEA SOCIEDAD ANONIMA	Norway	9	0	10	8	2	1	0	0	0	0	3.39007	0.558513	0.773884	0.26461	0.110833	0.166667	-1.04949	4.6	1.15494	2.26	6.66495	2.93052	26.526	0	1	0	7
ARTECHE LANTEGI ELKARTEA SOCIEDAD ANONIMA	New Zealand	9	0	2	2	0	1	0	0	0	0	4.2904	0.485975	0.553697	0.26461	0.0975475	0.666667	-0.790003	3.8	1.46672	1.9	6.61267	2.93052	26.526	0	1	0	7
ARTECHE LANTEGI ELKARTEA SOCIEDAD ANONIMA	Panama	9	0	24	7	17	1	0	0	0	0	3.91924	1.43673	0.720964	-3.38939	0.445543	0.666667	-1.29153	9.8	4.37245	6.91	6.5094	2.93052	26.526	0	1	0	7
ARTECHE LANTEGI ELKARTEA SOCIEDAD ANONIMA	Peru	9	0	33	8	25	1	0	0	0	0	3.97657	1.42631	0.798443	-3.38939	0.983327	0.666667	-1.55102	5.2	3.2493	6.45	7.44667	2.93052	26.526	0	1	0	7
ARTECHE LANTEGI ELKARTEA SOCIEDAD ANONIMA	Poland	9	0	53	27	26	1	0	0	0	0	3.33558	1.19959	0.38872	0.26461	0.0799061	0.25	-1.29153	17.7	2.54782	3.55	7.58167	2.93052	26.526	0	1	0	7
ARTECHE LANTEGI ELKARTEA SOCIEDAD ANONIMA	Portugal	9	0	102	38	64	1	0	0	0	0	2.8324	0.769779	0.315828	-0.25827	0.0980653	0.166667	-1.29153	7.6	1.69826	0.37	7.02323	2.93052	26.526	0	1	0	7
ARTECHE LANTEGI ELKARTEA SOCIEDAD ANONIMA	UK	9	0	68	27	41	1	0	0	0	0	3.15698	0.805554	0.679132	0.26461	0.00306242	0.5	-0.790003	4.7	7.47323	1.82	7.77979	2.93052	26.526	0	1	0	7
ARTECHE LANTEGI ELKARTEA SOCIEDAD ANONIMA	Czech Republic	9	0	28	18	10	1	0	0	0	0	3.26204	0.685613	0.00167352	0.26461	0.00949857	0.666667	-1.03204	7.9	8.86508	6.08	7.01005	2.93052	26.526	0	1	0	7
ARTECHE LANTEGI ELKARTEA SOCIEDAD ANONIMA	Romania	9	0	20	9	11	1	0	0	0	0	3.37913	1.01845	0.52496	-0.25827	0.348609	0.5	-0.790003	7.2	6.46266	4.1	7.33514	2.93052	26.526	0	1	0	7
ARTECHE LANTEGI ELKARTEA SOCIEDAD ANONIMA	Rusia	9	0	24	16	8	1	0	0	0	0	3.62123	0.696054	0.111071	0.26461	0.792843	0.666667	-0.790003	7.1	1.90974	6.4	8.15568	2.93052	26.526	0	1	0	7
ARTECHE LANTEGI ELKARTEA SOCIEDAD ANONIMA	Serbia	9	0	7	4	3	1	0	0	0	0	3.30011	1.33787	0.652569	0.26461	1.71416	0.333333	-0.790003	20.8	5.64939	4.68	6.90656	2.93052	26.526	0	1	0	7
ARTECHE LANTEGI ELKARTEA SOCIEDAD ANONIMA	Singapur	9	0	13	10	3	1	0	0	0	0	4.05448	1.4349	0.479333	0.26461	1.00484	0.666667	1.00895	4.1	17.2101	6.62	6.63767	2.93052	26.526	0	1	0	7
ARTECHE LANTEGI ELKARTEA SOCIEDAD ANONIMA	South Africa	9	0	14	6	8	1	0	0	0	0	3.91822	1.72008	0.6954	0.26461	0.167296	0	-0.790003	23.8	2.63118	5.1	7.67106	2.93052	26.526	0	1	0	7
ARTECHE LANTEGI ELKARTEA SOCIEDAD ANONIMA	Sweden	9	0	15	9	6	1	0	0	0	0	3.3956	0.90496	0.81257	0.26461	0.108496	0	-0.790003	7.7	3.74326	2.7	6.9554	2.93052	26.526	0	1	0	7
ARTECHE LANTEGI ELKARTEA SOCIEDAD ANONIMA	Switzerland	9	0	18	8	10	1	0	0	0	0	3.91415	0.836495	0.694867	-0.21367	0.150978	0.166667	-1.55102	4.4	1.57889	1.9	6.8714	2.93052	26.526	0	1	0	7
ARTECHE LANTEGI ELKARTEA SOCIEDAD ANONIMA	Thailand	9	1	14	10	4	1	0	0	0	0	4.00637	1.44759	1.08846	0.52605	0.353899	0.666667	1.26844	1.3	2.09225	4.49	7.80776	2.93052	26.526	0	1	0	7
ARTECHE LANTEGI ELKARTEA SOCIEDAD ANONIMA	Turquia	9	0	18	13	5	1	0	0	0	0	3.47222	1.60088	0.7561	0.52605	0.628774	0.666667	1.27716	10.6	2.66423	7.38	7.85772	2.93052	26.526	0	1	0	7
ARTECHE LANTEGI ELKARTEA SOCIEDAD ANONIMA	Uruguay	9	0	23	7	16	1	0	0	0	0	3.99607	1.1487	0.233146	-3.86767	0.14597	0.666667	-1.29153	12.2	3.61146	6.56	6.51927	2.93052	26.526	0	1	0	7
ARTECHE LANTEGI ELKARTEA SOCIEDAD ANONIMA	Venezuela	9	1	31	11	20	1	0	0	0	0	3.8557	1.76796	0.336214	-3.86767	0.309872	0.166667	-1.55102	11.4	2.04181	10.33	7.42451	2.93052	26.526	0	1	0	7
ASPRO OCIO SA	Germany	10	0	56	9	47	0	0	0	0	0	3.21148	0.536164	0.562607	0.26461	0.0541978	0.666667	-1.29153	11.1	1.16865	0.96	7.91629	3.00014	33.1884	0	0	0	6
ASPRO OCIO SA	Argentina	10	0	61	18	43	0	0	0	0	0	4.00345	1.28036	0.249754	-3.86767	0.279269	0.666667	-1.55102	10.6	2.54485	9.18	7.58824	3.00014	33.1884	0	0	0	6
ASPRO OCIO SA	Australia	10	0	18	0	18	0	0	0	0	0	4.23231	0.567562	0.721527	0.26461	0.165512	0	-1.29153	5	-4.71452	2.8	7.30812	3.00014	33.1884	0	0	0	6
ASPRO OCIO SA	Austria	10	0	13	3	10	0	0	0	0	0	3.23123	0.588788	0.518591	0.26461	0.0931028	0.333333	-1.55102	5.2	2.91401	1.8	6.91557	3.00014	33.1884	0	0	0	6
ASPRO OCIO SA	Bangladesh	10	0	2	1	1	0	0	0	0	0	3.93561	2.63734	1.3076	0.26461	0.590559	0.333333	1.27716	4.3	1.15269	5.96	8.15174	3.00014	33.1884	0	0	0	6
ASPRO OCIO SA	Belgium	10	1	38	12	26	0	0	0	0	0	3.13244	0.777357	0.634216	-0.25827	0.130961	0.666667	-1.29153	8.4	6.38874	1.25	7.02031	3.00014	33.1884	0	0	0	6
ASPRO OCIO SA	Brasil	10	0	53	11	42	0	0	0	0	0	3.89327	1.91931	0.602092	-0.25827	0.406583	0.25	-1.55102	9.3	1.70724	2.94	8.27046	3.00014	33.1884	0	0	0	6
ASPRO OCIO SA	Bulgaria	10	0	13	2	11	0	0	0	0	0	3.36942	1.12444	0.190378	0.26461	0.191694	0.5	-0.790003	10.1	8.1765	6.25	6.88874	3.00014	33.1884	0	0	0	6
ASPRO OCIO SA	Canada	10	0	23	2	21	0	0	0	0	0	3.81425	0.103029	0.79255	-0.25827	0.161496	0.166667	-1.29153	6.7	3.0366	2.9	7.50919	3.00014	33.1884	0	0	0	6
ASPRO OCIO SA	Chile	10	0	49	12	37	0	0	0	0	0	4.03132	1.48778	0.490568	-3.86767	0.146208	0.416667	-1.55102	8	5.60687	5.71	7.21206	3.00014	33.1884	0	0	0	6
ASPRO OCIO SA	China	10	0	44	6	38	0	0	0	0	0	3.98191	1.90078	1.11489	0.52605	1.8939	0.333333	1.26844	4.2	3.22686	10.2	9.11544	3.00014	33.1884	0	0	0	6
ASPRO OCIO SA	Colombia	10	0	33	12	21	0	0	0	0	0	3.90663	1.54759	0.748636	-3.86767	0.629637	0.166667	-1.55102	12	8.29023	4.72	7.65269	3.00014	33.1884	0	0	0	6
ASPRO OCIO SA	South Korea	10	0	10	0	10	0	0	0	0	0	4.00439	0.420141	0.172921	0.52605	0.19628	0.541667	-0.271032	3.7	0.900652	4.2	7.68389	3.00014	33.1884	0	0	0	6
ASPRO OCIO SA	Costa Rica	10	0	15	6	9	0	0	0	0	0	3.93278	1.54875	0.662422	-3.86767	0.00206424	0	-1.55102	6.6	3.26941	5.91	6.63621	3.00014	33.1884	0	0	0	6
ASPRO OCIO SA	Croacia	10	0	8	1	7	0	0	0	0	0	3.22565	1.27885	0.253946	0.26461	1.01215	0.666667	-1.55102	12.6	4.3578	4.28	6.64771	3.00014	33.1884	0	0	0	6
ASPRO OCIO SA	Denmark	10	0	10	1	9	0	0	0	0	0	3.31418	0.590138	0.733766	0.26461	0.112828	0.166667	-1.04949	4.8	2.05207	3.05	6.73368	3.00014	33.1884	0	0	0	6
ASPRO OCIO SA	Ecuador	10	0	18	5	13	0	0	0	0	0	3.95347	1.61213	0.825643	-3.38939	0.280888	0.133333	-1.55102	7.7	5.24269	4.74	7.12151	3.00014	33.1884	0	0	0	6
ASPRO OCIO SA	El Salvador	10	0	12	2	10	0	0	0	0	0	3.94102	2.12139	0.718083	-3.86767	0.459103	0.666667	-1.55102	7.2	3.05173	2.75	6.83765	3.00014	33.1884	0	0	0	6
ASPRO OCIO SA	Slovakia	10	0	13	1	12	0	0	0	0	0	3.29809	0.931708	0.0511288	0.26461	0.296655	0.333333	-1.29153	16.2	4.02343	6.04	6.73135	3.00014	33.1884	0	0	0	6
ASPRO OCIO SA	Slovenia	10	0	6	0	6	0	0	0	0	0	3.20355	0.40353	0.182051	0.26461	0.101477	0.333333	-1.29153	6.5	1.4438	4.03	6.30114	3.00014	33.1884	0	0	0	6
ASPRO OCIO SA	USA	10	0	74	13	61	0	0	0	0	0	3.87141	0.553655	1.26073	-0.69195	0.15745	0.166667	-1.29153	5.1	0.800894	3.2	8.47189	3.00014	33.1884	0	0	0	6
ASPRO OCIO SA	Estonia	10	0	3	0	3	0	0	0	0	0	3.46571	0.927963	0.110104	0.26461	0.20986	0.666667	-0.530518	7.9	20.7518	10.47	6.12908	3.00014	33.1884	0	0	0	6
ASPRO OCIO SA	Ethiopia	10	0	2	0	2	0	0	0	0	0	3.72911	2.78128	1.3431	0.26461	1.26883	0.333333	-0.530518	5.4	1.80247	10.2	7.85282	3.00014	33.1884	0	0	0	6
ASPRO OCIO SA	Philippine	10	0	12	2	10	0	0	0	0	0	4.07154	1.53391	0.995918	0.26461	0.359399	0.208333	-1.55102	7.7	1.1508	4.97	7.91936	3.00014	33.1884	0	0	0	6
ASPRO OCIO SA	Finland	10	1	9	2	7	0	0	0	0	0	3.48105	0.507403	0.679478	0.52605	0.114138	0.0833333	-1.04949	8.4	2.36125	2.09	6.71984	3.00014	33.1884	0	0	0	6
ASPRO OCIO SA	France	10	1	80	16	64	0	0	0	0	0	2.98175	0.490732	0.583416	-0.25827	0.0417816	0.333333	-1.29153	8.9	2.98952	1.19	7.78442	3.00014	33.1884	0	0	0	6
ASPRO OCIO SA	Greece	10	0	20	0	20	0	0	0	0	0	3.35976	0.538884	0.215795	0.26461	0.101199	0.166667	-1.04949	9.8	0.269531	3.66	7.04548	3.00014	33.1884	0	0	0	6
ASPRO OCIO SA	The Netherlands	10	0	23	4	19	0	0	0	0	0	3.17633	0.566689	0.663452	0.26461	0.0980731	0	-1.29153	4.7	6.98972	1.13	7.21272	3.00014	33.1884	0	0	0	6
ASPRO OCIO SA	Hungary	10	0	20	3	17	0	0	0	0	0	3.29217	1.2511	0.147629	0.52605	0.00651064	0	-1.29153	7.2	6.0699	4.25	7.00376	3.00014	33.1884	0	0	0	6
ASPRO OCIO SA	India	10	0	18	1	17	0	0	0	0	0	3.88339	2.24326	1.22135	0.26461	0.405146	0.333333	1.26844	4.4	0.818883	9.23	9.03925	3.00014	33.1884	0	0	0	6
ASPRO OCIO SA	Ireland	10	0	19	1	18	0	0	0	0	0	3.18256	0.764228	0.019023	0.26461	0.0741923	0.666667	-1.55102	4.3	-11.284	5.5	6.619	3.00014	33.1884	0	0	0	6
ASPRO OCIO SA	Iceland	10	0	2	0	2	0	0	0	0	0	3.47432	0.957051	0.692716	0.26461	0.110148	0.666667	-1.04949	2.6	14.7276	5.53	5.47239	3.00014	33.1884	0	0	0	6
ASPRO OCIO SA	Israel	10	0	9	2	7	0	0	0	0	0	3.54353	1.46344	0.103381	-0.21367	0.110461	0	1.01767	9	4.52632	5.17	6.84033	3.00014	33.1884	0	0	0	6
ASPRO OCIO SA	Italy	10	0	65	13	52	0	0	0	0	0	3.12249	0.419623	0.297329	-0.25827	0.00573603	0.25	-1.29153	7.7	1.13309	-3.56	7.76795	3.00014	33.1884	0	0	0	6
ASPRO OCIO SA	Japan	10	0	15	1	14	0	0	0	0	0	4.02876	0.661939	0.887715	0.52605	0.0207448	0.416667	1.26844	4.4	0.0612047	2.6	8.10644	3.00014	33.1884	0	0	0	6
ASPRO OCIO SA	Latvia	10	0	3	0	3	0	0	0	0	0	3.43418	0.923385	0.149979	0.26461	0.312954	0.416667	-1.03204	8.9	3.9397	10.6	6.36182	3.00014	33.1884	0	0	0	6
ASPRO OCIO SA	Lithuania	10	0	2	0	2	0	0	0	0	0	3.41598	0.941538	0.270507	0.26461	0.206518	0.25	-1.29153	8.3	3.93337	7.56	6.5333	3.00014	33.1884	0	0	0	6
ASPRO OCIO SA	Luxembourg	10	0	8	1	7	0	0	0	0	0	3.11354	1.69208	0.929135	-0.25827	0.11085	0.166667	-1.55102	4.5	10.1045	4.03	5.65964	3.00014	33.1884	0	0	0	6
ASPRO OCIO SA	Malta	10	0	3	1	2	0	0	0	0	0	3.20679	1.13972	0.366184	0.52605	0.130339	0.333333	-1.55102	7.3	10.5646	2.49	5.60584	3.00014	33.1884	0	0	0	6
ASPRO OCIO SA	Morocco	10	0	40	6	34	0	0	0	0	0	2.94765	2.40856	0.965929	0.52605	1.13327	0.166667	1.27716	11	5.6818	1.72	7.47918	3.00014	33.1884	0	0	0	6
ASPRO OCIO SA	Mexico	10	0	68	17	51	0	0	0	0	0	3.96116	1.61593	0.61242	-3.86767	0.803904	0.333333	-1.55102	3.5	2.35186	2.8	8.01321	3.00014	33.1884	0	0	0	6
ASPRO OCIO SA	Nigeria	10	0	2	0	2	0	0	0	0	0	3.5664	2.38172	1.08093	0.26461	1.74765	0.666667	-0.530518	5.6	3.50758	6.1	8.15031	3.00014	33.1884	0	0	0	6
ASPRO OCIO SA	Norway	10	0	10	1	9	0	0	0	0	0	3.39007	0.558513	0.773884	0.26461	0.110833	0.166667	-1.04949	4.6	1.15494	2.26	6.66495	3.00014	33.1884	0	0	0	6
ASPRO OCIO SA	New Zealand	10	0	2	0	2	0	0	0	0	0	4.2904	0.485975	0.553697	0.26461	0.0975475	0.666667	-0.790003	3.8	1.46672	1.9	6.61267	3.00014	33.1884	0	0	0	6
ASPRO OCIO SA	Panama	10	0	24	6	18	0	0	0	0	0	3.91924	1.43673	0.720964	-3.38939	0.445543	0.666667	-1.29153	9.8	4.37245	6.91	6.5094	3.00014	33.1884	0	0	0	6
ASPRO OCIO SA	Peru	10	0	33	11	22	0	0	0	0	0	3.97657	1.42631	0.798443	-3.38939	0.983327	0.666667	-1.55102	5.2	3.2493	6.45	7.44667	3.00014	33.1884	0	0	0	6
ASPRO OCIO SA	Poland	10	0	53	5	48	0	0	0	0	0	3.33558	1.19959	0.38872	0.26461	0.0799061	0.25	-1.29153	17.7	2.54782	3.55	7.58167	3.00014	33.1884	0	0	0	6
ASPRO OCIO SA	Portugal	10	1	102	24	78	0	0	0	0	0	2.8324	0.769779	0.315828	-0.25827	0.0980653	0.166667	-1.29153	7.6	1.69826	0.37	7.02323	3.00014	33.1884	0	0	0	6
ASPRO OCIO SA	UK	10	1	68	16	52	0	0	0	0	0	3.15698	0.805554	0.679132	0.26461	0.00306242	0.5	-0.790003	4.7	7.47323	1.82	7.77979	3.00014	33.1884	0	0	0	6
ASPRO OCIO SA	Czech Republic	10	0	28	3	25	0	0	0	0	0	3.26204	0.685613	0.00167352	0.26461	0.00949857	0.666667	-1.03204	7.9	8.86508	6.08	7.01005	3.00014	33.1884	0	0	0	6
ASPRO OCIO SA	Romania	10	0	20	4	16	0	0	0	0	0	3.37913	1.01845	0.52496	-0.25827	0.348609	0.5	-0.790003	7.2	6.46266	4.1	7.33514	3.00014	33.1884	0	0	0	6
ASPRO OCIO SA	Rusia	10	0	24	2	22	0	0	0	0	0	3.62123	0.696054	0.111071	0.26461	0.792843	0.666667	-0.790003	7.1	1.90974	6.4	8.15568	3.00014	33.1884	0	0	0	6
ASPRO OCIO SA	Serbia	10	0	7	0	7	0	0	0	0	0	3.30011	1.33787	0.652569	0.26461	1.71416	0.333333	-0.790003	20.8	5.64939	4.68	6.90656	3.00014	33.1884	0	0	0	6
ASPRO OCIO SA	Singapur	10	0	13	2	11	0	0	0	0	0	4.05448	1.4349	0.479333	0.26461	1.00484	0.666667	1.00895	4.1	17.2101	6.62	6.63767	3.00014	33.1884	0	0	0	6
ASPRO OCIO SA	South Africa	10	0	14	3	11	0	0	0	0	0	3.91822	1.72008	0.6954	0.26461	0.167296	0	-0.790003	23.8	2.63118	5.1	7.67106	3.00014	33.1884	0	0	0	6
ASPRO OCIO SA	Sweden	10	0	15	2	13	0	0	0	0	0	3.3956	0.90496	0.81257	0.26461	0.108496	0	-0.790003	7.7	3.74326	2.7	6.9554	3.00014	33.1884	0	0	0	6
ASPRO OCIO SA	Switzerland	10	1	18	5	13	0	0	0	0	0	3.91415	0.836495	0.694867	-0.21367	0.150978	0.166667	-1.55102	4.4	1.57889	1.9	6.8714	3.00014	33.1884	0	0	0	6
ASPRO OCIO SA	Thailand	10	0	14	2	12	0	0	0	0	0	4.00637	1.44759	1.08846	0.52605	0.353899	0.666667	1.26844	1.3	2.09225	4.49	7.80776	3.00014	33.1884	0	0	0	6
ASPRO OCIO SA	Turquia	10	0	18	1	17	0	0	0	0	0	3.47222	1.60088	0.7561	0.52605	0.628774	0.666667	1.27716	10.6	2.66423	7.38	7.85772	3.00014	33.1884	0	0	0	6
ASPRO OCIO SA	Uruguay	10	0	23	9	14	0	0	0	0	0	3.99607	1.1487	0.233146	-3.86767	0.14597	0.666667	-1.29153	12.2	3.61146	6.56	6.51927	3.00014	33.1884	0	0	0	6
ASPRO OCIO SA	Venezuela	10	0	31	9	22	0	0	0	0	0	3.8557	1.76796	0.336214	-3.86767	0.309872	0.166667	-1.55102	11.4	2.04181	10.33	7.42451	3.00014	33.1884	0	0	0	6
AVANZA AGRUPACION PARA EL TRANSPORTE SA (EXTINGUIDA)	Germany	11	0	56	9	47	0	0	0	0	0	3.21148	0.536164	0.562607	0.26461	0.0541978	0.666667	-1.29153	11.1	1.16865	0.96	7.91629	3.44324	4.22689	0	1	0	1
AVANZA AGRUPACION PARA EL TRANSPORTE SA (EXTINGUIDA)	Argentina	11	0	61	18	43	0	0	0	0	0	4.00345	1.28036	0.249754	-3.86767	0.279269	0.666667	-1.55102	10.6	2.54485	9.18	7.58824	3.44324	4.22689	0	1	0	1
AVANZA AGRUPACION PARA EL TRANSPORTE SA (EXTINGUIDA)	Australia	11	0	18	0	18	0	0	0	0	0	4.23231	0.567562	0.721527	0.26461	0.165512	0	-1.29153	5	-4.71452	2.8	7.30812	3.44324	4.22689	0	1	0	1
AVANZA AGRUPACION PARA EL TRANSPORTE SA (EXTINGUIDA)	Austria	11	0	13	3	10	0	0	0	0	0	3.23123	0.588788	0.518591	0.26461	0.0931028	0.333333	-1.55102	5.2	2.91401	1.8	6.91557	3.44324	4.22689	0	1	0	1
AVANZA AGRUPACION PARA EL TRANSPORTE SA (EXTINGUIDA)	Bangladesh	11	0	2	1	1	0	0	0	0	0	3.93561	2.63734	1.3076	0.26461	0.590559	0.333333	1.27716	4.3	1.15269	5.96	8.15174	3.44324	4.22689	0	1	0	1
AVANZA AGRUPACION PARA EL TRANSPORTE SA (EXTINGUIDA)	Belgium	11	0	38	12	26	0	0	0	0	0	3.13244	0.777357	0.634216	-0.25827	0.130961	0.666667	-1.29153	8.4	6.38874	1.25	7.02031	3.44324	4.22689	0	1	0	1
AVANZA AGRUPACION PARA EL TRANSPORTE SA (EXTINGUIDA)	Brasil	11	0	53	11	42	0	0	0	0	0	3.89327	1.91931	0.602092	-0.25827	0.406583	0.25	-1.55102	9.3	1.70724	2.94	8.27046	3.44324	4.22689	0	1	0	1
AVANZA AGRUPACION PARA EL TRANSPORTE SA (EXTINGUIDA)	Bulgaria	11	0	13	2	11	0	0	0	0	0	3.36942	1.12444	0.190378	0.26461	0.191694	0.5	-0.790003	10.1	8.1765	6.25	6.88874	3.44324	4.22689	0	1	0	1
AVANZA AGRUPACION PARA EL TRANSPORTE SA (EXTINGUIDA)	Canada	11	0	23	2	21	0	0	0	0	0	3.81425	0.103029	0.79255	-0.25827	0.161496	0.166667	-1.29153	6.7	3.0366	2.9	7.50919	3.44324	4.22689	0	1	0	1
AVANZA AGRUPACION PARA EL TRANSPORTE SA (EXTINGUIDA)	Chile	11	0	49	12	37	0	0	0	0	0	4.03132	1.48778	0.490568	-3.86767	0.146208	0.416667	-1.55102	8	5.60687	5.71	7.21206	3.44324	4.22689	0	1	0	1
AVANZA AGRUPACION PARA EL TRANSPORTE SA (EXTINGUIDA)	China	11	0	44	6	38	0	0	0	0	0	3.98191	1.90078	1.11489	0.52605	1.8939	0.333333	1.26844	4.2	3.22686	10.2	9.11544	3.44324	4.22689	0	1	0	1
AVANZA AGRUPACION PARA EL TRANSPORTE SA (EXTINGUIDA)	Colombia	11	0	33	12	21	0	0	0	0	0	3.90663	1.54759	0.748636	-3.86767	0.629637	0.166667	-1.55102	12	8.29023	4.72	7.65269	3.44324	4.22689	0	1	0	1
AVANZA AGRUPACION PARA EL TRANSPORTE SA (EXTINGUIDA)	South Korea	11	0	10	0	10	0	0	0	0	0	4.00439	0.420141	0.172921	0.52605	0.19628	0.541667	-0.271032	3.7	0.900652	4.2	7.68389	3.44324	4.22689	0	1	0	1
AVANZA AGRUPACION PARA EL TRANSPORTE SA (EXTINGUIDA)	Costa Rica	11	0	15	6	9	0	0	0	0	0	3.93278	1.54875	0.662422	-3.86767	0.00206424	0	-1.55102	6.6	3.26941	5.91	6.63621	3.44324	4.22689	0	1	0	1
AVANZA AGRUPACION PARA EL TRANSPORTE SA (EXTINGUIDA)	Croacia	11	0	8	1	7	0	0	0	0	0	3.22565	1.27885	0.253946	0.26461	1.01215	0.666667	-1.55102	12.6	4.3578	4.28	6.64771	3.44324	4.22689	0	1	0	1
AVANZA AGRUPACION PARA EL TRANSPORTE SA (EXTINGUIDA)	Denmark	11	0	10	1	9	0	0	0	0	0	3.31418	0.590138	0.733766	0.26461	0.112828	0.166667	-1.04949	4.8	2.05207	3.05	6.73368	3.44324	4.22689	0	1	0	1
AVANZA AGRUPACION PARA EL TRANSPORTE SA (EXTINGUIDA)	Ecuador	11	0	18	5	13	0	0	0	0	0	3.95347	1.61213	0.825643	-3.38939	0.280888	0.133333	-1.55102	7.7	5.24269	4.74	7.12151	3.44324	4.22689	0	1	0	1
AVANZA AGRUPACION PARA EL TRANSPORTE SA (EXTINGUIDA)	El Salvador	11	0	12	2	10	0	0	0	0	0	3.94102	2.12139	0.718083	-3.86767	0.459103	0.666667	-1.55102	7.2	3.05173	2.75	6.83765	3.44324	4.22689	0	1	0	1
AVANZA AGRUPACION PARA EL TRANSPORTE SA (EXTINGUIDA)	Slovakia	11	0	13	1	12	0	0	0	0	0	3.29809	0.931708	0.0511288	0.26461	0.296655	0.333333	-1.29153	16.2	4.02343	6.04	6.73135	3.44324	4.22689	0	1	0	1
AVANZA AGRUPACION PARA EL TRANSPORTE SA (EXTINGUIDA)	Slovenia	11	0	6	0	6	0	0	0	0	0	3.20355	0.40353	0.182051	0.26461	0.101477	0.333333	-1.29153	6.5	1.4438	4.03	6.30114	3.44324	4.22689	0	1	0	1
AVANZA AGRUPACION PARA EL TRANSPORTE SA (EXTINGUIDA)	USA	11	0	74	13	61	0	0	0	0	0	3.87141	0.553655	1.26073	-0.69195	0.15745	0.166667	-1.29153	5.1	0.800894	3.2	8.47189	3.44324	4.22689	0	1	0	1
AVANZA AGRUPACION PARA EL TRANSPORTE SA (EXTINGUIDA)	Estonia	11	0	3	0	3	0	0	0	0	0	3.46571	0.927963	0.110104	0.26461	0.20986	0.666667	-0.530518	7.9	20.7518	10.47	6.12908	3.44324	4.22689	0	1	0	1
AVANZA AGRUPACION PARA EL TRANSPORTE SA (EXTINGUIDA)	Ethiopia	11	0	2	0	2	0	0	0	0	0	3.72911	2.78128	1.3431	0.26461	1.26883	0.333333	-0.530518	5.4	1.80247	10.2	7.85282	3.44324	4.22689	0	1	0	1
AVANZA AGRUPACION PARA EL TRANSPORTE SA (EXTINGUIDA)	Philippine	11	0	12	2	10	0	0	0	0	0	4.07154	1.53391	0.995918	0.26461	0.359399	0.208333	-1.55102	7.7	1.1508	4.97	7.91936	3.44324	4.22689	0	1	0	1
AVANZA AGRUPACION PARA EL TRANSPORTE SA (EXTINGUIDA)	Finland	11	0	9	2	7	0	0	0	0	0	3.48105	0.507403	0.679478	0.52605	0.114138	0.0833333	-1.04949	8.4	2.36125	2.09	6.71984	3.44324	4.22689	0	1	0	1
AVANZA AGRUPACION PARA EL TRANSPORTE SA (EXTINGUIDA)	France	11	0	80	16	64	0	0	0	0	0	2.98175	0.490732	0.583416	-0.25827	0.0417816	0.333333	-1.29153	8.9	2.98952	1.19	7.78442	3.44324	4.22689	0	1	0	1
AVANZA AGRUPACION PARA EL TRANSPORTE SA (EXTINGUIDA)	Greece	11	0	20	0	20	0	0	0	0	0	3.35976	0.538884	0.215795	0.26461	0.101199	0.166667	-1.04949	9.8	0.269531	3.66	7.04548	3.44324	4.22689	0	1	0	1
AVANZA AGRUPACION PARA EL TRANSPORTE SA (EXTINGUIDA)	The Netherlands	11	0	23	4	19	0	0	0	0	0	3.17633	0.566689	0.663452	0.26461	0.0980731	0	-1.29153	4.7	6.98972	1.13	7.21272	3.44324	4.22689	0	1	0	1
AVANZA AGRUPACION PARA EL TRANSPORTE SA (EXTINGUIDA)	Hungary	11	0	20	3	17	0	0	0	0	0	3.29217	1.2511	0.147629	0.52605	0.00651064	0	-1.29153	7.2	6.0699	4.25	7.00376	3.44324	4.22689	0	1	0	1
AVANZA AGRUPACION PARA EL TRANSPORTE SA (EXTINGUIDA)	India	11	0	18	1	17	0	0	0	0	0	3.88339	2.24326	1.22135	0.26461	0.405146	0.333333	1.26844	4.4	0.818883	9.23	9.03925	3.44324	4.22689	0	1	0	1
AVANZA AGRUPACION PARA EL TRANSPORTE SA (EXTINGUIDA)	Ireland	11	0	19	1	18	0	0	0	0	0	3.18256	0.764228	0.019023	0.26461	0.0741923	0.666667	-1.55102	4.3	-11.284	5.5	6.619	3.44324	4.22689	0	1	0	1
AVANZA AGRUPACION PARA EL TRANSPORTE SA (EXTINGUIDA)	Iceland	11	0	2	0	2	0	0	0	0	0	3.47432	0.957051	0.692716	0.26461	0.110148	0.666667	-1.04949	2.6	14.7276	5.53	5.47239	3.44324	4.22689	0	1	0	1
AVANZA AGRUPACION PARA EL TRANSPORTE SA (EXTINGUIDA)	Israel	11	0	9	2	7	0	0	0	0	0	3.54353	1.46344	0.103381	-0.21367	0.110461	0	1.01767	9	4.52632	5.17	6.84033	3.44324	4.22689	0	1	0	1
AVANZA AGRUPACION PARA EL TRANSPORTE SA (EXTINGUIDA)	Italy	11	0	65	13	52	0	0	0	0	0	3.12249	0.419623	0.297329	-0.25827	0.00573603	0.25	-1.29153	7.7	1.13309	-3.56	7.76795	3.44324	4.22689	0	1	0	1
AVANZA AGRUPACION PARA EL TRANSPORTE SA (EXTINGUIDA)	Japan	11	0	15	1	14	0	0	0	0	0	4.02876	0.661939	0.887715	0.52605	0.0207448	0.416667	1.26844	4.4	0.0612047	2.6	8.10644	3.44324	4.22689	0	1	0	1
AVANZA AGRUPACION PARA EL TRANSPORTE SA (EXTINGUIDA)	Latvia	11	0	3	0	3	0	0	0	0	0	3.43418	0.923385	0.149979	0.26461	0.312954	0.416667	-1.03204	8.9	3.9397	10.6	6.36182	3.44324	4.22689	0	1	0	1
AVANZA AGRUPACION PARA EL TRANSPORTE SA (EXTINGUIDA)	Lithuania	11	0	2	0	2	0	0	0	0	0	3.41598	0.941538	0.270507	0.26461	0.206518	0.25	-1.29153	8.3	3.93337	7.56	6.5333	3.44324	4.22689	0	1	0	1
AVANZA AGRUPACION PARA EL TRANSPORTE SA (EXTINGUIDA)	Luxembourg	11	0	8	1	7	0	0	0	0	0	3.11354	1.69208	0.929135	-0.25827	0.11085	0.166667	-1.55102	4.5	10.1045	4.03	5.65964	3.44324	4.22689	0	1	0	1
AVANZA AGRUPACION PARA EL TRANSPORTE SA (EXTINGUIDA)	Malta	11	0	3	1	2	0	0	0	0	0	3.20679	1.13972	0.366184	0.52605	0.130339	0.333333	-1.55102	7.3	10.5646	2.49	5.60584	3.44324	4.22689	0	1	0	1
AVANZA AGRUPACION PARA EL TRANSPORTE SA (EXTINGUIDA)	Morocco	11	0	40	6	34	0	0	0	0	0	2.94765	2.40856	0.965929	0.52605	1.13327	0.166667	1.27716	11	5.6818	1.72	7.47918	3.44324	4.22689	0	1	0	1
AVANZA AGRUPACION PARA EL TRANSPORTE SA (EXTINGUIDA)	Mexico	11	0	68	17	51	0	0	0	0	0	3.96116	1.61593	0.61242	-3.86767	0.803904	0.333333	-1.55102	3.5	2.35186	2.8	8.01321	3.44324	4.22689	0	1	0	1
AVANZA AGRUPACION PARA EL TRANSPORTE SA (EXTINGUIDA)	Nigeria	11	0	2	0	2	0	0	0	0	0	3.5664	2.38172	1.08093	0.26461	1.74765	0.666667	-0.530518	5.6	3.50758	6.1	8.15031	3.44324	4.22689	0	1	0	1
AVANZA AGRUPACION PARA EL TRANSPORTE SA (EXTINGUIDA)	Norway	11	0	10	1	9	0	0	0	0	0	3.39007	0.558513	0.773884	0.26461	0.110833	0.166667	-1.04949	4.6	1.15494	2.26	6.66495	3.44324	4.22689	0	1	0	1
AVANZA AGRUPACION PARA EL TRANSPORTE SA (EXTINGUIDA)	New Zealand	11	0	2	0	2	0	0	0	0	0	4.2904	0.485975	0.553697	0.26461	0.0975475	0.666667	-0.790003	3.8	1.46672	1.9	6.61267	3.44324	4.22689	0	1	0	1
AVANZA AGRUPACION PARA EL TRANSPORTE SA (EXTINGUIDA)	Panama	11	0	24	6	18	0	0	0	0	0	3.91924	1.43673	0.720964	-3.38939	0.445543	0.666667	-1.29153	9.8	4.37245	6.91	6.5094	3.44324	4.22689	0	1	0	1
AVANZA AGRUPACION PARA EL TRANSPORTE SA (EXTINGUIDA)	Peru	11	0	33	11	22	0	0	0	0	0	3.97657	1.42631	0.798443	-3.38939	0.983327	0.666667	-1.55102	5.2	3.2493	6.45	7.44667	3.44324	4.22689	0	1	0	1
AVANZA AGRUPACION PARA EL TRANSPORTE SA (EXTINGUIDA)	Poland	11	0	53	5	48	0	0	0	0	0	3.33558	1.19959	0.38872	0.26461	0.0799061	0.25	-1.29153	17.7	2.54782	3.55	7.58167	3.44324	4.22689	0	1	0	1
AVANZA AGRUPACION PARA EL TRANSPORTE SA (EXTINGUIDA)	Portugal	11	1	102	24	78	0	0	0	0	0	2.8324	0.769779	0.315828	-0.25827	0.0980653	0.166667	-1.29153	7.6	1.69826	0.37	7.02323	3.44324	4.22689	0	1	0	1
AVANZA AGRUPACION PARA EL TRANSPORTE SA (EXTINGUIDA)	UK	11	0	68	16	52	0	0	0	0	0	3.15698	0.805554	0.679132	0.26461	0.00306242	0.5	-0.790003	4.7	7.47323	1.82	7.77979	3.44324	4.22689	0	1	0	1
AVANZA AGRUPACION PARA EL TRANSPORTE SA (EXTINGUIDA)	Czech Republic	11	0	28	3	25	0	0	0	0	0	3.26204	0.685613	0.00167352	0.26461	0.00949857	0.666667	-1.03204	7.9	8.86508	6.08	7.01005	3.44324	4.22689	0	1	0	1
AVANZA AGRUPACION PARA EL TRANSPORTE SA (EXTINGUIDA)	Romania	11	0	20	4	16	0	0	0	0	0	3.37913	1.01845	0.52496	-0.25827	0.348609	0.5	-0.790003	7.2	6.46266	4.1	7.33514	3.44324	4.22689	0	1	0	1
AVANZA AGRUPACION PARA EL TRANSPORTE SA (EXTINGUIDA)	Rusia	11	0	24	2	22	0	0	0	0	0	3.62123	0.696054	0.111071	0.26461	0.792843	0.666667	-0.790003	7.1	1.90974	6.4	8.15568	3.44324	4.22689	0	1	0	1
AVANZA AGRUPACION PARA EL TRANSPORTE SA (EXTINGUIDA)	Serbia	11	0	7	0	7	0	0	0	0	0	3.30011	1.33787	0.652569	0.26461	1.71416	0.333333	-0.790003	20.8	5.64939	4.68	6.90656	3.44324	4.22689	0	1	0	1
AVANZA AGRUPACION PARA EL TRANSPORTE SA (EXTINGUIDA)	Singapur	11	0	13	2	11	0	0	0	0	0	4.05448	1.4349	0.479333	0.26461	1.00484	0.666667	1.00895	4.1	17.2101	6.62	6.63767	3.44324	4.22689	0	1	0	1
AVANZA AGRUPACION PARA EL TRANSPORTE SA (EXTINGUIDA)	South Africa	11	0	14	3	11	0	0	0	0	0	3.91822	1.72008	0.6954	0.26461	0.167296	0	-0.790003	23.8	2.63118	5.1	7.67106	3.44324	4.22689	0	1	0	1
AVANZA AGRUPACION PARA EL TRANSPORTE SA (EXTINGUIDA)	Sweden	11	0	15	2	13	0	0	0	0	0	3.3956	0.90496	0.81257	0.26461	0.108496	0	-0.790003	7.7	3.74326	2.7	6.9554	3.44324	4.22689	0	1	0	1
AVANZA AGRUPACION PARA EL TRANSPORTE SA (EXTINGUIDA)	Switzerland	11	0	18	5	13	0	0	0	0	0	3.91415	0.836495	0.694867	-0.21367	0.150978	0.166667	-1.55102	4.4	1.57889	1.9	6.8714	3.44324	4.22689	0	1	0	1
AVANZA AGRUPACION PARA EL TRANSPORTE SA (EXTINGUIDA)	Thailand	11	0	14	2	12	0	0	0	0	0	4.00637	1.44759	1.08846	0.52605	0.353899	0.666667	1.26844	1.3	2.09225	4.49	7.80776	3.44324	4.22689	0	1	0	1
AVANZA AGRUPACION PARA EL TRANSPORTE SA (EXTINGUIDA)	Turquia	11	0	18	1	17	0	0	0	0	0	3.47222	1.60088	0.7561	0.52605	0.628774	0.666667	1.27716	10.6	2.66423	7.38	7.85772	3.44324	4.22689	0	1	0	1
AVANZA AGRUPACION PARA EL TRANSPORTE SA (EXTINGUIDA)	Uruguay	11	0	23	9	14	0	0	0	0	0	3.99607	1.1487	0.233146	-3.86767	0.14597	0.666667	-1.29153	12.2	3.61146	6.56	6.51927	3.44324	4.22689	0	1	0	1
AVANZA AGRUPACION PARA EL TRANSPORTE SA (EXTINGUIDA)	Venezuela	11	0	31	9	22	0	0	0	0	0	3.8557	1.76796	0.336214	-3.86767	0.309872	0.166667	-1.55102	11.4	2.04181	10.33	7.42451	3.44324	4.22689	0	1	0	1
AVANZIT SA	Germany	12	0	56	4	52	0	0	0	1	0	3.21148	0.536164	0.562607	0.26461	0.0541978	0.666667	-1.29153	11.1	1.16865	0.96	7.91629	3.53244	1.71484	1	0	1	12
AVANZIT SA	Argentina	12	1	61	6	55	0	0	0	1	0	4.00345	1.28036	0.249754	-3.86767	0.279269	0.666667	-1.55102	10.6	2.54485	9.18	7.58824	3.53244	1.71484	1	0	1	12
AVANZIT SA	Australia	12	0	18	0	18	0	0	0	1	0	4.23231	0.567562	0.721527	0.26461	0.165512	0	-1.29153	5	-4.71452	2.8	7.30812	3.53244	1.71484	1	0	1	12
AVANZIT SA	Austria	12	0	13	0	13	0	0	0	1	0	3.23123	0.588788	0.518591	0.26461	0.0931028	0.333333	-1.55102	5.2	2.91401	1.8	6.91557	3.53244	1.71484	1	0	1	12
AVANZIT SA	Bangladesh	12	0	2	0	2	0	0	0	1	0	3.93561	2.63734	1.3076	0.26461	0.590559	0.333333	1.27716	4.3	1.15269	5.96	8.15174	3.53244	1.71484	1	0	1	12
AVANZIT SA	Belgium	12	0	38	2	36	0	0	0	1	0	3.13244	0.777357	0.634216	-0.25827	0.130961	0.666667	-1.29153	8.4	6.38874	1.25	7.02031	3.53244	1.71484	1	0	1	12
AVANZIT SA	Brasil	12	1	53	7	46	0	0	0	1	0	3.89327	1.91931	0.602092	-0.25827	0.406583	0.25	-1.55102	9.3	1.70724	2.94	8.27046	3.53244	1.71484	1	0	1	12
AVANZIT SA	Bulgaria	12	0	13	1	12	0	0	0	1	0	3.36942	1.12444	0.190378	0.26461	0.191694	0.5	-0.790003	10.1	8.1765	6.25	6.88874	3.53244	1.71484	1	0	1	12
AVANZIT SA	Canada	12	0	23	3	20	0	0	0	1	0	3.81425	0.103029	0.79255	-0.25827	0.161496	0.166667	-1.29153	6.7	3.0366	2.9	7.50919	3.53244	1.71484	1	0	1	12
AVANZIT SA	Chile	12	1	49	7	42	0	0	0	1	0	4.03132	1.48778	0.490568	-3.86767	0.146208	0.416667	-1.55102	8	5.60687	5.71	7.21206	3.53244	1.71484	1	0	1	12
AVANZIT SA	China	12	0	44	1	43	0	0	0	1	0	3.98191	1.90078	1.11489	0.52605	1.8939	0.333333	1.26844	4.2	3.22686	10.2	9.11544	3.53244	1.71484	1	0	1	12
AVANZIT SA	Colombia	12	1	33	8	25	0	0	0	1	0	3.90663	1.54759	0.748636	-3.86767	0.629637	0.166667	-1.55102	12	8.29023	4.72	7.65269	3.53244	1.71484	1	0	1	12
AVANZIT SA	South Korea	12	0	10	0	10	0	0	0	1	0	4.00439	0.420141	0.172921	0.52605	0.19628	0.541667	-0.271032	3.7	0.900652	4.2	7.68389	3.53244	1.71484	1	0	1	12
AVANZIT SA	Costa Rica	12	0	15	2	13	0	0	0	1	0	3.93278	1.54875	0.662422	-3.86767	0.00206424	0	-1.55102	6.6	3.26941	5.91	6.63621	3.53244	1.71484	1	0	1	12
AVANZIT SA	Croacia	12	0	8	0	8	0	0	0	1	0	3.22565	1.27885	0.253946	0.26461	1.01215	0.666667	-1.55102	12.6	4.3578	4.28	6.64771	3.53244	1.71484	1	0	1	12
AVANZIT SA	Denmark	12	0	10	2	8	0	0	0	1	0	3.31418	0.590138	0.733766	0.26461	0.112828	0.166667	-1.04949	4.8	2.05207	3.05	6.73368	3.53244	1.71484	1	0	1	12
AVANZIT SA	Ecuador	12	1	18	4	14	0	0	0	1	0	3.95347	1.61213	0.825643	-3.38939	0.280888	0.133333	-1.55102	7.7	5.24269	4.74	7.12151	3.53244	1.71484	1	0	1	12
AVANZIT SA	El Salvador	12	1	12	2	10	0	0	0	1	0	3.94102	2.12139	0.718083	-3.86767	0.459103	0.666667	-1.55102	7.2	3.05173	2.75	6.83765	3.53244	1.71484	1	0	1	12
AVANZIT SA	Slovakia	12	0	13	2	11	0	0	0	1	0	3.29809	0.931708	0.0511288	0.26461	0.296655	0.333333	-1.29153	16.2	4.02343	6.04	6.73135	3.53244	1.71484	1	0	1	12
AVANZIT SA	Slovenia	12	0	6	0	6	0	0	0	1	0	3.20355	0.40353	0.182051	0.26461	0.101477	0.333333	-1.29153	6.5	1.4438	4.03	6.30114	3.53244	1.71484	1	0	1	12
AVANZIT SA	USA	12	0	74	4	70	0	0	0	1	0	3.87141	0.553655	1.26073	-0.69195	0.15745	0.166667	-1.29153	5.1	0.800894	3.2	8.47189	3.53244	1.71484	1	0	1	12
AVANZIT SA	Estonia	12	0	3	1	2	0	0	0	1	0	3.46571	0.927963	0.110104	0.26461	0.20986	0.666667	-0.530518	7.9	20.7518	10.47	6.12908	3.53244	1.71484	1	0	1	12
AVANZIT SA	Ethiopia	12	0	2	0	2	0	0	0	1	0	3.72911	2.78128	1.3431	0.26461	1.26883	0.333333	-0.530518	5.4	1.80247	10.2	7.85282	3.53244	1.71484	1	0	1	12
AVANZIT SA	Philippine	12	0	12	0	12	0	0	0	1	0	4.07154	1.53391	0.995918	0.26461	0.359399	0.208333	-1.55102	7.7	1.1508	4.97	7.91936	3.53244	1.71484	1	0	1	12
AVANZIT SA	Finland	12	0	9	1	8	0	0	0	1	0	3.48105	0.507403	0.679478	0.52605	0.114138	0.0833333	-1.04949	8.4	2.36125	2.09	6.71984	3.53244	1.71484	1	0	1	12
AVANZIT SA	France	12	0	80	3	77	0	0	0	1	0	2.98175	0.490732	0.583416	-0.25827	0.0417816	0.333333	-1.29153	8.9	2.98952	1.19	7.78442	3.53244	1.71484	1	0	1	12
AVANZIT SA	Greece	12	0	20	3	17	0	0	0	1	0	3.35976	0.538884	0.215795	0.26461	0.101199	0.166667	-1.04949	9.8	0.269531	3.66	7.04548	3.53244	1.71484	1	0	1	12
AVANZIT SA	The Netherlands	12	0	23	1	22	0	0	0	1	0	3.17633	0.566689	0.663452	0.26461	0.0980731	0	-1.29153	4.7	6.98972	1.13	7.21272	3.53244	1.71484	1	0	1	12
AVANZIT SA	Hungary	12	0	20	1	19	0	0	0	1	0	3.29217	1.2511	0.147629	0.52605	0.00651064	0	-1.29153	7.2	6.0699	4.25	7.00376	3.53244	1.71484	1	0	1	12
AVANZIT SA	India	12	0	18	2	16	0	0	0	1	0	3.88339	2.24326	1.22135	0.26461	0.405146	0.333333	1.26844	4.4	0.818883	9.23	9.03925	3.53244	1.71484	1	0	1	12
AVANZIT SA	Ireland	12	0	19	3	16	0	0	0	1	0	3.18256	0.764228	0.019023	0.26461	0.0741923	0.666667	-1.55102	4.3	-11.284	5.5	6.619	3.53244	1.71484	1	0	1	12
AVANZIT SA	Iceland	12	0	2	0	2	0	0	0	1	0	3.47432	0.957051	0.692716	0.26461	0.110148	0.666667	-1.04949	2.6	14.7276	5.53	5.47239	3.53244	1.71484	1	0	1	12
AVANZIT SA	Israel	12	0	9	1	8	0	0	0	1	0	3.54353	1.46344	0.103381	-0.21367	0.110461	0	1.01767	9	4.52632	5.17	6.84033	3.53244	1.71484	1	0	1	12
AVANZIT SA	Italy	12	0	65	5	60	0	0	0	1	0	3.12249	0.419623	0.297329	-0.25827	0.00573603	0.25	-1.29153	7.7	1.13309	-3.56	7.76795	3.53244	1.71484	1	0	1	12
AVANZIT SA	Japan	12	0	15	0	15	0	0	0	1	0	4.02876	0.661939	0.887715	0.52605	0.0207448	0.416667	1.26844	4.4	0.0612047	2.6	8.10644	3.53244	1.71484	1	0	1	12
AVANZIT SA	Latvia	12	0	3	1	2	0	0	0	1	0	3.43418	0.923385	0.149979	0.26461	0.312954	0.416667	-1.03204	8.9	3.9397	10.6	6.36182	3.53244	1.71484	1	0	1	12
AVANZIT SA	Lithuania	12	0	2	0	2	0	0	0	1	0	3.41598	0.941538	0.270507	0.26461	0.206518	0.25	-1.29153	8.3	3.93337	7.56	6.5333	3.53244	1.71484	1	0	1	12
AVANZIT SA	Luxembourg	12	0	8	0	8	0	0	0	1	0	3.11354	1.69208	0.929135	-0.25827	0.11085	0.166667	-1.55102	4.5	10.1045	4.03	5.65964	3.53244	1.71484	1	0	1	12
AVANZIT SA	Malta	12	0	3	0	3	0	0	0	1	0	3.20679	1.13972	0.366184	0.52605	0.130339	0.333333	-1.55102	7.3	10.5646	2.49	5.60584	3.53244	1.71484	1	0	1	12
AVANZIT SA	Morocco	12	1	40	4	36	0	0	0	1	0	2.94765	2.40856	0.965929	0.52605	1.13327	0.166667	1.27716	11	5.6818	1.72	7.47918	3.53244	1.71484	1	0	1	12
AVANZIT SA	Mexico	12	1	68	8	60	0	0	0	1	0	3.96116	1.61593	0.61242	-3.86767	0.803904	0.333333	-1.55102	3.5	2.35186	2.8	8.01321	3.53244	1.71484	1	0	1	12
AVANZIT SA	Nigeria	12	0	2	1	1	0	0	0	1	0	3.5664	2.38172	1.08093	0.26461	1.74765	0.666667	-0.530518	5.6	3.50758	6.1	8.15031	3.53244	1.71484	1	0	1	12
AVANZIT SA	Norway	12	0	10	0	10	0	0	0	1	0	3.39007	0.558513	0.773884	0.26461	0.110833	0.166667	-1.04949	4.6	1.15494	2.26	6.66495	3.53244	1.71484	1	0	1	12
AVANZIT SA	New Zealand	12	0	2	0	2	0	0	0	1	0	4.2904	0.485975	0.553697	0.26461	0.0975475	0.666667	-0.790003	3.8	1.46672	1.9	6.61267	3.53244	1.71484	1	0	1	12
AVANZIT SA	Panama	12	0	24	4	20	0	0	0	1	0	3.91924	1.43673	0.720964	-3.38939	0.445543	0.666667	-1.29153	9.8	4.37245	6.91	6.5094	3.53244	1.71484	1	0	1	12
AVANZIT SA	Peru	12	1	33	6	27	0	0	0	1	0	3.97657	1.42631	0.798443	-3.38939	0.983327	0.666667	-1.55102	5.2	3.2493	6.45	7.44667	3.53244	1.71484	1	0	1	12
AVANZIT SA	Poland	12	0	53	2	51	0	0	0	1	0	3.33558	1.19959	0.38872	0.26461	0.0799061	0.25	-1.29153	17.7	2.54782	3.55	7.58167	3.53244	1.71484	1	0	1	12
AVANZIT SA	Portugal	12	1	102	8	94	0	0	0	1	0	2.8324	0.769779	0.315828	-0.25827	0.0980653	0.166667	-1.29153	7.6	1.69826	0.37	7.02323	3.53244	1.71484	1	0	1	12
AVANZIT SA	UK	12	0	68	5	63	0	0	0	1	0	3.15698	0.805554	0.679132	0.26461	0.00306242	0.5	-0.790003	4.7	7.47323	1.82	7.77979	3.53244	1.71484	1	0	1	12
AVANZIT SA	Czech Republic	12	0	28	1	27	0	0	0	1	0	3.26204	0.685613	0.00167352	0.26461	0.00949857	0.666667	-1.03204	7.9	8.86508	6.08	7.01005	3.53244	1.71484	1	0	1	12
AVANZIT SA	Romania	12	0	20	0	20	0	0	0	1	0	3.37913	1.01845	0.52496	-0.25827	0.348609	0.5	-0.790003	7.2	6.46266	4.1	7.33514	3.53244	1.71484	1	0	1	12
AVANZIT SA	Rusia	12	0	24	2	22	0	0	0	1	0	3.62123	0.696054	0.111071	0.26461	0.792843	0.666667	-0.790003	7.1	1.90974	6.4	8.15568	3.53244	1.71484	1	0	1	12
AVANZIT SA	Serbia	12	0	7	0	7	0	0	0	1	0	3.30011	1.33787	0.652569	0.26461	1.71416	0.333333	-0.790003	20.8	5.64939	4.68	6.90656	3.53244	1.71484	1	0	1	12
AVANZIT SA	Singapur	12	0	13	0	13	0	0	0	1	0	4.05448	1.4349	0.479333	0.26461	1.00484	0.666667	1.00895	4.1	17.2101	6.62	6.63767	3.53244	1.71484	1	0	1	12
AVANZIT SA	South Africa	12	0	14	1	13	0	0	0	1	0	3.91822	1.72008	0.6954	0.26461	0.167296	0	-0.790003	23.8	2.63118	5.1	7.67106	3.53244	1.71484	1	0	1	12
AVANZIT SA	Sweden	12	0	15	1	14	0	0	0	1	0	3.3956	0.90496	0.81257	0.26461	0.108496	0	-0.790003	7.7	3.74326	2.7	6.9554	3.53244	1.71484	1	0	1	12
AVANZIT SA	Switzerland	12	0	18	1	17	0	0	0	1	0	3.91415	0.836495	0.694867	-0.21367	0.150978	0.166667	-1.55102	4.4	1.57889	1.9	6.8714	3.53244	1.71484	1	0	1	12
AVANZIT SA	Thailand	12	0	14	0	14	0	0	0	1	0	4.00637	1.44759	1.08846	0.52605	0.353899	0.666667	1.26844	1.3	2.09225	4.49	7.80776	3.53244	1.71484	1	0	1	12
AVANZIT SA	Turquia	12	0	18	1	17	0	0	0	1	0	3.47222	1.60088	0.7561	0.52605	0.628774	0.666667	1.27716	10.6	2.66423	7.38	7.85772	3.53244	1.71484	1	0	1	12
AVANZIT SA	Uruguay	12	0	23	1	22	0	0	0	1	0	3.99607	1.1487	0.233146	-3.86767	0.14597	0.666667	-1.29153	12.2	3.61146	6.56	6.51927	3.53244	1.71484	1	0	1	12
AVANZIT SA	Venezuela	12	0	31	4	27	0	0	0	1	0	3.8557	1.76796	0.336214	-3.86767	0.309872	0.166667	-1.55102	11.4	2.04181	10.33	7.42451	3.53244	1.71484	1	0	1	12
AZKOYEN SA	Germany	13	0	56	29	27	1	0	0	0	0	3.21148	0.536164	0.562607	0.26461	0.0541978	0.666667	-1.29153	11.1	1.16865	0.96	7.91629	2.93944	6.39848	1	0	1	5
AZKOYEN SA	Argentina	13	0	61	22	39	1	0	0	0	0	4.00345	1.28036	0.249754	-3.86767	0.279269	0.666667	-1.55102	10.6	2.54485	9.18	7.58824	2.93944	6.39848	1	0	1	5
AZKOYEN SA	Australia	13	0	18	12	6	1	0	0	0	0	4.23231	0.567562	0.721527	0.26461	0.165512	0	-1.29153	5	-4.71452	2.8	7.30812	2.93944	6.39848	1	0	1	5
AZKOYEN SA	Austria	13	0	13	10	3	1	0	0	0	0	3.23123	0.588788	0.518591	0.26461	0.0931028	0.333333	-1.55102	5.2	2.91401	1.8	6.91557	2.93944	6.39848	1	0	1	5
AZKOYEN SA	Bangladesh	13	0	2	1	1	1	0	0	0	0	3.93561	2.63734	1.3076	0.26461	0.590559	0.333333	1.27716	4.3	1.15269	5.96	8.15174	2.93944	6.39848	1	0	1	5
AZKOYEN SA	Belgium	13	0	38	15	23	1	0	0	0	0	3.13244	0.777357	0.634216	-0.25827	0.130961	0.666667	-1.29153	8.4	6.38874	1.25	7.02031	2.93944	6.39848	1	0	1	5
AZKOYEN SA	Brasil	13	0	53	24	29	1	0	0	0	0	3.89327	1.91931	0.602092	-0.25827	0.406583	0.25	-1.55102	9.3	1.70724	2.94	8.27046	2.93944	6.39848	1	0	1	5
AZKOYEN SA	Bulgaria	13	0	13	5	8	1	0	0	0	0	3.36942	1.12444	0.190378	0.26461	0.191694	0.5	-0.790003	10.1	8.1765	6.25	6.88874	2.93944	6.39848	1	0	1	5
AZKOYEN SA	Canada	13	0	23	11	12	1	0	0	0	0	3.81425	0.103029	0.79255	-0.25827	0.161496	0.166667	-1.29153	6.7	3.0366	2.9	7.50919	2.93944	6.39848	1	0	1	5
AZKOYEN SA	Chile	13	0	49	17	32	1	0	0	0	0	4.03132	1.48778	0.490568	-3.86767	0.146208	0.416667	-1.55102	8	5.60687	5.71	7.21206	2.93944	6.39848	1	0	1	5
AZKOYEN SA	China	13	0	44	28	16	1	0	0	0	0	3.98191	1.90078	1.11489	0.52605	1.8939	0.333333	1.26844	4.2	3.22686	10.2	9.11544	2.93944	6.39848	1	0	1	5
AZKOYEN SA	Colombia	13	0	33	7	26	1	0	0	0	0	3.90663	1.54759	0.748636	-3.86767	0.629637	0.166667	-1.55102	12	8.29023	4.72	7.65269	2.93944	6.39848	1	0	1	5
AZKOYEN SA	South Korea	13	0	10	9	1	1	0	0	0	0	4.00439	0.420141	0.172921	0.52605	0.19628	0.541667	-0.271032	3.7	0.900652	4.2	7.68389	2.93944	6.39848	1	0	1	5
AZKOYEN SA	Costa Rica	13	0	15	4	11	1	0	0	0	0	3.93278	1.54875	0.662422	-3.86767	0.00206424	0	-1.55102	6.6	3.26941	5.91	6.63621	2.93944	6.39848	1	0	1	5
AZKOYEN SA	Croacia	13	0	8	5	3	1	0	0	0	0	3.22565	1.27885	0.253946	0.26461	1.01215	0.666667	-1.55102	12.6	4.3578	4.28	6.64771	2.93944	6.39848	1	0	1	5
AZKOYEN SA	Denmark	13	0	10	6	4	1	0	0	0	0	3.31418	0.590138	0.733766	0.26461	0.112828	0.166667	-1.04949	4.8	2.05207	3.05	6.73368	2.93944	6.39848	1	0	1	5
AZKOYEN SA	Ecuador	13	0	18	4	14	1	0	0	0	0	3.95347	1.61213	0.825643	-3.38939	0.280888	0.133333	-1.55102	7.7	5.24269	4.74	7.12151	2.93944	6.39848	1	0	1	5
AZKOYEN SA	El Salvador	13	0	12	4	8	1	0	0	0	0	3.94102	2.12139	0.718083	-3.86767	0.459103	0.666667	-1.55102	7.2	3.05173	2.75	6.83765	2.93944	6.39848	1	0	1	5
AZKOYEN SA	Slovakia	13	0	13	9	4	1	0	0	0	0	3.29809	0.931708	0.0511288	0.26461	0.296655	0.333333	-1.29153	16.2	4.02343	6.04	6.73135	2.93944	6.39848	1	0	1	5
AZKOYEN SA	Slovenia	13	0	6	5	1	1	0	0	0	0	3.20355	0.40353	0.182051	0.26461	0.101477	0.333333	-1.29153	6.5	1.4438	4.03	6.30114	2.93944	6.39848	1	0	1	5
AZKOYEN SA	USA	13	0	74	32	42	1	0	0	0	0	3.87141	0.553655	1.26073	-0.69195	0.15745	0.166667	-1.29153	5.1	0.800894	3.2	8.47189	2.93944	6.39848	1	0	1	5
AZKOYEN SA	Estonia	13	0	3	2	1	1	0	0	0	0	3.46571	0.927963	0.110104	0.26461	0.20986	0.666667	-0.530518	7.9	20.7518	10.47	6.12908	2.93944	6.39848	1	0	1	5
AZKOYEN SA	Ethiopia	13	0	2	0	2	1	0	0	0	0	3.72911	2.78128	1.3431	0.26461	1.26883	0.333333	-0.530518	5.4	1.80247	10.2	7.85282	2.93944	6.39848	1	0	1	5
AZKOYEN SA	Philippine	13	0	12	8	4	1	0	0	0	0	4.07154	1.53391	0.995918	0.26461	0.359399	0.208333	-1.55102	7.7	1.1508	4.97	7.91936	2.93944	6.39848	1	0	1	5
AZKOYEN SA	Finland	13	0	9	5	4	1	0	0	0	0	3.48105	0.507403	0.679478	0.52605	0.114138	0.0833333	-1.04949	8.4	2.36125	2.09	6.71984	2.93944	6.39848	1	0	1	5
AZKOYEN SA	France	13	1	80	38	42	1	0	0	0	0	2.98175	0.490732	0.583416	-0.25827	0.0417816	0.333333	-1.29153	8.9	2.98952	1.19	7.78442	2.93944	6.39848	1	0	1	5
AZKOYEN SA	Greece	13	0	20	11	9	1	0	0	0	0	3.35976	0.538884	0.215795	0.26461	0.101199	0.166667	-1.04949	9.8	0.269531	3.66	7.04548	2.93944	6.39848	1	0	1	5
AZKOYEN SA	The Netherlands	13	1	23	15	8	1	0	0	0	0	3.17633	0.566689	0.663452	0.26461	0.0980731	0	-1.29153	4.7	6.98972	1.13	7.21272	2.93944	6.39848	1	0	1	5
AZKOYEN SA	Hungary	13	0	20	12	8	1	0	0	0	0	3.29217	1.2511	0.147629	0.52605	0.00651064	0	-1.29153	7.2	6.0699	4.25	7.00376	2.93944	6.39848	1	0	1	5
AZKOYEN SA	India	13	0	18	11	7	1	0	0	0	0	3.88339	2.24326	1.22135	0.26461	0.405146	0.333333	1.26844	4.4	0.818883	9.23	9.03925	2.93944	6.39848	1	0	1	5
AZKOYEN SA	Ireland	13	0	19	7	12	1	0	0	0	0	3.18256	0.764228	0.019023	0.26461	0.0741923	0.666667	-1.55102	4.3	-11.284	5.5	6.619	2.93944	6.39848	1	0	1	5
AZKOYEN SA	Iceland	13	0	2	2	0	1	0	0	0	0	3.47432	0.957051	0.692716	0.26461	0.110148	0.666667	-1.04949	2.6	14.7276	5.53	5.47239	2.93944	6.39848	1	0	1	5
AZKOYEN SA	Israel	13	0	9	4	5	1	0	0	0	0	3.54353	1.46344	0.103381	-0.21367	0.110461	0	1.01767	9	4.52632	5.17	6.84033	2.93944	6.39848	1	0	1	5
AZKOYEN SA	Italy	13	1	65	33	32	1	0	0	0	0	3.12249	0.419623	0.297329	-0.25827	0.00573603	0.25	-1.29153	7.7	1.13309	-3.56	7.76795	2.93944	6.39848	1	0	1	5
AZKOYEN SA	Japan	13	0	15	10	5	1	0	0	0	0	4.02876	0.661939	0.887715	0.52605	0.0207448	0.416667	1.26844	4.4	0.0612047	2.6	8.10644	2.93944	6.39848	1	0	1	5
AZKOYEN SA	Latvia	13	0	3	2	1	1	0	0	0	0	3.43418	0.923385	0.149979	0.26461	0.312954	0.416667	-1.03204	8.9	3.9397	10.6	6.36182	2.93944	6.39848	1	0	1	5
AZKOYEN SA	Lithuania	13	0	2	2	0	1	0	0	0	0	3.41598	0.941538	0.270507	0.26461	0.206518	0.25	-1.29153	8.3	3.93337	7.56	6.5333	2.93944	6.39848	1	0	1	5
AZKOYEN SA	Luxembourg	13	0	8	6	2	1	0	0	0	0	3.11354	1.69208	0.929135	-0.25827	0.11085	0.166667	-1.55102	4.5	10.1045	4.03	5.65964	2.93944	6.39848	1	0	1	5
AZKOYEN SA	Malta	13	0	3	2	1	1	0	0	0	0	3.20679	1.13972	0.366184	0.52605	0.130339	0.333333	-1.55102	7.3	10.5646	2.49	5.60584	2.93944	6.39848	1	0	1	5
AZKOYEN SA	Morocco	13	0	40	20	20	1	0	0	0	0	2.94765	2.40856	0.965929	0.52605	1.13327	0.166667	1.27716	11	5.6818	1.72	7.47918	2.93944	6.39848	1	0	1	5
AZKOYEN SA	Mexico	13	0	68	26	42	1	0	0	0	0	3.96116	1.61593	0.61242	-3.86767	0.803904	0.333333	-1.55102	3.5	2.35186	2.8	8.01321	2.93944	6.39848	1	0	1	5
AZKOYEN SA	Nigeria	13	0	2	1	1	1	0	0	0	0	3.5664	2.38172	1.08093	0.26461	1.74765	0.666667	-0.530518	5.6	3.50758	6.1	8.15031	2.93944	6.39848	1	0	1	5
AZKOYEN SA	Norway	13	0	10	8	2	1	0	0	0	0	3.39007	0.558513	0.773884	0.26461	0.110833	0.166667	-1.04949	4.6	1.15494	2.26	6.66495	2.93944	6.39848	1	0	1	5
AZKOYEN SA	New Zealand	13	0	2	2	0	1	0	0	0	0	4.2904	0.485975	0.553697	0.26461	0.0975475	0.666667	-0.790003	3.8	1.46672	1.9	6.61267	2.93944	6.39848	1	0	1	5
AZKOYEN SA	Panama	13	0	24	7	17	1	0	0	0	0	3.91924	1.43673	0.720964	-3.38939	0.445543	0.666667	-1.29153	9.8	4.37245	6.91	6.5094	2.93944	6.39848	1	0	1	5
AZKOYEN SA	Peru	13	0	33	8	25	1	0	0	0	0	3.97657	1.42631	0.798443	-3.38939	0.983327	0.666667	-1.55102	5.2	3.2493	6.45	7.44667	2.93944	6.39848	1	0	1	5
AZKOYEN SA	Poland	13	0	53	27	26	1	0	0	0	0	3.33558	1.19959	0.38872	0.26461	0.0799061	0.25	-1.29153	17.7	2.54782	3.55	7.58167	2.93944	6.39848	1	0	1	5
AZKOYEN SA	Portugal	13	1	102	38	64	1	0	0	0	0	2.8324	0.769779	0.315828	-0.25827	0.0980653	0.166667	-1.29153	7.6	1.69826	0.37	7.02323	2.93944	6.39848	1	0	1	5
AZKOYEN SA	UK	13	1	68	27	41	1	0	0	0	0	3.15698	0.805554	0.679132	0.26461	0.00306242	0.5	-0.790003	4.7	7.47323	1.82	7.77979	2.93944	6.39848	1	0	1	5
AZKOYEN SA	Czech Republic	13	0	28	18	10	1	0	0	0	0	3.26204	0.685613	0.00167352	0.26461	0.00949857	0.666667	-1.03204	7.9	8.86508	6.08	7.01005	2.93944	6.39848	1	0	1	5
AZKOYEN SA	Romania	13	0	20	9	11	1	0	0	0	0	3.37913	1.01845	0.52496	-0.25827	0.348609	0.5	-0.790003	7.2	6.46266	4.1	7.33514	2.93944	6.39848	1	0	1	5
AZKOYEN SA	Rusia	13	0	24	16	8	1	0	0	0	0	3.62123	0.696054	0.111071	0.26461	0.792843	0.666667	-0.790003	7.1	1.90974	6.4	8.15568	2.93944	6.39848	1	0	1	5
AZKOYEN SA	Serbia	13	0	7	4	3	1	0	0	0	0	3.30011	1.33787	0.652569	0.26461	1.71416	0.333333	-0.790003	20.8	5.64939	4.68	6.90656	2.93944	6.39848	1	0	1	5
AZKOYEN SA	Singapur	13	0	13	10	3	1	0	0	0	0	4.05448	1.4349	0.479333	0.26461	1.00484	0.666667	1.00895	4.1	17.2101	6.62	6.63767	2.93944	6.39848	1	0	1	5
AZKOYEN SA	South Africa	13	0	14	6	8	1	0	0	0	0	3.91822	1.72008	0.6954	0.26461	0.167296	0	-0.790003	23.8	2.63118	5.1	7.67106	2.93944	6.39848	1	0	1	5
AZKOYEN SA	Sweden	13	0	15	9	6	1	0	0	0	0	3.3956	0.90496	0.81257	0.26461	0.108496	0	-0.790003	7.7	3.74326	2.7	6.9554	2.93944	6.39848	1	0	1	5
AZKOYEN SA	Switzerland	13	0	18	8	10	1	0	0	0	0	3.91415	0.836495	0.694867	-0.21367	0.150978	0.166667	-1.55102	4.4	1.57889	1.9	6.8714	2.93944	6.39848	1	0	1	5
AZKOYEN SA	Thailand	13	0	14	10	4	1	0	0	0	0	4.00637	1.44759	1.08846	0.52605	0.353899	0.666667	1.26844	1.3	2.09225	4.49	7.80776	2.93944	6.39848	1	0	1	5
AZKOYEN SA	Turquia	13	0	18	13	5	1	0	0	0	0	3.47222	1.60088	0.7561	0.52605	0.628774	0.666667	1.27716	10.6	2.66423	7.38	7.85772	2.93944	6.39848	1	0	1	5
AZKOYEN SA	Uruguay	13	0	23	7	16	1	0	0	0	0	3.99607	1.1487	0.233146	-3.86767	0.14597	0.666667	-1.29153	12.2	3.61146	6.56	6.51927	2.93944	6.39848	1	0	1	5
AZKOYEN SA	Venezuela	13	0	31	11	20	1	0	0	0	0	3.8557	1.76796	0.336214	-3.86767	0.309872	0.166667	-1.55102	11.4	2.04181	10.33	7.42451	2.93944	6.39848	1	0	1	5
AZUCARERAS REUNIDAS DE JAEN SA	Germany	14	0	56	6	50	0	1	0	0	0	3.21148	0.536164	0.562607	0.26461	0.0541978	0.666667	-1.29153	11.1	1.16865	0.96	7.91629	2.70114	4.83591	0	0	0	1
AZUCARERAS REUNIDAS DE JAEN SA	Argentina	14	0	61	3	58	0	1	0	0	0	4.00345	1.28036	0.249754	-3.86767	0.279269	0.666667	-1.55102	10.6	2.54485	9.18	7.58824	2.70114	4.83591	0	0	0	1
AZUCARERAS REUNIDAS DE JAEN SA	Australia	14	0	18	2	16	0	1	0	0	0	4.23231	0.567562	0.721527	0.26461	0.165512	0	-1.29153	5	-4.71452	2.8	7.30812	2.70114	4.83591	0	0	0	1
AZUCARERAS REUNIDAS DE JAEN SA	Austria	14	0	13	0	13	0	1	0	0	0	3.23123	0.588788	0.518591	0.26461	0.0931028	0.333333	-1.55102	5.2	2.91401	1.8	6.91557	2.70114	4.83591	0	0	0	1
AZUCARERAS REUNIDAS DE JAEN SA	Bangladesh	14	0	2	0	2	0	1	0	0	0	3.93561	2.63734	1.3076	0.26461	0.590559	0.333333	1.27716	4.3	1.15269	5.96	8.15174	2.70114	4.83591	0	0	0	1
AZUCARERAS REUNIDAS DE JAEN SA	Belgium	14	0	38	2	36	0	1	0	0	0	3.13244	0.777357	0.634216	-0.25827	0.130961	0.666667	-1.29153	8.4	6.38874	1.25	7.02031	2.70114	4.83591	0	0	0	1
AZUCARERAS REUNIDAS DE JAEN SA	Brasil	14	0	53	3	50	0	1	0	0	0	3.89327	1.91931	0.602092	-0.25827	0.406583	0.25	-1.55102	9.3	1.70724	2.94	8.27046	2.70114	4.83591	0	0	0	1
AZUCARERAS REUNIDAS DE JAEN SA	Bulgaria	14	0	13	0	13	0	1	0	0	0	3.36942	1.12444	0.190378	0.26461	0.191694	0.5	-0.790003	10.1	8.1765	6.25	6.88874	2.70114	4.83591	0	0	0	1
AZUCARERAS REUNIDAS DE JAEN SA	Canada	14	0	23	3	20	0	1	0	0	0	3.81425	0.103029	0.79255	-0.25827	0.161496	0.166667	-1.29153	6.7	3.0366	2.9	7.50919	2.70114	4.83591	0	0	0	1
AZUCARERAS REUNIDAS DE JAEN SA	Chile	14	0	49	2	47	0	1	0	0	0	4.03132	1.48778	0.490568	-3.86767	0.146208	0.416667	-1.55102	8	5.60687	5.71	7.21206	2.70114	4.83591	0	0	0	1
AZUCARERAS REUNIDAS DE JAEN SA	China	14	0	44	3	41	0	1	0	0	0	3.98191	1.90078	1.11489	0.52605	1.8939	0.333333	1.26844	4.2	3.22686	10.2	9.11544	2.70114	4.83591	0	0	0	1
AZUCARERAS REUNIDAS DE JAEN SA	Colombia	14	0	33	0	33	0	1	0	0	0	3.90663	1.54759	0.748636	-3.86767	0.629637	0.166667	-1.55102	12	8.29023	4.72	7.65269	2.70114	4.83591	0	0	0	1
AZUCARERAS REUNIDAS DE JAEN SA	South Korea	14	0	10	1	9	0	1	0	0	0	4.00439	0.420141	0.172921	0.52605	0.19628	0.541667	-0.271032	3.7	0.900652	4.2	7.68389	2.70114	4.83591	0	0	0	1
AZUCARERAS REUNIDAS DE JAEN SA	Costa Rica	14	0	15	1	14	0	1	0	0	0	3.93278	1.54875	0.662422	-3.86767	0.00206424	0	-1.55102	6.6	3.26941	5.91	6.63621	2.70114	4.83591	0	0	0	1
AZUCARERAS REUNIDAS DE JAEN SA	Croacia	14	0	8	0	8	0	1	0	0	0	3.22565	1.27885	0.253946	0.26461	1.01215	0.666667	-1.55102	12.6	4.3578	4.28	6.64771	2.70114	4.83591	0	0	0	1
AZUCARERAS REUNIDAS DE JAEN SA	Denmark	14	0	10	1	9	0	1	0	0	0	3.31418	0.590138	0.733766	0.26461	0.112828	0.166667	-1.04949	4.8	2.05207	3.05	6.73368	2.70114	4.83591	0	0	0	1
AZUCARERAS REUNIDAS DE JAEN SA	Ecuador	14	0	18	1	17	0	1	0	0	0	3.95347	1.61213	0.825643	-3.38939	0.280888	0.133333	-1.55102	7.7	5.24269	4.74	7.12151	2.70114	4.83591	0	0	0	1
AZUCARERAS REUNIDAS DE JAEN SA	El Salvador	14	0	12	1	11	0	1	0	0	0	3.94102	2.12139	0.718083	-3.86767	0.459103	0.666667	-1.55102	7.2	3.05173	2.75	6.83765	2.70114	4.83591	0	0	0	1
AZUCARERAS REUNIDAS DE JAEN SA	Slovakia	14	0	13	0	13	0	1	0	0	0	3.29809	0.931708	0.0511288	0.26461	0.296655	0.333333	-1.29153	16.2	4.02343	6.04	6.73135	2.70114	4.83591	0	0	0	1
AZUCARERAS REUNIDAS DE JAEN SA	Slovenia	14	0	6	0	6	0	1	0	0	0	3.20355	0.40353	0.182051	0.26461	0.101477	0.333333	-1.29153	6.5	1.4438	4.03	6.30114	2.70114	4.83591	0	0	0	1
AZUCARERAS REUNIDAS DE JAEN SA	USA	14	0	74	11	63	0	1	0	0	0	3.87141	0.553655	1.26073	-0.69195	0.15745	0.166667	-1.29153	5.1	0.800894	3.2	8.47189	2.70114	4.83591	0	0	0	1
AZUCARERAS REUNIDAS DE JAEN SA	Estonia	14	0	3	0	3	0	1	0	0	0	3.46571	0.927963	0.110104	0.26461	0.20986	0.666667	-0.530518	7.9	20.7518	10.47	6.12908	2.70114	4.83591	0	0	0	1
AZUCARERAS REUNIDAS DE JAEN SA	Ethiopia	14	0	2	0	2	0	1	0	0	0	3.72911	2.78128	1.3431	0.26461	1.26883	0.333333	-0.530518	5.4	1.80247	10.2	7.85282	2.70114	4.83591	0	0	0	1
AZUCARERAS REUNIDAS DE JAEN SA	Philippine	14	0	12	0	12	0	1	0	0	0	4.07154	1.53391	0.995918	0.26461	0.359399	0.208333	-1.55102	7.7	1.1508	4.97	7.91936	2.70114	4.83591	0	0	0	1
AZUCARERAS REUNIDAS DE JAEN SA	Finland	14	0	9	1	8	0	1	0	0	0	3.48105	0.507403	0.679478	0.52605	0.114138	0.0833333	-1.04949	8.4	2.36125	2.09	6.71984	2.70114	4.83591	0	0	0	1
AZUCARERAS REUNIDAS DE JAEN SA	France	14	0	80	8	72	0	1	0	0	0	2.98175	0.490732	0.583416	-0.25827	0.0417816	0.333333	-1.29153	8.9	2.98952	1.19	7.78442	2.70114	4.83591	0	0	0	1
AZUCARERAS REUNIDAS DE JAEN SA	Greece	14	0	20	2	18	0	1	0	0	0	3.35976	0.538884	0.215795	0.26461	0.101199	0.166667	-1.04949	9.8	0.269531	3.66	7.04548	2.70114	4.83591	0	0	0	1
AZUCARERAS REUNIDAS DE JAEN SA	The Netherlands	14	0	23	2	21	0	1	0	0	0	3.17633	0.566689	0.663452	0.26461	0.0980731	0	-1.29153	4.7	6.98972	1.13	7.21272	2.70114	4.83591	0	0	0	1
AZUCARERAS REUNIDAS DE JAEN SA	Hungary	14	0	20	1	19	0	1	0	0	0	3.29217	1.2511	0.147629	0.52605	0.00651064	0	-1.29153	7.2	6.0699	4.25	7.00376	2.70114	4.83591	0	0	0	1
AZUCARERAS REUNIDAS DE JAEN SA	India	14	0	18	0	18	0	1	0	0	0	3.88339	2.24326	1.22135	0.26461	0.405146	0.333333	1.26844	4.4	0.818883	9.23	9.03925	2.70114	4.83591	0	0	0	1
AZUCARERAS REUNIDAS DE JAEN SA	Ireland	14	0	19	2	17	0	1	0	0	0	3.18256	0.764228	0.019023	0.26461	0.0741923	0.666667	-1.55102	4.3	-11.284	5.5	6.619	2.70114	4.83591	0	0	0	1
AZUCARERAS REUNIDAS DE JAEN SA	Iceland	14	0	2	0	2	0	1	0	0	0	3.47432	0.957051	0.692716	0.26461	0.110148	0.666667	-1.04949	2.6	14.7276	5.53	5.47239	2.70114	4.83591	0	0	0	1
AZUCARERAS REUNIDAS DE JAEN SA	Israel	14	0	9	1	8	0	1	0	0	0	3.54353	1.46344	0.103381	-0.21367	0.110461	0	1.01767	9	4.52632	5.17	6.84033	2.70114	4.83591	0	0	0	1
AZUCARERAS REUNIDAS DE JAEN SA	Italy	14	0	65	4	61	0	1	0	0	0	3.12249	0.419623	0.297329	-0.25827	0.00573603	0.25	-1.29153	7.7	1.13309	-3.56	7.76795	2.70114	4.83591	0	0	0	1
AZUCARERAS REUNIDAS DE JAEN SA	Japan	14	0	15	2	13	0	1	0	0	0	4.02876	0.661939	0.887715	0.52605	0.0207448	0.416667	1.26844	4.4	0.0612047	2.6	8.10644	2.70114	4.83591	0	0	0	1
AZUCARERAS REUNIDAS DE JAEN SA	Latvia	14	0	3	0	3	0	1	0	0	0	3.43418	0.923385	0.149979	0.26461	0.312954	0.416667	-1.03204	8.9	3.9397	10.6	6.36182	2.70114	4.83591	0	0	0	1
AZUCARERAS REUNIDAS DE JAEN SA	Lithuania	14	0	2	0	2	0	1	0	0	0	3.41598	0.941538	0.270507	0.26461	0.206518	0.25	-1.29153	8.3	3.93337	7.56	6.5333	2.70114	4.83591	0	0	0	1
AZUCARERAS REUNIDAS DE JAEN SA	Luxembourg	14	0	8	0	8	0	1	0	0	0	3.11354	1.69208	0.929135	-0.25827	0.11085	0.166667	-1.55102	4.5	10.1045	4.03	5.65964	2.70114	4.83591	0	0	0	1
AZUCARERAS REUNIDAS DE JAEN SA	Malta	14	0	3	0	3	0	1	0	0	0	3.20679	1.13972	0.366184	0.52605	0.130339	0.333333	-1.55102	7.3	10.5646	2.49	5.60584	2.70114	4.83591	0	0	0	1
AZUCARERAS REUNIDAS DE JAEN SA	Morocco	14	0	40	2	38	0	1	0	0	0	2.94765	2.40856	0.965929	0.52605	1.13327	0.166667	1.27716	11	5.6818	1.72	7.47918	2.70114	4.83591	0	0	0	1
AZUCARERAS REUNIDAS DE JAEN SA	Mexico	14	0	68	6	62	0	1	0	0	0	3.96116	1.61593	0.61242	-3.86767	0.803904	0.333333	-1.55102	3.5	2.35186	2.8	8.01321	2.70114	4.83591	0	0	0	1
AZUCARERAS REUNIDAS DE JAEN SA	Nigeria	14	0	2	0	2	0	1	0	0	0	3.5664	2.38172	1.08093	0.26461	1.74765	0.666667	-0.530518	5.6	3.50758	6.1	8.15031	2.70114	4.83591	0	0	0	1
AZUCARERAS REUNIDAS DE JAEN SA	Norway	14	0	10	0	10	0	1	0	0	0	3.39007	0.558513	0.773884	0.26461	0.110833	0.166667	-1.04949	4.6	1.15494	2.26	6.66495	2.70114	4.83591	0	0	0	1
AZUCARERAS REUNIDAS DE JAEN SA	New Zealand	14	0	2	0	2	0	1	0	0	0	4.2904	0.485975	0.553697	0.26461	0.0975475	0.666667	-0.790003	3.8	1.46672	1.9	6.61267	2.70114	4.83591	0	0	0	1
AZUCARERAS REUNIDAS DE JAEN SA	Panama	14	0	24	0	24	0	1	0	0	0	3.91924	1.43673	0.720964	-3.38939	0.445543	0.666667	-1.29153	9.8	4.37245	6.91	6.5094	2.70114	4.83591	0	0	0	1
AZUCARERAS REUNIDAS DE JAEN SA	Peru	14	0	33	2	31	0	1	0	0	0	3.97657	1.42631	0.798443	-3.38939	0.983327	0.666667	-1.55102	5.2	3.2493	6.45	7.44667	2.70114	4.83591	0	0	0	1
AZUCARERAS REUNIDAS DE JAEN SA	Poland	14	0	53	6	47	0	1	0	0	0	3.33558	1.19959	0.38872	0.26461	0.0799061	0.25	-1.29153	17.7	2.54782	3.55	7.58167	2.70114	4.83591	0	0	0	1
AZUCARERAS REUNIDAS DE JAEN SA	Portugal	14	1	102	9	93	0	1	0	0	0	2.8324	0.769779	0.315828	-0.25827	0.0980653	0.166667	-1.29153	7.6	1.69826	0.37	7.02323	2.70114	4.83591	0	0	0	1
AZUCARERAS REUNIDAS DE JAEN SA	UK	14	0	68	7	61	0	1	0	0	0	3.15698	0.805554	0.679132	0.26461	0.00306242	0.5	-0.790003	4.7	7.47323	1.82	7.77979	2.70114	4.83591	0	0	0	1
AZUCARERAS REUNIDAS DE JAEN SA	Czech Republic	14	0	28	3	25	0	1	0	0	0	3.26204	0.685613	0.00167352	0.26461	0.00949857	0.666667	-1.03204	7.9	8.86508	6.08	7.01005	2.70114	4.83591	0	0	0	1
AZUCARERAS REUNIDAS DE JAEN SA	Romania	14	0	20	1	19	0	1	0	0	0	3.37913	1.01845	0.52496	-0.25827	0.348609	0.5	-0.790003	7.2	6.46266	4.1	7.33514	2.70114	4.83591	0	0	0	1
AZUCARERAS REUNIDAS DE JAEN SA	Rusia	14	0	24	3	21	0	1	0	0	0	3.62123	0.696054	0.111071	0.26461	0.792843	0.666667	-0.790003	7.1	1.90974	6.4	8.15568	2.70114	4.83591	0	0	0	1
AZUCARERAS REUNIDAS DE JAEN SA	Serbia	14	0	7	1	6	0	1	0	0	0	3.30011	1.33787	0.652569	0.26461	1.71416	0.333333	-0.790003	20.8	5.64939	4.68	6.90656	2.70114	4.83591	0	0	0	1
AZUCARERAS REUNIDAS DE JAEN SA	Singapur	14	0	13	0	13	0	1	0	0	0	4.05448	1.4349	0.479333	0.26461	1.00484	0.666667	1.00895	4.1	17.2101	6.62	6.63767	2.70114	4.83591	0	0	0	1
AZUCARERAS REUNIDAS DE JAEN SA	South Africa	14	0	14	2	12	0	1	0	0	0	3.91822	1.72008	0.6954	0.26461	0.167296	0	-0.790003	23.8	2.63118	5.1	7.67106	2.70114	4.83591	0	0	0	1
AZUCARERAS REUNIDAS DE JAEN SA	Sweden	14	0	15	0	15	0	1	0	0	0	3.3956	0.90496	0.81257	0.26461	0.108496	0	-0.790003	7.7	3.74326	2.7	6.9554	2.70114	4.83591	0	0	0	1
AZUCARERAS REUNIDAS DE JAEN SA	Switzerland	14	0	18	0	18	0	1	0	0	0	3.91415	0.836495	0.694867	-0.21367	0.150978	0.166667	-1.55102	4.4	1.57889	1.9	6.8714	2.70114	4.83591	0	0	0	1
AZUCARERAS REUNIDAS DE JAEN SA	Thailand	14	0	14	2	12	0	1	0	0	0	4.00637	1.44759	1.08846	0.52605	0.353899	0.666667	1.26844	1.3	2.09225	4.49	7.80776	2.70114	4.83591	0	0	0	1
AZUCARERAS REUNIDAS DE JAEN SA	Turquia	14	0	18	0	18	0	1	0	0	0	3.47222	1.60088	0.7561	0.52605	0.628774	0.666667	1.27716	10.6	2.66423	7.38	7.85772	2.70114	4.83591	0	0	0	1
AZUCARERAS REUNIDAS DE JAEN SA	Uruguay	14	0	23	2	21	0	1	0	0	0	3.99607	1.1487	0.233146	-3.86767	0.14597	0.666667	-1.29153	12.2	3.61146	6.56	6.51927	2.70114	4.83591	0	0	0	1
AZUCARERAS REUNIDAS DE JAEN SA	Venezuela	14	0	31	0	31	0	1	0	0	0	3.8557	1.76796	0.336214	-3.86767	0.309872	0.166667	-1.55102	11.4	2.04181	10.33	7.42451	2.70114	4.83591	0	0	0	1
BAMESA ACEROS S.L.	Germany	15	0	56	29	27	1	0	0	0	0	3.21148	0.536164	0.562607	0.26461	0.0541978	0.666667	-1.29153	11.1	1.16865	0.96	7.91629	2.71558	13.4193	0	0	0	4
BAMESA ACEROS S.L.	Argentina	15	0	61	22	39	1	0	0	0	0	4.00345	1.28036	0.249754	-3.86767	0.279269	0.666667	-1.55102	10.6	2.54485	9.18	7.58824	2.71558	13.4193	0	0	0	4
BAMESA ACEROS S.L.	Australia	15	0	18	12	6	1	0	0	0	0	4.23231	0.567562	0.721527	0.26461	0.165512	0	-1.29153	5	-4.71452	2.8	7.30812	2.71558	13.4193	0	0	0	4
BAMESA ACEROS S.L.	Austria	15	0	13	10	3	1	0	0	0	0	3.23123	0.588788	0.518591	0.26461	0.0931028	0.333333	-1.55102	5.2	2.91401	1.8	6.91557	2.71558	13.4193	0	0	0	4
BAMESA ACEROS S.L.	Bangladesh	15	0	2	1	1	1	0	0	0	0	3.93561	2.63734	1.3076	0.26461	0.590559	0.333333	1.27716	4.3	1.15269	5.96	8.15174	2.71558	13.4193	0	0	0	4
BAMESA ACEROS S.L.	Belgium	15	0	38	15	23	1	0	0	0	0	3.13244	0.777357	0.634216	-0.25827	0.130961	0.666667	-1.29153	8.4	6.38874	1.25	7.02031	2.71558	13.4193	0	0	0	4
BAMESA ACEROS S.L.	Brasil	15	0	53	24	29	1	0	0	0	0	3.89327	1.91931	0.602092	-0.25827	0.406583	0.25	-1.55102	9.3	1.70724	2.94	8.27046	2.71558	13.4193	0	0	0	4
BAMESA ACEROS S.L.	Bulgaria	15	0	13	5	8	1	0	0	0	0	3.36942	1.12444	0.190378	0.26461	0.191694	0.5	-0.790003	10.1	8.1765	6.25	6.88874	2.71558	13.4193	0	0	0	4
BAMESA ACEROS S.L.	Canada	15	0	23	11	12	1	0	0	0	0	3.81425	0.103029	0.79255	-0.25827	0.161496	0.166667	-1.29153	6.7	3.0366	2.9	7.50919	2.71558	13.4193	0	0	0	4
BAMESA ACEROS S.L.	Chile	15	0	49	17	32	1	0	0	0	0	4.03132	1.48778	0.490568	-3.86767	0.146208	0.416667	-1.55102	8	5.60687	5.71	7.21206	2.71558	13.4193	0	0	0	4
BAMESA ACEROS S.L.	China	15	0	44	28	16	1	0	0	0	0	3.98191	1.90078	1.11489	0.52605	1.8939	0.333333	1.26844	4.2	3.22686	10.2	9.11544	2.71558	13.4193	0	0	0	4
BAMESA ACEROS S.L.	Colombia	15	0	33	7	26	1	0	0	0	0	3.90663	1.54759	0.748636	-3.86767	0.629637	0.166667	-1.55102	12	8.29023	4.72	7.65269	2.71558	13.4193	0	0	0	4
BAMESA ACEROS S.L.	South Korea	15	0	10	9	1	1	0	0	0	0	4.00439	0.420141	0.172921	0.52605	0.19628	0.541667	-0.271032	3.7	0.900652	4.2	7.68389	2.71558	13.4193	0	0	0	4
BAMESA ACEROS S.L.	Costa Rica	15	0	15	4	11	1	0	0	0	0	3.93278	1.54875	0.662422	-3.86767	0.00206424	0	-1.55102	6.6	3.26941	5.91	6.63621	2.71558	13.4193	0	0	0	4
BAMESA ACEROS S.L.	Croacia	15	0	8	5	3	1	0	0	0	0	3.22565	1.27885	0.253946	0.26461	1.01215	0.666667	-1.55102	12.6	4.3578	4.28	6.64771	2.71558	13.4193	0	0	0	4
BAMESA ACEROS S.L.	Denmark	15	0	10	6	4	1	0	0	0	0	3.31418	0.590138	0.733766	0.26461	0.112828	0.166667	-1.04949	4.8	2.05207	3.05	6.73368	2.71558	13.4193	0	0	0	4
BAMESA ACEROS S.L.	Ecuador	15	0	18	4	14	1	0	0	0	0	3.95347	1.61213	0.825643	-3.38939	0.280888	0.133333	-1.55102	7.7	5.24269	4.74	7.12151	2.71558	13.4193	0	0	0	4
BAMESA ACEROS S.L.	El Salvador	15	0	12	4	8	1	0	0	0	0	3.94102	2.12139	0.718083	-3.86767	0.459103	0.666667	-1.55102	7.2	3.05173	2.75	6.83765	2.71558	13.4193	0	0	0	4
BAMESA ACEROS S.L.	Slovakia	15	0	13	9	4	1	0	0	0	0	3.29809	0.931708	0.0511288	0.26461	0.296655	0.333333	-1.29153	16.2	4.02343	6.04	6.73135	2.71558	13.4193	0	0	0	4
BAMESA ACEROS S.L.	Slovenia	15	0	6	5	1	1	0	0	0	0	3.20355	0.40353	0.182051	0.26461	0.101477	0.333333	-1.29153	6.5	1.4438	4.03	6.30114	2.71558	13.4193	0	0	0	4
BAMESA ACEROS S.L.	USA	15	0	74	32	42	1	0	0	0	0	3.87141	0.553655	1.26073	-0.69195	0.15745	0.166667	-1.29153	5.1	0.800894	3.2	8.47189	2.71558	13.4193	0	0	0	4
BAMESA ACEROS S.L.	Estonia	15	0	3	2	1	1	0	0	0	0	3.46571	0.927963	0.110104	0.26461	0.20986	0.666667	-0.530518	7.9	20.7518	10.47	6.12908	2.71558	13.4193	0	0	0	4
BAMESA ACEROS S.L.	Ethiopia	15	0	2	0	2	1	0	0	0	0	3.72911	2.78128	1.3431	0.26461	1.26883	0.333333	-0.530518	5.4	1.80247	10.2	7.85282	2.71558	13.4193	0	0	0	4
BAMESA ACEROS S.L.	Philippine	15	0	12	8	4	1	0	0	0	0	4.07154	1.53391	0.995918	0.26461	0.359399	0.208333	-1.55102	7.7	1.1508	4.97	7.91936	2.71558	13.4193	0	0	0	4
BAMESA ACEROS S.L.	Finland	15	0	9	5	4	1	0	0	0	0	3.48105	0.507403	0.679478	0.52605	0.114138	0.0833333	-1.04949	8.4	2.36125	2.09	6.71984	2.71558	13.4193	0	0	0	4
BAMESA ACEROS S.L.	France	15	1	80	38	42	1	0	0	0	0	2.98175	0.490732	0.583416	-0.25827	0.0417816	0.333333	-1.29153	8.9	2.98952	1.19	7.78442	2.71558	13.4193	0	0	0	4
BAMESA ACEROS S.L.	Greece	15	0	20	11	9	1	0	0	0	0	3.35976	0.538884	0.215795	0.26461	0.101199	0.166667	-1.04949	9.8	0.269531	3.66	7.04548	2.71558	13.4193	0	0	0	4
BAMESA ACEROS S.L.	The Netherlands	15	0	23	15	8	1	0	0	0	0	3.17633	0.566689	0.663452	0.26461	0.0980731	0	-1.29153	4.7	6.98972	1.13	7.21272	2.71558	13.4193	0	0	0	4
BAMESA ACEROS S.L.	Hungary	15	0	20	12	8	1	0	0	0	0	3.29217	1.2511	0.147629	0.52605	0.00651064	0	-1.29153	7.2	6.0699	4.25	7.00376	2.71558	13.4193	0	0	0	4
BAMESA ACEROS S.L.	India	15	0	18	11	7	1	0	0	0	0	3.88339	2.24326	1.22135	0.26461	0.405146	0.333333	1.26844	4.4	0.818883	9.23	9.03925	2.71558	13.4193	0	0	0	4
BAMESA ACEROS S.L.	Ireland	15	0	19	7	12	1	0	0	0	0	3.18256	0.764228	0.019023	0.26461	0.0741923	0.666667	-1.55102	4.3	-11.284	5.5	6.619	2.71558	13.4193	0	0	0	4
BAMESA ACEROS S.L.	Iceland	15	0	2	2	0	1	0	0	0	0	3.47432	0.957051	0.692716	0.26461	0.110148	0.666667	-1.04949	2.6	14.7276	5.53	5.47239	2.71558	13.4193	0	0	0	4
BAMESA ACEROS S.L.	Israel	15	0	9	4	5	1	0	0	0	0	3.54353	1.46344	0.103381	-0.21367	0.110461	0	1.01767	9	4.52632	5.17	6.84033	2.71558	13.4193	0	0	0	4
BAMESA ACEROS S.L.	Italy	15	0	65	33	32	1	0	0	0	0	3.12249	0.419623	0.297329	-0.25827	0.00573603	0.25	-1.29153	7.7	1.13309	-3.56	7.76795	2.71558	13.4193	0	0	0	4
BAMESA ACEROS S.L.	Japan	15	0	15	10	5	1	0	0	0	0	4.02876	0.661939	0.887715	0.52605	0.0207448	0.416667	1.26844	4.4	0.0612047	2.6	8.10644	2.71558	13.4193	0	0	0	4
BAMESA ACEROS S.L.	Latvia	15	0	3	2	1	1	0	0	0	0	3.43418	0.923385	0.149979	0.26461	0.312954	0.416667	-1.03204	8.9	3.9397	10.6	6.36182	2.71558	13.4193	0	0	0	4
BAMESA ACEROS S.L.	Lithuania	15	0	2	2	0	1	0	0	0	0	3.41598	0.941538	0.270507	0.26461	0.206518	0.25	-1.29153	8.3	3.93337	7.56	6.5333	2.71558	13.4193	0	0	0	4
BAMESA ACEROS S.L.	Luxembourg	15	0	8	6	2	1	0	0	0	0	3.11354	1.69208	0.929135	-0.25827	0.11085	0.166667	-1.55102	4.5	10.1045	4.03	5.65964	2.71558	13.4193	0	0	0	4
BAMESA ACEROS S.L.	Malta	15	0	3	2	1	1	0	0	0	0	3.20679	1.13972	0.366184	0.52605	0.130339	0.333333	-1.55102	7.3	10.5646	2.49	5.60584	2.71558	13.4193	0	0	0	4
BAMESA ACEROS S.L.	Morocco	15	0	40	20	20	1	0	0	0	0	2.94765	2.40856	0.965929	0.52605	1.13327	0.166667	1.27716	11	5.6818	1.72	7.47918	2.71558	13.4193	0	0	0	4
BAMESA ACEROS S.L.	Mexico	15	0	68	26	42	1	0	0	0	0	3.96116	1.61593	0.61242	-3.86767	0.803904	0.333333	-1.55102	3.5	2.35186	2.8	8.01321	2.71558	13.4193	0	0	0	4
BAMESA ACEROS S.L.	Nigeria	15	0	2	1	1	1	0	0	0	0	3.5664	2.38172	1.08093	0.26461	1.74765	0.666667	-0.530518	5.6	3.50758	6.1	8.15031	2.71558	13.4193	0	0	0	4
BAMESA ACEROS S.L.	Norway	15	0	10	8	2	1	0	0	0	0	3.39007	0.558513	0.773884	0.26461	0.110833	0.166667	-1.04949	4.6	1.15494	2.26	6.66495	2.71558	13.4193	0	0	0	4
BAMESA ACEROS S.L.	New Zealand	15	0	2	2	0	1	0	0	0	0	4.2904	0.485975	0.553697	0.26461	0.0975475	0.666667	-0.790003	3.8	1.46672	1.9	6.61267	2.71558	13.4193	0	0	0	4
BAMESA ACEROS S.L.	Panama	15	0	24	7	17	1	0	0	0	0	3.91924	1.43673	0.720964	-3.38939	0.445543	0.666667	-1.29153	9.8	4.37245	6.91	6.5094	2.71558	13.4193	0	0	0	4
BAMESA ACEROS S.L.	Peru	15	0	33	8	25	1	0	0	0	0	3.97657	1.42631	0.798443	-3.38939	0.983327	0.666667	-1.55102	5.2	3.2493	6.45	7.44667	2.71558	13.4193	0	0	0	4
BAMESA ACEROS S.L.	Poland	15	0	53	27	26	1	0	0	0	0	3.33558	1.19959	0.38872	0.26461	0.0799061	0.25	-1.29153	17.7	2.54782	3.55	7.58167	2.71558	13.4193	0	0	0	4
BAMESA ACEROS S.L.	Portugal	15	1	102	38	64	1	0	0	0	0	2.8324	0.769779	0.315828	-0.25827	0.0980653	0.166667	-1.29153	7.6	1.69826	0.37	7.02323	2.71558	13.4193	0	0	0	4
BAMESA ACEROS S.L.	UK	15	0	68	27	41	1	0	0	0	0	3.15698	0.805554	0.679132	0.26461	0.00306242	0.5	-0.790003	4.7	7.47323	1.82	7.77979	2.71558	13.4193	0	0	0	4
BAMESA ACEROS S.L.	Czech Republic	15	0	28	18	10	1	0	0	0	0	3.26204	0.685613	0.00167352	0.26461	0.00949857	0.666667	-1.03204	7.9	8.86508	6.08	7.01005	2.71558	13.4193	0	0	0	4
BAMESA ACEROS S.L.	Romania	15	1	20	9	11	1	0	0	0	0	3.37913	1.01845	0.52496	-0.25827	0.348609	0.5	-0.790003	7.2	6.46266	4.1	7.33514	2.71558	13.4193	0	0	0	4
BAMESA ACEROS S.L.	Rusia	15	0	24	16	8	1	0	0	0	0	3.62123	0.696054	0.111071	0.26461	0.792843	0.666667	-0.790003	7.1	1.90974	6.4	8.15568	2.71558	13.4193	0	0	0	4
BAMESA ACEROS S.L.	Serbia	15	0	7	4	3	1	0	0	0	0	3.30011	1.33787	0.652569	0.26461	1.71416	0.333333	-0.790003	20.8	5.64939	4.68	6.90656	2.71558	13.4193	0	0	0	4
BAMESA ACEROS S.L.	Singapur	15	0	13	10	3	1	0	0	0	0	4.05448	1.4349	0.479333	0.26461	1.00484	0.666667	1.00895	4.1	17.2101	6.62	6.63767	2.71558	13.4193	0	0	0	4
BAMESA ACEROS S.L.	South Africa	15	0	14	6	8	1	0	0	0	0	3.91822	1.72008	0.6954	0.26461	0.167296	0	-0.790003	23.8	2.63118	5.1	7.67106	2.71558	13.4193	0	0	0	4
BAMESA ACEROS S.L.	Sweden	15	0	15	9	6	1	0	0	0	0	3.3956	0.90496	0.81257	0.26461	0.108496	0	-0.790003	7.7	3.74326	2.7	6.9554	2.71558	13.4193	0	0	0	4
BAMESA ACEROS S.L.	Switzerland	15	0	18	8	10	1	0	0	0	0	3.91415	0.836495	0.694867	-0.21367	0.150978	0.166667	-1.55102	4.4	1.57889	1.9	6.8714	2.71558	13.4193	0	0	0	4
BAMESA ACEROS S.L.	Thailand	15	0	14	10	4	1	0	0	0	0	4.00637	1.44759	1.08846	0.52605	0.353899	0.666667	1.26844	1.3	2.09225	4.49	7.80776	2.71558	13.4193	0	0	0	4
BAMESA ACEROS S.L.	Turquia	15	1	18	13	5	1	0	0	0	0	3.47222	1.60088	0.7561	0.52605	0.628774	0.666667	1.27716	10.6	2.66423	7.38	7.85772	2.71558	13.4193	0	0	0	4
BAMESA ACEROS S.L.	Uruguay	15	0	23	7	16	1	0	0	0	0	3.99607	1.1487	0.233146	-3.86767	0.14597	0.666667	-1.29153	12.2	3.61146	6.56	6.51927	2.71558	13.4193	0	0	0	4
BAMESA ACEROS S.L.	Venezuela	15	0	31	11	20	1	0	0	0	0	3.8557	1.76796	0.336214	-3.86767	0.309872	0.166667	-1.55102	11.4	2.04181	10.33	7.42451	2.71558	13.4193	0	0	0	4
Banco Bilbao Vizcaya Argentaria	Germany	16	0	56	2	54	0	0	0	0	1	3.21148	0.536164	0.562607	0.26461	0.0541978	0.666667	-1.29153	11.1	1.16865	0.96	7.91629	4.97677	25.3066	1	1	0	22
Banco Bilbao Vizcaya Argentaria	Argentina	16	1	61	4	57	0	0	0	0	1	4.00345	1.28036	0.249754	-3.86767	0.279269	0.666667	-1.55102	10.6	2.54485	9.18	7.58824	4.97677	25.3066	1	1	0	22
Banco Bilbao Vizcaya Argentaria	Australia	16	0	18	0	18	0	0	0	0	1	4.23231	0.567562	0.721527	0.26461	0.165512	0	-1.29153	5	-4.71452	2.8	7.30812	4.97677	25.3066	1	1	0	22
Banco Bilbao Vizcaya Argentaria	Austria	16	0	13	0	13	0	0	0	0	1	3.23123	0.588788	0.518591	0.26461	0.0931028	0.333333	-1.55102	5.2	2.91401	1.8	6.91557	4.97677	25.3066	1	1	0	22
Banco Bilbao Vizcaya Argentaria	Bangladesh	16	0	2	0	2	0	0	0	0	1	3.93561	2.63734	1.3076	0.26461	0.590559	0.333333	1.27716	4.3	1.15269	5.96	8.15174	4.97677	25.3066	1	1	0	22
Banco Bilbao Vizcaya Argentaria	Belgium	16	1	38	3	35	0	0	0	0	1	3.13244	0.777357	0.634216	-0.25827	0.130961	0.666667	-1.29153	8.4	6.38874	1.25	7.02031	4.97677	25.3066	1	1	0	22
Banco Bilbao Vizcaya Argentaria	Brasil	16	0	53	2	51	0	0	0	0	1	3.89327	1.91931	0.602092	-0.25827	0.406583	0.25	-1.55102	9.3	1.70724	2.94	8.27046	4.97677	25.3066	1	1	0	22
Banco Bilbao Vizcaya Argentaria	Bulgaria	16	0	13	0	13	0	0	0	0	1	3.36942	1.12444	0.190378	0.26461	0.191694	0.5	-0.790003	10.1	8.1765	6.25	6.88874	4.97677	25.3066	1	1	0	22
Banco Bilbao Vizcaya Argentaria	Canada	16	0	23	1	22	0	0	0	0	1	3.81425	0.103029	0.79255	-0.25827	0.161496	0.166667	-1.29153	6.7	3.0366	2.9	7.50919	4.97677	25.3066	1	1	0	22
Banco Bilbao Vizcaya Argentaria	Chile	16	1	49	3	46	0	0	0	0	1	4.03132	1.48778	0.490568	-3.86767	0.146208	0.416667	-1.55102	8	5.60687	5.71	7.21206	4.97677	25.3066	1	1	0	22
Banco Bilbao Vizcaya Argentaria	China	16	1	44	2	42	0	0	0	0	1	3.98191	1.90078	1.11489	0.52605	1.8939	0.333333	1.26844	4.2	3.22686	10.2	9.11544	4.97677	25.3066	1	1	0	22
Banco Bilbao Vizcaya Argentaria	Colombia	16	1	33	3	30	0	0	0	0	1	3.90663	1.54759	0.748636	-3.86767	0.629637	0.166667	-1.55102	12	8.29023	4.72	7.65269	4.97677	25.3066	1	1	0	22
Banco Bilbao Vizcaya Argentaria	South Korea	16	0	10	0	10	0	0	0	0	1	4.00439	0.420141	0.172921	0.52605	0.19628	0.541667	-0.271032	3.7	0.900652	4.2	7.68389	4.97677	25.3066	1	1	0	22
Banco Bilbao Vizcaya Argentaria	Costa Rica	16	0	15	1	14	0	0	0	0	1	3.93278	1.54875	0.662422	-3.86767	0.00206424	0	-1.55102	6.6	3.26941	5.91	6.63621	4.97677	25.3066	1	1	0	22
Banco Bilbao Vizcaya Argentaria	Croacia	16	0	8	0	8	0	0	0	0	1	3.22565	1.27885	0.253946	0.26461	1.01215	0.666667	-1.55102	12.6	4.3578	4.28	6.64771	4.97677	25.3066	1	1	0	22
Banco Bilbao Vizcaya Argentaria	Denmark	16	0	10	0	10	0	0	0	0	1	3.31418	0.590138	0.733766	0.26461	0.112828	0.166667	-1.04949	4.8	2.05207	3.05	6.73368	4.97677	25.3066	1	1	0	22
Banco Bilbao Vizcaya Argentaria	Ecuador	16	0	18	2	16	0	0	0	0	1	3.95347	1.61213	0.825643	-3.38939	0.280888	0.133333	-1.55102	7.7	5.24269	4.74	7.12151	4.97677	25.3066	1	1	0	22
Banco Bilbao Vizcaya Argentaria	El Salvador	16	0	12	1	11	0	0	0	0	1	3.94102	2.12139	0.718083	-3.86767	0.459103	0.666667	-1.55102	7.2	3.05173	2.75	6.83765	4.97677	25.3066	1	1	0	22
Banco Bilbao Vizcaya Argentaria	Slovakia	16	0	13	0	13	0	0	0	0	1	3.29809	0.931708	0.0511288	0.26461	0.296655	0.333333	-1.29153	16.2	4.02343	6.04	6.73135	4.97677	25.3066	1	1	0	22
Banco Bilbao Vizcaya Argentaria	Slovenia	16	0	6	0	6	0	0	0	0	1	3.20355	0.40353	0.182051	0.26461	0.101477	0.333333	-1.29153	6.5	1.4438	4.03	6.30114	4.97677	25.3066	1	1	0	22
Banco Bilbao Vizcaya Argentaria	USA	16	1	74	7	67	0	0	0	0	1	3.87141	0.553655	1.26073	-0.69195	0.15745	0.166667	-1.29153	5.1	0.800894	3.2	8.47189	4.97677	25.3066	1	1	0	22
Banco Bilbao Vizcaya Argentaria	Estonia	16	0	3	0	3	0	0	0	0	1	3.46571	0.927963	0.110104	0.26461	0.20986	0.666667	-0.530518	7.9	20.7518	10.47	6.12908	4.97677	25.3066	1	1	0	22
Banco Bilbao Vizcaya Argentaria	Ethiopia	16	0	2	0	2	0	0	0	0	1	3.72911	2.78128	1.3431	0.26461	1.26883	0.333333	-0.530518	5.4	1.80247	10.2	7.85282	4.97677	25.3066	1	1	0	22
Banco Bilbao Vizcaya Argentaria	Philippine	16	0	12	1	11	0	0	0	0	1	4.07154	1.53391	0.995918	0.26461	0.359399	0.208333	-1.55102	7.7	1.1508	4.97	7.91936	4.97677	25.3066	1	1	0	22
Banco Bilbao Vizcaya Argentaria	Finland	16	0	9	0	9	0	0	0	0	1	3.48105	0.507403	0.679478	0.52605	0.114138	0.0833333	-1.04949	8.4	2.36125	2.09	6.71984	4.97677	25.3066	1	1	0	22
Banco Bilbao Vizcaya Argentaria	France	16	1	80	5	75	0	0	0	0	1	2.98175	0.490732	0.583416	-0.25827	0.0417816	0.333333	-1.29153	8.9	2.98952	1.19	7.78442	4.97677	25.3066	1	1	0	22
Banco Bilbao Vizcaya Argentaria	Greece	16	0	20	1	19	0	0	0	0	1	3.35976	0.538884	0.215795	0.26461	0.101199	0.166667	-1.04949	9.8	0.269531	3.66	7.04548	4.97677	25.3066	1	1	0	22
Banco Bilbao Vizcaya Argentaria	The Netherlands	16	0	23	0	23	0	0	0	0	1	3.17633	0.566689	0.663452	0.26461	0.0980731	0	-1.29153	4.7	6.98972	1.13	7.21272	4.97677	25.3066	1	1	0	22
Banco Bilbao Vizcaya Argentaria	Hungary	16	0	20	1	19	0	0	0	0	1	3.29217	1.2511	0.147629	0.52605	0.00651064	0	-1.29153	7.2	6.0699	4.25	7.00376	4.97677	25.3066	1	1	0	22
Banco Bilbao Vizcaya Argentaria	India	16	0	18	1	17	0	0	0	0	1	3.88339	2.24326	1.22135	0.26461	0.405146	0.333333	1.26844	4.4	0.818883	9.23	9.03925	4.97677	25.3066	1	1	0	22
Banco Bilbao Vizcaya Argentaria	Ireland	16	0	19	1	18	0	0	0	0	1	3.18256	0.764228	0.019023	0.26461	0.0741923	0.666667	-1.55102	4.3	-11.284	5.5	6.619	4.97677	25.3066	1	1	0	22
Banco Bilbao Vizcaya Argentaria	Iceland	16	0	2	0	2	0	0	0	0	1	3.47432	0.957051	0.692716	0.26461	0.110148	0.666667	-1.04949	2.6	14.7276	5.53	5.47239	4.97677	25.3066	1	1	0	22
Banco Bilbao Vizcaya Argentaria	Israel	16	0	9	0	9	0	0	0	0	1	3.54353	1.46344	0.103381	-0.21367	0.110461	0	1.01767	9	4.52632	5.17	6.84033	4.97677	25.3066	1	1	0	22
Banco Bilbao Vizcaya Argentaria	Italy	16	1	65	3	62	0	0	0	0	1	3.12249	0.419623	0.297329	-0.25827	0.00573603	0.25	-1.29153	7.7	1.13309	-3.56	7.76795	4.97677	25.3066	1	1	0	22
Banco Bilbao Vizcaya Argentaria	Japan	16	1	15	2	13	0	0	0	0	1	4.02876	0.661939	0.887715	0.52605	0.0207448	0.416667	1.26844	4.4	0.0612047	2.6	8.10644	4.97677	25.3066	1	1	0	22
Banco Bilbao Vizcaya Argentaria	Latvia	16	0	3	0	3	0	0	0	0	1	3.43418	0.923385	0.149979	0.26461	0.312954	0.416667	-1.03204	8.9	3.9397	10.6	6.36182	4.97677	25.3066	1	1	0	22
Banco Bilbao Vizcaya Argentaria	Lithuania	16	0	2	0	2	0	0	0	0	1	3.41598	0.941538	0.270507	0.26461	0.206518	0.25	-1.29153	8.3	3.93337	7.56	6.5333	4.97677	25.3066	1	1	0	22
Banco Bilbao Vizcaya Argentaria	Luxembourg	16	0	8	1	7	0	0	0	0	1	3.11354	1.69208	0.929135	-0.25827	0.11085	0.166667	-1.55102	4.5	10.1045	4.03	5.65964	4.97677	25.3066	1	1	0	22
Banco Bilbao Vizcaya Argentaria	Malta	16	0	3	0	3	0	0	0	0	1	3.20679	1.13972	0.366184	0.52605	0.130339	0.333333	-1.55102	7.3	10.5646	2.49	5.60584	4.97677	25.3066	1	1	0	22
Banco Bilbao Vizcaya Argentaria	Morocco	16	0	40	1	39	0	0	0	0	1	2.94765	2.40856	0.965929	0.52605	1.13327	0.166667	1.27716	11	5.6818	1.72	7.47918	4.97677	25.3066	1	1	0	22
Banco Bilbao Vizcaya Argentaria	Mexico	16	1	68	5	63	0	0	0	0	1	3.96116	1.61593	0.61242	-3.86767	0.803904	0.333333	-1.55102	3.5	2.35186	2.8	8.01321	4.97677	25.3066	1	1	0	22
Banco Bilbao Vizcaya Argentaria	Nigeria	16	0	2	0	2	0	0	0	0	1	3.5664	2.38172	1.08093	0.26461	1.74765	0.666667	-0.530518	5.6	3.50758	6.1	8.15031	4.97677	25.3066	1	1	0	22
Banco Bilbao Vizcaya Argentaria	Norway	16	0	10	0	10	0	0	0	0	1	3.39007	0.558513	0.773884	0.26461	0.110833	0.166667	-1.04949	4.6	1.15494	2.26	6.66495	4.97677	25.3066	1	1	0	22
Banco Bilbao Vizcaya Argentaria	New Zealand	16	0	2	0	2	0	0	0	0	1	4.2904	0.485975	0.553697	0.26461	0.0975475	0.666667	-0.790003	3.8	1.46672	1.9	6.61267	4.97677	25.3066	1	1	0	22
Banco Bilbao Vizcaya Argentaria	Panama	16	1	24	3	21	0	0	0	0	1	3.91924	1.43673	0.720964	-3.38939	0.445543	0.666667	-1.29153	9.8	4.37245	6.91	6.5094	4.97677	25.3066	1	1	0	22
Banco Bilbao Vizcaya Argentaria	Peru	16	1	33	3	30	0	0	0	0	1	3.97657	1.42631	0.798443	-3.38939	0.983327	0.666667	-1.55102	5.2	3.2493	6.45	7.44667	4.97677	25.3066	1	1	0	22
Banco Bilbao Vizcaya Argentaria	Poland	16	0	53	3	50	0	0	0	0	1	3.33558	1.19959	0.38872	0.26461	0.0799061	0.25	-1.29153	17.7	2.54782	3.55	7.58167	4.97677	25.3066	1	1	0	22
Banco Bilbao Vizcaya Argentaria	Portugal	16	1	102	10	92	0	0	0	0	1	2.8324	0.769779	0.315828	-0.25827	0.0980653	0.166667	-1.29153	7.6	1.69826	0.37	7.02323	4.97677	25.3066	1	1	0	22
Banco Bilbao Vizcaya Argentaria	UK	16	1	68	4	64	0	0	0	0	1	3.15698	0.805554	0.679132	0.26461	0.00306242	0.5	-0.790003	4.7	7.47323	1.82	7.77979	4.97677	25.3066	1	1	0	22
Banco Bilbao Vizcaya Argentaria	Czech Republic	16	0	28	1	27	0	0	0	0	1	3.26204	0.685613	0.00167352	0.26461	0.00949857	0.666667	-1.03204	7.9	8.86508	6.08	7.01005	4.97677	25.3066	1	1	0	22
Banco Bilbao Vizcaya Argentaria	Romania	16	0	20	1	19	0	0	0	0	1	3.37913	1.01845	0.52496	-0.25827	0.348609	0.5	-0.790003	7.2	6.46266	4.1	7.33514	4.97677	25.3066	1	1	0	22
Banco Bilbao Vizcaya Argentaria	Rusia	16	0	24	1	23	0	0	0	0	1	3.62123	0.696054	0.111071	0.26461	0.792843	0.666667	-0.790003	7.1	1.90974	6.4	8.15568	4.97677	25.3066	1	1	0	22
Banco Bilbao Vizcaya Argentaria	Serbia	16	0	7	0	7	0	0	0	0	1	3.30011	1.33787	0.652569	0.26461	1.71416	0.333333	-0.790003	20.8	5.64939	4.68	6.90656	4.97677	25.3066	1	1	0	22
Banco Bilbao Vizcaya Argentaria	Singapur	16	1	13	1	12	0	0	0	0	1	4.05448	1.4349	0.479333	0.26461	1.00484	0.666667	1.00895	4.1	17.2101	6.62	6.63767	4.97677	25.3066	1	1	0	22
Banco Bilbao Vizcaya Argentaria	South Africa	16	0	14	0	14	0	0	0	0	1	3.91822	1.72008	0.6954	0.26461	0.167296	0	-0.790003	23.8	2.63118	5.1	7.67106	4.97677	25.3066	1	1	0	22
Banco Bilbao Vizcaya Argentaria	Sweden	16	0	15	0	15	0	0	0	0	1	3.3956	0.90496	0.81257	0.26461	0.108496	0	-0.790003	7.7	3.74326	2.7	6.9554	4.97677	25.3066	1	1	0	22
Banco Bilbao Vizcaya Argentaria	Switzerland	16	1	18	2	16	0	0	0	0	1	3.91415	0.836495	0.694867	-0.21367	0.150978	0.166667	-1.55102	4.4	1.57889	1.9	6.8714	4.97677	25.3066	1	1	0	22
Banco Bilbao Vizcaya Argentaria	Thailand	16	0	14	0	14	0	0	0	0	1	4.00637	1.44759	1.08846	0.52605	0.353899	0.666667	1.26844	1.3	2.09225	4.49	7.80776	4.97677	25.3066	1	1	0	22
Banco Bilbao Vizcaya Argentaria	Turquia	16	0	18	1	17	0	0	0	0	1	3.47222	1.60088	0.7561	0.52605	0.628774	0.666667	1.27716	10.6	2.66423	7.38	7.85772	4.97677	25.3066	1	1	0	22
Banco Bilbao Vizcaya Argentaria	Uruguay	16	1	23	3	20	0	0	0	0	1	3.99607	1.1487	0.233146	-3.86767	0.14597	0.666667	-1.29153	12.2	3.61146	6.56	6.51927	4.97677	25.3066	1	1	0	22
Banco Bilbao Vizcaya Argentaria	Venezuela	16	1	31	3	28	0	0	0	0	1	3.8557	1.76796	0.336214	-3.86767	0.309872	0.166667	-1.55102	11.4	2.04181	10.33	7.42451	4.97677	25.3066	1	1	0	22
BANCO DE SABADELL	Germany	17	0	56	2	54	0	0	0	0	1	3.21148	0.536164	0.562607	0.26461	0.0541978	0.666667	-1.29153	11.1	1.16865	0.96	7.91629	3.90996	16.2075	1	1	0	7
BANCO DE SABADELL	Argentina	17	0	61	4	57	0	0	0	0	1	4.00345	1.28036	0.249754	-3.86767	0.279269	0.666667	-1.55102	10.6	2.54485	9.18	7.58824	3.90996	16.2075	1	1	0	7
BANCO DE SABADELL	Australia	17	0	18	0	18	0	0	0	0	1	4.23231	0.567562	0.721527	0.26461	0.165512	0	-1.29153	5	-4.71452	2.8	7.30812	3.90996	16.2075	1	1	0	7
BANCO DE SABADELL	Austria	17	0	13	0	13	0	0	0	0	1	3.23123	0.588788	0.518591	0.26461	0.0931028	0.333333	-1.55102	5.2	2.91401	1.8	6.91557	3.90996	16.2075	1	1	0	7
BANCO DE SABADELL	Bangladesh	17	0	2	0	2	0	0	0	0	1	3.93561	2.63734	1.3076	0.26461	0.590559	0.333333	1.27716	4.3	1.15269	5.96	8.15174	3.90996	16.2075	1	1	0	7
BANCO DE SABADELL	Belgium	17	0	38	3	35	0	0	0	0	1	3.13244	0.777357	0.634216	-0.25827	0.130961	0.666667	-1.29153	8.4	6.38874	1.25	7.02031	3.90996	16.2075	1	1	0	7
BANCO DE SABADELL	Brasil	17	0	53	2	51	0	0	0	0	1	3.89327	1.91931	0.602092	-0.25827	0.406583	0.25	-1.55102	9.3	1.70724	2.94	8.27046	3.90996	16.2075	1	1	0	7
BANCO DE SABADELL	Bulgaria	17	0	13	0	13	0	0	0	0	1	3.36942	1.12444	0.190378	0.26461	0.191694	0.5	-0.790003	10.1	8.1765	6.25	6.88874	3.90996	16.2075	1	1	0	7
BANCO DE SABADELL	Canada	17	0	23	1	22	0	0	0	0	1	3.81425	0.103029	0.79255	-0.25827	0.161496	0.166667	-1.29153	6.7	3.0366	2.9	7.50919	3.90996	16.2075	1	1	0	7
BANCO DE SABADELL	Chile	17	0	49	3	46	0	0	0	0	1	4.03132	1.48778	0.490568	-3.86767	0.146208	0.416667	-1.55102	8	5.60687	5.71	7.21206	3.90996	16.2075	1	1	0	7
BANCO DE SABADELL	China	17	0	44	2	42	0	0	0	0	1	3.98191	1.90078	1.11489	0.52605	1.8939	0.333333	1.26844	4.2	3.22686	10.2	9.11544	3.90996	16.2075	1	1	0	7
BANCO DE SABADELL	Colombia	17	0	33	3	30	0	0	0	0	1	3.90663	1.54759	0.748636	-3.86767	0.629637	0.166667	-1.55102	12	8.29023	4.72	7.65269	3.90996	16.2075	1	1	0	7
BANCO DE SABADELL	South Korea	17	0	10	0	10	0	0	0	0	1	4.00439	0.420141	0.172921	0.52605	0.19628	0.541667	-0.271032	3.7	0.900652	4.2	7.68389	3.90996	16.2075	1	1	0	7
BANCO DE SABADELL	Costa Rica	17	0	15	1	14	0	0	0	0	1	3.93278	1.54875	0.662422	-3.86767	0.00206424	0	-1.55102	6.6	3.26941	5.91	6.63621	3.90996	16.2075	1	1	0	7
BANCO DE SABADELL	Croacia	17	0	8	0	8	0	0	0	0	1	3.22565	1.27885	0.253946	0.26461	1.01215	0.666667	-1.55102	12.6	4.3578	4.28	6.64771	3.90996	16.2075	1	1	0	7
BANCO DE SABADELL	Denmark	17	0	10	0	10	0	0	0	0	1	3.31418	0.590138	0.733766	0.26461	0.112828	0.166667	-1.04949	4.8	2.05207	3.05	6.73368	3.90996	16.2075	1	1	0	7
BANCO DE SABADELL	Ecuador	17	0	18	2	16	0	0	0	0	1	3.95347	1.61213	0.825643	-3.38939	0.280888	0.133333	-1.55102	7.7	5.24269	4.74	7.12151	3.90996	16.2075	1	1	0	7
BANCO DE SABADELL	El Salvador	17	0	12	1	11	0	0	0	0	1	3.94102	2.12139	0.718083	-3.86767	0.459103	0.666667	-1.55102	7.2	3.05173	2.75	6.83765	3.90996	16.2075	1	1	0	7
BANCO DE SABADELL	Slovakia	17	0	13	0	13	0	0	0	0	1	3.29809	0.931708	0.0511288	0.26461	0.296655	0.333333	-1.29153	16.2	4.02343	6.04	6.73135	3.90996	16.2075	1	1	0	7
BANCO DE SABADELL	Slovenia	17	0	6	0	6	0	0	0	0	1	3.20355	0.40353	0.182051	0.26461	0.101477	0.333333	-1.29153	6.5	1.4438	4.03	6.30114	3.90996	16.2075	1	1	0	7
BANCO DE SABADELL	USA	17	1	74	7	67	0	0	0	0	1	3.87141	0.553655	1.26073	-0.69195	0.15745	0.166667	-1.29153	5.1	0.800894	3.2	8.47189	3.90996	16.2075	1	1	0	7
BANCO DE SABADELL	Estonia	17	0	3	0	3	0	0	0	0	1	3.46571	0.927963	0.110104	0.26461	0.20986	0.666667	-0.530518	7.9	20.7518	10.47	6.12908	3.90996	16.2075	1	1	0	7
BANCO DE SABADELL	Ethiopia	17	0	2	0	2	0	0	0	0	1	3.72911	2.78128	1.3431	0.26461	1.26883	0.333333	-0.530518	5.4	1.80247	10.2	7.85282	3.90996	16.2075	1	1	0	7
BANCO DE SABADELL	Philippine	17	0	12	1	11	0	0	0	0	1	4.07154	1.53391	0.995918	0.26461	0.359399	0.208333	-1.55102	7.7	1.1508	4.97	7.91936	3.90996	16.2075	1	1	0	7
BANCO DE SABADELL	Finland	17	0	9	0	9	0	0	0	0	1	3.48105	0.507403	0.679478	0.52605	0.114138	0.0833333	-1.04949	8.4	2.36125	2.09	6.71984	3.90996	16.2075	1	1	0	7
BANCO DE SABADELL	France	17	1	80	5	75	0	0	0	0	1	2.98175	0.490732	0.583416	-0.25827	0.0417816	0.333333	-1.29153	8.9	2.98952	1.19	7.78442	3.90996	16.2075	1	1	0	7
BANCO DE SABADELL	Greece	17	0	20	1	19	0	0	0	0	1	3.35976	0.538884	0.215795	0.26461	0.101199	0.166667	-1.04949	9.8	0.269531	3.66	7.04548	3.90996	16.2075	1	1	0	7
BANCO DE SABADELL	The Netherlands	17	0	23	0	23	0	0	0	0	1	3.17633	0.566689	0.663452	0.26461	0.0980731	0	-1.29153	4.7	6.98972	1.13	7.21272	3.90996	16.2075	1	1	0	7
BANCO DE SABADELL	Hungary	17	0	20	1	19	0	0	0	0	1	3.29217	1.2511	0.147629	0.52605	0.00651064	0	-1.29153	7.2	6.0699	4.25	7.00376	3.90996	16.2075	1	1	0	7
BANCO DE SABADELL	India	17	0	18	1	17	0	0	0	0	1	3.88339	2.24326	1.22135	0.26461	0.405146	0.333333	1.26844	4.4	0.818883	9.23	9.03925	3.90996	16.2075	1	1	0	7
BANCO DE SABADELL	Ireland	17	0	19	1	18	0	0	0	0	1	3.18256	0.764228	0.019023	0.26461	0.0741923	0.666667	-1.55102	4.3	-11.284	5.5	6.619	3.90996	16.2075	1	1	0	7
BANCO DE SABADELL	Iceland	17	0	2	0	2	0	0	0	0	1	3.47432	0.957051	0.692716	0.26461	0.110148	0.666667	-1.04949	2.6	14.7276	5.53	5.47239	3.90996	16.2075	1	1	0	7
BANCO DE SABADELL	Israel	17	0	9	0	9	0	0	0	0	1	3.54353	1.46344	0.103381	-0.21367	0.110461	0	1.01767	9	4.52632	5.17	6.84033	3.90996	16.2075	1	1	0	7
BANCO DE SABADELL	Italy	17	0	65	3	62	0	0	0	0	1	3.12249	0.419623	0.297329	-0.25827	0.00573603	0.25	-1.29153	7.7	1.13309	-3.56	7.76795	3.90996	16.2075	1	1	0	7
BANCO DE SABADELL	Japan	17	0	15	2	13	0	0	0	0	1	4.02876	0.661939	0.887715	0.52605	0.0207448	0.416667	1.26844	4.4	0.0612047	2.6	8.10644	3.90996	16.2075	1	1	0	7
BANCO DE SABADELL	Latvia	17	0	3	0	3	0	0	0	0	1	3.43418	0.923385	0.149979	0.26461	0.312954	0.416667	-1.03204	8.9	3.9397	10.6	6.36182	3.90996	16.2075	1	1	0	7
BANCO DE SABADELL	Lithuania	17	0	2	0	2	0	0	0	0	1	3.41598	0.941538	0.270507	0.26461	0.206518	0.25	-1.29153	8.3	3.93337	7.56	6.5333	3.90996	16.2075	1	1	0	7
BANCO DE SABADELL	Luxembourg	17	0	8	1	7	0	0	0	0	1	3.11354	1.69208	0.929135	-0.25827	0.11085	0.166667	-1.55102	4.5	10.1045	4.03	5.65964	3.90996	16.2075	1	1	0	7
BANCO DE SABADELL	Malta	17	0	3	0	3	0	0	0	0	1	3.20679	1.13972	0.366184	0.52605	0.130339	0.333333	-1.55102	7.3	10.5646	2.49	5.60584	3.90996	16.2075	1	1	0	7
BANCO DE SABADELL	Morocco	17	0	40	1	39	0	0	0	0	1	2.94765	2.40856	0.965929	0.52605	1.13327	0.166667	1.27716	11	5.6818	1.72	7.47918	3.90996	16.2075	1	1	0	7
BANCO DE SABADELL	Mexico	17	1	68	5	63	0	0	0	0	1	3.96116	1.61593	0.61242	-3.86767	0.803904	0.333333	-1.55102	3.5	2.35186	2.8	8.01321	3.90996	16.2075	1	1	0	7
BANCO DE SABADELL	Nigeria	17	0	2	0	2	0	0	0	0	1	3.5664	2.38172	1.08093	0.26461	1.74765	0.666667	-0.530518	5.6	3.50758	6.1	8.15031	3.90996	16.2075	1	1	0	7
BANCO DE SABADELL	Norway	17	0	10	0	10	0	0	0	0	1	3.39007	0.558513	0.773884	0.26461	0.110833	0.166667	-1.04949	4.6	1.15494	2.26	6.66495	3.90996	16.2075	1	1	0	7
BANCO DE SABADELL	New Zealand	17	0	2	0	2	0	0	0	0	1	4.2904	0.485975	0.553697	0.26461	0.0975475	0.666667	-0.790003	3.8	1.46672	1.9	6.61267	3.90996	16.2075	1	1	0	7
BANCO DE SABADELL	Panama	17	0	24	3	21	0	0	0	0	1	3.91924	1.43673	0.720964	-3.38939	0.445543	0.666667	-1.29153	9.8	4.37245	6.91	6.5094	3.90996	16.2075	1	1	0	7
BANCO DE SABADELL	Peru	17	0	33	3	30	0	0	0	0	1	3.97657	1.42631	0.798443	-3.38939	0.983327	0.666667	-1.55102	5.2	3.2493	6.45	7.44667	3.90996	16.2075	1	1	0	7
BANCO DE SABADELL	Poland	17	0	53	3	50	0	0	0	0	1	3.33558	1.19959	0.38872	0.26461	0.0799061	0.25	-1.29153	17.7	2.54782	3.55	7.58167	3.90996	16.2075	1	1	0	7
BANCO DE SABADELL	Portugal	17	1	102	10	92	0	0	0	0	1	2.8324	0.769779	0.315828	-0.25827	0.0980653	0.166667	-1.29153	7.6	1.69826	0.37	7.02323	3.90996	16.2075	1	1	0	7
BANCO DE SABADELL	UK	17	1	68	4	64	0	0	0	0	1	3.15698	0.805554	0.679132	0.26461	0.00306242	0.5	-0.790003	4.7	7.47323	1.82	7.77979	3.90996	16.2075	1	1	0	7
BANCO DE SABADELL	Czech Republic	17	0	28	1	27	0	0	0	0	1	3.26204	0.685613	0.00167352	0.26461	0.00949857	0.666667	-1.03204	7.9	8.86508	6.08	7.01005	3.90996	16.2075	1	1	0	7
BANCO DE SABADELL	Romania	17	0	20	1	19	0	0	0	0	1	3.37913	1.01845	0.52496	-0.25827	0.348609	0.5	-0.790003	7.2	6.46266	4.1	7.33514	3.90996	16.2075	1	1	0	7
BANCO DE SABADELL	Rusia	17	0	24	1	23	0	0	0	0	1	3.62123	0.696054	0.111071	0.26461	0.792843	0.666667	-0.790003	7.1	1.90974	6.4	8.15568	3.90996	16.2075	1	1	0	7
BANCO DE SABADELL	Serbia	17	0	7	0	7	0	0	0	0	1	3.30011	1.33787	0.652569	0.26461	1.71416	0.333333	-0.790003	20.8	5.64939	4.68	6.90656	3.90996	16.2075	1	1	0	7
BANCO DE SABADELL	Singapur	17	0	13	1	12	0	0	0	0	1	4.05448	1.4349	0.479333	0.26461	1.00484	0.666667	1.00895	4.1	17.2101	6.62	6.63767	3.90996	16.2075	1	1	0	7
BANCO DE SABADELL	South Africa	17	0	14	0	14	0	0	0	0	1	3.91822	1.72008	0.6954	0.26461	0.167296	0	-0.790003	23.8	2.63118	5.1	7.67106	3.90996	16.2075	1	1	0	7
BANCO DE SABADELL	Sweden	17	0	15	0	15	0	0	0	0	1	3.3956	0.90496	0.81257	0.26461	0.108496	0	-0.790003	7.7	3.74326	2.7	6.9554	3.90996	16.2075	1	1	0	7
BANCO DE SABADELL	Switzerland	17	0	18	2	16	0	0	0	0	1	3.91415	0.836495	0.694867	-0.21367	0.150978	0.166667	-1.55102	4.4	1.57889	1.9	6.8714	3.90996	16.2075	1	1	0	7
BANCO DE SABADELL	Thailand	17	0	14	0	14	0	0	0	0	1	4.00637	1.44759	1.08846	0.52605	0.353899	0.666667	1.26844	1.3	2.09225	4.49	7.80776	3.90996	16.2075	1	1	0	7
BANCO DE SABADELL	Turquia	17	0	18	1	17	0	0	0	0	1	3.47222	1.60088	0.7561	0.52605	0.628774	0.666667	1.27716	10.6	2.66423	7.38	7.85772	3.90996	16.2075	1	1	0	7
BANCO DE SABADELL	Uruguay	17	0	23	3	20	0	0	0	0	1	3.99607	1.1487	0.233146	-3.86767	0.14597	0.666667	-1.29153	12.2	3.61146	6.56	6.51927	3.90996	16.2075	1	1	0	7
BANCO DE SABADELL	Venezuela	17	0	31	3	28	0	0	0	0	1	3.8557	1.76796	0.336214	-3.86767	0.309872	0.166667	-1.55102	11.4	2.04181	10.33	7.42451	3.90996	16.2075	1	1	0	7
BANCO PASTOR	Germany	18	0	56	2	54	0	0	0	0	1	3.21148	0.536164	0.562607	0.26461	0.0541978	0.666667	-1.29153	11.1	1.16865	0.96	7.91629	3.49274	13.9007	1	1	0	1
BANCO PASTOR	Argentina	18	0	61	4	57	0	0	0	0	1	4.00345	1.28036	0.249754	-3.86767	0.279269	0.666667	-1.55102	10.6	2.54485	9.18	7.58824	3.49274	13.9007	1	1	0	1
BANCO PASTOR	Australia	18	0	18	0	18	0	0	0	0	1	4.23231	0.567562	0.721527	0.26461	0.165512	0	-1.29153	5	-4.71452	2.8	7.30812	3.49274	13.9007	1	1	0	1
BANCO PASTOR	Austria	18	0	13	0	13	0	0	0	0	1	3.23123	0.588788	0.518591	0.26461	0.0931028	0.333333	-1.55102	5.2	2.91401	1.8	6.91557	3.49274	13.9007	1	1	0	1
BANCO PASTOR	Bangladesh	18	0	2	0	2	0	0	0	0	1	3.93561	2.63734	1.3076	0.26461	0.590559	0.333333	1.27716	4.3	1.15269	5.96	8.15174	3.49274	13.9007	1	1	0	1
BANCO PASTOR	Belgium	18	0	38	3	35	0	0	0	0	1	3.13244	0.777357	0.634216	-0.25827	0.130961	0.666667	-1.29153	8.4	6.38874	1.25	7.02031	3.49274	13.9007	1	1	0	1
BANCO PASTOR	Brasil	18	0	53	2	51	0	0	0	0	1	3.89327	1.91931	0.602092	-0.25827	0.406583	0.25	-1.55102	9.3	1.70724	2.94	8.27046	3.49274	13.9007	1	1	0	1
BANCO PASTOR	Bulgaria	18	0	13	0	13	0	0	0	0	1	3.36942	1.12444	0.190378	0.26461	0.191694	0.5	-0.790003	10.1	8.1765	6.25	6.88874	3.49274	13.9007	1	1	0	1
BANCO PASTOR	Canada	18	0	23	1	22	0	0	0	0	1	3.81425	0.103029	0.79255	-0.25827	0.161496	0.166667	-1.29153	6.7	3.0366	2.9	7.50919	3.49274	13.9007	1	1	0	1
BANCO PASTOR	Chile	18	0	49	3	46	0	0	0	0	1	4.03132	1.48778	0.490568	-3.86767	0.146208	0.416667	-1.55102	8	5.60687	5.71	7.21206	3.49274	13.9007	1	1	0	1
BANCO PASTOR	China	18	0	44	2	42	0	0	0	0	1	3.98191	1.90078	1.11489	0.52605	1.8939	0.333333	1.26844	4.2	3.22686	10.2	9.11544	3.49274	13.9007	1	1	0	1
BANCO PASTOR	Colombia	18	0	33	3	30	0	0	0	0	1	3.90663	1.54759	0.748636	-3.86767	0.629637	0.166667	-1.55102	12	8.29023	4.72	7.65269	3.49274	13.9007	1	1	0	1
BANCO PASTOR	South Korea	18	0	10	0	10	0	0	0	0	1	4.00439	0.420141	0.172921	0.52605	0.19628	0.541667	-0.271032	3.7	0.900652	4.2	7.68389	3.49274	13.9007	1	1	0	1
BANCO PASTOR	Costa Rica	18	0	15	1	14	0	0	0	0	1	3.93278	1.54875	0.662422	-3.86767	0.00206424	0	-1.55102	6.6	3.26941	5.91	6.63621	3.49274	13.9007	1	1	0	1
BANCO PASTOR	Croacia	18	0	8	0	8	0	0	0	0	1	3.22565	1.27885	0.253946	0.26461	1.01215	0.666667	-1.55102	12.6	4.3578	4.28	6.64771	3.49274	13.9007	1	1	0	1
BANCO PASTOR	Denmark	18	0	10	0	10	0	0	0	0	1	3.31418	0.590138	0.733766	0.26461	0.112828	0.166667	-1.04949	4.8	2.05207	3.05	6.73368	3.49274	13.9007	1	1	0	1
BANCO PASTOR	Ecuador	18	0	18	2	16	0	0	0	0	1	3.95347	1.61213	0.825643	-3.38939	0.280888	0.133333	-1.55102	7.7	5.24269	4.74	7.12151	3.49274	13.9007	1	1	0	1
BANCO PASTOR	El Salvador	18	0	12	1	11	0	0	0	0	1	3.94102	2.12139	0.718083	-3.86767	0.459103	0.666667	-1.55102	7.2	3.05173	2.75	6.83765	3.49274	13.9007	1	1	0	1
BANCO PASTOR	Slovakia	18	0	13	0	13	0	0	0	0	1	3.29809	0.931708	0.0511288	0.26461	0.296655	0.333333	-1.29153	16.2	4.02343	6.04	6.73135	3.49274	13.9007	1	1	0	1
BANCO PASTOR	Slovenia	18	0	6	0	6	0	0	0	0	1	3.20355	0.40353	0.182051	0.26461	0.101477	0.333333	-1.29153	6.5	1.4438	4.03	6.30114	3.49274	13.9007	1	1	0	1
BANCO PASTOR	USA	18	1	74	7	67	0	0	0	0	1	3.87141	0.553655	1.26073	-0.69195	0.15745	0.166667	-1.29153	5.1	0.800894	3.2	8.47189	3.49274	13.9007	1	1	0	1
BANCO PASTOR	Estonia	18	0	3	0	3	0	0	0	0	1	3.46571	0.927963	0.110104	0.26461	0.20986	0.666667	-0.530518	7.9	20.7518	10.47	6.12908	3.49274	13.9007	1	1	0	1
BANCO PASTOR	Ethiopia	18	0	2	0	2	0	0	0	0	1	3.72911	2.78128	1.3431	0.26461	1.26883	0.333333	-0.530518	5.4	1.80247	10.2	7.85282	3.49274	13.9007	1	1	0	1
BANCO PASTOR	Philippine	18	0	12	1	11	0	0	0	0	1	4.07154	1.53391	0.995918	0.26461	0.359399	0.208333	-1.55102	7.7	1.1508	4.97	7.91936	3.49274	13.9007	1	1	0	1
BANCO PASTOR	Finland	18	0	9	0	9	0	0	0	0	1	3.48105	0.507403	0.679478	0.52605	0.114138	0.0833333	-1.04949	8.4	2.36125	2.09	6.71984	3.49274	13.9007	1	1	0	1
BANCO PASTOR	France	18	0	80	5	75	0	0	0	0	1	2.98175	0.490732	0.583416	-0.25827	0.0417816	0.333333	-1.29153	8.9	2.98952	1.19	7.78442	3.49274	13.9007	1	1	0	1
BANCO PASTOR	Greece	18	0	20	1	19	0	0	0	0	1	3.35976	0.538884	0.215795	0.26461	0.101199	0.166667	-1.04949	9.8	0.269531	3.66	7.04548	3.49274	13.9007	1	1	0	1
BANCO PASTOR	The Netherlands	18	0	23	0	23	0	0	0	0	1	3.17633	0.566689	0.663452	0.26461	0.0980731	0	-1.29153	4.7	6.98972	1.13	7.21272	3.49274	13.9007	1	1	0	1
BANCO PASTOR	Hungary	18	0	20	1	19	0	0	0	0	1	3.29217	1.2511	0.147629	0.52605	0.00651064	0	-1.29153	7.2	6.0699	4.25	7.00376	3.49274	13.9007	1	1	0	1
BANCO PASTOR	India	18	0	18	1	17	0	0	0	0	1	3.88339	2.24326	1.22135	0.26461	0.405146	0.333333	1.26844	4.4	0.818883	9.23	9.03925	3.49274	13.9007	1	1	0	1
BANCO PASTOR	Ireland	18	0	19	1	18	0	0	0	0	1	3.18256	0.764228	0.019023	0.26461	0.0741923	0.666667	-1.55102	4.3	-11.284	5.5	6.619	3.49274	13.9007	1	1	0	1
BANCO PASTOR	Iceland	18	0	2	0	2	0	0	0	0	1	3.47432	0.957051	0.692716	0.26461	0.110148	0.666667	-1.04949	2.6	14.7276	5.53	5.47239	3.49274	13.9007	1	1	0	1
BANCO PASTOR	Israel	18	0	9	0	9	0	0	0	0	1	3.54353	1.46344	0.103381	-0.21367	0.110461	0	1.01767	9	4.52632	5.17	6.84033	3.49274	13.9007	1	1	0	1
BANCO PASTOR	Italy	18	0	65	3	62	0	0	0	0	1	3.12249	0.419623	0.297329	-0.25827	0.00573603	0.25	-1.29153	7.7	1.13309	-3.56	7.76795	3.49274	13.9007	1	1	0	1
BANCO PASTOR	Japan	18	0	15	2	13	0	0	0	0	1	4.02876	0.661939	0.887715	0.52605	0.0207448	0.416667	1.26844	4.4	0.0612047	2.6	8.10644	3.49274	13.9007	1	1	0	1
BANCO PASTOR	Latvia	18	0	3	0	3	0	0	0	0	1	3.43418	0.923385	0.149979	0.26461	0.312954	0.416667	-1.03204	8.9	3.9397	10.6	6.36182	3.49274	13.9007	1	1	0	1
BANCO PASTOR	Lithuania	18	0	2	0	2	0	0	0	0	1	3.41598	0.941538	0.270507	0.26461	0.206518	0.25	-1.29153	8.3	3.93337	7.56	6.5333	3.49274	13.9007	1	1	0	1
BANCO PASTOR	Luxembourg	18	0	8	1	7	0	0	0	0	1	3.11354	1.69208	0.929135	-0.25827	0.11085	0.166667	-1.55102	4.5	10.1045	4.03	5.65964	3.49274	13.9007	1	1	0	1
BANCO PASTOR	Malta	18	0	3	0	3	0	0	0	0	1	3.20679	1.13972	0.366184	0.52605	0.130339	0.333333	-1.55102	7.3	10.5646	2.49	5.60584	3.49274	13.9007	1	1	0	1
BANCO PASTOR	Morocco	18	0	40	1	39	0	0	0	0	1	2.94765	2.40856	0.965929	0.52605	1.13327	0.166667	1.27716	11	5.6818	1.72	7.47918	3.49274	13.9007	1	1	0	1
BANCO PASTOR	Mexico	18	0	68	5	63	0	0	0	0	1	3.96116	1.61593	0.61242	-3.86767	0.803904	0.333333	-1.55102	3.5	2.35186	2.8	8.01321	3.49274	13.9007	1	1	0	1
BANCO PASTOR	Nigeria	18	0	2	0	2	0	0	0	0	1	3.5664	2.38172	1.08093	0.26461	1.74765	0.666667	-0.530518	5.6	3.50758	6.1	8.15031	3.49274	13.9007	1	1	0	1
BANCO PASTOR	Norway	18	0	10	0	10	0	0	0	0	1	3.39007	0.558513	0.773884	0.26461	0.110833	0.166667	-1.04949	4.6	1.15494	2.26	6.66495	3.49274	13.9007	1	1	0	1
BANCO PASTOR	New Zealand	18	0	2	0	2	0	0	0	0	1	4.2904	0.485975	0.553697	0.26461	0.0975475	0.666667	-0.790003	3.8	1.46672	1.9	6.61267	3.49274	13.9007	1	1	0	1
BANCO PASTOR	Panama	18	0	24	3	21	0	0	0	0	1	3.91924	1.43673	0.720964	-3.38939	0.445543	0.666667	-1.29153	9.8	4.37245	6.91	6.5094	3.49274	13.9007	1	1	0	1
BANCO PASTOR	Peru	18	0	33	3	30	0	0	0	0	1	3.97657	1.42631	0.798443	-3.38939	0.983327	0.666667	-1.55102	5.2	3.2493	6.45	7.44667	3.49274	13.9007	1	1	0	1
BANCO PASTOR	Poland	18	0	53	3	50	0	0	0	0	1	3.33558	1.19959	0.38872	0.26461	0.0799061	0.25	-1.29153	17.7	2.54782	3.55	7.58167	3.49274	13.9007	1	1	0	1
BANCO PASTOR	Portugal	18	0	102	10	92	0	0	0	0	1	2.8324	0.769779	0.315828	-0.25827	0.0980653	0.166667	-1.29153	7.6	1.69826	0.37	7.02323	3.49274	13.9007	1	1	0	1
BANCO PASTOR	UK	18	0	68	4	64	0	0	0	0	1	3.15698	0.805554	0.679132	0.26461	0.00306242	0.5	-0.790003	4.7	7.47323	1.82	7.77979	3.49274	13.9007	1	1	0	1
BANCO PASTOR	Czech Republic	18	0	28	1	27	0	0	0	0	1	3.26204	0.685613	0.00167352	0.26461	0.00949857	0.666667	-1.03204	7.9	8.86508	6.08	7.01005	3.49274	13.9007	1	1	0	1
BANCO PASTOR	Romania	18	0	20	1	19	0	0	0	0	1	3.37913	1.01845	0.52496	-0.25827	0.348609	0.5	-0.790003	7.2	6.46266	4.1	7.33514	3.49274	13.9007	1	1	0	1
BANCO PASTOR	Rusia	18	0	24	1	23	0	0	0	0	1	3.62123	0.696054	0.111071	0.26461	0.792843	0.666667	-0.790003	7.1	1.90974	6.4	8.15568	3.49274	13.9007	1	1	0	1
BANCO PASTOR	Serbia	18	0	7	0	7	0	0	0	0	1	3.30011	1.33787	0.652569	0.26461	1.71416	0.333333	-0.790003	20.8	5.64939	4.68	6.90656	3.49274	13.9007	1	1	0	1
BANCO PASTOR	Singapur	18	0	13	1	12	0	0	0	0	1	4.05448	1.4349	0.479333	0.26461	1.00484	0.666667	1.00895	4.1	17.2101	6.62	6.63767	3.49274	13.9007	1	1	0	1
BANCO PASTOR	South Africa	18	0	14	0	14	0	0	0	0	1	3.91822	1.72008	0.6954	0.26461	0.167296	0	-0.790003	23.8	2.63118	5.1	7.67106	3.49274	13.9007	1	1	0	1
BANCO PASTOR	Sweden	18	0	15	0	15	0	0	0	0	1	3.3956	0.90496	0.81257	0.26461	0.108496	0	-0.790003	7.7	3.74326	2.7	6.9554	3.49274	13.9007	1	1	0	1
BANCO PASTOR	Switzerland	18	0	18	2	16	0	0	0	0	1	3.91415	0.836495	0.694867	-0.21367	0.150978	0.166667	-1.55102	4.4	1.57889	1.9	6.8714	3.49274	13.9007	1	1	0	1
BANCO PASTOR	Thailand	18	0	14	0	14	0	0	0	0	1	4.00637	1.44759	1.08846	0.52605	0.353899	0.666667	1.26844	1.3	2.09225	4.49	7.80776	3.49274	13.9007	1	1	0	1
BANCO PASTOR	Turquia	18	0	18	1	17	0	0	0	0	1	3.47222	1.60088	0.7561	0.52605	0.628774	0.666667	1.27716	10.6	2.66423	7.38	7.85772	3.49274	13.9007	1	1	0	1
BANCO PASTOR	Uruguay	18	0	23	3	20	0	0	0	0	1	3.99607	1.1487	0.233146	-3.86767	0.14597	0.666667	-1.29153	12.2	3.61146	6.56	6.51927	3.49274	13.9007	1	1	0	1
BANCO PASTOR	Venezuela	18	0	31	3	28	0	0	0	0	1	3.8557	1.76796	0.336214	-3.86767	0.309872	0.166667	-1.55102	11.4	2.04181	10.33	7.42451	3.49274	13.9007	1	1	0	1
BANCO POPULAR	Germany	19	0	56	2	54	0	0	0	0	1	3.21148	0.536164	0.562607	0.26461	0.0541978	0.666667	-1.29153	11.1	1.16865	0.96	7.91629	4.10932	27.3437	1	1	0	2
BANCO POPULAR	Argentina	19	0	61	4	57	0	0	0	0	1	4.00345	1.28036	0.249754	-3.86767	0.279269	0.666667	-1.55102	10.6	2.54485	9.18	7.58824	4.10932	27.3437	1	1	0	2
BANCO POPULAR	Australia	19	0	18	0	18	0	0	0	0	1	4.23231	0.567562	0.721527	0.26461	0.165512	0	-1.29153	5	-4.71452	2.8	7.30812	4.10932	27.3437	1	1	0	2
BANCO POPULAR	Austria	19	0	13	0	13	0	0	0	0	1	3.23123	0.588788	0.518591	0.26461	0.0931028	0.333333	-1.55102	5.2	2.91401	1.8	6.91557	4.10932	27.3437	1	1	0	2
BANCO POPULAR	Bangladesh	19	0	2	0	2	0	0	0	0	1	3.93561	2.63734	1.3076	0.26461	0.590559	0.333333	1.27716	4.3	1.15269	5.96	8.15174	4.10932	27.3437	1	1	0	2
BANCO POPULAR	Belgium	19	0	38	3	35	0	0	0	0	1	3.13244	0.777357	0.634216	-0.25827	0.130961	0.666667	-1.29153	8.4	6.38874	1.25	7.02031	4.10932	27.3437	1	1	0	2
BANCO POPULAR	Brasil	19	0	53	2	51	0	0	0	0	1	3.89327	1.91931	0.602092	-0.25827	0.406583	0.25	-1.55102	9.3	1.70724	2.94	8.27046	4.10932	27.3437	1	1	0	2
BANCO POPULAR	Bulgaria	19	0	13	0	13	0	0	0	0	1	3.36942	1.12444	0.190378	0.26461	0.191694	0.5	-0.790003	10.1	8.1765	6.25	6.88874	4.10932	27.3437	1	1	0	2
BANCO POPULAR	Canada	19	0	23	1	22	0	0	0	0	1	3.81425	0.103029	0.79255	-0.25827	0.161496	0.166667	-1.29153	6.7	3.0366	2.9	7.50919	4.10932	27.3437	1	1	0	2
BANCO POPULAR	Chile	19	0	49	3	46	0	0	0	0	1	4.03132	1.48778	0.490568	-3.86767	0.146208	0.416667	-1.55102	8	5.60687	5.71	7.21206	4.10932	27.3437	1	1	0	2
BANCO POPULAR	China	19	0	44	2	42	0	0	0	0	1	3.98191	1.90078	1.11489	0.52605	1.8939	0.333333	1.26844	4.2	3.22686	10.2	9.11544	4.10932	27.3437	1	1	0	2
BANCO POPULAR	Colombia	19	0	33	3	30	0	0	0	0	1	3.90663	1.54759	0.748636	-3.86767	0.629637	0.166667	-1.55102	12	8.29023	4.72	7.65269	4.10932	27.3437	1	1	0	2
BANCO POPULAR	South Korea	19	0	10	0	10	0	0	0	0	1	4.00439	0.420141	0.172921	0.52605	0.19628	0.541667	-0.271032	3.7	0.900652	4.2	7.68389	4.10932	27.3437	1	1	0	2
BANCO POPULAR	Costa Rica	19	0	15	1	14	0	0	0	0	1	3.93278	1.54875	0.662422	-3.86767	0.00206424	0	-1.55102	6.6	3.26941	5.91	6.63621	4.10932	27.3437	1	1	0	2
BANCO POPULAR	Croacia	19	0	8	0	8	0	0	0	0	1	3.22565	1.27885	0.253946	0.26461	1.01215	0.666667	-1.55102	12.6	4.3578	4.28	6.64771	4.10932	27.3437	1	1	0	2
BANCO POPULAR	Denmark	19	0	10	0	10	0	0	0	0	1	3.31418	0.590138	0.733766	0.26461	0.112828	0.166667	-1.04949	4.8	2.05207	3.05	6.73368	4.10932	27.3437	1	1	0	2
BANCO POPULAR	Ecuador	19	0	18	2	16	0	0	0	0	1	3.95347	1.61213	0.825643	-3.38939	0.280888	0.133333	-1.55102	7.7	5.24269	4.74	7.12151	4.10932	27.3437	1	1	0	2
BANCO POPULAR	El Salvador	19	0	12	1	11	0	0	0	0	1	3.94102	2.12139	0.718083	-3.86767	0.459103	0.666667	-1.55102	7.2	3.05173	2.75	6.83765	4.10932	27.3437	1	1	0	2
BANCO POPULAR	Slovakia	19	0	13	0	13	0	0	0	0	1	3.29809	0.931708	0.0511288	0.26461	0.296655	0.333333	-1.29153	16.2	4.02343	6.04	6.73135	4.10932	27.3437	1	1	0	2
BANCO POPULAR	Slovenia	19	0	6	0	6	0	0	0	0	1	3.20355	0.40353	0.182051	0.26461	0.101477	0.333333	-1.29153	6.5	1.4438	4.03	6.30114	4.10932	27.3437	1	1	0	2
BANCO POPULAR	USA	19	0	74	7	67	0	0	0	0	1	3.87141	0.553655	1.26073	-0.69195	0.15745	0.166667	-1.29153	5.1	0.800894	3.2	8.47189	4.10932	27.3437	1	1	0	2
BANCO POPULAR	Estonia	19	0	3	0	3	0	0	0	0	1	3.46571	0.927963	0.110104	0.26461	0.20986	0.666667	-0.530518	7.9	20.7518	10.47	6.12908	4.10932	27.3437	1	1	0	2
BANCO POPULAR	Ethiopia	19	0	2	0	2	0	0	0	0	1	3.72911	2.78128	1.3431	0.26461	1.26883	0.333333	-0.530518	5.4	1.80247	10.2	7.85282	4.10932	27.3437	1	1	0	2
BANCO POPULAR	Philippine	19	0	12	1	11	0	0	0	0	1	4.07154	1.53391	0.995918	0.26461	0.359399	0.208333	-1.55102	7.7	1.1508	4.97	7.91936	4.10932	27.3437	1	1	0	2
BANCO POPULAR	Finland	19	0	9	0	9	0	0	0	0	1	3.48105	0.507403	0.679478	0.52605	0.114138	0.0833333	-1.04949	8.4	2.36125	2.09	6.71984	4.10932	27.3437	1	1	0	2
BANCO POPULAR	France	19	1	80	5	75	0	0	0	0	1	2.98175	0.490732	0.583416	-0.25827	0.0417816	0.333333	-1.29153	8.9	2.98952	1.19	7.78442	4.10932	27.3437	1	1	0	2
BANCO POPULAR	Greece	19	0	20	1	19	0	0	0	0	1	3.35976	0.538884	0.215795	0.26461	0.101199	0.166667	-1.04949	9.8	0.269531	3.66	7.04548	4.10932	27.3437	1	1	0	2
BANCO POPULAR	The Netherlands	19	0	23	0	23	0	0	0	0	1	3.17633	0.566689	0.663452	0.26461	0.0980731	0	-1.29153	4.7	6.98972	1.13	7.21272	4.10932	27.3437	1	1	0	2
BANCO POPULAR	Hungary	19	0	20	1	19	0	0	0	0	1	3.29217	1.2511	0.147629	0.52605	0.00651064	0	-1.29153	7.2	6.0699	4.25	7.00376	4.10932	27.3437	1	1	0	2
BANCO POPULAR	India	19	0	18	1	17	0	0	0	0	1	3.88339	2.24326	1.22135	0.26461	0.405146	0.333333	1.26844	4.4	0.818883	9.23	9.03925	4.10932	27.3437	1	1	0	2
BANCO POPULAR	Ireland	19	0	19	1	18	0	0	0	0	1	3.18256	0.764228	0.019023	0.26461	0.0741923	0.666667	-1.55102	4.3	-11.284	5.5	6.619	4.10932	27.3437	1	1	0	2
BANCO POPULAR	Iceland	19	0	2	0	2	0	0	0	0	1	3.47432	0.957051	0.692716	0.26461	0.110148	0.666667	-1.04949	2.6	14.7276	5.53	5.47239	4.10932	27.3437	1	1	0	2
BANCO POPULAR	Israel	19	0	9	0	9	0	0	0	0	1	3.54353	1.46344	0.103381	-0.21367	0.110461	0	1.01767	9	4.52632	5.17	6.84033	4.10932	27.3437	1	1	0	2
BANCO POPULAR	Italy	19	0	65	3	62	0	0	0	0	1	3.12249	0.419623	0.297329	-0.25827	0.00573603	0.25	-1.29153	7.7	1.13309	-3.56	7.76795	4.10932	27.3437	1	1	0	2
BANCO POPULAR	Japan	19	0	15	2	13	0	0	0	0	1	4.02876	0.661939	0.887715	0.52605	0.0207448	0.416667	1.26844	4.4	0.0612047	2.6	8.10644	4.10932	27.3437	1	1	0	2
BANCO POPULAR	Latvia	19	0	3	0	3	0	0	0	0	1	3.43418	0.923385	0.149979	0.26461	0.312954	0.416667	-1.03204	8.9	3.9397	10.6	6.36182	4.10932	27.3437	1	1	0	2
BANCO POPULAR	Lithuania	19	0	2	0	2	0	0	0	0	1	3.41598	0.941538	0.270507	0.26461	0.206518	0.25	-1.29153	8.3	3.93337	7.56	6.5333	4.10932	27.3437	1	1	0	2
BANCO POPULAR	Luxembourg	19	0	8	1	7	0	0	0	0	1	3.11354	1.69208	0.929135	-0.25827	0.11085	0.166667	-1.55102	4.5	10.1045	4.03	5.65964	4.10932	27.3437	1	1	0	2
BANCO POPULAR	Malta	19	0	3	0	3	0	0	0	0	1	3.20679	1.13972	0.366184	0.52605	0.130339	0.333333	-1.55102	7.3	10.5646	2.49	5.60584	4.10932	27.3437	1	1	0	2
BANCO POPULAR	Morocco	19	0	40	1	39	0	0	0	0	1	2.94765	2.40856	0.965929	0.52605	1.13327	0.166667	1.27716	11	5.6818	1.72	7.47918	4.10932	27.3437	1	1	0	2
BANCO POPULAR	Mexico	19	0	68	5	63	0	0	0	0	1	3.96116	1.61593	0.61242	-3.86767	0.803904	0.333333	-1.55102	3.5	2.35186	2.8	8.01321	4.10932	27.3437	1	1	0	2
BANCO POPULAR	Nigeria	19	0	2	0	2	0	0	0	0	1	3.5664	2.38172	1.08093	0.26461	1.74765	0.666667	-0.530518	5.6	3.50758	6.1	8.15031	4.10932	27.3437	1	1	0	2
BANCO POPULAR	Norway	19	0	10	0	10	0	0	0	0	1	3.39007	0.558513	0.773884	0.26461	0.110833	0.166667	-1.04949	4.6	1.15494	2.26	6.66495	4.10932	27.3437	1	1	0	2
BANCO POPULAR	New Zealand	19	0	2	0	2	0	0	0	0	1	4.2904	0.485975	0.553697	0.26461	0.0975475	0.666667	-0.790003	3.8	1.46672	1.9	6.61267	4.10932	27.3437	1	1	0	2
BANCO POPULAR	Panama	19	0	24	3	21	0	0	0	0	1	3.91924	1.43673	0.720964	-3.38939	0.445543	0.666667	-1.29153	9.8	4.37245	6.91	6.5094	4.10932	27.3437	1	1	0	2
BANCO POPULAR	Peru	19	0	33	3	30	0	0	0	0	1	3.97657	1.42631	0.798443	-3.38939	0.983327	0.666667	-1.55102	5.2	3.2493	6.45	7.44667	4.10932	27.3437	1	1	0	2
BANCO POPULAR	Poland	19	0	53	3	50	0	0	0	0	1	3.33558	1.19959	0.38872	0.26461	0.0799061	0.25	-1.29153	17.7	2.54782	3.55	7.58167	4.10932	27.3437	1	1	0	2
BANCO POPULAR	Portugal	19	1	102	10	92	0	0	0	0	1	2.8324	0.769779	0.315828	-0.25827	0.0980653	0.166667	-1.29153	7.6	1.69826	0.37	7.02323	4.10932	27.3437	1	1	0	2
BANCO POPULAR	UK	19	0	68	4	64	0	0	0	0	1	3.15698	0.805554	0.679132	0.26461	0.00306242	0.5	-0.790003	4.7	7.47323	1.82	7.77979	4.10932	27.3437	1	1	0	2
BANCO POPULAR	Czech Republic	19	0	28	1	27	0	0	0	0	1	3.26204	0.685613	0.00167352	0.26461	0.00949857	0.666667	-1.03204	7.9	8.86508	6.08	7.01005	4.10932	27.3437	1	1	0	2
BANCO POPULAR	Romania	19	0	20	1	19	0	0	0	0	1	3.37913	1.01845	0.52496	-0.25827	0.348609	0.5	-0.790003	7.2	6.46266	4.1	7.33514	4.10932	27.3437	1	1	0	2
BANCO POPULAR	Rusia	19	0	24	1	23	0	0	0	0	1	3.62123	0.696054	0.111071	0.26461	0.792843	0.666667	-0.790003	7.1	1.90974	6.4	8.15568	4.10932	27.3437	1	1	0	2
BANCO POPULAR	Serbia	19	0	7	0	7	0	0	0	0	1	3.30011	1.33787	0.652569	0.26461	1.71416	0.333333	-0.790003	20.8	5.64939	4.68	6.90656	4.10932	27.3437	1	1	0	2
BANCO POPULAR	Singapur	19	0	13	1	12	0	0	0	0	1	4.05448	1.4349	0.479333	0.26461	1.00484	0.666667	1.00895	4.1	17.2101	6.62	6.63767	4.10932	27.3437	1	1	0	2
BANCO POPULAR	South Africa	19	0	14	0	14	0	0	0	0	1	3.91822	1.72008	0.6954	0.26461	0.167296	0	-0.790003	23.8	2.63118	5.1	7.67106	4.10932	27.3437	1	1	0	2
BANCO POPULAR	Sweden	19	0	15	0	15	0	0	0	0	1	3.3956	0.90496	0.81257	0.26461	0.108496	0	-0.790003	7.7	3.74326	2.7	6.9554	4.10932	27.3437	1	1	0	2
BANCO POPULAR	Switzerland	19	0	18	2	16	0	0	0	0	1	3.91415	0.836495	0.694867	-0.21367	0.150978	0.166667	-1.55102	4.4	1.57889	1.9	6.8714	4.10932	27.3437	1	1	0	2
BANCO POPULAR	Thailand	19	0	14	0	14	0	0	0	0	1	4.00637	1.44759	1.08846	0.52605	0.353899	0.666667	1.26844	1.3	2.09225	4.49	7.80776	4.10932	27.3437	1	1	0	2
BANCO POPULAR	Turquia	19	0	18	1	17	0	0	0	0	1	3.47222	1.60088	0.7561	0.52605	0.628774	0.666667	1.27716	10.6	2.66423	7.38	7.85772	4.10932	27.3437	1	1	0	2
BANCO POPULAR	Uruguay	19	0	23	3	20	0	0	0	0	1	3.99607	1.1487	0.233146	-3.86767	0.14597	0.666667	-1.29153	12.2	3.61146	6.56	6.51927	4.10932	27.3437	1	1	0	2
BANCO POPULAR	Venezuela	19	0	31	3	28	0	0	0	0	1	3.8557	1.76796	0.336214	-3.86767	0.309872	0.166667	-1.55102	11.4	2.04181	10.33	7.42451	4.10932	27.3437	1	1	0	2
BANCO SANTANDER CENTRAL HISPANO	Germany	20	1	56	2	54	0	0	0	0	1	3.21148	0.536164	0.562607	0.26461	0.0541978	0.666667	-1.29153	11.1	1.16865	0.96	7.91629	5.07364	14.6288	1	1	0	29
BANCO SANTANDER CENTRAL HISPANO	Argentina	20	1	61	4	57	0	0	0	0	1	4.00345	1.28036	0.249754	-3.86767	0.279269	0.666667	-1.55102	10.6	2.54485	9.18	7.58824	5.07364	14.6288	1	1	0	29
BANCO SANTANDER CENTRAL HISPANO	Australia	20	0	18	0	18	0	0	0	0	1	4.23231	0.567562	0.721527	0.26461	0.165512	0	-1.29153	5	-4.71452	2.8	7.30812	5.07364	14.6288	1	1	0	29
BANCO SANTANDER CENTRAL HISPANO	Austria	20	0	13	0	13	0	0	0	0	1	3.23123	0.588788	0.518591	0.26461	0.0931028	0.333333	-1.55102	5.2	2.91401	1.8	6.91557	5.07364	14.6288	1	1	0	29
BANCO SANTANDER CENTRAL HISPANO	Bangladesh	20	0	2	0	2	0	0	0	0	1	3.93561	2.63734	1.3076	0.26461	0.590559	0.333333	1.27716	4.3	1.15269	5.96	8.15174	5.07364	14.6288	1	1	0	29
BANCO SANTANDER CENTRAL HISPANO	Belgium	20	1	38	3	35	0	0	0	0	1	3.13244	0.777357	0.634216	-0.25827	0.130961	0.666667	-1.29153	8.4	6.38874	1.25	7.02031	5.07364	14.6288	1	1	0	29
BANCO SANTANDER CENTRAL HISPANO	Brasil	20	1	53	2	51	0	0	0	0	1	3.89327	1.91931	0.602092	-0.25827	0.406583	0.25	-1.55102	9.3	1.70724	2.94	8.27046	5.07364	14.6288	1	1	0	29
BANCO SANTANDER CENTRAL HISPANO	Bulgaria	20	0	13	0	13	0	0	0	0	1	3.36942	1.12444	0.190378	0.26461	0.191694	0.5	-0.790003	10.1	8.1765	6.25	6.88874	5.07364	14.6288	1	1	0	29
BANCO SANTANDER CENTRAL HISPANO	Canada	20	0	23	1	22	0	0	0	0	1	3.81425	0.103029	0.79255	-0.25827	0.161496	0.166667	-1.29153	6.7	3.0366	2.9	7.50919	5.07364	14.6288	1	1	0	29
BANCO SANTANDER CENTRAL HISPANO	Chile	20	1	49	3	46	0	0	0	0	1	4.03132	1.48778	0.490568	-3.86767	0.146208	0.416667	-1.55102	8	5.60687	5.71	7.21206	5.07364	14.6288	1	1	0	29
BANCO SANTANDER CENTRAL HISPANO	China	20	0	44	2	42	0	0	0	0	1	3.98191	1.90078	1.11489	0.52605	1.8939	0.333333	1.26844	4.2	3.22686	10.2	9.11544	5.07364	14.6288	1	1	0	29
BANCO SANTANDER CENTRAL HISPANO	Colombia	20	1	33	3	30	0	0	0	0	1	3.90663	1.54759	0.748636	-3.86767	0.629637	0.166667	-1.55102	12	8.29023	4.72	7.65269	5.07364	14.6288	1	1	0	29
BANCO SANTANDER CENTRAL HISPANO	South Korea	20	0	10	0	10	0	0	0	0	1	4.00439	0.420141	0.172921	0.52605	0.19628	0.541667	-0.271032	3.7	0.900652	4.2	7.68389	5.07364	14.6288	1	1	0	29
BANCO SANTANDER CENTRAL HISPANO	Costa Rica	20	0	15	1	14	0	0	0	0	1	3.93278	1.54875	0.662422	-3.86767	0.00206424	0	-1.55102	6.6	3.26941	5.91	6.63621	5.07364	14.6288	1	1	0	29
BANCO SANTANDER CENTRAL HISPANO	Croacia	20	0	8	0	8	0	0	0	0	1	3.22565	1.27885	0.253946	0.26461	1.01215	0.666667	-1.55102	12.6	4.3578	4.28	6.64771	5.07364	14.6288	1	1	0	29
BANCO SANTANDER CENTRAL HISPANO	Denmark	20	0	10	0	10	0	0	0	0	1	3.31418	0.590138	0.733766	0.26461	0.112828	0.166667	-1.04949	4.8	2.05207	3.05	6.73368	5.07364	14.6288	1	1	0	29
BANCO SANTANDER CENTRAL HISPANO	Ecuador	20	1	18	2	16	0	0	0	0	1	3.95347	1.61213	0.825643	-3.38939	0.280888	0.133333	-1.55102	7.7	5.24269	4.74	7.12151	5.07364	14.6288	1	1	0	29
BANCO SANTANDER CENTRAL HISPANO	El Salvador	20	0	12	1	11	0	0	0	0	1	3.94102	2.12139	0.718083	-3.86767	0.459103	0.666667	-1.55102	7.2	3.05173	2.75	6.83765	5.07364	14.6288	1	1	0	29
BANCO SANTANDER CENTRAL HISPANO	Slovakia	20	0	13	0	13	0	0	0	0	1	3.29809	0.931708	0.0511288	0.26461	0.296655	0.333333	-1.29153	16.2	4.02343	6.04	6.73135	5.07364	14.6288	1	1	0	29
BANCO SANTANDER CENTRAL HISPANO	Slovenia	20	0	6	0	6	0	0	0	0	1	3.20355	0.40353	0.182051	0.26461	0.101477	0.333333	-1.29153	6.5	1.4438	4.03	6.30114	5.07364	14.6288	1	1	0	29
BANCO SANTANDER CENTRAL HISPANO	USA	20	1	74	7	67	0	0	0	0	1	3.87141	0.553655	1.26073	-0.69195	0.15745	0.166667	-1.29153	5.1	0.800894	3.2	8.47189	5.07364	14.6288	1	1	0	29
BANCO SANTANDER CENTRAL HISPANO	Estonia	20	0	3	0	3	0	0	0	0	1	3.46571	0.927963	0.110104	0.26461	0.20986	0.666667	-0.530518	7.9	20.7518	10.47	6.12908	5.07364	14.6288	1	1	0	29
BANCO SANTANDER CENTRAL HISPANO	Ethiopia	20	0	2	0	2	0	0	0	0	1	3.72911	2.78128	1.3431	0.26461	1.26883	0.333333	-0.530518	5.4	1.80247	10.2	7.85282	5.07364	14.6288	1	1	0	29
BANCO SANTANDER CENTRAL HISPANO	Philippine	20	0	12	1	11	0	0	0	0	1	4.07154	1.53391	0.995918	0.26461	0.359399	0.208333	-1.55102	7.7	1.1508	4.97	7.91936	5.07364	14.6288	1	1	0	29
BANCO SANTANDER CENTRAL HISPANO	Finland	20	0	9	0	9	0	0	0	0	1	3.48105	0.507403	0.679478	0.52605	0.114138	0.0833333	-1.04949	8.4	2.36125	2.09	6.71984	5.07364	14.6288	1	1	0	29
BANCO SANTANDER CENTRAL HISPANO	France	20	1	80	5	75	0	0	0	0	1	2.98175	0.490732	0.583416	-0.25827	0.0417816	0.333333	-1.29153	8.9	2.98952	1.19	7.78442	5.07364	14.6288	1	1	0	29
BANCO SANTANDER CENTRAL HISPANO	Greece	20	0	20	1	19	0	0	0	0	1	3.35976	0.538884	0.215795	0.26461	0.101199	0.166667	-1.04949	9.8	0.269531	3.66	7.04548	5.07364	14.6288	1	1	0	29
BANCO SANTANDER CENTRAL HISPANO	The Netherlands	20	0	23	0	23	0	0	0	0	1	3.17633	0.566689	0.663452	0.26461	0.0980731	0	-1.29153	4.7	6.98972	1.13	7.21272	5.07364	14.6288	1	1	0	29
BANCO SANTANDER CENTRAL HISPANO	Hungary	20	0	20	1	19	0	0	0	0	1	3.29217	1.2511	0.147629	0.52605	0.00651064	0	-1.29153	7.2	6.0699	4.25	7.00376	5.07364	14.6288	1	1	0	29
BANCO SANTANDER CENTRAL HISPANO	India	20	0	18	1	17	0	0	0	0	1	3.88339	2.24326	1.22135	0.26461	0.405146	0.333333	1.26844	4.4	0.818883	9.23	9.03925	5.07364	14.6288	1	1	0	29
BANCO SANTANDER CENTRAL HISPANO	Ireland	20	0	19	1	18	0	0	0	0	1	3.18256	0.764228	0.019023	0.26461	0.0741923	0.666667	-1.55102	4.3	-11.284	5.5	6.619	5.07364	14.6288	1	1	0	29
BANCO SANTANDER CENTRAL HISPANO	Iceland	20	0	2	0	2	0	0	0	0	1	3.47432	0.957051	0.692716	0.26461	0.110148	0.666667	-1.04949	2.6	14.7276	5.53	5.47239	5.07364	14.6288	1	1	0	29
BANCO SANTANDER CENTRAL HISPANO	Israel	20	0	9	0	9	0	0	0	0	1	3.54353	1.46344	0.103381	-0.21367	0.110461	0	1.01767	9	4.52632	5.17	6.84033	5.07364	14.6288	1	1	0	29
BANCO SANTANDER CENTRAL HISPANO	Italy	20	1	65	3	62	0	0	0	0	1	3.12249	0.419623	0.297329	-0.25827	0.00573603	0.25	-1.29153	7.7	1.13309	-3.56	7.76795	5.07364	14.6288	1	1	0	29
BANCO SANTANDER CENTRAL HISPANO	Japan	20	1	15	2	13	0	0	0	0	1	4.02876	0.661939	0.887715	0.52605	0.0207448	0.416667	1.26844	4.4	0.0612047	2.6	8.10644	5.07364	14.6288	1	1	0	29
BANCO SANTANDER CENTRAL HISPANO	Latvia	20	0	3	0	3	0	0	0	0	1	3.43418	0.923385	0.149979	0.26461	0.312954	0.416667	-1.03204	8.9	3.9397	10.6	6.36182	5.07364	14.6288	1	1	0	29
BANCO SANTANDER CENTRAL HISPANO	Lithuania	20	0	2	0	2	0	0	0	0	1	3.41598	0.941538	0.270507	0.26461	0.206518	0.25	-1.29153	8.3	3.93337	7.56	6.5333	5.07364	14.6288	1	1	0	29
BANCO SANTANDER CENTRAL HISPANO	Luxembourg	20	1	8	1	7	0	0	0	0	1	3.11354	1.69208	0.929135	-0.25827	0.11085	0.166667	-1.55102	4.5	10.1045	4.03	5.65964	5.07364	14.6288	1	1	0	29
BANCO SANTANDER CENTRAL HISPANO	Malta	20	0	3	0	3	0	0	0	0	1	3.20679	1.13972	0.366184	0.52605	0.130339	0.333333	-1.55102	7.3	10.5646	2.49	5.60584	5.07364	14.6288	1	1	0	29
BANCO SANTANDER CENTRAL HISPANO	Morocco	20	1	40	1	39	0	0	0	0	1	2.94765	2.40856	0.965929	0.52605	1.13327	0.166667	1.27716	11	5.6818	1.72	7.47918	5.07364	14.6288	1	1	0	29
BANCO SANTANDER CENTRAL HISPANO	Mexico	20	1	68	5	63	0	0	0	0	1	3.96116	1.61593	0.61242	-3.86767	0.803904	0.333333	-1.55102	3.5	2.35186	2.8	8.01321	5.07364	14.6288	1	1	0	29
BANCO SANTANDER CENTRAL HISPANO	Nigeria	20	0	2	0	2	0	0	0	0	1	3.5664	2.38172	1.08093	0.26461	1.74765	0.666667	-0.530518	5.6	3.50758	6.1	8.15031	5.07364	14.6288	1	1	0	29
BANCO SANTANDER CENTRAL HISPANO	Norway	20	0	10	0	10	0	0	0	0	1	3.39007	0.558513	0.773884	0.26461	0.110833	0.166667	-1.04949	4.6	1.15494	2.26	6.66495	5.07364	14.6288	1	1	0	29
BANCO SANTANDER CENTRAL HISPANO	New Zealand	20	0	2	0	2	0	0	0	0	1	4.2904	0.485975	0.553697	0.26461	0.0975475	0.666667	-0.790003	3.8	1.46672	1.9	6.61267	5.07364	14.6288	1	1	0	29
BANCO SANTANDER CENTRAL HISPANO	Panama	20	1	24	3	21	0	0	0	0	1	3.91924	1.43673	0.720964	-3.38939	0.445543	0.666667	-1.29153	9.8	4.37245	6.91	6.5094	5.07364	14.6288	1	1	0	29
BANCO SANTANDER CENTRAL HISPANO	Peru	20	1	33	3	30	0	0	0	0	1	3.97657	1.42631	0.798443	-3.38939	0.983327	0.666667	-1.55102	5.2	3.2493	6.45	7.44667	5.07364	14.6288	1	1	0	29
BANCO SANTANDER CENTRAL HISPANO	Poland	20	1	53	3	50	0	0	0	0	1	3.33558	1.19959	0.38872	0.26461	0.0799061	0.25	-1.29153	17.7	2.54782	3.55	7.58167	5.07364	14.6288	1	1	0	29
BANCO SANTANDER CENTRAL HISPANO	Portugal	20	1	102	10	92	0	0	0	0	1	2.8324	0.769779	0.315828	-0.25827	0.0980653	0.166667	-1.29153	7.6	1.69826	0.37	7.02323	5.07364	14.6288	1	1	0	29
BANCO SANTANDER CENTRAL HISPANO	UK	20	1	68	4	64	0	0	0	0	1	3.15698	0.805554	0.679132	0.26461	0.00306242	0.5	-0.790003	4.7	7.47323	1.82	7.77979	5.07364	14.6288	1	1	0	29
BANCO SANTANDER CENTRAL HISPANO	Czech Republic	20	1	28	1	27	0	0	0	0	1	3.26204	0.685613	0.00167352	0.26461	0.00949857	0.666667	-1.03204	7.9	8.86508	6.08	7.01005	5.07364	14.6288	1	1	0	29
BANCO SANTANDER CENTRAL HISPANO	Romania	20	0	20	1	19	0	0	0	0	1	3.37913	1.01845	0.52496	-0.25827	0.348609	0.5	-0.790003	7.2	6.46266	4.1	7.33514	5.07364	14.6288	1	1	0	29
BANCO SANTANDER CENTRAL HISPANO	Rusia	20	0	24	1	23	0	0	0	0	1	3.62123	0.696054	0.111071	0.26461	0.792843	0.666667	-0.790003	7.1	1.90974	6.4	8.15568	5.07364	14.6288	1	1	0	29
BANCO SANTANDER CENTRAL HISPANO	Serbia	20	0	7	0	7	0	0	0	0	1	3.30011	1.33787	0.652569	0.26461	1.71416	0.333333	-0.790003	20.8	5.64939	4.68	6.90656	5.07364	14.6288	1	1	0	29
BANCO SANTANDER CENTRAL HISPANO	Singapur	20	0	13	1	12	0	0	0	0	1	4.05448	1.4349	0.479333	0.26461	1.00484	0.666667	1.00895	4.1	17.2101	6.62	6.63767	5.07364	14.6288	1	1	0	29
BANCO SANTANDER CENTRAL HISPANO	South Africa	20	0	14	0	14	0	0	0	0	1	3.91822	1.72008	0.6954	0.26461	0.167296	0	-0.790003	23.8	2.63118	5.1	7.67106	5.07364	14.6288	1	1	0	29
BANCO SANTANDER CENTRAL HISPANO	Sweden	20	0	15	0	15	0	0	0	0	1	3.3956	0.90496	0.81257	0.26461	0.108496	0	-0.790003	7.7	3.74326	2.7	6.9554	5.07364	14.6288	1	1	0	29
BANCO SANTANDER CENTRAL HISPANO	Switzerland	20	1	18	2	16	0	0	0	0	1	3.91415	0.836495	0.694867	-0.21367	0.150978	0.166667	-1.55102	4.4	1.57889	1.9	6.8714	5.07364	14.6288	1	1	0	29
BANCO SANTANDER CENTRAL HISPANO	Thailand	20	0	14	0	14	0	0	0	0	1	4.00637	1.44759	1.08846	0.52605	0.353899	0.666667	1.26844	1.3	2.09225	4.49	7.80776	5.07364	14.6288	1	1	0	29
BANCO SANTANDER CENTRAL HISPANO	Turquia	20	0	18	1	17	0	0	0	0	1	3.47222	1.60088	0.7561	0.52605	0.628774	0.666667	1.27716	10.6	2.66423	7.38	7.85772	5.07364	14.6288	1	1	0	29
BANCO SANTANDER CENTRAL HISPANO	Uruguay	20	1	23	3	20	0	0	0	0	1	3.99607	1.1487	0.233146	-3.86767	0.14597	0.666667	-1.29153	12.2	3.61146	6.56	6.51927	5.07364	14.6288	1	1	0	29
BANCO SANTANDER CENTRAL HISPANO	Venezuela	20	1	31	3	28	0	0	0	0	1	3.8557	1.76796	0.336214	-3.86767	0.309872	0.166667	-1.55102	11.4	2.04181	10.33	7.42451	5.07364	14.6288	1	1	0	29
BARCELO CORPORACION EMPRESARIAL SA	Germany	21	0	56	9	47	0	0	0	0	0	3.21148	0.536164	0.562607	0.26461	0.0541978	0.666667	-1.29153	11.1	1.16865	0.96	7.91629	3.8809	8.1174	0	1	0	28
BARCELO CORPORACION EMPRESARIAL SA	Argentina	21	0	61	18	43	0	0	0	0	0	4.00345	1.28036	0.249754	-3.86767	0.279269	0.666667	-1.55102	10.6	2.54485	9.18	7.58824	3.8809	8.1174	0	1	0	28
BARCELO CORPORACION EMPRESARIAL SA	Australia	21	0	18	0	18	0	0	0	0	0	4.23231	0.567562	0.721527	0.26461	0.165512	0	-1.29153	5	-4.71452	2.8	7.30812	3.8809	8.1174	0	1	0	28
BARCELO CORPORACION EMPRESARIAL SA	Austria	21	0	13	3	10	0	0	0	0	0	3.23123	0.588788	0.518591	0.26461	0.0931028	0.333333	-1.55102	5.2	2.91401	1.8	6.91557	3.8809	8.1174	0	1	0	28
BARCELO CORPORACION EMPRESARIAL SA	Bangladesh	21	0	2	1	1	0	0	0	0	0	3.93561	2.63734	1.3076	0.26461	0.590559	0.333333	1.27716	4.3	1.15269	5.96	8.15174	3.8809	8.1174	0	1	0	28
BARCELO CORPORACION EMPRESARIAL SA	Belgium	21	0	38	12	26	0	0	0	0	0	3.13244	0.777357	0.634216	-0.25827	0.130961	0.666667	-1.29153	8.4	6.38874	1.25	7.02031	3.8809	8.1174	0	1	0	28
BARCELO CORPORACION EMPRESARIAL SA	Brasil	21	1	53	11	42	0	0	0	0	0	3.89327	1.91931	0.602092	-0.25827	0.406583	0.25	-1.55102	9.3	1.70724	2.94	8.27046	3.8809	8.1174	0	1	0	28
BARCELO CORPORACION EMPRESARIAL SA	Bulgaria	21	1	13	2	11	0	0	0	0	0	3.36942	1.12444	0.190378	0.26461	0.191694	0.5	-0.790003	10.1	8.1765	6.25	6.88874	3.8809	8.1174	0	1	0	28
BARCELO CORPORACION EMPRESARIAL SA	Canada	21	0	23	2	21	0	0	0	0	0	3.81425	0.103029	0.79255	-0.25827	0.161496	0.166667	-1.29153	6.7	3.0366	2.9	7.50919	3.8809	8.1174	0	1	0	28
BARCELO CORPORACION EMPRESARIAL SA	Chile	21	1	49	12	37	0	0	0	0	0	4.03132	1.48778	0.490568	-3.86767	0.146208	0.416667	-1.55102	8	5.60687	5.71	7.21206	3.8809	8.1174	0	1	0	28
BARCELO CORPORACION EMPRESARIAL SA	China	21	0	44	6	38	0	0	0	0	0	3.98191	1.90078	1.11489	0.52605	1.8939	0.333333	1.26844	4.2	3.22686	10.2	9.11544	3.8809	8.1174	0	1	0	28
BARCELO CORPORACION EMPRESARIAL SA	Colombia	21	1	33	12	21	0	0	0	0	0	3.90663	1.54759	0.748636	-3.86767	0.629637	0.166667	-1.55102	12	8.29023	4.72	7.65269	3.8809	8.1174	0	1	0	28
BARCELO CORPORACION EMPRESARIAL SA	South Korea	21	0	10	0	10	0	0	0	0	0	4.00439	0.420141	0.172921	0.52605	0.19628	0.541667	-0.271032	3.7	0.900652	4.2	7.68389	3.8809	8.1174	0	1	0	28
BARCELO CORPORACION EMPRESARIAL SA	Costa Rica	21	1	15	6	9	0	0	0	0	0	3.93278	1.54875	0.662422	-3.86767	0.00206424	0	-1.55102	6.6	3.26941	5.91	6.63621	3.8809	8.1174	0	1	0	28
BARCELO CORPORACION EMPRESARIAL SA	Croacia	21	0	8	1	7	0	0	0	0	0	3.22565	1.27885	0.253946	0.26461	1.01215	0.666667	-1.55102	12.6	4.3578	4.28	6.64771	3.8809	8.1174	0	1	0	28
BARCELO CORPORACION EMPRESARIAL SA	Denmark	21	0	10	1	9	0	0	0	0	0	3.31418	0.590138	0.733766	0.26461	0.112828	0.166667	-1.04949	4.8	2.05207	3.05	6.73368	3.8809	8.1174	0	1	0	28
BARCELO CORPORACION EMPRESARIAL SA	Ecuador	21	1	18	5	13	0	0	0	0	0	3.95347	1.61213	0.825643	-3.38939	0.280888	0.133333	-1.55102	7.7	5.24269	4.74	7.12151	3.8809	8.1174	0	1	0	28
BARCELO CORPORACION EMPRESARIAL SA	El Salvador	21	1	12	2	10	0	0	0	0	0	3.94102	2.12139	0.718083	-3.86767	0.459103	0.666667	-1.55102	7.2	3.05173	2.75	6.83765	3.8809	8.1174	0	1	0	28
BARCELO CORPORACION EMPRESARIAL SA	Slovakia	21	0	13	1	12	0	0	0	0	0	3.29809	0.931708	0.0511288	0.26461	0.296655	0.333333	-1.29153	16.2	4.02343	6.04	6.73135	3.8809	8.1174	0	1	0	28
BARCELO CORPORACION EMPRESARIAL SA	Slovenia	21	0	6	0	6	0	0	0	0	0	3.20355	0.40353	0.182051	0.26461	0.101477	0.333333	-1.29153	6.5	1.4438	4.03	6.30114	3.8809	8.1174	0	1	0	28
BARCELO CORPORACION EMPRESARIAL SA	USA	21	1	74	13	61	0	0	0	0	0	3.87141	0.553655	1.26073	-0.69195	0.15745	0.166667	-1.29153	5.1	0.800894	3.2	8.47189	3.8809	8.1174	0	1	0	28
BARCELO CORPORACION EMPRESARIAL SA	Estonia	21	0	3	0	3	0	0	0	0	0	3.46571	0.927963	0.110104	0.26461	0.20986	0.666667	-0.530518	7.9	20.7518	10.47	6.12908	3.8809	8.1174	0	1	0	28
BARCELO CORPORACION EMPRESARIAL SA	Ethiopia	21	0	2	0	2	0	0	0	0	0	3.72911	2.78128	1.3431	0.26461	1.26883	0.333333	-0.530518	5.4	1.80247	10.2	7.85282	3.8809	8.1174	0	1	0	28
BARCELO CORPORACION EMPRESARIAL SA	Philippine	21	0	12	2	10	0	0	0	0	0	4.07154	1.53391	0.995918	0.26461	0.359399	0.208333	-1.55102	7.7	1.1508	4.97	7.91936	3.8809	8.1174	0	1	0	28
BARCELO CORPORACION EMPRESARIAL SA	Finland	21	0	9	2	7	0	0	0	0	0	3.48105	0.507403	0.679478	0.52605	0.114138	0.0833333	-1.04949	8.4	2.36125	2.09	6.71984	3.8809	8.1174	0	1	0	28
BARCELO CORPORACION EMPRESARIAL SA	France	21	1	80	16	64	0	0	0	0	0	2.98175	0.490732	0.583416	-0.25827	0.0417816	0.333333	-1.29153	8.9	2.98952	1.19	7.78442	3.8809	8.1174	0	1	0	28
BARCELO CORPORACION EMPRESARIAL SA	Greece	21	0	20	0	20	0	0	0	0	0	3.35976	0.538884	0.215795	0.26461	0.101199	0.166667	-1.04949	9.8	0.269531	3.66	7.04548	3.8809	8.1174	0	1	0	28
BARCELO CORPORACION EMPRESARIAL SA	The Netherlands	21	0	23	4	19	0	0	0	0	0	3.17633	0.566689	0.663452	0.26461	0.0980731	0	-1.29153	4.7	6.98972	1.13	7.21272	3.8809	8.1174	0	1	0	28
BARCELO CORPORACION EMPRESARIAL SA	Hungary	21	0	20	3	17	0	0	0	0	0	3.29217	1.2511	0.147629	0.52605	0.00651064	0	-1.29153	7.2	6.0699	4.25	7.00376	3.8809	8.1174	0	1	0	28
BARCELO CORPORACION EMPRESARIAL SA	India	21	0	18	1	17	0	0	0	0	0	3.88339	2.24326	1.22135	0.26461	0.405146	0.333333	1.26844	4.4	0.818883	9.23	9.03925	3.8809	8.1174	0	1	0	28
BARCELO CORPORACION EMPRESARIAL SA	Ireland	21	0	19	1	18	0	0	0	0	0	3.18256	0.764228	0.019023	0.26461	0.0741923	0.666667	-1.55102	4.3	-11.284	5.5	6.619	3.8809	8.1174	0	1	0	28
BARCELO CORPORACION EMPRESARIAL SA	Iceland	21	0	2	0	2	0	0	0	0	0	3.47432	0.957051	0.692716	0.26461	0.110148	0.666667	-1.04949	2.6	14.7276	5.53	5.47239	3.8809	8.1174	0	1	0	28
BARCELO CORPORACION EMPRESARIAL SA	Israel	21	0	9	2	7	0	0	0	0	0	3.54353	1.46344	0.103381	-0.21367	0.110461	0	1.01767	9	4.52632	5.17	6.84033	3.8809	8.1174	0	1	0	28
BARCELO CORPORACION EMPRESARIAL SA	Italy	21	0	65	13	52	0	0	0	0	0	3.12249	0.419623	0.297329	-0.25827	0.00573603	0.25	-1.29153	7.7	1.13309	-3.56	7.76795	3.8809	8.1174	0	1	0	28
BARCELO CORPORACION EMPRESARIAL SA	Japan	21	0	15	1	14	0	0	0	0	0	4.02876	0.661939	0.887715	0.52605	0.0207448	0.416667	1.26844	4.4	0.0612047	2.6	8.10644	3.8809	8.1174	0	1	0	28
BARCELO CORPORACION EMPRESARIAL SA	Latvia	21	0	3	0	3	0	0	0	0	0	3.43418	0.923385	0.149979	0.26461	0.312954	0.416667	-1.03204	8.9	3.9397	10.6	6.36182	3.8809	8.1174	0	1	0	28
BARCELO CORPORACION EMPRESARIAL SA	Lithuania	21	0	2	0	2	0	0	0	0	0	3.41598	0.941538	0.270507	0.26461	0.206518	0.25	-1.29153	8.3	3.93337	7.56	6.5333	3.8809	8.1174	0	1	0	28
BARCELO CORPORACION EMPRESARIAL SA	Luxembourg	21	0	8	1	7	0	0	0	0	0	3.11354	1.69208	0.929135	-0.25827	0.11085	0.166667	-1.55102	4.5	10.1045	4.03	5.65964	3.8809	8.1174	0	1	0	28
BARCELO CORPORACION EMPRESARIAL SA	Malta	21	0	3	1	2	0	0	0	0	0	3.20679	1.13972	0.366184	0.52605	0.130339	0.333333	-1.55102	7.3	10.5646	2.49	5.60584	3.8809	8.1174	0	1	0	28
BARCELO CORPORACION EMPRESARIAL SA	Morocco	21	1	40	6	34	0	0	0	0	0	2.94765	2.40856	0.965929	0.52605	1.13327	0.166667	1.27716	11	5.6818	1.72	7.47918	3.8809	8.1174	0	1	0	28
BARCELO CORPORACION EMPRESARIAL SA	Mexico	21	1	68	17	51	0	0	0	0	0	3.96116	1.61593	0.61242	-3.86767	0.803904	0.333333	-1.55102	3.5	2.35186	2.8	8.01321	3.8809	8.1174	0	1	0	28
BARCELO CORPORACION EMPRESARIAL SA	Nigeria	21	0	2	0	2	0	0	0	0	0	3.5664	2.38172	1.08093	0.26461	1.74765	0.666667	-0.530518	5.6	3.50758	6.1	8.15031	3.8809	8.1174	0	1	0	28
BARCELO CORPORACION EMPRESARIAL SA	Norway	21	0	10	1	9	0	0	0	0	0	3.39007	0.558513	0.773884	0.26461	0.110833	0.166667	-1.04949	4.6	1.15494	2.26	6.66495	3.8809	8.1174	0	1	0	28
BARCELO CORPORACION EMPRESARIAL SA	New Zealand	21	0	2	0	2	0	0	0	0	0	4.2904	0.485975	0.553697	0.26461	0.0975475	0.666667	-0.790003	3.8	1.46672	1.9	6.61267	3.8809	8.1174	0	1	0	28
BARCELO CORPORACION EMPRESARIAL SA	Panama	21	1	24	6	18	0	0	0	0	0	3.91924	1.43673	0.720964	-3.38939	0.445543	0.666667	-1.29153	9.8	4.37245	6.91	6.5094	3.8809	8.1174	0	1	0	28
BARCELO CORPORACION EMPRESARIAL SA	Peru	21	1	33	11	22	0	0	0	0	0	3.97657	1.42631	0.798443	-3.38939	0.983327	0.666667	-1.55102	5.2	3.2493	6.45	7.44667	3.8809	8.1174	0	1	0	28
BARCELO CORPORACION EMPRESARIAL SA	Poland	21	0	53	5	48	0	0	0	0	0	3.33558	1.19959	0.38872	0.26461	0.0799061	0.25	-1.29153	17.7	2.54782	3.55	7.58167	3.8809	8.1174	0	1	0	28
BARCELO CORPORACION EMPRESARIAL SA	Portugal	21	1	102	24	78	0	0	0	0	0	2.8324	0.769779	0.315828	-0.25827	0.0980653	0.166667	-1.29153	7.6	1.69826	0.37	7.02323	3.8809	8.1174	0	1	0	28
BARCELO CORPORACION EMPRESARIAL SA	UK	21	0	68	16	52	0	0	0	0	0	3.15698	0.805554	0.679132	0.26461	0.00306242	0.5	-0.790003	4.7	7.47323	1.82	7.77979	3.8809	8.1174	0	1	0	28
BARCELO CORPORACION EMPRESARIAL SA	Czech Republic	21	1	28	3	25	0	0	0	0	0	3.26204	0.685613	0.00167352	0.26461	0.00949857	0.666667	-1.03204	7.9	8.86508	6.08	7.01005	3.8809	8.1174	0	1	0	28
BARCELO CORPORACION EMPRESARIAL SA	Romania	21	0	20	4	16	0	0	0	0	0	3.37913	1.01845	0.52496	-0.25827	0.348609	0.5	-0.790003	7.2	6.46266	4.1	7.33514	3.8809	8.1174	0	1	0	28
BARCELO CORPORACION EMPRESARIAL SA	Rusia	21	0	24	2	22	0	0	0	0	0	3.62123	0.696054	0.111071	0.26461	0.792843	0.666667	-0.790003	7.1	1.90974	6.4	8.15568	3.8809	8.1174	0	1	0	28
BARCELO CORPORACION EMPRESARIAL SA	Serbia	21	0	7	0	7	0	0	0	0	0	3.30011	1.33787	0.652569	0.26461	1.71416	0.333333	-0.790003	20.8	5.64939	4.68	6.90656	3.8809	8.1174	0	1	0	28
BARCELO CORPORACION EMPRESARIAL SA	Singapur	21	0	13	2	11	0	0	0	0	0	4.05448	1.4349	0.479333	0.26461	1.00484	0.666667	1.00895	4.1	17.2101	6.62	6.63767	3.8809	8.1174	0	1	0	28
BARCELO CORPORACION EMPRESARIAL SA	South Africa	21	0	14	3	11	0	0	0	0	0	3.91822	1.72008	0.6954	0.26461	0.167296	0	-0.790003	23.8	2.63118	5.1	7.67106	3.8809	8.1174	0	1	0	28
BARCELO CORPORACION EMPRESARIAL SA	Sweden	21	0	15	2	13	0	0	0	0	0	3.3956	0.90496	0.81257	0.26461	0.108496	0	-0.790003	7.7	3.74326	2.7	6.9554	3.8809	8.1174	0	1	0	28
BARCELO CORPORACION EMPRESARIAL SA	Switzerland	21	0	18	5	13	0	0	0	0	0	3.91415	0.836495	0.694867	-0.21367	0.150978	0.166667	-1.55102	4.4	1.57889	1.9	6.8714	3.8809	8.1174	0	1	0	28
BARCELO CORPORACION EMPRESARIAL SA	Thailand	21	0	14	2	12	0	0	0	0	0	4.00637	1.44759	1.08846	0.52605	0.353899	0.666667	1.26844	1.3	2.09225	4.49	7.80776	3.8809	8.1174	0	1	0	28
BARCELO CORPORACION EMPRESARIAL SA	Turquia	21	1	18	1	17	0	0	0	0	0	3.47222	1.60088	0.7561	0.52605	0.628774	0.666667	1.27716	10.6	2.66423	7.38	7.85772	3.8809	8.1174	0	1	0	28
BARCELO CORPORACION EMPRESARIAL SA	Uruguay	21	1	23	9	14	0	0	0	0	0	3.99607	1.1487	0.233146	-3.86767	0.14597	0.666667	-1.29153	12.2	3.61146	6.56	6.51927	3.8809	8.1174	0	1	0	28
BARCELO CORPORACION EMPRESARIAL SA	Venezuela	21	1	31	9	22	0	0	0	0	0	3.8557	1.76796	0.336214	-3.86767	0.309872	0.166667	-1.55102	11.4	2.04181	10.33	7.42451	3.8809	8.1174	0	1	0	28
BIMBO SA	Germany	22	0	56	6	50	0	1	0	0	0	3.21148	0.536164	0.562607	0.26461	0.0541978	0.666667	-1.29153	11.1	1.16865	0.96	7.91629	3.13181	35.7736	0	1	0	1
BIMBO SA	Argentina	22	0	61	3	58	0	1	0	0	0	4.00345	1.28036	0.249754	-3.86767	0.279269	0.666667	-1.55102	10.6	2.54485	9.18	7.58824	3.13181	35.7736	0	1	0	1
BIMBO SA	Australia	22	0	18	2	16	0	1	0	0	0	4.23231	0.567562	0.721527	0.26461	0.165512	0	-1.29153	5	-4.71452	2.8	7.30812	3.13181	35.7736	0	1	0	1
BIMBO SA	Austria	22	0	13	0	13	0	1	0	0	0	3.23123	0.588788	0.518591	0.26461	0.0931028	0.333333	-1.55102	5.2	2.91401	1.8	6.91557	3.13181	35.7736	0	1	0	1
BIMBO SA	Bangladesh	22	0	2	0	2	0	1	0	0	0	3.93561	2.63734	1.3076	0.26461	0.590559	0.333333	1.27716	4.3	1.15269	5.96	8.15174	3.13181	35.7736	0	1	0	1
BIMBO SA	Belgium	22	0	38	2	36	0	1	0	0	0	3.13244	0.777357	0.634216	-0.25827	0.130961	0.666667	-1.29153	8.4	6.38874	1.25	7.02031	3.13181	35.7736	0	1	0	1
BIMBO SA	Brasil	22	0	53	3	50	0	1	0	0	0	3.89327	1.91931	0.602092	-0.25827	0.406583	0.25	-1.55102	9.3	1.70724	2.94	8.27046	3.13181	35.7736	0	1	0	1
BIMBO SA	Bulgaria	22	0	13	0	13	0	1	0	0	0	3.36942	1.12444	0.190378	0.26461	0.191694	0.5	-0.790003	10.1	8.1765	6.25	6.88874	3.13181	35.7736	0	1	0	1
BIMBO SA	Canada	22	0	23	3	20	0	1	0	0	0	3.81425	0.103029	0.79255	-0.25827	0.161496	0.166667	-1.29153	6.7	3.0366	2.9	7.50919	3.13181	35.7736	0	1	0	1
BIMBO SA	Chile	22	0	49	2	47	0	1	0	0	0	4.03132	1.48778	0.490568	-3.86767	0.146208	0.416667	-1.55102	8	5.60687	5.71	7.21206	3.13181	35.7736	0	1	0	1
BIMBO SA	China	22	0	44	3	41	0	1	0	0	0	3.98191	1.90078	1.11489	0.52605	1.8939	0.333333	1.26844	4.2	3.22686	10.2	9.11544	3.13181	35.7736	0	1	0	1
BIMBO SA	Colombia	22	0	33	0	33	0	1	0	0	0	3.90663	1.54759	0.748636	-3.86767	0.629637	0.166667	-1.55102	12	8.29023	4.72	7.65269	3.13181	35.7736	0	1	0	1
BIMBO SA	South Korea	22	0	10	1	9	0	1	0	0	0	4.00439	0.420141	0.172921	0.52605	0.19628	0.541667	-0.271032	3.7	0.900652	4.2	7.68389	3.13181	35.7736	0	1	0	1
BIMBO SA	Costa Rica	22	0	15	1	14	0	1	0	0	0	3.93278	1.54875	0.662422	-3.86767	0.00206424	0	-1.55102	6.6	3.26941	5.91	6.63621	3.13181	35.7736	0	1	0	1
BIMBO SA	Croacia	22	0	8	0	8	0	1	0	0	0	3.22565	1.27885	0.253946	0.26461	1.01215	0.666667	-1.55102	12.6	4.3578	4.28	6.64771	3.13181	35.7736	0	1	0	1
BIMBO SA	Denmark	22	0	10	1	9	0	1	0	0	0	3.31418	0.590138	0.733766	0.26461	0.112828	0.166667	-1.04949	4.8	2.05207	3.05	6.73368	3.13181	35.7736	0	1	0	1
BIMBO SA	Ecuador	22	0	18	1	17	0	1	0	0	0	3.95347	1.61213	0.825643	-3.38939	0.280888	0.133333	-1.55102	7.7	5.24269	4.74	7.12151	3.13181	35.7736	0	1	0	1
BIMBO SA	El Salvador	22	0	12	1	11	0	1	0	0	0	3.94102	2.12139	0.718083	-3.86767	0.459103	0.666667	-1.55102	7.2	3.05173	2.75	6.83765	3.13181	35.7736	0	1	0	1
BIMBO SA	Slovakia	22	0	13	0	13	0	1	0	0	0	3.29809	0.931708	0.0511288	0.26461	0.296655	0.333333	-1.29153	16.2	4.02343	6.04	6.73135	3.13181	35.7736	0	1	0	1
BIMBO SA	Slovenia	22	0	6	0	6	0	1	0	0	0	3.20355	0.40353	0.182051	0.26461	0.101477	0.333333	-1.29153	6.5	1.4438	4.03	6.30114	3.13181	35.7736	0	1	0	1
BIMBO SA	USA	22	0	74	11	63	0	1	0	0	0	3.87141	0.553655	1.26073	-0.69195	0.15745	0.166667	-1.29153	5.1	0.800894	3.2	8.47189	3.13181	35.7736	0	1	0	1
BIMBO SA	Estonia	22	0	3	0	3	0	1	0	0	0	3.46571	0.927963	0.110104	0.26461	0.20986	0.666667	-0.530518	7.9	20.7518	10.47	6.12908	3.13181	35.7736	0	1	0	1
BIMBO SA	Ethiopia	22	0	2	0	2	0	1	0	0	0	3.72911	2.78128	1.3431	0.26461	1.26883	0.333333	-0.530518	5.4	1.80247	10.2	7.85282	3.13181	35.7736	0	1	0	1
BIMBO SA	Philippine	22	0	12	0	12	0	1	0	0	0	4.07154	1.53391	0.995918	0.26461	0.359399	0.208333	-1.55102	7.7	1.1508	4.97	7.91936	3.13181	35.7736	0	1	0	1
BIMBO SA	Finland	22	0	9	1	8	0	1	0	0	0	3.48105	0.507403	0.679478	0.52605	0.114138	0.0833333	-1.04949	8.4	2.36125	2.09	6.71984	3.13181	35.7736	0	1	0	1
BIMBO SA	France	22	0	80	8	72	0	1	0	0	0	2.98175	0.490732	0.583416	-0.25827	0.0417816	0.333333	-1.29153	8.9	2.98952	1.19	7.78442	3.13181	35.7736	0	1	0	1
BIMBO SA	Greece	22	0	20	2	18	0	1	0	0	0	3.35976	0.538884	0.215795	0.26461	0.101199	0.166667	-1.04949	9.8	0.269531	3.66	7.04548	3.13181	35.7736	0	1	0	1
BIMBO SA	The Netherlands	22	0	23	2	21	0	1	0	0	0	3.17633	0.566689	0.663452	0.26461	0.0980731	0	-1.29153	4.7	6.98972	1.13	7.21272	3.13181	35.7736	0	1	0	1
BIMBO SA	Hungary	22	0	20	1	19	0	1	0	0	0	3.29217	1.2511	0.147629	0.52605	0.00651064	0	-1.29153	7.2	6.0699	4.25	7.00376	3.13181	35.7736	0	1	0	1
BIMBO SA	India	22	0	18	0	18	0	1	0	0	0	3.88339	2.24326	1.22135	0.26461	0.405146	0.333333	1.26844	4.4	0.818883	9.23	9.03925	3.13181	35.7736	0	1	0	1
BIMBO SA	Ireland	22	0	19	2	17	0	1	0	0	0	3.18256	0.764228	0.019023	0.26461	0.0741923	0.666667	-1.55102	4.3	-11.284	5.5	6.619	3.13181	35.7736	0	1	0	1
BIMBO SA	Iceland	22	0	2	0	2	0	1	0	0	0	3.47432	0.957051	0.692716	0.26461	0.110148	0.666667	-1.04949	2.6	14.7276	5.53	5.47239	3.13181	35.7736	0	1	0	1
BIMBO SA	Israel	22	0	9	1	8	0	1	0	0	0	3.54353	1.46344	0.103381	-0.21367	0.110461	0	1.01767	9	4.52632	5.17	6.84033	3.13181	35.7736	0	1	0	1
BIMBO SA	Italy	22	0	65	4	61	0	1	0	0	0	3.12249	0.419623	0.297329	-0.25827	0.00573603	0.25	-1.29153	7.7	1.13309	-3.56	7.76795	3.13181	35.7736	0	1	0	1
BIMBO SA	Japan	22	0	15	2	13	0	1	0	0	0	4.02876	0.661939	0.887715	0.52605	0.0207448	0.416667	1.26844	4.4	0.0612047	2.6	8.10644	3.13181	35.7736	0	1	0	1
BIMBO SA	Latvia	22	0	3	0	3	0	1	0	0	0	3.43418	0.923385	0.149979	0.26461	0.312954	0.416667	-1.03204	8.9	3.9397	10.6	6.36182	3.13181	35.7736	0	1	0	1
BIMBO SA	Lithuania	22	0	2	0	2	0	1	0	0	0	3.41598	0.941538	0.270507	0.26461	0.206518	0.25	-1.29153	8.3	3.93337	7.56	6.5333	3.13181	35.7736	0	1	0	1
BIMBO SA	Luxembourg	22	0	8	0	8	0	1	0	0	0	3.11354	1.69208	0.929135	-0.25827	0.11085	0.166667	-1.55102	4.5	10.1045	4.03	5.65964	3.13181	35.7736	0	1	0	1
BIMBO SA	Malta	22	0	3	0	3	0	1	0	0	0	3.20679	1.13972	0.366184	0.52605	0.130339	0.333333	-1.55102	7.3	10.5646	2.49	5.60584	3.13181	35.7736	0	1	0	1
BIMBO SA	Morocco	22	0	40	2	38	0	1	0	0	0	2.94765	2.40856	0.965929	0.52605	1.13327	0.166667	1.27716	11	5.6818	1.72	7.47918	3.13181	35.7736	0	1	0	1
BIMBO SA	Mexico	22	0	68	6	62	0	1	0	0	0	3.96116	1.61593	0.61242	-3.86767	0.803904	0.333333	-1.55102	3.5	2.35186	2.8	8.01321	3.13181	35.7736	0	1	0	1
BIMBO SA	Nigeria	22	0	2	0	2	0	1	0	0	0	3.5664	2.38172	1.08093	0.26461	1.74765	0.666667	-0.530518	5.6	3.50758	6.1	8.15031	3.13181	35.7736	0	1	0	1
BIMBO SA	Norway	22	0	10	0	10	0	1	0	0	0	3.39007	0.558513	0.773884	0.26461	0.110833	0.166667	-1.04949	4.6	1.15494	2.26	6.66495	3.13181	35.7736	0	1	0	1
BIMBO SA	New Zealand	22	0	2	0	2	0	1	0	0	0	4.2904	0.485975	0.553697	0.26461	0.0975475	0.666667	-0.790003	3.8	1.46672	1.9	6.61267	3.13181	35.7736	0	1	0	1
BIMBO SA	Panama	22	0	24	0	24	0	1	0	0	0	3.91924	1.43673	0.720964	-3.38939	0.445543	0.666667	-1.29153	9.8	4.37245	6.91	6.5094	3.13181	35.7736	0	1	0	1
BIMBO SA	Peru	22	0	33	2	31	0	1	0	0	0	3.97657	1.42631	0.798443	-3.38939	0.983327	0.666667	-1.55102	5.2	3.2493	6.45	7.44667	3.13181	35.7736	0	1	0	1
BIMBO SA	Poland	22	0	53	6	47	0	1	0	0	0	3.33558	1.19959	0.38872	0.26461	0.0799061	0.25	-1.29153	17.7	2.54782	3.55	7.58167	3.13181	35.7736	0	1	0	1
BIMBO SA	Portugal	22	1	102	9	93	0	1	0	0	0	2.8324	0.769779	0.315828	-0.25827	0.0980653	0.166667	-1.29153	7.6	1.69826	0.37	7.02323	3.13181	35.7736	0	1	0	1
BIMBO SA	UK	22	0	68	7	61	0	1	0	0	0	3.15698	0.805554	0.679132	0.26461	0.00306242	0.5	-0.790003	4.7	7.47323	1.82	7.77979	3.13181	35.7736	0	1	0	1
BIMBO SA	Czech Republic	22	0	28	3	25	0	1	0	0	0	3.26204	0.685613	0.00167352	0.26461	0.00949857	0.666667	-1.03204	7.9	8.86508	6.08	7.01005	3.13181	35.7736	0	1	0	1
BIMBO SA	Romania	22	0	20	1	19	0	1	0	0	0	3.37913	1.01845	0.52496	-0.25827	0.348609	0.5	-0.790003	7.2	6.46266	4.1	7.33514	3.13181	35.7736	0	1	0	1
BIMBO SA	Rusia	22	0	24	3	21	0	1	0	0	0	3.62123	0.696054	0.111071	0.26461	0.792843	0.666667	-0.790003	7.1	1.90974	6.4	8.15568	3.13181	35.7736	0	1	0	1
BIMBO SA	Serbia	22	0	7	1	6	0	1	0	0	0	3.30011	1.33787	0.652569	0.26461	1.71416	0.333333	-0.790003	20.8	5.64939	4.68	6.90656	3.13181	35.7736	0	1	0	1
BIMBO SA	Singapur	22	0	13	0	13	0	1	0	0	0	4.05448	1.4349	0.479333	0.26461	1.00484	0.666667	1.00895	4.1	17.2101	6.62	6.63767	3.13181	35.7736	0	1	0	1
BIMBO SA	South Africa	22	0	14	2	12	0	1	0	0	0	3.91822	1.72008	0.6954	0.26461	0.167296	0	-0.790003	23.8	2.63118	5.1	7.67106	3.13181	35.7736	0	1	0	1
BIMBO SA	Sweden	22	0	15	0	15	0	1	0	0	0	3.3956	0.90496	0.81257	0.26461	0.108496	0	-0.790003	7.7	3.74326	2.7	6.9554	3.13181	35.7736	0	1	0	1
BIMBO SA	Switzerland	22	0	18	0	18	0	1	0	0	0	3.91415	0.836495	0.694867	-0.21367	0.150978	0.166667	-1.55102	4.4	1.57889	1.9	6.8714	3.13181	35.7736	0	1	0	1
BIMBO SA	Thailand	22	0	14	2	12	0	1	0	0	0	4.00637	1.44759	1.08846	0.52605	0.353899	0.666667	1.26844	1.3	2.09225	4.49	7.80776	3.13181	35.7736	0	1	0	1
BIMBO SA	Turquia	22	0	18	0	18	0	1	0	0	0	3.47222	1.60088	0.7561	0.52605	0.628774	0.666667	1.27716	10.6	2.66423	7.38	7.85772	3.13181	35.7736	0	1	0	1
BIMBO SA	Uruguay	22	0	23	2	21	0	1	0	0	0	3.99607	1.1487	0.233146	-3.86767	0.14597	0.666667	-1.29153	12.2	3.61146	6.56	6.51927	3.13181	35.7736	0	1	0	1
BIMBO SA	Venezuela	22	0	31	0	31	0	1	0	0	0	3.8557	1.76796	0.336214	-3.86767	0.309872	0.166667	-1.55102	11.4	2.04181	10.33	7.42451	3.13181	35.7736	0	1	0	1
BORGES HOLDING S.L	Germany	23	0	56	29	27	1	0	0	0	0	3.21148	0.536164	0.562607	0.26461	0.0541978	0.666667	-1.29153	11.1	1.16865	0.96	7.91629	3.02864	6.47848	0	1	0	6
BORGES HOLDING S.L	Argentina	23	0	61	22	39	1	0	0	0	0	4.00345	1.28036	0.249754	-3.86767	0.279269	0.666667	-1.55102	10.6	2.54485	9.18	7.58824	3.02864	6.47848	0	1	0	6
BORGES HOLDING S.L	Australia	23	1	18	12	6	1	0	0	0	0	4.23231	0.567562	0.721527	0.26461	0.165512	0	-1.29153	5	-4.71452	2.8	7.30812	3.02864	6.47848	0	1	0	6
BORGES HOLDING S.L	Austria	23	0	13	10	3	1	0	0	0	0	3.23123	0.588788	0.518591	0.26461	0.0931028	0.333333	-1.55102	5.2	2.91401	1.8	6.91557	3.02864	6.47848	0	1	0	6
BORGES HOLDING S.L	Bangladesh	23	0	2	1	1	1	0	0	0	0	3.93561	2.63734	1.3076	0.26461	0.590559	0.333333	1.27716	4.3	1.15269	5.96	8.15174	3.02864	6.47848	0	1	0	6
BORGES HOLDING S.L	Belgium	23	0	38	15	23	1	0	0	0	0	3.13244	0.777357	0.634216	-0.25827	0.130961	0.666667	-1.29153	8.4	6.38874	1.25	7.02031	3.02864	6.47848	0	1	0	6
BORGES HOLDING S.L	Brasil	23	0	53	24	29	1	0	0	0	0	3.89327	1.91931	0.602092	-0.25827	0.406583	0.25	-1.55102	9.3	1.70724	2.94	8.27046	3.02864	6.47848	0	1	0	6
BORGES HOLDING S.L	Bulgaria	23	0	13	5	8	1	0	0	0	0	3.36942	1.12444	0.190378	0.26461	0.191694	0.5	-0.790003	10.1	8.1765	6.25	6.88874	3.02864	6.47848	0	1	0	6
BORGES HOLDING S.L	Canada	23	0	23	11	12	1	0	0	0	0	3.81425	0.103029	0.79255	-0.25827	0.161496	0.166667	-1.29153	6.7	3.0366	2.9	7.50919	3.02864	6.47848	0	1	0	6
BORGES HOLDING S.L	Chile	23	0	49	17	32	1	0	0	0	0	4.03132	1.48778	0.490568	-3.86767	0.146208	0.416667	-1.55102	8	5.60687	5.71	7.21206	3.02864	6.47848	0	1	0	6
BORGES HOLDING S.L	China	23	0	44	28	16	1	0	0	0	0	3.98191	1.90078	1.11489	0.52605	1.8939	0.333333	1.26844	4.2	3.22686	10.2	9.11544	3.02864	6.47848	0	1	0	6
BORGES HOLDING S.L	Colombia	23	0	33	7	26	1	0	0	0	0	3.90663	1.54759	0.748636	-3.86767	0.629637	0.166667	-1.55102	12	8.29023	4.72	7.65269	3.02864	6.47848	0	1	0	6
BORGES HOLDING S.L	South Korea	23	0	10	9	1	1	0	0	0	0	4.00439	0.420141	0.172921	0.52605	0.19628	0.541667	-0.271032	3.7	0.900652	4.2	7.68389	3.02864	6.47848	0	1	0	6
BORGES HOLDING S.L	Costa Rica	23	0	15	4	11	1	0	0	0	0	3.93278	1.54875	0.662422	-3.86767	0.00206424	0	-1.55102	6.6	3.26941	5.91	6.63621	3.02864	6.47848	0	1	0	6
BORGES HOLDING S.L	Croacia	23	0	8	5	3	1	0	0	0	0	3.22565	1.27885	0.253946	0.26461	1.01215	0.666667	-1.55102	12.6	4.3578	4.28	6.64771	3.02864	6.47848	0	1	0	6
BORGES HOLDING S.L	Denmark	23	0	10	6	4	1	0	0	0	0	3.31418	0.590138	0.733766	0.26461	0.112828	0.166667	-1.04949	4.8	2.05207	3.05	6.73368	3.02864	6.47848	0	1	0	6
BORGES HOLDING S.L	Ecuador	23	0	18	4	14	1	0	0	0	0	3.95347	1.61213	0.825643	-3.38939	0.280888	0.133333	-1.55102	7.7	5.24269	4.74	7.12151	3.02864	6.47848	0	1	0	6
BORGES HOLDING S.L	El Salvador	23	0	12	4	8	1	0	0	0	0	3.94102	2.12139	0.718083	-3.86767	0.459103	0.666667	-1.55102	7.2	3.05173	2.75	6.83765	3.02864	6.47848	0	1	0	6
BORGES HOLDING S.L	Slovakia	23	0	13	9	4	1	0	0	0	0	3.29809	0.931708	0.0511288	0.26461	0.296655	0.333333	-1.29153	16.2	4.02343	6.04	6.73135	3.02864	6.47848	0	1	0	6
BORGES HOLDING S.L	Slovenia	23	0	6	5	1	1	0	0	0	0	3.20355	0.40353	0.182051	0.26461	0.101477	0.333333	-1.29153	6.5	1.4438	4.03	6.30114	3.02864	6.47848	0	1	0	6
BORGES HOLDING S.L	USA	23	1	74	32	42	1	0	0	0	0	3.87141	0.553655	1.26073	-0.69195	0.15745	0.166667	-1.29153	5.1	0.800894	3.2	8.47189	3.02864	6.47848	0	1	0	6
BORGES HOLDING S.L	Estonia	23	0	3	2	1	1	0	0	0	0	3.46571	0.927963	0.110104	0.26461	0.20986	0.666667	-0.530518	7.9	20.7518	10.47	6.12908	3.02864	6.47848	0	1	0	6
BORGES HOLDING S.L	Ethiopia	23	0	2	0	2	1	0	0	0	0	3.72911	2.78128	1.3431	0.26461	1.26883	0.333333	-0.530518	5.4	1.80247	10.2	7.85282	3.02864	6.47848	0	1	0	6
BORGES HOLDING S.L	Philippine	23	0	12	8	4	1	0	0	0	0	4.07154	1.53391	0.995918	0.26461	0.359399	0.208333	-1.55102	7.7	1.1508	4.97	7.91936	3.02864	6.47848	0	1	0	6
BORGES HOLDING S.L	Finland	23	0	9	5	4	1	0	0	0	0	3.48105	0.507403	0.679478	0.52605	0.114138	0.0833333	-1.04949	8.4	2.36125	2.09	6.71984	3.02864	6.47848	0	1	0	6
BORGES HOLDING S.L	France	23	1	80	38	42	1	0	0	0	0	2.98175	0.490732	0.583416	-0.25827	0.0417816	0.333333	-1.29153	8.9	2.98952	1.19	7.78442	3.02864	6.47848	0	1	0	6
BORGES HOLDING S.L	Greece	23	0	20	11	9	1	0	0	0	0	3.35976	0.538884	0.215795	0.26461	0.101199	0.166667	-1.04949	9.8	0.269531	3.66	7.04548	3.02864	6.47848	0	1	0	6
BORGES HOLDING S.L	The Netherlands	23	0	23	15	8	1	0	0	0	0	3.17633	0.566689	0.663452	0.26461	0.0980731	0	-1.29153	4.7	6.98972	1.13	7.21272	3.02864	6.47848	0	1	0	6
BORGES HOLDING S.L	Hungary	23	0	20	12	8	1	0	0	0	0	3.29217	1.2511	0.147629	0.52605	0.00651064	0	-1.29153	7.2	6.0699	4.25	7.00376	3.02864	6.47848	0	1	0	6
BORGES HOLDING S.L	India	23	0	18	11	7	1	0	0	0	0	3.88339	2.24326	1.22135	0.26461	0.405146	0.333333	1.26844	4.4	0.818883	9.23	9.03925	3.02864	6.47848	0	1	0	6
BORGES HOLDING S.L	Ireland	23	0	19	7	12	1	0	0	0	0	3.18256	0.764228	0.019023	0.26461	0.0741923	0.666667	-1.55102	4.3	-11.284	5.5	6.619	3.02864	6.47848	0	1	0	6
BORGES HOLDING S.L	Iceland	23	0	2	2	0	1	0	0	0	0	3.47432	0.957051	0.692716	0.26461	0.110148	0.666667	-1.04949	2.6	14.7276	5.53	5.47239	3.02864	6.47848	0	1	0	6
BORGES HOLDING S.L	Israel	23	0	9	4	5	1	0	0	0	0	3.54353	1.46344	0.103381	-0.21367	0.110461	0	1.01767	9	4.52632	5.17	6.84033	3.02864	6.47848	0	1	0	6
BORGES HOLDING S.L	Italy	23	0	65	33	32	1	0	0	0	0	3.12249	0.419623	0.297329	-0.25827	0.00573603	0.25	-1.29153	7.7	1.13309	-3.56	7.76795	3.02864	6.47848	0	1	0	6
BORGES HOLDING S.L	Japan	23	0	15	10	5	1	0	0	0	0	4.02876	0.661939	0.887715	0.52605	0.0207448	0.416667	1.26844	4.4	0.0612047	2.6	8.10644	3.02864	6.47848	0	1	0	6
BORGES HOLDING S.L	Latvia	23	0	3	2	1	1	0	0	0	0	3.43418	0.923385	0.149979	0.26461	0.312954	0.416667	-1.03204	8.9	3.9397	10.6	6.36182	3.02864	6.47848	0	1	0	6
BORGES HOLDING S.L	Lithuania	23	0	2	2	0	1	0	0	0	0	3.41598	0.941538	0.270507	0.26461	0.206518	0.25	-1.29153	8.3	3.93337	7.56	6.5333	3.02864	6.47848	0	1	0	6
BORGES HOLDING S.L	Luxembourg	23	0	8	6	2	1	0	0	0	0	3.11354	1.69208	0.929135	-0.25827	0.11085	0.166667	-1.55102	4.5	10.1045	4.03	5.65964	3.02864	6.47848	0	1	0	6
BORGES HOLDING S.L	Malta	23	0	3	2	1	1	0	0	0	0	3.20679	1.13972	0.366184	0.52605	0.130339	0.333333	-1.55102	7.3	10.5646	2.49	5.60584	3.02864	6.47848	0	1	0	6
BORGES HOLDING S.L	Morocco	23	1	40	20	20	1	0	0	0	0	2.94765	2.40856	0.965929	0.52605	1.13327	0.166667	1.27716	11	5.6818	1.72	7.47918	3.02864	6.47848	0	1	0	6
BORGES HOLDING S.L	Mexico	23	0	68	26	42	1	0	0	0	0	3.96116	1.61593	0.61242	-3.86767	0.803904	0.333333	-1.55102	3.5	2.35186	2.8	8.01321	3.02864	6.47848	0	1	0	6
BORGES HOLDING S.L	Nigeria	23	0	2	1	1	1	0	0	0	0	3.5664	2.38172	1.08093	0.26461	1.74765	0.666667	-0.530518	5.6	3.50758	6.1	8.15031	3.02864	6.47848	0	1	0	6
BORGES HOLDING S.L	Norway	23	0	10	8	2	1	0	0	0	0	3.39007	0.558513	0.773884	0.26461	0.110833	0.166667	-1.04949	4.6	1.15494	2.26	6.66495	3.02864	6.47848	0	1	0	6
BORGES HOLDING S.L	New Zealand	23	0	2	2	0	1	0	0	0	0	4.2904	0.485975	0.553697	0.26461	0.0975475	0.666667	-0.790003	3.8	1.46672	1.9	6.61267	3.02864	6.47848	0	1	0	6
BORGES HOLDING S.L	Panama	23	0	24	7	17	1	0	0	0	0	3.91924	1.43673	0.720964	-3.38939	0.445543	0.666667	-1.29153	9.8	4.37245	6.91	6.5094	3.02864	6.47848	0	1	0	6
BORGES HOLDING S.L	Peru	23	0	33	8	25	1	0	0	0	0	3.97657	1.42631	0.798443	-3.38939	0.983327	0.666667	-1.55102	5.2	3.2493	6.45	7.44667	3.02864	6.47848	0	1	0	6
BORGES HOLDING S.L	Poland	23	0	53	27	26	1	0	0	0	0	3.33558	1.19959	0.38872	0.26461	0.0799061	0.25	-1.29153	17.7	2.54782	3.55	7.58167	3.02864	6.47848	0	1	0	6
BORGES HOLDING S.L	Portugal	23	0	102	38	64	1	0	0	0	0	2.8324	0.769779	0.315828	-0.25827	0.0980653	0.166667	-1.29153	7.6	1.69826	0.37	7.02323	3.02864	6.47848	0	1	0	6
BORGES HOLDING S.L	UK	23	0	68	27	41	1	0	0	0	0	3.15698	0.805554	0.679132	0.26461	0.00306242	0.5	-0.790003	4.7	7.47323	1.82	7.77979	3.02864	6.47848	0	1	0	6
BORGES HOLDING S.L	Czech Republic	23	0	28	18	10	1	0	0	0	0	3.26204	0.685613	0.00167352	0.26461	0.00949857	0.666667	-1.03204	7.9	8.86508	6.08	7.01005	3.02864	6.47848	0	1	0	6
BORGES HOLDING S.L	Romania	23	0	20	9	11	1	0	0	0	0	3.37913	1.01845	0.52496	-0.25827	0.348609	0.5	-0.790003	7.2	6.46266	4.1	7.33514	3.02864	6.47848	0	1	0	6
BORGES HOLDING S.L	Rusia	23	1	24	16	8	1	0	0	0	0	3.62123	0.696054	0.111071	0.26461	0.792843	0.666667	-0.790003	7.1	1.90974	6.4	8.15568	3.02864	6.47848	0	1	0	6
BORGES HOLDING S.L	Serbia	23	0	7	4	3	1	0	0	0	0	3.30011	1.33787	0.652569	0.26461	1.71416	0.333333	-0.790003	20.8	5.64939	4.68	6.90656	3.02864	6.47848	0	1	0	6
BORGES HOLDING S.L	Singapur	23	0	13	10	3	1	0	0	0	0	4.05448	1.4349	0.479333	0.26461	1.00484	0.666667	1.00895	4.1	17.2101	6.62	6.63767	3.02864	6.47848	0	1	0	6
BORGES HOLDING S.L	South Africa	23	0	14	6	8	1	0	0	0	0	3.91822	1.72008	0.6954	0.26461	0.167296	0	-0.790003	23.8	2.63118	5.1	7.67106	3.02864	6.47848	0	1	0	6
BORGES HOLDING S.L	Sweden	23	0	15	9	6	1	0	0	0	0	3.3956	0.90496	0.81257	0.26461	0.108496	0	-0.790003	7.7	3.74326	2.7	6.9554	3.02864	6.47848	0	1	0	6
BORGES HOLDING S.L	Switzerland	23	0	18	8	10	1	0	0	0	0	3.91415	0.836495	0.694867	-0.21367	0.150978	0.166667	-1.55102	4.4	1.57889	1.9	6.8714	3.02864	6.47848	0	1	0	6
BORGES HOLDING S.L	Thailand	23	0	14	10	4	1	0	0	0	0	4.00637	1.44759	1.08846	0.52605	0.353899	0.666667	1.26844	1.3	2.09225	4.49	7.80776	3.02864	6.47848	0	1	0	6
BORGES HOLDING S.L	Turquia	23	0	18	13	5	1	0	0	0	0	3.47222	1.60088	0.7561	0.52605	0.628774	0.666667	1.27716	10.6	2.66423	7.38	7.85772	3.02864	6.47848	0	1	0	6
BORGES HOLDING S.L	Uruguay	23	0	23	7	16	1	0	0	0	0	3.99607	1.1487	0.233146	-3.86767	0.14597	0.666667	-1.29153	12.2	3.61146	6.56	6.51927	3.02864	6.47848	0	1	0	6
BORGES HOLDING S.L	Venezuela	23	0	31	11	20	1	0	0	0	0	3.8557	1.76796	0.336214	-3.86767	0.309872	0.166667	-1.55102	11.4	2.04181	10.33	7.42451	3.02864	6.47848	0	1	0	6
CAIXA D´ESTALVIS I PENSIONS DE BARCELONA	Germany	24	0	56	2	54	0	0	0	0	1	3.21148	0.536164	0.562607	0.26461	0.0541978	0.666667	-1.29153	11.1	1.16865	0.96	7.91629	4.34399	16.4761	0	1	0	2
CAIXA D´ESTALVIS I PENSIONS DE BARCELONA	Argentina	24	0	61	4	57	0	0	0	0	1	4.00345	1.28036	0.249754	-3.86767	0.279269	0.666667	-1.55102	10.6	2.54485	9.18	7.58824	4.34399	16.4761	0	1	0	2
CAIXA D´ESTALVIS I PENSIONS DE BARCELONA	Australia	24	0	18	0	18	0	0	0	0	1	4.23231	0.567562	0.721527	0.26461	0.165512	0	-1.29153	5	-4.71452	2.8	7.30812	4.34399	16.4761	0	1	0	2
CAIXA D´ESTALVIS I PENSIONS DE BARCELONA	Austria	24	0	13	0	13	0	0	0	0	1	3.23123	0.588788	0.518591	0.26461	0.0931028	0.333333	-1.55102	5.2	2.91401	1.8	6.91557	4.34399	16.4761	0	1	0	2
CAIXA D´ESTALVIS I PENSIONS DE BARCELONA	Bangladesh	24	0	2	0	2	0	0	0	0	1	3.93561	2.63734	1.3076	0.26461	0.590559	0.333333	1.27716	4.3	1.15269	5.96	8.15174	4.34399	16.4761	0	1	0	2
CAIXA D´ESTALVIS I PENSIONS DE BARCELONA	Belgium	24	0	38	3	35	0	0	0	0	1	3.13244	0.777357	0.634216	-0.25827	0.130961	0.666667	-1.29153	8.4	6.38874	1.25	7.02031	4.34399	16.4761	0	1	0	2
CAIXA D´ESTALVIS I PENSIONS DE BARCELONA	Brasil	24	0	53	2	51	0	0	0	0	1	3.89327	1.91931	0.602092	-0.25827	0.406583	0.25	-1.55102	9.3	1.70724	2.94	8.27046	4.34399	16.4761	0	1	0	2
CAIXA D´ESTALVIS I PENSIONS DE BARCELONA	Bulgaria	24	0	13	0	13	0	0	0	0	1	3.36942	1.12444	0.190378	0.26461	0.191694	0.5	-0.790003	10.1	8.1765	6.25	6.88874	4.34399	16.4761	0	1	0	2
CAIXA D´ESTALVIS I PENSIONS DE BARCELONA	Canada	24	0	23	1	22	0	0	0	0	1	3.81425	0.103029	0.79255	-0.25827	0.161496	0.166667	-1.29153	6.7	3.0366	2.9	7.50919	4.34399	16.4761	0	1	0	2
CAIXA D´ESTALVIS I PENSIONS DE BARCELONA	Chile	24	0	49	3	46	0	0	0	0	1	4.03132	1.48778	0.490568	-3.86767	0.146208	0.416667	-1.55102	8	5.60687	5.71	7.21206	4.34399	16.4761	0	1	0	2
CAIXA D´ESTALVIS I PENSIONS DE BARCELONA	China	24	0	44	2	42	0	0	0	0	1	3.98191	1.90078	1.11489	0.52605	1.8939	0.333333	1.26844	4.2	3.22686	10.2	9.11544	4.34399	16.4761	0	1	0	2
CAIXA D´ESTALVIS I PENSIONS DE BARCELONA	Colombia	24	0	33	3	30	0	0	0	0	1	3.90663	1.54759	0.748636	-3.86767	0.629637	0.166667	-1.55102	12	8.29023	4.72	7.65269	4.34399	16.4761	0	1	0	2
CAIXA D´ESTALVIS I PENSIONS DE BARCELONA	South Korea	24	0	10	0	10	0	0	0	0	1	4.00439	0.420141	0.172921	0.52605	0.19628	0.541667	-0.271032	3.7	0.900652	4.2	7.68389	4.34399	16.4761	0	1	0	2
CAIXA D´ESTALVIS I PENSIONS DE BARCELONA	Costa Rica	24	0	15	1	14	0	0	0	0	1	3.93278	1.54875	0.662422	-3.86767	0.00206424	0	-1.55102	6.6	3.26941	5.91	6.63621	4.34399	16.4761	0	1	0	2
CAIXA D´ESTALVIS I PENSIONS DE BARCELONA	Croacia	24	0	8	0	8	0	0	0	0	1	3.22565	1.27885	0.253946	0.26461	1.01215	0.666667	-1.55102	12.6	4.3578	4.28	6.64771	4.34399	16.4761	0	1	0	2
CAIXA D´ESTALVIS I PENSIONS DE BARCELONA	Denmark	24	0	10	0	10	0	0	0	0	1	3.31418	0.590138	0.733766	0.26461	0.112828	0.166667	-1.04949	4.8	2.05207	3.05	6.73368	4.34399	16.4761	0	1	0	2
CAIXA D´ESTALVIS I PENSIONS DE BARCELONA	Ecuador	24	0	18	2	16	0	0	0	0	1	3.95347	1.61213	0.825643	-3.38939	0.280888	0.133333	-1.55102	7.7	5.24269	4.74	7.12151	4.34399	16.4761	0	1	0	2
CAIXA D´ESTALVIS I PENSIONS DE BARCELONA	El Salvador	24	0	12	1	11	0	0	0	0	1	3.94102	2.12139	0.718083	-3.86767	0.459103	0.666667	-1.55102	7.2	3.05173	2.75	6.83765	4.34399	16.4761	0	1	0	2
CAIXA D´ESTALVIS I PENSIONS DE BARCELONA	Slovakia	24	0	13	0	13	0	0	0	0	1	3.29809	0.931708	0.0511288	0.26461	0.296655	0.333333	-1.29153	16.2	4.02343	6.04	6.73135	4.34399	16.4761	0	1	0	2
CAIXA D´ESTALVIS I PENSIONS DE BARCELONA	Slovenia	24	0	6	0	6	0	0	0	0	1	3.20355	0.40353	0.182051	0.26461	0.101477	0.333333	-1.29153	6.5	1.4438	4.03	6.30114	4.34399	16.4761	0	1	0	2
CAIXA D´ESTALVIS I PENSIONS DE BARCELONA	USA	24	0	74	7	67	0	0	0	0	1	3.87141	0.553655	1.26073	-0.69195	0.15745	0.166667	-1.29153	5.1	0.800894	3.2	8.47189	4.34399	16.4761	0	1	0	2
CAIXA D´ESTALVIS I PENSIONS DE BARCELONA	Estonia	24	0	3	0	3	0	0	0	0	1	3.46571	0.927963	0.110104	0.26461	0.20986	0.666667	-0.530518	7.9	20.7518	10.47	6.12908	4.34399	16.4761	0	1	0	2
CAIXA D´ESTALVIS I PENSIONS DE BARCELONA	Ethiopia	24	0	2	0	2	0	0	0	0	1	3.72911	2.78128	1.3431	0.26461	1.26883	0.333333	-0.530518	5.4	1.80247	10.2	7.85282	4.34399	16.4761	0	1	0	2
CAIXA D´ESTALVIS I PENSIONS DE BARCELONA	Philippine	24	0	12	1	11	0	0	0	0	1	4.07154	1.53391	0.995918	0.26461	0.359399	0.208333	-1.55102	7.7	1.1508	4.97	7.91936	4.34399	16.4761	0	1	0	2
CAIXA D´ESTALVIS I PENSIONS DE BARCELONA	Finland	24	0	9	0	9	0	0	0	0	1	3.48105	0.507403	0.679478	0.52605	0.114138	0.0833333	-1.04949	8.4	2.36125	2.09	6.71984	4.34399	16.4761	0	1	0	2
CAIXA D´ESTALVIS I PENSIONS DE BARCELONA	France	24	0	80	5	75	0	0	0	0	1	2.98175	0.490732	0.583416	-0.25827	0.0417816	0.333333	-1.29153	8.9	2.98952	1.19	7.78442	4.34399	16.4761	0	1	0	2
CAIXA D´ESTALVIS I PENSIONS DE BARCELONA	Greece	24	0	20	1	19	0	0	0	0	1	3.35976	0.538884	0.215795	0.26461	0.101199	0.166667	-1.04949	9.8	0.269531	3.66	7.04548	4.34399	16.4761	0	1	0	2
CAIXA D´ESTALVIS I PENSIONS DE BARCELONA	The Netherlands	24	0	23	0	23	0	0	0	0	1	3.17633	0.566689	0.663452	0.26461	0.0980731	0	-1.29153	4.7	6.98972	1.13	7.21272	4.34399	16.4761	0	1	0	2
CAIXA D´ESTALVIS I PENSIONS DE BARCELONA	Hungary	24	0	20	1	19	0	0	0	0	1	3.29217	1.2511	0.147629	0.52605	0.00651064	0	-1.29153	7.2	6.0699	4.25	7.00376	4.34399	16.4761	0	1	0	2
CAIXA D´ESTALVIS I PENSIONS DE BARCELONA	India	24	0	18	1	17	0	0	0	0	1	3.88339	2.24326	1.22135	0.26461	0.405146	0.333333	1.26844	4.4	0.818883	9.23	9.03925	4.34399	16.4761	0	1	0	2
CAIXA D´ESTALVIS I PENSIONS DE BARCELONA	Ireland	24	0	19	1	18	0	0	0	0	1	3.18256	0.764228	0.019023	0.26461	0.0741923	0.666667	-1.55102	4.3	-11.284	5.5	6.619	4.34399	16.4761	0	1	0	2
CAIXA D´ESTALVIS I PENSIONS DE BARCELONA	Iceland	24	0	2	0	2	0	0	0	0	1	3.47432	0.957051	0.692716	0.26461	0.110148	0.666667	-1.04949	2.6	14.7276	5.53	5.47239	4.34399	16.4761	0	1	0	2
CAIXA D´ESTALVIS I PENSIONS DE BARCELONA	Israel	24	0	9	0	9	0	0	0	0	1	3.54353	1.46344	0.103381	-0.21367	0.110461	0	1.01767	9	4.52632	5.17	6.84033	4.34399	16.4761	0	1	0	2
CAIXA D´ESTALVIS I PENSIONS DE BARCELONA	Italy	24	0	65	3	62	0	0	0	0	1	3.12249	0.419623	0.297329	-0.25827	0.00573603	0.25	-1.29153	7.7	1.13309	-3.56	7.76795	4.34399	16.4761	0	1	0	2
CAIXA D´ESTALVIS I PENSIONS DE BARCELONA	Japan	24	0	15	2	13	0	0	0	0	1	4.02876	0.661939	0.887715	0.52605	0.0207448	0.416667	1.26844	4.4	0.0612047	2.6	8.10644	4.34399	16.4761	0	1	0	2
CAIXA D´ESTALVIS I PENSIONS DE BARCELONA	Latvia	24	0	3	0	3	0	0	0	0	1	3.43418	0.923385	0.149979	0.26461	0.312954	0.416667	-1.03204	8.9	3.9397	10.6	6.36182	4.34399	16.4761	0	1	0	2
CAIXA D´ESTALVIS I PENSIONS DE BARCELONA	Lithuania	24	0	2	0	2	0	0	0	0	1	3.41598	0.941538	0.270507	0.26461	0.206518	0.25	-1.29153	8.3	3.93337	7.56	6.5333	4.34399	16.4761	0	1	0	2
CAIXA D´ESTALVIS I PENSIONS DE BARCELONA	Luxembourg	24	0	8	1	7	0	0	0	0	1	3.11354	1.69208	0.929135	-0.25827	0.11085	0.166667	-1.55102	4.5	10.1045	4.03	5.65964	4.34399	16.4761	0	1	0	2
CAIXA D´ESTALVIS I PENSIONS DE BARCELONA	Malta	24	0	3	0	3	0	0	0	0	1	3.20679	1.13972	0.366184	0.52605	0.130339	0.333333	-1.55102	7.3	10.5646	2.49	5.60584	4.34399	16.4761	0	1	0	2
CAIXA D´ESTALVIS I PENSIONS DE BARCELONA	Morocco	24	0	40	1	39	0	0	0	0	1	2.94765	2.40856	0.965929	0.52605	1.13327	0.166667	1.27716	11	5.6818	1.72	7.47918	4.34399	16.4761	0	1	0	2
CAIXA D´ESTALVIS I PENSIONS DE BARCELONA	Mexico	24	0	68	5	63	0	0	0	0	1	3.96116	1.61593	0.61242	-3.86767	0.803904	0.333333	-1.55102	3.5	2.35186	2.8	8.01321	4.34399	16.4761	0	1	0	2
CAIXA D´ESTALVIS I PENSIONS DE BARCELONA	Nigeria	24	0	2	0	2	0	0	0	0	1	3.5664	2.38172	1.08093	0.26461	1.74765	0.666667	-0.530518	5.6	3.50758	6.1	8.15031	4.34399	16.4761	0	1	0	2
CAIXA D´ESTALVIS I PENSIONS DE BARCELONA	Norway	24	0	10	0	10	0	0	0	0	1	3.39007	0.558513	0.773884	0.26461	0.110833	0.166667	-1.04949	4.6	1.15494	2.26	6.66495	4.34399	16.4761	0	1	0	2
CAIXA D´ESTALVIS I PENSIONS DE BARCELONA	New Zealand	24	0	2	0	2	0	0	0	0	1	4.2904	0.485975	0.553697	0.26461	0.0975475	0.666667	-0.790003	3.8	1.46672	1.9	6.61267	4.34399	16.4761	0	1	0	2
CAIXA D´ESTALVIS I PENSIONS DE BARCELONA	Panama	24	0	24	3	21	0	0	0	0	1	3.91924	1.43673	0.720964	-3.38939	0.445543	0.666667	-1.29153	9.8	4.37245	6.91	6.5094	4.34399	16.4761	0	1	0	2
CAIXA D´ESTALVIS I PENSIONS DE BARCELONA	Peru	24	0	33	3	30	0	0	0	0	1	3.97657	1.42631	0.798443	-3.38939	0.983327	0.666667	-1.55102	5.2	3.2493	6.45	7.44667	4.34399	16.4761	0	1	0	2
CAIXA D´ESTALVIS I PENSIONS DE BARCELONA	Poland	24	1	53	3	50	0	0	0	0	1	3.33558	1.19959	0.38872	0.26461	0.0799061	0.25	-1.29153	17.7	2.54782	3.55	7.58167	4.34399	16.4761	0	1	0	2
CAIXA D´ESTALVIS I PENSIONS DE BARCELONA	Portugal	24	0	102	10	92	0	0	0	0	1	2.8324	0.769779	0.315828	-0.25827	0.0980653	0.166667	-1.29153	7.6	1.69826	0.37	7.02323	4.34399	16.4761	0	1	0	2
CAIXA D´ESTALVIS I PENSIONS DE BARCELONA	UK	24	0	68	4	64	0	0	0	0	1	3.15698	0.805554	0.679132	0.26461	0.00306242	0.5	-0.790003	4.7	7.47323	1.82	7.77979	4.34399	16.4761	0	1	0	2
CAIXA D´ESTALVIS I PENSIONS DE BARCELONA	Czech Republic	24	0	28	1	27	0	0	0	0	1	3.26204	0.685613	0.00167352	0.26461	0.00949857	0.666667	-1.03204	7.9	8.86508	6.08	7.01005	4.34399	16.4761	0	1	0	2
CAIXA D´ESTALVIS I PENSIONS DE BARCELONA	Romania	24	1	20	1	19	0	0	0	0	1	3.37913	1.01845	0.52496	-0.25827	0.348609	0.5	-0.790003	7.2	6.46266	4.1	7.33514	4.34399	16.4761	0	1	0	2
CAIXA D´ESTALVIS I PENSIONS DE BARCELONA	Rusia	24	0	24	1	23	0	0	0	0	1	3.62123	0.696054	0.111071	0.26461	0.792843	0.666667	-0.790003	7.1	1.90974	6.4	8.15568	4.34399	16.4761	0	1	0	2
CAIXA D´ESTALVIS I PENSIONS DE BARCELONA	Serbia	24	0	7	0	7	0	0	0	0	1	3.30011	1.33787	0.652569	0.26461	1.71416	0.333333	-0.790003	20.8	5.64939	4.68	6.90656	4.34399	16.4761	0	1	0	2
CAIXA D´ESTALVIS I PENSIONS DE BARCELONA	Singapur	24	0	13	1	12	0	0	0	0	1	4.05448	1.4349	0.479333	0.26461	1.00484	0.666667	1.00895	4.1	17.2101	6.62	6.63767	4.34399	16.4761	0	1	0	2
CAIXA D´ESTALVIS I PENSIONS DE BARCELONA	South Africa	24	0	14	0	14	0	0	0	0	1	3.91822	1.72008	0.6954	0.26461	0.167296	0	-0.790003	23.8	2.63118	5.1	7.67106	4.34399	16.4761	0	1	0	2
CAIXA D´ESTALVIS I PENSIONS DE BARCELONA	Sweden	24	0	15	0	15	0	0	0	0	1	3.3956	0.90496	0.81257	0.26461	0.108496	0	-0.790003	7.7	3.74326	2.7	6.9554	4.34399	16.4761	0	1	0	2
CAIXA D´ESTALVIS I PENSIONS DE BARCELONA	Switzerland	24	0	18	2	16	0	0	0	0	1	3.91415	0.836495	0.694867	-0.21367	0.150978	0.166667	-1.55102	4.4	1.57889	1.9	6.8714	4.34399	16.4761	0	1	0	2
CAIXA D´ESTALVIS I PENSIONS DE BARCELONA	Thailand	24	0	14	0	14	0	0	0	0	1	4.00637	1.44759	1.08846	0.52605	0.353899	0.666667	1.26844	1.3	2.09225	4.49	7.80776	4.34399	16.4761	0	1	0	2
CAIXA D´ESTALVIS I PENSIONS DE BARCELONA	Turquia	24	0	18	1	17	0	0	0	0	1	3.47222	1.60088	0.7561	0.52605	0.628774	0.666667	1.27716	10.6	2.66423	7.38	7.85772	4.34399	16.4761	0	1	0	2
CAIXA D´ESTALVIS I PENSIONS DE BARCELONA	Uruguay	24	0	23	3	20	0	0	0	0	1	3.99607	1.1487	0.233146	-3.86767	0.14597	0.666667	-1.29153	12.2	3.61146	6.56	6.51927	4.34399	16.4761	0	1	0	2
CAIXA D´ESTALVIS I PENSIONS DE BARCELONA	Venezuela	24	0	31	3	28	0	0	0	0	1	3.8557	1.76796	0.336214	-3.86767	0.309872	0.166667	-1.55102	11.4	2.04181	10.33	7.42451	4.34399	16.4761	0	1	0	2
CAIXAGALICIA	Germany	25	0	56	2	54	0	0	0	0	1	3.21148	0.536164	0.562607	0.26461	0.0541978	0.666667	-1.29153	11.1	1.16865	0.96	7.91629	3.57507	13.9917	0	1	0	1
CAIXAGALICIA	Argentina	25	0	61	4	57	0	0	0	0	1	4.00345	1.28036	0.249754	-3.86767	0.279269	0.666667	-1.55102	10.6	2.54485	9.18	7.58824	3.57507	13.9917	0	1	0	1
CAIXAGALICIA	Australia	25	0	18	0	18	0	0	0	0	1	4.23231	0.567562	0.721527	0.26461	0.165512	0	-1.29153	5	-4.71452	2.8	7.30812	3.57507	13.9917	0	1	0	1
CAIXAGALICIA	Austria	25	0	13	0	13	0	0	0	0	1	3.23123	0.588788	0.518591	0.26461	0.0931028	0.333333	-1.55102	5.2	2.91401	1.8	6.91557	3.57507	13.9917	0	1	0	1
CAIXAGALICIA	Bangladesh	25	0	2	0	2	0	0	0	0	1	3.93561	2.63734	1.3076	0.26461	0.590559	0.333333	1.27716	4.3	1.15269	5.96	8.15174	3.57507	13.9917	0	1	0	1
CAIXAGALICIA	Belgium	25	0	38	3	35	0	0	0	0	1	3.13244	0.777357	0.634216	-0.25827	0.130961	0.666667	-1.29153	8.4	6.38874	1.25	7.02031	3.57507	13.9917	0	1	0	1
CAIXAGALICIA	Brasil	25	0	53	2	51	0	0	0	0	1	3.89327	1.91931	0.602092	-0.25827	0.406583	0.25	-1.55102	9.3	1.70724	2.94	8.27046	3.57507	13.9917	0	1	0	1
CAIXAGALICIA	Bulgaria	25	0	13	0	13	0	0	0	0	1	3.36942	1.12444	0.190378	0.26461	0.191694	0.5	-0.790003	10.1	8.1765	6.25	6.88874	3.57507	13.9917	0	1	0	1
CAIXAGALICIA	Canada	25	0	23	1	22	0	0	0	0	1	3.81425	0.103029	0.79255	-0.25827	0.161496	0.166667	-1.29153	6.7	3.0366	2.9	7.50919	3.57507	13.9917	0	1	0	1
CAIXAGALICIA	Chile	25	0	49	3	46	0	0	0	0	1	4.03132	1.48778	0.490568	-3.86767	0.146208	0.416667	-1.55102	8	5.60687	5.71	7.21206	3.57507	13.9917	0	1	0	1
CAIXAGALICIA	China	25	0	44	2	42	0	0	0	0	1	3.98191	1.90078	1.11489	0.52605	1.8939	0.333333	1.26844	4.2	3.22686	10.2	9.11544	3.57507	13.9917	0	1	0	1
CAIXAGALICIA	Colombia	25	0	33	3	30	0	0	0	0	1	3.90663	1.54759	0.748636	-3.86767	0.629637	0.166667	-1.55102	12	8.29023	4.72	7.65269	3.57507	13.9917	0	1	0	1
CAIXAGALICIA	South Korea	25	0	10	0	10	0	0	0	0	1	4.00439	0.420141	0.172921	0.52605	0.19628	0.541667	-0.271032	3.7	0.900652	4.2	7.68389	3.57507	13.9917	0	1	0	1
CAIXAGALICIA	Costa Rica	25	0	15	1	14	0	0	0	0	1	3.93278	1.54875	0.662422	-3.86767	0.00206424	0	-1.55102	6.6	3.26941	5.91	6.63621	3.57507	13.9917	0	1	0	1
CAIXAGALICIA	Croacia	25	0	8	0	8	0	0	0	0	1	3.22565	1.27885	0.253946	0.26461	1.01215	0.666667	-1.55102	12.6	4.3578	4.28	6.64771	3.57507	13.9917	0	1	0	1
CAIXAGALICIA	Denmark	25	0	10	0	10	0	0	0	0	1	3.31418	0.590138	0.733766	0.26461	0.112828	0.166667	-1.04949	4.8	2.05207	3.05	6.73368	3.57507	13.9917	0	1	0	1
CAIXAGALICIA	Ecuador	25	0	18	2	16	0	0	0	0	1	3.95347	1.61213	0.825643	-3.38939	0.280888	0.133333	-1.55102	7.7	5.24269	4.74	7.12151	3.57507	13.9917	0	1	0	1
CAIXAGALICIA	El Salvador	25	0	12	1	11	0	0	0	0	1	3.94102	2.12139	0.718083	-3.86767	0.459103	0.666667	-1.55102	7.2	3.05173	2.75	6.83765	3.57507	13.9917	0	1	0	1
CAIXAGALICIA	Slovakia	25	0	13	0	13	0	0	0	0	1	3.29809	0.931708	0.0511288	0.26461	0.296655	0.333333	-1.29153	16.2	4.02343	6.04	6.73135	3.57507	13.9917	0	1	0	1
CAIXAGALICIA	Slovenia	25	0	6	0	6	0	0	0	0	1	3.20355	0.40353	0.182051	0.26461	0.101477	0.333333	-1.29153	6.5	1.4438	4.03	6.30114	3.57507	13.9917	0	1	0	1
CAIXAGALICIA	USA	25	0	74	7	67	0	0	0	0	1	3.87141	0.553655	1.26073	-0.69195	0.15745	0.166667	-1.29153	5.1	0.800894	3.2	8.47189	3.57507	13.9917	0	1	0	1
CAIXAGALICIA	Estonia	25	0	3	0	3	0	0	0	0	1	3.46571	0.927963	0.110104	0.26461	0.20986	0.666667	-0.530518	7.9	20.7518	10.47	6.12908	3.57507	13.9917	0	1	0	1
CAIXAGALICIA	Ethiopia	25	0	2	0	2	0	0	0	0	1	3.72911	2.78128	1.3431	0.26461	1.26883	0.333333	-0.530518	5.4	1.80247	10.2	7.85282	3.57507	13.9917	0	1	0	1
CAIXAGALICIA	Philippine	25	0	12	1	11	0	0	0	0	1	4.07154	1.53391	0.995918	0.26461	0.359399	0.208333	-1.55102	7.7	1.1508	4.97	7.91936	3.57507	13.9917	0	1	0	1
CAIXAGALICIA	Finland	25	0	9	0	9	0	0	0	0	1	3.48105	0.507403	0.679478	0.52605	0.114138	0.0833333	-1.04949	8.4	2.36125	2.09	6.71984	3.57507	13.9917	0	1	0	1
CAIXAGALICIA	France	25	0	80	5	75	0	0	0	0	1	2.98175	0.490732	0.583416	-0.25827	0.0417816	0.333333	-1.29153	8.9	2.98952	1.19	7.78442	3.57507	13.9917	0	1	0	1
CAIXAGALICIA	Greece	25	0	20	1	19	0	0	0	0	1	3.35976	0.538884	0.215795	0.26461	0.101199	0.166667	-1.04949	9.8	0.269531	3.66	7.04548	3.57507	13.9917	0	1	0	1
CAIXAGALICIA	The Netherlands	25	0	23	0	23	0	0	0	0	1	3.17633	0.566689	0.663452	0.26461	0.0980731	0	-1.29153	4.7	6.98972	1.13	7.21272	3.57507	13.9917	0	1	0	1
CAIXAGALICIA	Hungary	25	0	20	1	19	0	0	0	0	1	3.29217	1.2511	0.147629	0.52605	0.00651064	0	-1.29153	7.2	6.0699	4.25	7.00376	3.57507	13.9917	0	1	0	1
CAIXAGALICIA	India	25	0	18	1	17	0	0	0	0	1	3.88339	2.24326	1.22135	0.26461	0.405146	0.333333	1.26844	4.4	0.818883	9.23	9.03925	3.57507	13.9917	0	1	0	1
CAIXAGALICIA	Ireland	25	0	19	1	18	0	0	0	0	1	3.18256	0.764228	0.019023	0.26461	0.0741923	0.666667	-1.55102	4.3	-11.284	5.5	6.619	3.57507	13.9917	0	1	0	1
CAIXAGALICIA	Iceland	25	0	2	0	2	0	0	0	0	1	3.47432	0.957051	0.692716	0.26461	0.110148	0.666667	-1.04949	2.6	14.7276	5.53	5.47239	3.57507	13.9917	0	1	0	1
CAIXAGALICIA	Israel	25	0	9	0	9	0	0	0	0	1	3.54353	1.46344	0.103381	-0.21367	0.110461	0	1.01767	9	4.52632	5.17	6.84033	3.57507	13.9917	0	1	0	1
CAIXAGALICIA	Italy	25	0	65	3	62	0	0	0	0	1	3.12249	0.419623	0.297329	-0.25827	0.00573603	0.25	-1.29153	7.7	1.13309	-3.56	7.76795	3.57507	13.9917	0	1	0	1
CAIXAGALICIA	Japan	25	0	15	2	13	0	0	0	0	1	4.02876	0.661939	0.887715	0.52605	0.0207448	0.416667	1.26844	4.4	0.0612047	2.6	8.10644	3.57507	13.9917	0	1	0	1
CAIXAGALICIA	Latvia	25	0	3	0	3	0	0	0	0	1	3.43418	0.923385	0.149979	0.26461	0.312954	0.416667	-1.03204	8.9	3.9397	10.6	6.36182	3.57507	13.9917	0	1	0	1
CAIXAGALICIA	Lithuania	25	0	2	0	2	0	0	0	0	1	3.41598	0.941538	0.270507	0.26461	0.206518	0.25	-1.29153	8.3	3.93337	7.56	6.5333	3.57507	13.9917	0	1	0	1
CAIXAGALICIA	Luxembourg	25	0	8	1	7	0	0	0	0	1	3.11354	1.69208	0.929135	-0.25827	0.11085	0.166667	-1.55102	4.5	10.1045	4.03	5.65964	3.57507	13.9917	0	1	0	1
CAIXAGALICIA	Malta	25	0	3	0	3	0	0	0	0	1	3.20679	1.13972	0.366184	0.52605	0.130339	0.333333	-1.55102	7.3	10.5646	2.49	5.60584	3.57507	13.9917	0	1	0	1
CAIXAGALICIA	Morocco	25	0	40	1	39	0	0	0	0	1	2.94765	2.40856	0.965929	0.52605	1.13327	0.166667	1.27716	11	5.6818	1.72	7.47918	3.57507	13.9917	0	1	0	1
CAIXAGALICIA	Mexico	25	0	68	5	63	0	0	0	0	1	3.96116	1.61593	0.61242	-3.86767	0.803904	0.333333	-1.55102	3.5	2.35186	2.8	8.01321	3.57507	13.9917	0	1	0	1
CAIXAGALICIA	Nigeria	25	0	2	0	2	0	0	0	0	1	3.5664	2.38172	1.08093	0.26461	1.74765	0.666667	-0.530518	5.6	3.50758	6.1	8.15031	3.57507	13.9917	0	1	0	1
CAIXAGALICIA	Norway	25	0	10	0	10	0	0	0	0	1	3.39007	0.558513	0.773884	0.26461	0.110833	0.166667	-1.04949	4.6	1.15494	2.26	6.66495	3.57507	13.9917	0	1	0	1
CAIXAGALICIA	New Zealand	25	0	2	0	2	0	0	0	0	1	4.2904	0.485975	0.553697	0.26461	0.0975475	0.666667	-0.790003	3.8	1.46672	1.9	6.61267	3.57507	13.9917	0	1	0	1
CAIXAGALICIA	Panama	25	0	24	3	21	0	0	0	0	1	3.91924	1.43673	0.720964	-3.38939	0.445543	0.666667	-1.29153	9.8	4.37245	6.91	6.5094	3.57507	13.9917	0	1	0	1
CAIXAGALICIA	Peru	25	0	33	3	30	0	0	0	0	1	3.97657	1.42631	0.798443	-3.38939	0.983327	0.666667	-1.55102	5.2	3.2493	6.45	7.44667	3.57507	13.9917	0	1	0	1
CAIXAGALICIA	Poland	25	0	53	3	50	0	0	0	0	1	3.33558	1.19959	0.38872	0.26461	0.0799061	0.25	-1.29153	17.7	2.54782	3.55	7.58167	3.57507	13.9917	0	1	0	1
CAIXAGALICIA	Portugal	25	1	102	10	92	0	0	0	0	1	2.8324	0.769779	0.315828	-0.25827	0.0980653	0.166667	-1.29153	7.6	1.69826	0.37	7.02323	3.57507	13.9917	0	1	0	1
CAIXAGALICIA	UK	25	0	68	4	64	0	0	0	0	1	3.15698	0.805554	0.679132	0.26461	0.00306242	0.5	-0.790003	4.7	7.47323	1.82	7.77979	3.57507	13.9917	0	1	0	1
CAIXAGALICIA	Czech Republic	25	0	28	1	27	0	0	0	0	1	3.26204	0.685613	0.00167352	0.26461	0.00949857	0.666667	-1.03204	7.9	8.86508	6.08	7.01005	3.57507	13.9917	0	1	0	1
CAIXAGALICIA	Romania	25	0	20	1	19	0	0	0	0	1	3.37913	1.01845	0.52496	-0.25827	0.348609	0.5	-0.790003	7.2	6.46266	4.1	7.33514	3.57507	13.9917	0	1	0	1
CAIXAGALICIA	Rusia	25	0	24	1	23	0	0	0	0	1	3.62123	0.696054	0.111071	0.26461	0.792843	0.666667	-0.790003	7.1	1.90974	6.4	8.15568	3.57507	13.9917	0	1	0	1
CAIXAGALICIA	Serbia	25	0	7	0	7	0	0	0	0	1	3.30011	1.33787	0.652569	0.26461	1.71416	0.333333	-0.790003	20.8	5.64939	4.68	6.90656	3.57507	13.9917	0	1	0	1
CAIXAGALICIA	Singapur	25	0	13	1	12	0	0	0	0	1	4.05448	1.4349	0.479333	0.26461	1.00484	0.666667	1.00895	4.1	17.2101	6.62	6.63767	3.57507	13.9917	0	1	0	1
CAIXAGALICIA	South Africa	25	0	14	0	14	0	0	0	0	1	3.91822	1.72008	0.6954	0.26461	0.167296	0	-0.790003	23.8	2.63118	5.1	7.67106	3.57507	13.9917	0	1	0	1
CAIXAGALICIA	Sweden	25	0	15	0	15	0	0	0	0	1	3.3956	0.90496	0.81257	0.26461	0.108496	0	-0.790003	7.7	3.74326	2.7	6.9554	3.57507	13.9917	0	1	0	1
CAIXAGALICIA	Switzerland	25	0	18	2	16	0	0	0	0	1	3.91415	0.836495	0.694867	-0.21367	0.150978	0.166667	-1.55102	4.4	1.57889	1.9	6.8714	3.57507	13.9917	0	1	0	1
CAIXAGALICIA	Thailand	25	0	14	0	14	0	0	0	0	1	4.00637	1.44759	1.08846	0.52605	0.353899	0.666667	1.26844	1.3	2.09225	4.49	7.80776	3.57507	13.9917	0	1	0	1
CAIXAGALICIA	Turquia	25	0	18	1	17	0	0	0	0	1	3.47222	1.60088	0.7561	0.52605	0.628774	0.666667	1.27716	10.6	2.66423	7.38	7.85772	3.57507	13.9917	0	1	0	1
CAIXAGALICIA	Uruguay	25	0	23	3	20	0	0	0	0	1	3.99607	1.1487	0.233146	-3.86767	0.14597	0.666667	-1.29153	12.2	3.61146	6.56	6.51927	3.57507	13.9917	0	1	0	1
CAIXAGALICIA	Venezuela	25	0	31	3	28	0	0	0	0	1	3.8557	1.76796	0.336214	-3.86767	0.309872	0.166667	-1.55102	11.4	2.04181	10.33	7.42451	3.57507	13.9917	0	1	0	1
CAIXANOVA	Germany	26	0	56	2	54	0	0	0	0	1	3.21148	0.536164	0.562607	0.26461	0.0541978	0.666667	-1.29153	11.1	1.16865	0.96	7.91629	3.38226	13.2105	0	1	0	2
CAIXANOVA	Argentina	26	0	61	4	57	0	0	0	0	1	4.00345	1.28036	0.249754	-3.86767	0.279269	0.666667	-1.55102	10.6	2.54485	9.18	7.58824	3.38226	13.2105	0	1	0	2
CAIXANOVA	Australia	26	0	18	0	18	0	0	0	0	1	4.23231	0.567562	0.721527	0.26461	0.165512	0	-1.29153	5	-4.71452	2.8	7.30812	3.38226	13.2105	0	1	0	2
CAIXANOVA	Austria	26	0	13	0	13	0	0	0	0	1	3.23123	0.588788	0.518591	0.26461	0.0931028	0.333333	-1.55102	5.2	2.91401	1.8	6.91557	3.38226	13.2105	0	1	0	2
CAIXANOVA	Bangladesh	26	0	2	0	2	0	0	0	0	1	3.93561	2.63734	1.3076	0.26461	0.590559	0.333333	1.27716	4.3	1.15269	5.96	8.15174	3.38226	13.2105	0	1	0	2
CAIXANOVA	Belgium	26	0	38	3	35	0	0	0	0	1	3.13244	0.777357	0.634216	-0.25827	0.130961	0.666667	-1.29153	8.4	6.38874	1.25	7.02031	3.38226	13.2105	0	1	0	2
CAIXANOVA	Brasil	26	0	53	2	51	0	0	0	0	1	3.89327	1.91931	0.602092	-0.25827	0.406583	0.25	-1.55102	9.3	1.70724	2.94	8.27046	3.38226	13.2105	0	1	0	2
CAIXANOVA	Bulgaria	26	0	13	0	13	0	0	0	0	1	3.36942	1.12444	0.190378	0.26461	0.191694	0.5	-0.790003	10.1	8.1765	6.25	6.88874	3.38226	13.2105	0	1	0	2
CAIXANOVA	Canada	26	0	23	1	22	0	0	0	0	1	3.81425	0.103029	0.79255	-0.25827	0.161496	0.166667	-1.29153	6.7	3.0366	2.9	7.50919	3.38226	13.2105	0	1	0	2
CAIXANOVA	Chile	26	0	49	3	46	0	0	0	0	1	4.03132	1.48778	0.490568	-3.86767	0.146208	0.416667	-1.55102	8	5.60687	5.71	7.21206	3.38226	13.2105	0	1	0	2
CAIXANOVA	China	26	0	44	2	42	0	0	0	0	1	3.98191	1.90078	1.11489	0.52605	1.8939	0.333333	1.26844	4.2	3.22686	10.2	9.11544	3.38226	13.2105	0	1	0	2
CAIXANOVA	Colombia	26	0	33	3	30	0	0	0	0	1	3.90663	1.54759	0.748636	-3.86767	0.629637	0.166667	-1.55102	12	8.29023	4.72	7.65269	3.38226	13.2105	0	1	0	2
CAIXANOVA	South Korea	26	0	10	0	10	0	0	0	0	1	4.00439	0.420141	0.172921	0.52605	0.19628	0.541667	-0.271032	3.7	0.900652	4.2	7.68389	3.38226	13.2105	0	1	0	2
CAIXANOVA	Costa Rica	26	0	15	1	14	0	0	0	0	1	3.93278	1.54875	0.662422	-3.86767	0.00206424	0	-1.55102	6.6	3.26941	5.91	6.63621	3.38226	13.2105	0	1	0	2
CAIXANOVA	Croacia	26	0	8	0	8	0	0	0	0	1	3.22565	1.27885	0.253946	0.26461	1.01215	0.666667	-1.55102	12.6	4.3578	4.28	6.64771	3.38226	13.2105	0	1	0	2
CAIXANOVA	Denmark	26	0	10	0	10	0	0	0	0	1	3.31418	0.590138	0.733766	0.26461	0.112828	0.166667	-1.04949	4.8	2.05207	3.05	6.73368	3.38226	13.2105	0	1	0	2
CAIXANOVA	Ecuador	26	0	18	2	16	0	0	0	0	1	3.95347	1.61213	0.825643	-3.38939	0.280888	0.133333	-1.55102	7.7	5.24269	4.74	7.12151	3.38226	13.2105	0	1	0	2
CAIXANOVA	El Salvador	26	0	12	1	11	0	0	0	0	1	3.94102	2.12139	0.718083	-3.86767	0.459103	0.666667	-1.55102	7.2	3.05173	2.75	6.83765	3.38226	13.2105	0	1	0	2
CAIXANOVA	Slovakia	26	0	13	0	13	0	0	0	0	1	3.29809	0.931708	0.0511288	0.26461	0.296655	0.333333	-1.29153	16.2	4.02343	6.04	6.73135	3.38226	13.2105	0	1	0	2
CAIXANOVA	Slovenia	26	0	6	0	6	0	0	0	0	1	3.20355	0.40353	0.182051	0.26461	0.101477	0.333333	-1.29153	6.5	1.4438	4.03	6.30114	3.38226	13.2105	0	1	0	2
CAIXANOVA	USA	26	1	74	7	67	0	0	0	0	1	3.87141	0.553655	1.26073	-0.69195	0.15745	0.166667	-1.29153	5.1	0.800894	3.2	8.47189	3.38226	13.2105	0	1	0	2
CAIXANOVA	Estonia	26	0	3	0	3	0	0	0	0	1	3.46571	0.927963	0.110104	0.26461	0.20986	0.666667	-0.530518	7.9	20.7518	10.47	6.12908	3.38226	13.2105	0	1	0	2
CAIXANOVA	Ethiopia	26	0	2	0	2	0	0	0	0	1	3.72911	2.78128	1.3431	0.26461	1.26883	0.333333	-0.530518	5.4	1.80247	10.2	7.85282	3.38226	13.2105	0	1	0	2
CAIXANOVA	Philippine	26	0	12	1	11	0	0	0	0	1	4.07154	1.53391	0.995918	0.26461	0.359399	0.208333	-1.55102	7.7	1.1508	4.97	7.91936	3.38226	13.2105	0	1	0	2
CAIXANOVA	Finland	26	0	9	0	9	0	0	0	0	1	3.48105	0.507403	0.679478	0.52605	0.114138	0.0833333	-1.04949	8.4	2.36125	2.09	6.71984	3.38226	13.2105	0	1	0	2
CAIXANOVA	France	26	0	80	5	75	0	0	0	0	1	2.98175	0.490732	0.583416	-0.25827	0.0417816	0.333333	-1.29153	8.9	2.98952	1.19	7.78442	3.38226	13.2105	0	1	0	2
CAIXANOVA	Greece	26	0	20	1	19	0	0	0	0	1	3.35976	0.538884	0.215795	0.26461	0.101199	0.166667	-1.04949	9.8	0.269531	3.66	7.04548	3.38226	13.2105	0	1	0	2
CAIXANOVA	The Netherlands	26	0	23	0	23	0	0	0	0	1	3.17633	0.566689	0.663452	0.26461	0.0980731	0	-1.29153	4.7	6.98972	1.13	7.21272	3.38226	13.2105	0	1	0	2
CAIXANOVA	Hungary	26	0	20	1	19	0	0	0	0	1	3.29217	1.2511	0.147629	0.52605	0.00651064	0	-1.29153	7.2	6.0699	4.25	7.00376	3.38226	13.2105	0	1	0	2
CAIXANOVA	India	26	0	18	1	17	0	0	0	0	1	3.88339	2.24326	1.22135	0.26461	0.405146	0.333333	1.26844	4.4	0.818883	9.23	9.03925	3.38226	13.2105	0	1	0	2
CAIXANOVA	Ireland	26	0	19	1	18	0	0	0	0	1	3.18256	0.764228	0.019023	0.26461	0.0741923	0.666667	-1.55102	4.3	-11.284	5.5	6.619	3.38226	13.2105	0	1	0	2
CAIXANOVA	Iceland	26	0	2	0	2	0	0	0	0	1	3.47432	0.957051	0.692716	0.26461	0.110148	0.666667	-1.04949	2.6	14.7276	5.53	5.47239	3.38226	13.2105	0	1	0	2
CAIXANOVA	Israel	26	0	9	0	9	0	0	0	0	1	3.54353	1.46344	0.103381	-0.21367	0.110461	0	1.01767	9	4.52632	5.17	6.84033	3.38226	13.2105	0	1	0	2
CAIXANOVA	Italy	26	0	65	3	62	0	0	0	0	1	3.12249	0.419623	0.297329	-0.25827	0.00573603	0.25	-1.29153	7.7	1.13309	-3.56	7.76795	3.38226	13.2105	0	1	0	2
CAIXANOVA	Japan	26	0	15	2	13	0	0	0	0	1	4.02876	0.661939	0.887715	0.52605	0.0207448	0.416667	1.26844	4.4	0.0612047	2.6	8.10644	3.38226	13.2105	0	1	0	2
CAIXANOVA	Latvia	26	0	3	0	3	0	0	0	0	1	3.43418	0.923385	0.149979	0.26461	0.312954	0.416667	-1.03204	8.9	3.9397	10.6	6.36182	3.38226	13.2105	0	1	0	2
CAIXANOVA	Lithuania	26	0	2	0	2	0	0	0	0	1	3.41598	0.941538	0.270507	0.26461	0.206518	0.25	-1.29153	8.3	3.93337	7.56	6.5333	3.38226	13.2105	0	1	0	2
CAIXANOVA	Luxembourg	26	0	8	1	7	0	0	0	0	1	3.11354	1.69208	0.929135	-0.25827	0.11085	0.166667	-1.55102	4.5	10.1045	4.03	5.65964	3.38226	13.2105	0	1	0	2
CAIXANOVA	Malta	26	0	3	0	3	0	0	0	0	1	3.20679	1.13972	0.366184	0.52605	0.130339	0.333333	-1.55102	7.3	10.5646	2.49	5.60584	3.38226	13.2105	0	1	0	2
CAIXANOVA	Morocco	26	0	40	1	39	0	0	0	0	1	2.94765	2.40856	0.965929	0.52605	1.13327	0.166667	1.27716	11	5.6818	1.72	7.47918	3.38226	13.2105	0	1	0	2
CAIXANOVA	Mexico	26	0	68	5	63	0	0	0	0	1	3.96116	1.61593	0.61242	-3.86767	0.803904	0.333333	-1.55102	3.5	2.35186	2.8	8.01321	3.38226	13.2105	0	1	0	2
CAIXANOVA	Nigeria	26	0	2	0	2	0	0	0	0	1	3.5664	2.38172	1.08093	0.26461	1.74765	0.666667	-0.530518	5.6	3.50758	6.1	8.15031	3.38226	13.2105	0	1	0	2
CAIXANOVA	Norway	26	0	10	0	10	0	0	0	0	1	3.39007	0.558513	0.773884	0.26461	0.110833	0.166667	-1.04949	4.6	1.15494	2.26	6.66495	3.38226	13.2105	0	1	0	2
CAIXANOVA	New Zealand	26	0	2	0	2	0	0	0	0	1	4.2904	0.485975	0.553697	0.26461	0.0975475	0.666667	-0.790003	3.8	1.46672	1.9	6.61267	3.38226	13.2105	0	1	0	2
CAIXANOVA	Panama	26	0	24	3	21	0	0	0	0	1	3.91924	1.43673	0.720964	-3.38939	0.445543	0.666667	-1.29153	9.8	4.37245	6.91	6.5094	3.38226	13.2105	0	1	0	2
CAIXANOVA	Peru	26	0	33	3	30	0	0	0	0	1	3.97657	1.42631	0.798443	-3.38939	0.983327	0.666667	-1.55102	5.2	3.2493	6.45	7.44667	3.38226	13.2105	0	1	0	2
CAIXANOVA	Poland	26	0	53	3	50	0	0	0	0	1	3.33558	1.19959	0.38872	0.26461	0.0799061	0.25	-1.29153	17.7	2.54782	3.55	7.58167	3.38226	13.2105	0	1	0	2
CAIXANOVA	Portugal	26	1	102	10	92	0	0	0	0	1	2.8324	0.769779	0.315828	-0.25827	0.0980653	0.166667	-1.29153	7.6	1.69826	0.37	7.02323	3.38226	13.2105	0	1	0	2
CAIXANOVA	UK	26	0	68	4	64	0	0	0	0	1	3.15698	0.805554	0.679132	0.26461	0.00306242	0.5	-0.790003	4.7	7.47323	1.82	7.77979	3.38226	13.2105	0	1	0	2
CAIXANOVA	Czech Republic	26	0	28	1	27	0	0	0	0	1	3.26204	0.685613	0.00167352	0.26461	0.00949857	0.666667	-1.03204	7.9	8.86508	6.08	7.01005	3.38226	13.2105	0	1	0	2
CAIXANOVA	Romania	26	0	20	1	19	0	0	0	0	1	3.37913	1.01845	0.52496	-0.25827	0.348609	0.5	-0.790003	7.2	6.46266	4.1	7.33514	3.38226	13.2105	0	1	0	2
CAIXANOVA	Rusia	26	0	24	1	23	0	0	0	0	1	3.62123	0.696054	0.111071	0.26461	0.792843	0.666667	-0.790003	7.1	1.90974	6.4	8.15568	3.38226	13.2105	0	1	0	2
CAIXANOVA	Serbia	26	0	7	0	7	0	0	0	0	1	3.30011	1.33787	0.652569	0.26461	1.71416	0.333333	-0.790003	20.8	5.64939	4.68	6.90656	3.38226	13.2105	0	1	0	2
CAIXANOVA	Singapur	26	0	13	1	12	0	0	0	0	1	4.05448	1.4349	0.479333	0.26461	1.00484	0.666667	1.00895	4.1	17.2101	6.62	6.63767	3.38226	13.2105	0	1	0	2
CAIXANOVA	South Africa	26	0	14	0	14	0	0	0	0	1	3.91822	1.72008	0.6954	0.26461	0.167296	0	-0.790003	23.8	2.63118	5.1	7.67106	3.38226	13.2105	0	1	0	2
CAIXANOVA	Sweden	26	0	15	0	15	0	0	0	0	1	3.3956	0.90496	0.81257	0.26461	0.108496	0	-0.790003	7.7	3.74326	2.7	6.9554	3.38226	13.2105	0	1	0	2
CAIXANOVA	Switzerland	26	0	18	2	16	0	0	0	0	1	3.91415	0.836495	0.694867	-0.21367	0.150978	0.166667	-1.55102	4.4	1.57889	1.9	6.8714	3.38226	13.2105	0	1	0	2
CAIXANOVA	Thailand	26	0	14	0	14	0	0	0	0	1	4.00637	1.44759	1.08846	0.52605	0.353899	0.666667	1.26844	1.3	2.09225	4.49	7.80776	3.38226	13.2105	0	1	0	2
CAIXANOVA	Turquia	26	0	18	1	17	0	0	0	0	1	3.47222	1.60088	0.7561	0.52605	0.628774	0.666667	1.27716	10.6	2.66423	7.38	7.85772	3.38226	13.2105	0	1	0	2
CAIXANOVA	Uruguay	26	0	23	3	20	0	0	0	0	1	3.99607	1.1487	0.233146	-3.86767	0.14597	0.666667	-1.29153	12.2	3.61146	6.56	6.51927	3.38226	13.2105	0	1	0	2
CAIXANOVA	Venezuela	26	0	31	3	28	0	0	0	0	1	3.8557	1.76796	0.336214	-3.86767	0.309872	0.166667	-1.55102	11.4	2.04181	10.33	7.42451	3.38226	13.2105	0	1	0	2
CAJA BADAJOZ	Germany	27	0	56	2	54	0	0	0	0	1	3.21148	0.536164	0.562607	0.26461	0.0541978	0.666667	-1.29153	11.1	1.16865	0.96	7.91629	2.91045	10.7897	0	1	0	1
CAJA BADAJOZ	Argentina	27	0	61	4	57	0	0	0	0	1	4.00345	1.28036	0.249754	-3.86767	0.279269	0.666667	-1.55102	10.6	2.54485	9.18	7.58824	2.91045	10.7897	0	1	0	1
CAJA BADAJOZ	Australia	27	0	18	0	18	0	0	0	0	1	4.23231	0.567562	0.721527	0.26461	0.165512	0	-1.29153	5	-4.71452	2.8	7.30812	2.91045	10.7897	0	1	0	1
CAJA BADAJOZ	Austria	27	0	13	0	13	0	0	0	0	1	3.23123	0.588788	0.518591	0.26461	0.0931028	0.333333	-1.55102	5.2	2.91401	1.8	6.91557	2.91045	10.7897	0	1	0	1
CAJA BADAJOZ	Bangladesh	27	0	2	0	2	0	0	0	0	1	3.93561	2.63734	1.3076	0.26461	0.590559	0.333333	1.27716	4.3	1.15269	5.96	8.15174	2.91045	10.7897	0	1	0	1
CAJA BADAJOZ	Belgium	27	0	38	3	35	0	0	0	0	1	3.13244	0.777357	0.634216	-0.25827	0.130961	0.666667	-1.29153	8.4	6.38874	1.25	7.02031	2.91045	10.7897	0	1	0	1
CAJA BADAJOZ	Brasil	27	0	53	2	51	0	0	0	0	1	3.89327	1.91931	0.602092	-0.25827	0.406583	0.25	-1.55102	9.3	1.70724	2.94	8.27046	2.91045	10.7897	0	1	0	1
CAJA BADAJOZ	Bulgaria	27	0	13	0	13	0	0	0	0	1	3.36942	1.12444	0.190378	0.26461	0.191694	0.5	-0.790003	10.1	8.1765	6.25	6.88874	2.91045	10.7897	0	1	0	1
CAJA BADAJOZ	Canada	27	0	23	1	22	0	0	0	0	1	3.81425	0.103029	0.79255	-0.25827	0.161496	0.166667	-1.29153	6.7	3.0366	2.9	7.50919	2.91045	10.7897	0	1	0	1
CAJA BADAJOZ	Chile	27	0	49	3	46	0	0	0	0	1	4.03132	1.48778	0.490568	-3.86767	0.146208	0.416667	-1.55102	8	5.60687	5.71	7.21206	2.91045	10.7897	0	1	0	1
CAJA BADAJOZ	China	27	0	44	2	42	0	0	0	0	1	3.98191	1.90078	1.11489	0.52605	1.8939	0.333333	1.26844	4.2	3.22686	10.2	9.11544	2.91045	10.7897	0	1	0	1
CAJA BADAJOZ	Colombia	27	0	33	3	30	0	0	0	0	1	3.90663	1.54759	0.748636	-3.86767	0.629637	0.166667	-1.55102	12	8.29023	4.72	7.65269	2.91045	10.7897	0	1	0	1
CAJA BADAJOZ	South Korea	27	0	10	0	10	0	0	0	0	1	4.00439	0.420141	0.172921	0.52605	0.19628	0.541667	-0.271032	3.7	0.900652	4.2	7.68389	2.91045	10.7897	0	1	0	1
CAJA BADAJOZ	Costa Rica	27	0	15	1	14	0	0	0	0	1	3.93278	1.54875	0.662422	-3.86767	0.00206424	0	-1.55102	6.6	3.26941	5.91	6.63621	2.91045	10.7897	0	1	0	1
CAJA BADAJOZ	Croacia	27	0	8	0	8	0	0	0	0	1	3.22565	1.27885	0.253946	0.26461	1.01215	0.666667	-1.55102	12.6	4.3578	4.28	6.64771	2.91045	10.7897	0	1	0	1
CAJA BADAJOZ	Denmark	27	0	10	0	10	0	0	0	0	1	3.31418	0.590138	0.733766	0.26461	0.112828	0.166667	-1.04949	4.8	2.05207	3.05	6.73368	2.91045	10.7897	0	1	0	1
CAJA BADAJOZ	Ecuador	27	0	18	2	16	0	0	0	0	1	3.95347	1.61213	0.825643	-3.38939	0.280888	0.133333	-1.55102	7.7	5.24269	4.74	7.12151	2.91045	10.7897	0	1	0	1
CAJA BADAJOZ	El Salvador	27	0	12	1	11	0	0	0	0	1	3.94102	2.12139	0.718083	-3.86767	0.459103	0.666667	-1.55102	7.2	3.05173	2.75	6.83765	2.91045	10.7897	0	1	0	1
CAJA BADAJOZ	Slovakia	27	0	13	0	13	0	0	0	0	1	3.29809	0.931708	0.0511288	0.26461	0.296655	0.333333	-1.29153	16.2	4.02343	6.04	6.73135	2.91045	10.7897	0	1	0	1
CAJA BADAJOZ	Slovenia	27	0	6	0	6	0	0	0	0	1	3.20355	0.40353	0.182051	0.26461	0.101477	0.333333	-1.29153	6.5	1.4438	4.03	6.30114	2.91045	10.7897	0	1	0	1
CAJA BADAJOZ	USA	27	0	74	7	67	0	0	0	0	1	3.87141	0.553655	1.26073	-0.69195	0.15745	0.166667	-1.29153	5.1	0.800894	3.2	8.47189	2.91045	10.7897	0	1	0	1
CAJA BADAJOZ	Estonia	27	0	3	0	3	0	0	0	0	1	3.46571	0.927963	0.110104	0.26461	0.20986	0.666667	-0.530518	7.9	20.7518	10.47	6.12908	2.91045	10.7897	0	1	0	1
CAJA BADAJOZ	Ethiopia	27	0	2	0	2	0	0	0	0	1	3.72911	2.78128	1.3431	0.26461	1.26883	0.333333	-0.530518	5.4	1.80247	10.2	7.85282	2.91045	10.7897	0	1	0	1
CAJA BADAJOZ	Philippine	27	0	12	1	11	0	0	0	0	1	4.07154	1.53391	0.995918	0.26461	0.359399	0.208333	-1.55102	7.7	1.1508	4.97	7.91936	2.91045	10.7897	0	1	0	1
CAJA BADAJOZ	Finland	27	0	9	0	9	0	0	0	0	1	3.48105	0.507403	0.679478	0.52605	0.114138	0.0833333	-1.04949	8.4	2.36125	2.09	6.71984	2.91045	10.7897	0	1	0	1
CAJA BADAJOZ	France	27	0	80	5	75	0	0	0	0	1	2.98175	0.490732	0.583416	-0.25827	0.0417816	0.333333	-1.29153	8.9	2.98952	1.19	7.78442	2.91045	10.7897	0	1	0	1
CAJA BADAJOZ	Greece	27	0	20	1	19	0	0	0	0	1	3.35976	0.538884	0.215795	0.26461	0.101199	0.166667	-1.04949	9.8	0.269531	3.66	7.04548	2.91045	10.7897	0	1	0	1
CAJA BADAJOZ	The Netherlands	27	0	23	0	23	0	0	0	0	1	3.17633	0.566689	0.663452	0.26461	0.0980731	0	-1.29153	4.7	6.98972	1.13	7.21272	2.91045	10.7897	0	1	0	1
CAJA BADAJOZ	Hungary	27	0	20	1	19	0	0	0	0	1	3.29217	1.2511	0.147629	0.52605	0.00651064	0	-1.29153	7.2	6.0699	4.25	7.00376	2.91045	10.7897	0	1	0	1
CAJA BADAJOZ	India	27	0	18	1	17	0	0	0	0	1	3.88339	2.24326	1.22135	0.26461	0.405146	0.333333	1.26844	4.4	0.818883	9.23	9.03925	2.91045	10.7897	0	1	0	1
CAJA BADAJOZ	Ireland	27	0	19	1	18	0	0	0	0	1	3.18256	0.764228	0.019023	0.26461	0.0741923	0.666667	-1.55102	4.3	-11.284	5.5	6.619	2.91045	10.7897	0	1	0	1
CAJA BADAJOZ	Iceland	27	0	2	0	2	0	0	0	0	1	3.47432	0.957051	0.692716	0.26461	0.110148	0.666667	-1.04949	2.6	14.7276	5.53	5.47239	2.91045	10.7897	0	1	0	1
CAJA BADAJOZ	Israel	27	0	9	0	9	0	0	0	0	1	3.54353	1.46344	0.103381	-0.21367	0.110461	0	1.01767	9	4.52632	5.17	6.84033	2.91045	10.7897	0	1	0	1
CAJA BADAJOZ	Italy	27	0	65	3	62	0	0	0	0	1	3.12249	0.419623	0.297329	-0.25827	0.00573603	0.25	-1.29153	7.7	1.13309	-3.56	7.76795	2.91045	10.7897	0	1	0	1
CAJA BADAJOZ	Japan	27	0	15	2	13	0	0	0	0	1	4.02876	0.661939	0.887715	0.52605	0.0207448	0.416667	1.26844	4.4	0.0612047	2.6	8.10644	2.91045	10.7897	0	1	0	1
CAJA BADAJOZ	Latvia	27	0	3	0	3	0	0	0	0	1	3.43418	0.923385	0.149979	0.26461	0.312954	0.416667	-1.03204	8.9	3.9397	10.6	6.36182	2.91045	10.7897	0	1	0	1
CAJA BADAJOZ	Lithuania	27	0	2	0	2	0	0	0	0	1	3.41598	0.941538	0.270507	0.26461	0.206518	0.25	-1.29153	8.3	3.93337	7.56	6.5333	2.91045	10.7897	0	1	0	1
CAJA BADAJOZ	Luxembourg	27	0	8	1	7	0	0	0	0	1	3.11354	1.69208	0.929135	-0.25827	0.11085	0.166667	-1.55102	4.5	10.1045	4.03	5.65964	2.91045	10.7897	0	1	0	1
CAJA BADAJOZ	Malta	27	0	3	0	3	0	0	0	0	1	3.20679	1.13972	0.366184	0.52605	0.130339	0.333333	-1.55102	7.3	10.5646	2.49	5.60584	2.91045	10.7897	0	1	0	1
CAJA BADAJOZ	Morocco	27	0	40	1	39	0	0	0	0	1	2.94765	2.40856	0.965929	0.52605	1.13327	0.166667	1.27716	11	5.6818	1.72	7.47918	2.91045	10.7897	0	1	0	1
CAJA BADAJOZ	Mexico	27	0	68	5	63	0	0	0	0	1	3.96116	1.61593	0.61242	-3.86767	0.803904	0.333333	-1.55102	3.5	2.35186	2.8	8.01321	2.91045	10.7897	0	1	0	1
CAJA BADAJOZ	Nigeria	27	0	2	0	2	0	0	0	0	1	3.5664	2.38172	1.08093	0.26461	1.74765	0.666667	-0.530518	5.6	3.50758	6.1	8.15031	2.91045	10.7897	0	1	0	1
CAJA BADAJOZ	Norway	27	0	10	0	10	0	0	0	0	1	3.39007	0.558513	0.773884	0.26461	0.110833	0.166667	-1.04949	4.6	1.15494	2.26	6.66495	2.91045	10.7897	0	1	0	1
CAJA BADAJOZ	New Zealand	27	0	2	0	2	0	0	0	0	1	4.2904	0.485975	0.553697	0.26461	0.0975475	0.666667	-0.790003	3.8	1.46672	1.9	6.61267	2.91045	10.7897	0	1	0	1
CAJA BADAJOZ	Panama	27	0	24	3	21	0	0	0	0	1	3.91924	1.43673	0.720964	-3.38939	0.445543	0.666667	-1.29153	9.8	4.37245	6.91	6.5094	2.91045	10.7897	0	1	0	1
CAJA BADAJOZ	Peru	27	0	33	3	30	0	0	0	0	1	3.97657	1.42631	0.798443	-3.38939	0.983327	0.666667	-1.55102	5.2	3.2493	6.45	7.44667	2.91045	10.7897	0	1	0	1
CAJA BADAJOZ	Poland	27	0	53	3	50	0	0	0	0	1	3.33558	1.19959	0.38872	0.26461	0.0799061	0.25	-1.29153	17.7	2.54782	3.55	7.58167	2.91045	10.7897	0	1	0	1
CAJA BADAJOZ	Portugal	27	1	102	10	92	0	0	0	0	1	2.8324	0.769779	0.315828	-0.25827	0.0980653	0.166667	-1.29153	7.6	1.69826	0.37	7.02323	2.91045	10.7897	0	1	0	1
CAJA BADAJOZ	UK	27	0	68	4	64	0	0	0	0	1	3.15698	0.805554	0.679132	0.26461	0.00306242	0.5	-0.790003	4.7	7.47323	1.82	7.77979	2.91045	10.7897	0	1	0	1
CAJA BADAJOZ	Czech Republic	27	0	28	1	27	0	0	0	0	1	3.26204	0.685613	0.00167352	0.26461	0.00949857	0.666667	-1.03204	7.9	8.86508	6.08	7.01005	2.91045	10.7897	0	1	0	1
CAJA BADAJOZ	Romania	27	0	20	1	19	0	0	0	0	1	3.37913	1.01845	0.52496	-0.25827	0.348609	0.5	-0.790003	7.2	6.46266	4.1	7.33514	2.91045	10.7897	0	1	0	1
CAJA BADAJOZ	Rusia	27	0	24	1	23	0	0	0	0	1	3.62123	0.696054	0.111071	0.26461	0.792843	0.666667	-0.790003	7.1	1.90974	6.4	8.15568	2.91045	10.7897	0	1	0	1
CAJA BADAJOZ	Serbia	27	0	7	0	7	0	0	0	0	1	3.30011	1.33787	0.652569	0.26461	1.71416	0.333333	-0.790003	20.8	5.64939	4.68	6.90656	2.91045	10.7897	0	1	0	1
CAJA BADAJOZ	Singapur	27	0	13	1	12	0	0	0	0	1	4.05448	1.4349	0.479333	0.26461	1.00484	0.666667	1.00895	4.1	17.2101	6.62	6.63767	2.91045	10.7897	0	1	0	1
CAJA BADAJOZ	South Africa	27	0	14	0	14	0	0	0	0	1	3.91822	1.72008	0.6954	0.26461	0.167296	0	-0.790003	23.8	2.63118	5.1	7.67106	2.91045	10.7897	0	1	0	1
CAJA BADAJOZ	Sweden	27	0	15	0	15	0	0	0	0	1	3.3956	0.90496	0.81257	0.26461	0.108496	0	-0.790003	7.7	3.74326	2.7	6.9554	2.91045	10.7897	0	1	0	1
CAJA BADAJOZ	Switzerland	27	0	18	2	16	0	0	0	0	1	3.91415	0.836495	0.694867	-0.21367	0.150978	0.166667	-1.55102	4.4	1.57889	1.9	6.8714	2.91045	10.7897	0	1	0	1
CAJA BADAJOZ	Thailand	27	0	14	0	14	0	0	0	0	1	4.00637	1.44759	1.08846	0.52605	0.353899	0.666667	1.26844	1.3	2.09225	4.49	7.80776	2.91045	10.7897	0	1	0	1
CAJA BADAJOZ	Turquia	27	0	18	1	17	0	0	0	0	1	3.47222	1.60088	0.7561	0.52605	0.628774	0.666667	1.27716	10.6	2.66423	7.38	7.85772	2.91045	10.7897	0	1	0	1
CAJA BADAJOZ	Uruguay	27	0	23	3	20	0	0	0	0	1	3.99607	1.1487	0.233146	-3.86767	0.14597	0.666667	-1.29153	12.2	3.61146	6.56	6.51927	2.91045	10.7897	0	1	0	1
CAJA BADAJOZ	Venezuela	27	0	31	3	28	0	0	0	0	1	3.8557	1.76796	0.336214	-3.86767	0.309872	0.166667	-1.55102	11.4	2.04181	10.33	7.42451	2.91045	10.7897	0	1	0	1
CAJA DE AHORROS DE ASTURIAS	Germany	28	0	56	2	54	0	0	0	0	1	3.21148	0.536164	0.562607	0.26461	0.0541978	0.666667	-1.29153	11.1	1.16865	0.96	7.91629	3.14829	15.483	0	1	0	3
CAJA DE AHORROS DE ASTURIAS	Argentina	28	1	61	4	57	0	0	0	0	1	4.00345	1.28036	0.249754	-3.86767	0.279269	0.666667	-1.55102	10.6	2.54485	9.18	7.58824	3.14829	15.483	0	1	0	3
CAJA DE AHORROS DE ASTURIAS	Australia	28	0	18	0	18	0	0	0	0	1	4.23231	0.567562	0.721527	0.26461	0.165512	0	-1.29153	5	-4.71452	2.8	7.30812	3.14829	15.483	0	1	0	3
CAJA DE AHORROS DE ASTURIAS	Austria	28	0	13	0	13	0	0	0	0	1	3.23123	0.588788	0.518591	0.26461	0.0931028	0.333333	-1.55102	5.2	2.91401	1.8	6.91557	3.14829	15.483	0	1	0	3
CAJA DE AHORROS DE ASTURIAS	Bangladesh	28	0	2	0	2	0	0	0	0	1	3.93561	2.63734	1.3076	0.26461	0.590559	0.333333	1.27716	4.3	1.15269	5.96	8.15174	3.14829	15.483	0	1	0	3
CAJA DE AHORROS DE ASTURIAS	Belgium	28	0	38	3	35	0	0	0	0	1	3.13244	0.777357	0.634216	-0.25827	0.130961	0.666667	-1.29153	8.4	6.38874	1.25	7.02031	3.14829	15.483	0	1	0	3
CAJA DE AHORROS DE ASTURIAS	Brasil	28	0	53	2	51	0	0	0	0	1	3.89327	1.91931	0.602092	-0.25827	0.406583	0.25	-1.55102	9.3	1.70724	2.94	8.27046	3.14829	15.483	0	1	0	3
CAJA DE AHORROS DE ASTURIAS	Bulgaria	28	0	13	0	13	0	0	0	0	1	3.36942	1.12444	0.190378	0.26461	0.191694	0.5	-0.790003	10.1	8.1765	6.25	6.88874	3.14829	15.483	0	1	0	3
CAJA DE AHORROS DE ASTURIAS	Canada	28	0	23	1	22	0	0	0	0	1	3.81425	0.103029	0.79255	-0.25827	0.161496	0.166667	-1.29153	6.7	3.0366	2.9	7.50919	3.14829	15.483	0	1	0	3
CAJA DE AHORROS DE ASTURIAS	Chile	28	0	49	3	46	0	0	0	0	1	4.03132	1.48778	0.490568	-3.86767	0.146208	0.416667	-1.55102	8	5.60687	5.71	7.21206	3.14829	15.483	0	1	0	3
CAJA DE AHORROS DE ASTURIAS	China	28	0	44	2	42	0	0	0	0	1	3.98191	1.90078	1.11489	0.52605	1.8939	0.333333	1.26844	4.2	3.22686	10.2	9.11544	3.14829	15.483	0	1	0	3
CAJA DE AHORROS DE ASTURIAS	Colombia	28	0	33	3	30	0	0	0	0	1	3.90663	1.54759	0.748636	-3.86767	0.629637	0.166667	-1.55102	12	8.29023	4.72	7.65269	3.14829	15.483	0	1	0	3
CAJA DE AHORROS DE ASTURIAS	South Korea	28	0	10	0	10	0	0	0	0	1	4.00439	0.420141	0.172921	0.52605	0.19628	0.541667	-0.271032	3.7	0.900652	4.2	7.68389	3.14829	15.483	0	1	0	3
CAJA DE AHORROS DE ASTURIAS	Costa Rica	28	0	15	1	14	0	0	0	0	1	3.93278	1.54875	0.662422	-3.86767	0.00206424	0	-1.55102	6.6	3.26941	5.91	6.63621	3.14829	15.483	0	1	0	3
CAJA DE AHORROS DE ASTURIAS	Croacia	28	0	8	0	8	0	0	0	0	1	3.22565	1.27885	0.253946	0.26461	1.01215	0.666667	-1.55102	12.6	4.3578	4.28	6.64771	3.14829	15.483	0	1	0	3
CAJA DE AHORROS DE ASTURIAS	Denmark	28	0	10	0	10	0	0	0	0	1	3.31418	0.590138	0.733766	0.26461	0.112828	0.166667	-1.04949	4.8	2.05207	3.05	6.73368	3.14829	15.483	0	1	0	3
CAJA DE AHORROS DE ASTURIAS	Ecuador	28	0	18	2	16	0	0	0	0	1	3.95347	1.61213	0.825643	-3.38939	0.280888	0.133333	-1.55102	7.7	5.24269	4.74	7.12151	3.14829	15.483	0	1	0	3
CAJA DE AHORROS DE ASTURIAS	El Salvador	28	0	12	1	11	0	0	0	0	1	3.94102	2.12139	0.718083	-3.86767	0.459103	0.666667	-1.55102	7.2	3.05173	2.75	6.83765	3.14829	15.483	0	1	0	3
CAJA DE AHORROS DE ASTURIAS	Slovakia	28	0	13	0	13	0	0	0	0	1	3.29809	0.931708	0.0511288	0.26461	0.296655	0.333333	-1.29153	16.2	4.02343	6.04	6.73135	3.14829	15.483	0	1	0	3
CAJA DE AHORROS DE ASTURIAS	Slovenia	28	0	6	0	6	0	0	0	0	1	3.20355	0.40353	0.182051	0.26461	0.101477	0.333333	-1.29153	6.5	1.4438	4.03	6.30114	3.14829	15.483	0	1	0	3
CAJA DE AHORROS DE ASTURIAS	USA	28	0	74	7	67	0	0	0	0	1	3.87141	0.553655	1.26073	-0.69195	0.15745	0.166667	-1.29153	5.1	0.800894	3.2	8.47189	3.14829	15.483	0	1	0	3
CAJA DE AHORROS DE ASTURIAS	Estonia	28	0	3	0	3	0	0	0	0	1	3.46571	0.927963	0.110104	0.26461	0.20986	0.666667	-0.530518	7.9	20.7518	10.47	6.12908	3.14829	15.483	0	1	0	3
CAJA DE AHORROS DE ASTURIAS	Ethiopia	28	0	2	0	2	0	0	0	0	1	3.72911	2.78128	1.3431	0.26461	1.26883	0.333333	-0.530518	5.4	1.80247	10.2	7.85282	3.14829	15.483	0	1	0	3
CAJA DE AHORROS DE ASTURIAS	Philippine	28	0	12	1	11	0	0	0	0	1	4.07154	1.53391	0.995918	0.26461	0.359399	0.208333	-1.55102	7.7	1.1508	4.97	7.91936	3.14829	15.483	0	1	0	3
CAJA DE AHORROS DE ASTURIAS	Finland	28	0	9	0	9	0	0	0	0	1	3.48105	0.507403	0.679478	0.52605	0.114138	0.0833333	-1.04949	8.4	2.36125	2.09	6.71984	3.14829	15.483	0	1	0	3
CAJA DE AHORROS DE ASTURIAS	France	28	0	80	5	75	0	0	0	0	1	2.98175	0.490732	0.583416	-0.25827	0.0417816	0.333333	-1.29153	8.9	2.98952	1.19	7.78442	3.14829	15.483	0	1	0	3
CAJA DE AHORROS DE ASTURIAS	Greece	28	0	20	1	19	0	0	0	0	1	3.35976	0.538884	0.215795	0.26461	0.101199	0.166667	-1.04949	9.8	0.269531	3.66	7.04548	3.14829	15.483	0	1	0	3
CAJA DE AHORROS DE ASTURIAS	The Netherlands	28	0	23	0	23	0	0	0	0	1	3.17633	0.566689	0.663452	0.26461	0.0980731	0	-1.29153	4.7	6.98972	1.13	7.21272	3.14829	15.483	0	1	0	3
CAJA DE AHORROS DE ASTURIAS	Hungary	28	0	20	1	19	0	0	0	0	1	3.29217	1.2511	0.147629	0.52605	0.00651064	0	-1.29153	7.2	6.0699	4.25	7.00376	3.14829	15.483	0	1	0	3
CAJA DE AHORROS DE ASTURIAS	India	28	0	18	1	17	0	0	0	0	1	3.88339	2.24326	1.22135	0.26461	0.405146	0.333333	1.26844	4.4	0.818883	9.23	9.03925	3.14829	15.483	0	1	0	3
CAJA DE AHORROS DE ASTURIAS	Ireland	28	0	19	1	18	0	0	0	0	1	3.18256	0.764228	0.019023	0.26461	0.0741923	0.666667	-1.55102	4.3	-11.284	5.5	6.619	3.14829	15.483	0	1	0	3
CAJA DE AHORROS DE ASTURIAS	Iceland	28	0	2	0	2	0	0	0	0	1	3.47432	0.957051	0.692716	0.26461	0.110148	0.666667	-1.04949	2.6	14.7276	5.53	5.47239	3.14829	15.483	0	1	0	3
CAJA DE AHORROS DE ASTURIAS	Israel	28	0	9	0	9	0	0	0	0	1	3.54353	1.46344	0.103381	-0.21367	0.110461	0	1.01767	9	4.52632	5.17	6.84033	3.14829	15.483	0	1	0	3
CAJA DE AHORROS DE ASTURIAS	Italy	28	0	65	3	62	0	0	0	0	1	3.12249	0.419623	0.297329	-0.25827	0.00573603	0.25	-1.29153	7.7	1.13309	-3.56	7.76795	3.14829	15.483	0	1	0	3
CAJA DE AHORROS DE ASTURIAS	Japan	28	0	15	2	13	0	0	0	0	1	4.02876	0.661939	0.887715	0.52605	0.0207448	0.416667	1.26844	4.4	0.0612047	2.6	8.10644	3.14829	15.483	0	1	0	3
CAJA DE AHORROS DE ASTURIAS	Latvia	28	0	3	0	3	0	0	0	0	1	3.43418	0.923385	0.149979	0.26461	0.312954	0.416667	-1.03204	8.9	3.9397	10.6	6.36182	3.14829	15.483	0	1	0	3
CAJA DE AHORROS DE ASTURIAS	Lithuania	28	0	2	0	2	0	0	0	0	1	3.41598	0.941538	0.270507	0.26461	0.206518	0.25	-1.29153	8.3	3.93337	7.56	6.5333	3.14829	15.483	0	1	0	3
CAJA DE AHORROS DE ASTURIAS	Luxembourg	28	0	8	1	7	0	0	0	0	1	3.11354	1.69208	0.929135	-0.25827	0.11085	0.166667	-1.55102	4.5	10.1045	4.03	5.65964	3.14829	15.483	0	1	0	3
CAJA DE AHORROS DE ASTURIAS	Malta	28	0	3	0	3	0	0	0	0	1	3.20679	1.13972	0.366184	0.52605	0.130339	0.333333	-1.55102	7.3	10.5646	2.49	5.60584	3.14829	15.483	0	1	0	3
CAJA DE AHORROS DE ASTURIAS	Morocco	28	0	40	1	39	0	0	0	0	1	2.94765	2.40856	0.965929	0.52605	1.13327	0.166667	1.27716	11	5.6818	1.72	7.47918	3.14829	15.483	0	1	0	3
CAJA DE AHORROS DE ASTURIAS	Mexico	28	1	68	5	63	0	0	0	0	1	3.96116	1.61593	0.61242	-3.86767	0.803904	0.333333	-1.55102	3.5	2.35186	2.8	8.01321	3.14829	15.483	0	1	0	3
CAJA DE AHORROS DE ASTURIAS	Nigeria	28	0	2	0	2	0	0	0	0	1	3.5664	2.38172	1.08093	0.26461	1.74765	0.666667	-0.530518	5.6	3.50758	6.1	8.15031	3.14829	15.483	0	1	0	3
CAJA DE AHORROS DE ASTURIAS	Norway	28	0	10	0	10	0	0	0	0	1	3.39007	0.558513	0.773884	0.26461	0.110833	0.166667	-1.04949	4.6	1.15494	2.26	6.66495	3.14829	15.483	0	1	0	3
CAJA DE AHORROS DE ASTURIAS	New Zealand	28	0	2	0	2	0	0	0	0	1	4.2904	0.485975	0.553697	0.26461	0.0975475	0.666667	-0.790003	3.8	1.46672	1.9	6.61267	3.14829	15.483	0	1	0	3
CAJA DE AHORROS DE ASTURIAS	Panama	28	0	24	3	21	0	0	0	0	1	3.91924	1.43673	0.720964	-3.38939	0.445543	0.666667	-1.29153	9.8	4.37245	6.91	6.5094	3.14829	15.483	0	1	0	3
CAJA DE AHORROS DE ASTURIAS	Peru	28	0	33	3	30	0	0	0	0	1	3.97657	1.42631	0.798443	-3.38939	0.983327	0.666667	-1.55102	5.2	3.2493	6.45	7.44667	3.14829	15.483	0	1	0	3
CAJA DE AHORROS DE ASTURIAS	Poland	28	0	53	3	50	0	0	0	0	1	3.33558	1.19959	0.38872	0.26461	0.0799061	0.25	-1.29153	17.7	2.54782	3.55	7.58167	3.14829	15.483	0	1	0	3
CAJA DE AHORROS DE ASTURIAS	Portugal	28	0	102	10	92	0	0	0	0	1	2.8324	0.769779	0.315828	-0.25827	0.0980653	0.166667	-1.29153	7.6	1.69826	0.37	7.02323	3.14829	15.483	0	1	0	3
CAJA DE AHORROS DE ASTURIAS	UK	28	0	68	4	64	0	0	0	0	1	3.15698	0.805554	0.679132	0.26461	0.00306242	0.5	-0.790003	4.7	7.47323	1.82	7.77979	3.14829	15.483	0	1	0	3
CAJA DE AHORROS DE ASTURIAS	Czech Republic	28	0	28	1	27	0	0	0	0	1	3.26204	0.685613	0.00167352	0.26461	0.00949857	0.666667	-1.03204	7.9	8.86508	6.08	7.01005	3.14829	15.483	0	1	0	3
CAJA DE AHORROS DE ASTURIAS	Romania	28	0	20	1	19	0	0	0	0	1	3.37913	1.01845	0.52496	-0.25827	0.348609	0.5	-0.790003	7.2	6.46266	4.1	7.33514	3.14829	15.483	0	1	0	3
CAJA DE AHORROS DE ASTURIAS	Rusia	28	0	24	1	23	0	0	0	0	1	3.62123	0.696054	0.111071	0.26461	0.792843	0.666667	-0.790003	7.1	1.90974	6.4	8.15568	3.14829	15.483	0	1	0	3
CAJA DE AHORROS DE ASTURIAS	Serbia	28	0	7	0	7	0	0	0	0	1	3.30011	1.33787	0.652569	0.26461	1.71416	0.333333	-0.790003	20.8	5.64939	4.68	6.90656	3.14829	15.483	0	1	0	3
CAJA DE AHORROS DE ASTURIAS	Singapur	28	0	13	1	12	0	0	0	0	1	4.05448	1.4349	0.479333	0.26461	1.00484	0.666667	1.00895	4.1	17.2101	6.62	6.63767	3.14829	15.483	0	1	0	3
CAJA DE AHORROS DE ASTURIAS	South Africa	28	0	14	0	14	0	0	0	0	1	3.91822	1.72008	0.6954	0.26461	0.167296	0	-0.790003	23.8	2.63118	5.1	7.67106	3.14829	15.483	0	1	0	3
CAJA DE AHORROS DE ASTURIAS	Sweden	28	0	15	0	15	0	0	0	0	1	3.3956	0.90496	0.81257	0.26461	0.108496	0	-0.790003	7.7	3.74326	2.7	6.9554	3.14829	15.483	0	1	0	3
CAJA DE AHORROS DE ASTURIAS	Switzerland	28	0	18	2	16	0	0	0	0	1	3.91415	0.836495	0.694867	-0.21367	0.150978	0.166667	-1.55102	4.4	1.57889	1.9	6.8714	3.14829	15.483	0	1	0	3
CAJA DE AHORROS DE ASTURIAS	Thailand	28	0	14	0	14	0	0	0	0	1	4.00637	1.44759	1.08846	0.52605	0.353899	0.666667	1.26844	1.3	2.09225	4.49	7.80776	3.14829	15.483	0	1	0	3
CAJA DE AHORROS DE ASTURIAS	Turquia	28	0	18	1	17	0	0	0	0	1	3.47222	1.60088	0.7561	0.52605	0.628774	0.666667	1.27716	10.6	2.66423	7.38	7.85772	3.14829	15.483	0	1	0	3
CAJA DE AHORROS DE ASTURIAS	Uruguay	28	0	23	3	20	0	0	0	0	1	3.99607	1.1487	0.233146	-3.86767	0.14597	0.666667	-1.29153	12.2	3.61146	6.56	6.51927	3.14829	15.483	0	1	0	3
CAJA DE AHORROS DE ASTURIAS	Venezuela	28	0	31	3	28	0	0	0	0	1	3.8557	1.76796	0.336214	-3.86767	0.309872	0.166667	-1.55102	11.4	2.04181	10.33	7.42451	3.14829	15.483	0	1	0	3
CAJA DE AHORROS DE SALAMANCA Y SORIA	Germany	29	0	56	2	54	0	0	0	0	1	3.21148	0.536164	0.562607	0.26461	0.0541978	0.666667	-1.29153	11.1	1.16865	0.96	7.91629	3.39892	10.1865	0	1	0	1
CAJA DE AHORROS DE SALAMANCA Y SORIA	Argentina	29	0	61	4	57	0	0	0	0	1	4.00345	1.28036	0.249754	-3.86767	0.279269	0.666667	-1.55102	10.6	2.54485	9.18	7.58824	3.39892	10.1865	0	1	0	1
CAJA DE AHORROS DE SALAMANCA Y SORIA	Australia	29	0	18	0	18	0	0	0	0	1	4.23231	0.567562	0.721527	0.26461	0.165512	0	-1.29153	5	-4.71452	2.8	7.30812	3.39892	10.1865	0	1	0	1
CAJA DE AHORROS DE SALAMANCA Y SORIA	Austria	29	0	13	0	13	0	0	0	0	1	3.23123	0.588788	0.518591	0.26461	0.0931028	0.333333	-1.55102	5.2	2.91401	1.8	6.91557	3.39892	10.1865	0	1	0	1
CAJA DE AHORROS DE SALAMANCA Y SORIA	Bangladesh	29	0	2	0	2	0	0	0	0	1	3.93561	2.63734	1.3076	0.26461	0.590559	0.333333	1.27716	4.3	1.15269	5.96	8.15174	3.39892	10.1865	0	1	0	1
CAJA DE AHORROS DE SALAMANCA Y SORIA	Belgium	29	0	38	3	35	0	0	0	0	1	3.13244	0.777357	0.634216	-0.25827	0.130961	0.666667	-1.29153	8.4	6.38874	1.25	7.02031	3.39892	10.1865	0	1	0	1
CAJA DE AHORROS DE SALAMANCA Y SORIA	Brasil	29	0	53	2	51	0	0	0	0	1	3.89327	1.91931	0.602092	-0.25827	0.406583	0.25	-1.55102	9.3	1.70724	2.94	8.27046	3.39892	10.1865	0	1	0	1
CAJA DE AHORROS DE SALAMANCA Y SORIA	Bulgaria	29	0	13	0	13	0	0	0	0	1	3.36942	1.12444	0.190378	0.26461	0.191694	0.5	-0.790003	10.1	8.1765	6.25	6.88874	3.39892	10.1865	0	1	0	1
CAJA DE AHORROS DE SALAMANCA Y SORIA	Canada	29	0	23	1	22	0	0	0	0	1	3.81425	0.103029	0.79255	-0.25827	0.161496	0.166667	-1.29153	6.7	3.0366	2.9	7.50919	3.39892	10.1865	0	1	0	1
CAJA DE AHORROS DE SALAMANCA Y SORIA	Chile	29	0	49	3	46	0	0	0	0	1	4.03132	1.48778	0.490568	-3.86767	0.146208	0.416667	-1.55102	8	5.60687	5.71	7.21206	3.39892	10.1865	0	1	0	1
CAJA DE AHORROS DE SALAMANCA Y SORIA	China	29	0	44	2	42	0	0	0	0	1	3.98191	1.90078	1.11489	0.52605	1.8939	0.333333	1.26844	4.2	3.22686	10.2	9.11544	3.39892	10.1865	0	1	0	1
CAJA DE AHORROS DE SALAMANCA Y SORIA	Colombia	29	0	33	3	30	0	0	0	0	1	3.90663	1.54759	0.748636	-3.86767	0.629637	0.166667	-1.55102	12	8.29023	4.72	7.65269	3.39892	10.1865	0	1	0	1
CAJA DE AHORROS DE SALAMANCA Y SORIA	South Korea	29	0	10	0	10	0	0	0	0	1	4.00439	0.420141	0.172921	0.52605	0.19628	0.541667	-0.271032	3.7	0.900652	4.2	7.68389	3.39892	10.1865	0	1	0	1
CAJA DE AHORROS DE SALAMANCA Y SORIA	Costa Rica	29	0	15	1	14	0	0	0	0	1	3.93278	1.54875	0.662422	-3.86767	0.00206424	0	-1.55102	6.6	3.26941	5.91	6.63621	3.39892	10.1865	0	1	0	1
CAJA DE AHORROS DE SALAMANCA Y SORIA	Croacia	29	0	8	0	8	0	0	0	0	1	3.22565	1.27885	0.253946	0.26461	1.01215	0.666667	-1.55102	12.6	4.3578	4.28	6.64771	3.39892	10.1865	0	1	0	1
CAJA DE AHORROS DE SALAMANCA Y SORIA	Denmark	29	0	10	0	10	0	0	0	0	1	3.31418	0.590138	0.733766	0.26461	0.112828	0.166667	-1.04949	4.8	2.05207	3.05	6.73368	3.39892	10.1865	0	1	0	1
CAJA DE AHORROS DE SALAMANCA Y SORIA	Ecuador	29	0	18	2	16	0	0	0	0	1	3.95347	1.61213	0.825643	-3.38939	0.280888	0.133333	-1.55102	7.7	5.24269	4.74	7.12151	3.39892	10.1865	0	1	0	1
CAJA DE AHORROS DE SALAMANCA Y SORIA	El Salvador	29	0	12	1	11	0	0	0	0	1	3.94102	2.12139	0.718083	-3.86767	0.459103	0.666667	-1.55102	7.2	3.05173	2.75	6.83765	3.39892	10.1865	0	1	0	1
CAJA DE AHORROS DE SALAMANCA Y SORIA	Slovakia	29	0	13	0	13	0	0	0	0	1	3.29809	0.931708	0.0511288	0.26461	0.296655	0.333333	-1.29153	16.2	4.02343	6.04	6.73135	3.39892	10.1865	0	1	0	1
CAJA DE AHORROS DE SALAMANCA Y SORIA	Slovenia	29	0	6	0	6	0	0	0	0	1	3.20355	0.40353	0.182051	0.26461	0.101477	0.333333	-1.29153	6.5	1.4438	4.03	6.30114	3.39892	10.1865	0	1	0	1
CAJA DE AHORROS DE SALAMANCA Y SORIA	USA	29	0	74	7	67	0	0	0	0	1	3.87141	0.553655	1.26073	-0.69195	0.15745	0.166667	-1.29153	5.1	0.800894	3.2	8.47189	3.39892	10.1865	0	1	0	1
CAJA DE AHORROS DE SALAMANCA Y SORIA	Estonia	29	0	3	0	3	0	0	0	0	1	3.46571	0.927963	0.110104	0.26461	0.20986	0.666667	-0.530518	7.9	20.7518	10.47	6.12908	3.39892	10.1865	0	1	0	1
CAJA DE AHORROS DE SALAMANCA Y SORIA	Ethiopia	29	0	2	0	2	0	0	0	0	1	3.72911	2.78128	1.3431	0.26461	1.26883	0.333333	-0.530518	5.4	1.80247	10.2	7.85282	3.39892	10.1865	0	1	0	1
CAJA DE AHORROS DE SALAMANCA Y SORIA	Philippine	29	0	12	1	11	0	0	0	0	1	4.07154	1.53391	0.995918	0.26461	0.359399	0.208333	-1.55102	7.7	1.1508	4.97	7.91936	3.39892	10.1865	0	1	0	1
CAJA DE AHORROS DE SALAMANCA Y SORIA	Finland	29	0	9	0	9	0	0	0	0	1	3.48105	0.507403	0.679478	0.52605	0.114138	0.0833333	-1.04949	8.4	2.36125	2.09	6.71984	3.39892	10.1865	0	1	0	1
CAJA DE AHORROS DE SALAMANCA Y SORIA	France	29	0	80	5	75	0	0	0	0	1	2.98175	0.490732	0.583416	-0.25827	0.0417816	0.333333	-1.29153	8.9	2.98952	1.19	7.78442	3.39892	10.1865	0	1	0	1
CAJA DE AHORROS DE SALAMANCA Y SORIA	Greece	29	0	20	1	19	0	0	0	0	1	3.35976	0.538884	0.215795	0.26461	0.101199	0.166667	-1.04949	9.8	0.269531	3.66	7.04548	3.39892	10.1865	0	1	0	1
CAJA DE AHORROS DE SALAMANCA Y SORIA	The Netherlands	29	0	23	0	23	0	0	0	0	1	3.17633	0.566689	0.663452	0.26461	0.0980731	0	-1.29153	4.7	6.98972	1.13	7.21272	3.39892	10.1865	0	1	0	1
CAJA DE AHORROS DE SALAMANCA Y SORIA	Hungary	29	0	20	1	19	0	0	0	0	1	3.29217	1.2511	0.147629	0.52605	0.00651064	0	-1.29153	7.2	6.0699	4.25	7.00376	3.39892	10.1865	0	1	0	1
CAJA DE AHORROS DE SALAMANCA Y SORIA	India	29	0	18	1	17	0	0	0	0	1	3.88339	2.24326	1.22135	0.26461	0.405146	0.333333	1.26844	4.4	0.818883	9.23	9.03925	3.39892	10.1865	0	1	0	1
CAJA DE AHORROS DE SALAMANCA Y SORIA	Ireland	29	0	19	1	18	0	0	0	0	1	3.18256	0.764228	0.019023	0.26461	0.0741923	0.666667	-1.55102	4.3	-11.284	5.5	6.619	3.39892	10.1865	0	1	0	1
CAJA DE AHORROS DE SALAMANCA Y SORIA	Iceland	29	0	2	0	2	0	0	0	0	1	3.47432	0.957051	0.692716	0.26461	0.110148	0.666667	-1.04949	2.6	14.7276	5.53	5.47239	3.39892	10.1865	0	1	0	1
CAJA DE AHORROS DE SALAMANCA Y SORIA	Israel	29	0	9	0	9	0	0	0	0	1	3.54353	1.46344	0.103381	-0.21367	0.110461	0	1.01767	9	4.52632	5.17	6.84033	3.39892	10.1865	0	1	0	1
CAJA DE AHORROS DE SALAMANCA Y SORIA	Italy	29	0	65	3	62	0	0	0	0	1	3.12249	0.419623	0.297329	-0.25827	0.00573603	0.25	-1.29153	7.7	1.13309	-3.56	7.76795	3.39892	10.1865	0	1	0	1
CAJA DE AHORROS DE SALAMANCA Y SORIA	Japan	29	0	15	2	13	0	0	0	0	1	4.02876	0.661939	0.887715	0.52605	0.0207448	0.416667	1.26844	4.4	0.0612047	2.6	8.10644	3.39892	10.1865	0	1	0	1
CAJA DE AHORROS DE SALAMANCA Y SORIA	Latvia	29	0	3	0	3	0	0	0	0	1	3.43418	0.923385	0.149979	0.26461	0.312954	0.416667	-1.03204	8.9	3.9397	10.6	6.36182	3.39892	10.1865	0	1	0	1
CAJA DE AHORROS DE SALAMANCA Y SORIA	Lithuania	29	0	2	0	2	0	0	0	0	1	3.41598	0.941538	0.270507	0.26461	0.206518	0.25	-1.29153	8.3	3.93337	7.56	6.5333	3.39892	10.1865	0	1	0	1
CAJA DE AHORROS DE SALAMANCA Y SORIA	Luxembourg	29	0	8	1	7	0	0	0	0	1	3.11354	1.69208	0.929135	-0.25827	0.11085	0.166667	-1.55102	4.5	10.1045	4.03	5.65964	3.39892	10.1865	0	1	0	1
CAJA DE AHORROS DE SALAMANCA Y SORIA	Malta	29	0	3	0	3	0	0	0	0	1	3.20679	1.13972	0.366184	0.52605	0.130339	0.333333	-1.55102	7.3	10.5646	2.49	5.60584	3.39892	10.1865	0	1	0	1
CAJA DE AHORROS DE SALAMANCA Y SORIA	Morocco	29	0	40	1	39	0	0	0	0	1	2.94765	2.40856	0.965929	0.52605	1.13327	0.166667	1.27716	11	5.6818	1.72	7.47918	3.39892	10.1865	0	1	0	1
CAJA DE AHORROS DE SALAMANCA Y SORIA	Mexico	29	0	68	5	63	0	0	0	0	1	3.96116	1.61593	0.61242	-3.86767	0.803904	0.333333	-1.55102	3.5	2.35186	2.8	8.01321	3.39892	10.1865	0	1	0	1
CAJA DE AHORROS DE SALAMANCA Y SORIA	Nigeria	29	0	2	0	2	0	0	0	0	1	3.5664	2.38172	1.08093	0.26461	1.74765	0.666667	-0.530518	5.6	3.50758	6.1	8.15031	3.39892	10.1865	0	1	0	1
CAJA DE AHORROS DE SALAMANCA Y SORIA	Norway	29	0	10	0	10	0	0	0	0	1	3.39007	0.558513	0.773884	0.26461	0.110833	0.166667	-1.04949	4.6	1.15494	2.26	6.66495	3.39892	10.1865	0	1	0	1
CAJA DE AHORROS DE SALAMANCA Y SORIA	New Zealand	29	0	2	0	2	0	0	0	0	1	4.2904	0.485975	0.553697	0.26461	0.0975475	0.666667	-0.790003	3.8	1.46672	1.9	6.61267	3.39892	10.1865	0	1	0	1
CAJA DE AHORROS DE SALAMANCA Y SORIA	Panama	29	0	24	3	21	0	0	0	0	1	3.91924	1.43673	0.720964	-3.38939	0.445543	0.666667	-1.29153	9.8	4.37245	6.91	6.5094	3.39892	10.1865	0	1	0	1
CAJA DE AHORROS DE SALAMANCA Y SORIA	Peru	29	0	33	3	30	0	0	0	0	1	3.97657	1.42631	0.798443	-3.38939	0.983327	0.666667	-1.55102	5.2	3.2493	6.45	7.44667	3.39892	10.1865	0	1	0	1
CAJA DE AHORROS DE SALAMANCA Y SORIA	Poland	29	0	53	3	50	0	0	0	0	1	3.33558	1.19959	0.38872	0.26461	0.0799061	0.25	-1.29153	17.7	2.54782	3.55	7.58167	3.39892	10.1865	0	1	0	1
CAJA DE AHORROS DE SALAMANCA Y SORIA	Portugal	29	1	102	10	92	0	0	0	0	1	2.8324	0.769779	0.315828	-0.25827	0.0980653	0.166667	-1.29153	7.6	1.69826	0.37	7.02323	3.39892	10.1865	0	1	0	1
CAJA DE AHORROS DE SALAMANCA Y SORIA	UK	29	0	68	4	64	0	0	0	0	1	3.15698	0.805554	0.679132	0.26461	0.00306242	0.5	-0.790003	4.7	7.47323	1.82	7.77979	3.39892	10.1865	0	1	0	1
CAJA DE AHORROS DE SALAMANCA Y SORIA	Czech Republic	29	0	28	1	27	0	0	0	0	1	3.26204	0.685613	0.00167352	0.26461	0.00949857	0.666667	-1.03204	7.9	8.86508	6.08	7.01005	3.39892	10.1865	0	1	0	1
CAJA DE AHORROS DE SALAMANCA Y SORIA	Romania	29	0	20	1	19	0	0	0	0	1	3.37913	1.01845	0.52496	-0.25827	0.348609	0.5	-0.790003	7.2	6.46266	4.1	7.33514	3.39892	10.1865	0	1	0	1
CAJA DE AHORROS DE SALAMANCA Y SORIA	Rusia	29	0	24	1	23	0	0	0	0	1	3.62123	0.696054	0.111071	0.26461	0.792843	0.666667	-0.790003	7.1	1.90974	6.4	8.15568	3.39892	10.1865	0	1	0	1
CAJA DE AHORROS DE SALAMANCA Y SORIA	Serbia	29	0	7	0	7	0	0	0	0	1	3.30011	1.33787	0.652569	0.26461	1.71416	0.333333	-0.790003	20.8	5.64939	4.68	6.90656	3.39892	10.1865	0	1	0	1
CAJA DE AHORROS DE SALAMANCA Y SORIA	Singapur	29	0	13	1	12	0	0	0	0	1	4.05448	1.4349	0.479333	0.26461	1.00484	0.666667	1.00895	4.1	17.2101	6.62	6.63767	3.39892	10.1865	0	1	0	1
CAJA DE AHORROS DE SALAMANCA Y SORIA	South Africa	29	0	14	0	14	0	0	0	0	1	3.91822	1.72008	0.6954	0.26461	0.167296	0	-0.790003	23.8	2.63118	5.1	7.67106	3.39892	10.1865	0	1	0	1
CAJA DE AHORROS DE SALAMANCA Y SORIA	Sweden	29	0	15	0	15	0	0	0	0	1	3.3956	0.90496	0.81257	0.26461	0.108496	0	-0.790003	7.7	3.74326	2.7	6.9554	3.39892	10.1865	0	1	0	1
CAJA DE AHORROS DE SALAMANCA Y SORIA	Switzerland	29	0	18	2	16	0	0	0	0	1	3.91415	0.836495	0.694867	-0.21367	0.150978	0.166667	-1.55102	4.4	1.57889	1.9	6.8714	3.39892	10.1865	0	1	0	1
CAJA DE AHORROS DE SALAMANCA Y SORIA	Thailand	29	0	14	0	14	0	0	0	0	1	4.00637	1.44759	1.08846	0.52605	0.353899	0.666667	1.26844	1.3	2.09225	4.49	7.80776	3.39892	10.1865	0	1	0	1
CAJA DE AHORROS DE SALAMANCA Y SORIA	Turquia	29	0	18	1	17	0	0	0	0	1	3.47222	1.60088	0.7561	0.52605	0.628774	0.666667	1.27716	10.6	2.66423	7.38	7.85772	3.39892	10.1865	0	1	0	1
CAJA DE AHORROS DE SALAMANCA Y SORIA	Uruguay	29	0	23	3	20	0	0	0	0	1	3.99607	1.1487	0.233146	-3.86767	0.14597	0.666667	-1.29153	12.2	3.61146	6.56	6.51927	3.39892	10.1865	0	1	0	1
CAJA DE AHORROS DE SALAMANCA Y SORIA	Venezuela	29	0	31	3	28	0	0	0	0	1	3.8557	1.76796	0.336214	-3.86767	0.309872	0.166667	-1.55102	11.4	2.04181	10.33	7.42451	3.39892	10.1865	0	1	0	1
CAJA DE AHORROS DEL MEDITERRANEO	Germany	30	0	56	2	54	0	0	0	0	1	3.21148	0.536164	0.562607	0.26461	0.0541978	0.666667	-1.29153	11.1	1.16865	0.96	7.91629	3.74626	16.5304	0	1	0	1
CAJA DE AHORROS DEL MEDITERRANEO	Argentina	30	0	61	4	57	0	0	0	0	1	4.00345	1.28036	0.249754	-3.86767	0.279269	0.666667	-1.55102	10.6	2.54485	9.18	7.58824	3.74626	16.5304	0	1	0	1
CAJA DE AHORROS DEL MEDITERRANEO	Australia	30	0	18	0	18	0	0	0	0	1	4.23231	0.567562	0.721527	0.26461	0.165512	0	-1.29153	5	-4.71452	2.8	7.30812	3.74626	16.5304	0	1	0	1
CAJA DE AHORROS DEL MEDITERRANEO	Austria	30	0	13	0	13	0	0	0	0	1	3.23123	0.588788	0.518591	0.26461	0.0931028	0.333333	-1.55102	5.2	2.91401	1.8	6.91557	3.74626	16.5304	0	1	0	1
CAJA DE AHORROS DEL MEDITERRANEO	Bangladesh	30	0	2	0	2	0	0	0	0	1	3.93561	2.63734	1.3076	0.26461	0.590559	0.333333	1.27716	4.3	1.15269	5.96	8.15174	3.74626	16.5304	0	1	0	1
CAJA DE AHORROS DEL MEDITERRANEO	Belgium	30	0	38	3	35	0	0	0	0	1	3.13244	0.777357	0.634216	-0.25827	0.130961	0.666667	-1.29153	8.4	6.38874	1.25	7.02031	3.74626	16.5304	0	1	0	1
CAJA DE AHORROS DEL MEDITERRANEO	Brasil	30	0	53	2	51	0	0	0	0	1	3.89327	1.91931	0.602092	-0.25827	0.406583	0.25	-1.55102	9.3	1.70724	2.94	8.27046	3.74626	16.5304	0	1	0	1
CAJA DE AHORROS DEL MEDITERRANEO	Bulgaria	30	0	13	0	13	0	0	0	0	1	3.36942	1.12444	0.190378	0.26461	0.191694	0.5	-0.790003	10.1	8.1765	6.25	6.88874	3.74626	16.5304	0	1	0	1
CAJA DE AHORROS DEL MEDITERRANEO	Canada	30	0	23	1	22	0	0	0	0	1	3.81425	0.103029	0.79255	-0.25827	0.161496	0.166667	-1.29153	6.7	3.0366	2.9	7.50919	3.74626	16.5304	0	1	0	1
CAJA DE AHORROS DEL MEDITERRANEO	Chile	30	0	49	3	46	0	0	0	0	1	4.03132	1.48778	0.490568	-3.86767	0.146208	0.416667	-1.55102	8	5.60687	5.71	7.21206	3.74626	16.5304	0	1	0	1
CAJA DE AHORROS DEL MEDITERRANEO	China	30	0	44	2	42	0	0	0	0	1	3.98191	1.90078	1.11489	0.52605	1.8939	0.333333	1.26844	4.2	3.22686	10.2	9.11544	3.74626	16.5304	0	1	0	1
CAJA DE AHORROS DEL MEDITERRANEO	Colombia	30	0	33	3	30	0	0	0	0	1	3.90663	1.54759	0.748636	-3.86767	0.629637	0.166667	-1.55102	12	8.29023	4.72	7.65269	3.74626	16.5304	0	1	0	1
CAJA DE AHORROS DEL MEDITERRANEO	South Korea	30	0	10	0	10	0	0	0	0	1	4.00439	0.420141	0.172921	0.52605	0.19628	0.541667	-0.271032	3.7	0.900652	4.2	7.68389	3.74626	16.5304	0	1	0	1
CAJA DE AHORROS DEL MEDITERRANEO	Costa Rica	30	0	15	1	14	0	0	0	0	1	3.93278	1.54875	0.662422	-3.86767	0.00206424	0	-1.55102	6.6	3.26941	5.91	6.63621	3.74626	16.5304	0	1	0	1
CAJA DE AHORROS DEL MEDITERRANEO	Croacia	30	0	8	0	8	0	0	0	0	1	3.22565	1.27885	0.253946	0.26461	1.01215	0.666667	-1.55102	12.6	4.3578	4.28	6.64771	3.74626	16.5304	0	1	0	1
CAJA DE AHORROS DEL MEDITERRANEO	Denmark	30	0	10	0	10	0	0	0	0	1	3.31418	0.590138	0.733766	0.26461	0.112828	0.166667	-1.04949	4.8	2.05207	3.05	6.73368	3.74626	16.5304	0	1	0	1
CAJA DE AHORROS DEL MEDITERRANEO	Ecuador	30	0	18	2	16	0	0	0	0	1	3.95347	1.61213	0.825643	-3.38939	0.280888	0.133333	-1.55102	7.7	5.24269	4.74	7.12151	3.74626	16.5304	0	1	0	1
CAJA DE AHORROS DEL MEDITERRANEO	El Salvador	30	0	12	1	11	0	0	0	0	1	3.94102	2.12139	0.718083	-3.86767	0.459103	0.666667	-1.55102	7.2	3.05173	2.75	6.83765	3.74626	16.5304	0	1	0	1
CAJA DE AHORROS DEL MEDITERRANEO	Slovakia	30	0	13	0	13	0	0	0	0	1	3.29809	0.931708	0.0511288	0.26461	0.296655	0.333333	-1.29153	16.2	4.02343	6.04	6.73135	3.74626	16.5304	0	1	0	1
CAJA DE AHORROS DEL MEDITERRANEO	Slovenia	30	0	6	0	6	0	0	0	0	1	3.20355	0.40353	0.182051	0.26461	0.101477	0.333333	-1.29153	6.5	1.4438	4.03	6.30114	3.74626	16.5304	0	1	0	1
CAJA DE AHORROS DEL MEDITERRANEO	USA	30	1	74	7	67	0	0	0	0	1	3.87141	0.553655	1.26073	-0.69195	0.15745	0.166667	-1.29153	5.1	0.800894	3.2	8.47189	3.74626	16.5304	0	1	0	1
CAJA DE AHORROS DEL MEDITERRANEO	Estonia	30	0	3	0	3	0	0	0	0	1	3.46571	0.927963	0.110104	0.26461	0.20986	0.666667	-0.530518	7.9	20.7518	10.47	6.12908	3.74626	16.5304	0	1	0	1
CAJA DE AHORROS DEL MEDITERRANEO	Ethiopia	30	0	2	0	2	0	0	0	0	1	3.72911	2.78128	1.3431	0.26461	1.26883	0.333333	-0.530518	5.4	1.80247	10.2	7.85282	3.74626	16.5304	0	1	0	1
CAJA DE AHORROS DEL MEDITERRANEO	Philippine	30	0	12	1	11	0	0	0	0	1	4.07154	1.53391	0.995918	0.26461	0.359399	0.208333	-1.55102	7.7	1.1508	4.97	7.91936	3.74626	16.5304	0	1	0	1
CAJA DE AHORROS DEL MEDITERRANEO	Finland	30	0	9	0	9	0	0	0	0	1	3.48105	0.507403	0.679478	0.52605	0.114138	0.0833333	-1.04949	8.4	2.36125	2.09	6.71984	3.74626	16.5304	0	1	0	1
CAJA DE AHORROS DEL MEDITERRANEO	France	30	0	80	5	75	0	0	0	0	1	2.98175	0.490732	0.583416	-0.25827	0.0417816	0.333333	-1.29153	8.9	2.98952	1.19	7.78442	3.74626	16.5304	0	1	0	1
CAJA DE AHORROS DEL MEDITERRANEO	Greece	30	0	20	1	19	0	0	0	0	1	3.35976	0.538884	0.215795	0.26461	0.101199	0.166667	-1.04949	9.8	0.269531	3.66	7.04548	3.74626	16.5304	0	1	0	1
CAJA DE AHORROS DEL MEDITERRANEO	The Netherlands	30	0	23	0	23	0	0	0	0	1	3.17633	0.566689	0.663452	0.26461	0.0980731	0	-1.29153	4.7	6.98972	1.13	7.21272	3.74626	16.5304	0	1	0	1
CAJA DE AHORROS DEL MEDITERRANEO	Hungary	30	0	20	1	19	0	0	0	0	1	3.29217	1.2511	0.147629	0.52605	0.00651064	0	-1.29153	7.2	6.0699	4.25	7.00376	3.74626	16.5304	0	1	0	1
CAJA DE AHORROS DEL MEDITERRANEO	India	30	0	18	1	17	0	0	0	0	1	3.88339	2.24326	1.22135	0.26461	0.405146	0.333333	1.26844	4.4	0.818883	9.23	9.03925	3.74626	16.5304	0	1	0	1
CAJA DE AHORROS DEL MEDITERRANEO	Ireland	30	0	19	1	18	0	0	0	0	1	3.18256	0.764228	0.019023	0.26461	0.0741923	0.666667	-1.55102	4.3	-11.284	5.5	6.619	3.74626	16.5304	0	1	0	1
CAJA DE AHORROS DEL MEDITERRANEO	Iceland	30	0	2	0	2	0	0	0	0	1	3.47432	0.957051	0.692716	0.26461	0.110148	0.666667	-1.04949	2.6	14.7276	5.53	5.47239	3.74626	16.5304	0	1	0	1
CAJA DE AHORROS DEL MEDITERRANEO	Israel	30	0	9	0	9	0	0	0	0	1	3.54353	1.46344	0.103381	-0.21367	0.110461	0	1.01767	9	4.52632	5.17	6.84033	3.74626	16.5304	0	1	0	1
CAJA DE AHORROS DEL MEDITERRANEO	Italy	30	0	65	3	62	0	0	0	0	1	3.12249	0.419623	0.297329	-0.25827	0.00573603	0.25	-1.29153	7.7	1.13309	-3.56	7.76795	3.74626	16.5304	0	1	0	1
CAJA DE AHORROS DEL MEDITERRANEO	Japan	30	0	15	2	13	0	0	0	0	1	4.02876	0.661939	0.887715	0.52605	0.0207448	0.416667	1.26844	4.4	0.0612047	2.6	8.10644	3.74626	16.5304	0	1	0	1
CAJA DE AHORROS DEL MEDITERRANEO	Latvia	30	0	3	0	3	0	0	0	0	1	3.43418	0.923385	0.149979	0.26461	0.312954	0.416667	-1.03204	8.9	3.9397	10.6	6.36182	3.74626	16.5304	0	1	0	1
CAJA DE AHORROS DEL MEDITERRANEO	Lithuania	30	0	2	0	2	0	0	0	0	1	3.41598	0.941538	0.270507	0.26461	0.206518	0.25	-1.29153	8.3	3.93337	7.56	6.5333	3.74626	16.5304	0	1	0	1
CAJA DE AHORROS DEL MEDITERRANEO	Luxembourg	30	0	8	1	7	0	0	0	0	1	3.11354	1.69208	0.929135	-0.25827	0.11085	0.166667	-1.55102	4.5	10.1045	4.03	5.65964	3.74626	16.5304	0	1	0	1
CAJA DE AHORROS DEL MEDITERRANEO	Malta	30	0	3	0	3	0	0	0	0	1	3.20679	1.13972	0.366184	0.52605	0.130339	0.333333	-1.55102	7.3	10.5646	2.49	5.60584	3.74626	16.5304	0	1	0	1
CAJA DE AHORROS DEL MEDITERRANEO	Morocco	30	0	40	1	39	0	0	0	0	1	2.94765	2.40856	0.965929	0.52605	1.13327	0.166667	1.27716	11	5.6818	1.72	7.47918	3.74626	16.5304	0	1	0	1
CAJA DE AHORROS DEL MEDITERRANEO	Mexico	30	0	68	5	63	0	0	0	0	1	3.96116	1.61593	0.61242	-3.86767	0.803904	0.333333	-1.55102	3.5	2.35186	2.8	8.01321	3.74626	16.5304	0	1	0	1
CAJA DE AHORROS DEL MEDITERRANEO	Nigeria	30	0	2	0	2	0	0	0	0	1	3.5664	2.38172	1.08093	0.26461	1.74765	0.666667	-0.530518	5.6	3.50758	6.1	8.15031	3.74626	16.5304	0	1	0	1
CAJA DE AHORROS DEL MEDITERRANEO	Norway	30	0	10	0	10	0	0	0	0	1	3.39007	0.558513	0.773884	0.26461	0.110833	0.166667	-1.04949	4.6	1.15494	2.26	6.66495	3.74626	16.5304	0	1	0	1
CAJA DE AHORROS DEL MEDITERRANEO	New Zealand	30	0	2	0	2	0	0	0	0	1	4.2904	0.485975	0.553697	0.26461	0.0975475	0.666667	-0.790003	3.8	1.46672	1.9	6.61267	3.74626	16.5304	0	1	0	1
CAJA DE AHORROS DEL MEDITERRANEO	Panama	30	0	24	3	21	0	0	0	0	1	3.91924	1.43673	0.720964	-3.38939	0.445543	0.666667	-1.29153	9.8	4.37245	6.91	6.5094	3.74626	16.5304	0	1	0	1
CAJA DE AHORROS DEL MEDITERRANEO	Peru	30	0	33	3	30	0	0	0	0	1	3.97657	1.42631	0.798443	-3.38939	0.983327	0.666667	-1.55102	5.2	3.2493	6.45	7.44667	3.74626	16.5304	0	1	0	1
CAJA DE AHORROS DEL MEDITERRANEO	Poland	30	0	53	3	50	0	0	0	0	1	3.33558	1.19959	0.38872	0.26461	0.0799061	0.25	-1.29153	17.7	2.54782	3.55	7.58167	3.74626	16.5304	0	1	0	1
CAJA DE AHORROS DEL MEDITERRANEO	Portugal	30	0	102	10	92	0	0	0	0	1	2.8324	0.769779	0.315828	-0.25827	0.0980653	0.166667	-1.29153	7.6	1.69826	0.37	7.02323	3.74626	16.5304	0	1	0	1
CAJA DE AHORROS DEL MEDITERRANEO	UK	30	0	68	4	64	0	0	0	0	1	3.15698	0.805554	0.679132	0.26461	0.00306242	0.5	-0.790003	4.7	7.47323	1.82	7.77979	3.74626	16.5304	0	1	0	1
CAJA DE AHORROS DEL MEDITERRANEO	Czech Republic	30	0	28	1	27	0	0	0	0	1	3.26204	0.685613	0.00167352	0.26461	0.00949857	0.666667	-1.03204	7.9	8.86508	6.08	7.01005	3.74626	16.5304	0	1	0	1
CAJA DE AHORROS DEL MEDITERRANEO	Romania	30	0	20	1	19	0	0	0	0	1	3.37913	1.01845	0.52496	-0.25827	0.348609	0.5	-0.790003	7.2	6.46266	4.1	7.33514	3.74626	16.5304	0	1	0	1
CAJA DE AHORROS DEL MEDITERRANEO	Rusia	30	0	24	1	23	0	0	0	0	1	3.62123	0.696054	0.111071	0.26461	0.792843	0.666667	-0.790003	7.1	1.90974	6.4	8.15568	3.74626	16.5304	0	1	0	1
CAJA DE AHORROS DEL MEDITERRANEO	Serbia	30	0	7	0	7	0	0	0	0	1	3.30011	1.33787	0.652569	0.26461	1.71416	0.333333	-0.790003	20.8	5.64939	4.68	6.90656	3.74626	16.5304	0	1	0	1
CAJA DE AHORROS DEL MEDITERRANEO	Singapur	30	0	13	1	12	0	0	0	0	1	4.05448	1.4349	0.479333	0.26461	1.00484	0.666667	1.00895	4.1	17.2101	6.62	6.63767	3.74626	16.5304	0	1	0	1
CAJA DE AHORROS DEL MEDITERRANEO	South Africa	30	0	14	0	14	0	0	0	0	1	3.91822	1.72008	0.6954	0.26461	0.167296	0	-0.790003	23.8	2.63118	5.1	7.67106	3.74626	16.5304	0	1	0	1
CAJA DE AHORROS DEL MEDITERRANEO	Sweden	30	0	15	0	15	0	0	0	0	1	3.3956	0.90496	0.81257	0.26461	0.108496	0	-0.790003	7.7	3.74326	2.7	6.9554	3.74626	16.5304	0	1	0	1
CAJA DE AHORROS DEL MEDITERRANEO	Switzerland	30	0	18	2	16	0	0	0	0	1	3.91415	0.836495	0.694867	-0.21367	0.150978	0.166667	-1.55102	4.4	1.57889	1.9	6.8714	3.74626	16.5304	0	1	0	1
CAJA DE AHORROS DEL MEDITERRANEO	Thailand	30	0	14	0	14	0	0	0	0	1	4.00637	1.44759	1.08846	0.52605	0.353899	0.666667	1.26844	1.3	2.09225	4.49	7.80776	3.74626	16.5304	0	1	0	1
CAJA DE AHORROS DEL MEDITERRANEO	Turquia	30	0	18	1	17	0	0	0	0	1	3.47222	1.60088	0.7561	0.52605	0.628774	0.666667	1.27716	10.6	2.66423	7.38	7.85772	3.74626	16.5304	0	1	0	1
CAJA DE AHORROS DEL MEDITERRANEO	Uruguay	30	0	23	3	20	0	0	0	0	1	3.99607	1.1487	0.233146	-3.86767	0.14597	0.666667	-1.29153	12.2	3.61146	6.56	6.51927	3.74626	16.5304	0	1	0	1
CAJA DE AHORROS DEL MEDITERRANEO	Venezuela	30	0	31	3	28	0	0	0	0	1	3.8557	1.76796	0.336214	-3.86767	0.309872	0.166667	-1.55102	11.4	2.04181	10.33	7.42451	3.74626	16.5304	0	1	0	1
CAJAMADRID	Germany	31	0	56	2	54	0	0	0	0	1	3.21148	0.536164	0.562607	0.26461	0.0541978	0.666667	-1.29153	11.1	1.16865	0.96	7.91629	4.07429	14.5243	0	1	0	1
CAJAMADRID	Argentina	31	0	61	4	57	0	0	0	0	1	4.00345	1.28036	0.249754	-3.86767	0.279269	0.666667	-1.55102	10.6	2.54485	9.18	7.58824	4.07429	14.5243	0	1	0	1
CAJAMADRID	Australia	31	0	18	0	18	0	0	0	0	1	4.23231	0.567562	0.721527	0.26461	0.165512	0	-1.29153	5	-4.71452	2.8	7.30812	4.07429	14.5243	0	1	0	1
CAJAMADRID	Austria	31	0	13	0	13	0	0	0	0	1	3.23123	0.588788	0.518591	0.26461	0.0931028	0.333333	-1.55102	5.2	2.91401	1.8	6.91557	4.07429	14.5243	0	1	0	1
CAJAMADRID	Bangladesh	31	0	2	0	2	0	0	0	0	1	3.93561	2.63734	1.3076	0.26461	0.590559	0.333333	1.27716	4.3	1.15269	5.96	8.15174	4.07429	14.5243	0	1	0	1
CAJAMADRID	Belgium	31	0	38	3	35	0	0	0	0	1	3.13244	0.777357	0.634216	-0.25827	0.130961	0.666667	-1.29153	8.4	6.38874	1.25	7.02031	4.07429	14.5243	0	1	0	1
CAJAMADRID	Brasil	31	0	53	2	51	0	0	0	0	1	3.89327	1.91931	0.602092	-0.25827	0.406583	0.25	-1.55102	9.3	1.70724	2.94	8.27046	4.07429	14.5243	0	1	0	1
CAJAMADRID	Bulgaria	31	0	13	0	13	0	0	0	0	1	3.36942	1.12444	0.190378	0.26461	0.191694	0.5	-0.790003	10.1	8.1765	6.25	6.88874	4.07429	14.5243	0	1	0	1
CAJAMADRID	Canada	31	0	23	1	22	0	0	0	0	1	3.81425	0.103029	0.79255	-0.25827	0.161496	0.166667	-1.29153	6.7	3.0366	2.9	7.50919	4.07429	14.5243	0	1	0	1
CAJAMADRID	Chile	31	0	49	3	46	0	0	0	0	1	4.03132	1.48778	0.490568	-3.86767	0.146208	0.416667	-1.55102	8	5.60687	5.71	7.21206	4.07429	14.5243	0	1	0	1
CAJAMADRID	China	31	0	44	2	42	0	0	0	0	1	3.98191	1.90078	1.11489	0.52605	1.8939	0.333333	1.26844	4.2	3.22686	10.2	9.11544	4.07429	14.5243	0	1	0	1
CAJAMADRID	Colombia	31	0	33	3	30	0	0	0	0	1	3.90663	1.54759	0.748636	-3.86767	0.629637	0.166667	-1.55102	12	8.29023	4.72	7.65269	4.07429	14.5243	0	1	0	1
CAJAMADRID	South Korea	31	0	10	0	10	0	0	0	0	1	4.00439	0.420141	0.172921	0.52605	0.19628	0.541667	-0.271032	3.7	0.900652	4.2	7.68389	4.07429	14.5243	0	1	0	1
CAJAMADRID	Costa Rica	31	0	15	1	14	0	0	0	0	1	3.93278	1.54875	0.662422	-3.86767	0.00206424	0	-1.55102	6.6	3.26941	5.91	6.63621	4.07429	14.5243	0	1	0	1
CAJAMADRID	Croacia	31	0	8	0	8	0	0	0	0	1	3.22565	1.27885	0.253946	0.26461	1.01215	0.666667	-1.55102	12.6	4.3578	4.28	6.64771	4.07429	14.5243	0	1	0	1
CAJAMADRID	Denmark	31	0	10	0	10	0	0	0	0	1	3.31418	0.590138	0.733766	0.26461	0.112828	0.166667	-1.04949	4.8	2.05207	3.05	6.73368	4.07429	14.5243	0	1	0	1
CAJAMADRID	Ecuador	31	0	18	2	16	0	0	0	0	1	3.95347	1.61213	0.825643	-3.38939	0.280888	0.133333	-1.55102	7.7	5.24269	4.74	7.12151	4.07429	14.5243	0	1	0	1
CAJAMADRID	El Salvador	31	0	12	1	11	0	0	0	0	1	3.94102	2.12139	0.718083	-3.86767	0.459103	0.666667	-1.55102	7.2	3.05173	2.75	6.83765	4.07429	14.5243	0	1	0	1
CAJAMADRID	Slovakia	31	0	13	0	13	0	0	0	0	1	3.29809	0.931708	0.0511288	0.26461	0.296655	0.333333	-1.29153	16.2	4.02343	6.04	6.73135	4.07429	14.5243	0	1	0	1
CAJAMADRID	Slovenia	31	0	6	0	6	0	0	0	0	1	3.20355	0.40353	0.182051	0.26461	0.101477	0.333333	-1.29153	6.5	1.4438	4.03	6.30114	4.07429	14.5243	0	1	0	1
CAJAMADRID	USA	31	0	74	7	67	0	0	0	0	1	3.87141	0.553655	1.26073	-0.69195	0.15745	0.166667	-1.29153	5.1	0.800894	3.2	8.47189	4.07429	14.5243	0	1	0	1
CAJAMADRID	Estonia	31	0	3	0	3	0	0	0	0	1	3.46571	0.927963	0.110104	0.26461	0.20986	0.666667	-0.530518	7.9	20.7518	10.47	6.12908	4.07429	14.5243	0	1	0	1
CAJAMADRID	Ethiopia	31	0	2	0	2	0	0	0	0	1	3.72911	2.78128	1.3431	0.26461	1.26883	0.333333	-0.530518	5.4	1.80247	10.2	7.85282	4.07429	14.5243	0	1	0	1
CAJAMADRID	Philippine	31	0	12	1	11	0	0	0	0	1	4.07154	1.53391	0.995918	0.26461	0.359399	0.208333	-1.55102	7.7	1.1508	4.97	7.91936	4.07429	14.5243	0	1	0	1
CAJAMADRID	Finland	31	0	9	0	9	0	0	0	0	1	3.48105	0.507403	0.679478	0.52605	0.114138	0.0833333	-1.04949	8.4	2.36125	2.09	6.71984	4.07429	14.5243	0	1	0	1
CAJAMADRID	France	31	0	80	5	75	0	0	0	0	1	2.98175	0.490732	0.583416	-0.25827	0.0417816	0.333333	-1.29153	8.9	2.98952	1.19	7.78442	4.07429	14.5243	0	1	0	1
CAJAMADRID	Greece	31	0	20	1	19	0	0	0	0	1	3.35976	0.538884	0.215795	0.26461	0.101199	0.166667	-1.04949	9.8	0.269531	3.66	7.04548	4.07429	14.5243	0	1	0	1
CAJAMADRID	The Netherlands	31	0	23	0	23	0	0	0	0	1	3.17633	0.566689	0.663452	0.26461	0.0980731	0	-1.29153	4.7	6.98972	1.13	7.21272	4.07429	14.5243	0	1	0	1
CAJAMADRID	Hungary	31	0	20	1	19	0	0	0	0	1	3.29217	1.2511	0.147629	0.52605	0.00651064	0	-1.29153	7.2	6.0699	4.25	7.00376	4.07429	14.5243	0	1	0	1
CAJAMADRID	India	31	0	18	1	17	0	0	0	0	1	3.88339	2.24326	1.22135	0.26461	0.405146	0.333333	1.26844	4.4	0.818883	9.23	9.03925	4.07429	14.5243	0	1	0	1
CAJAMADRID	Ireland	31	0	19	1	18	0	0	0	0	1	3.18256	0.764228	0.019023	0.26461	0.0741923	0.666667	-1.55102	4.3	-11.284	5.5	6.619	4.07429	14.5243	0	1	0	1
CAJAMADRID	Iceland	31	0	2	0	2	0	0	0	0	1	3.47432	0.957051	0.692716	0.26461	0.110148	0.666667	-1.04949	2.6	14.7276	5.53	5.47239	4.07429	14.5243	0	1	0	1
CAJAMADRID	Israel	31	0	9	0	9	0	0	0	0	1	3.54353	1.46344	0.103381	-0.21367	0.110461	0	1.01767	9	4.52632	5.17	6.84033	4.07429	14.5243	0	1	0	1
CAJAMADRID	Italy	31	0	65	3	62	0	0	0	0	1	3.12249	0.419623	0.297329	-0.25827	0.00573603	0.25	-1.29153	7.7	1.13309	-3.56	7.76795	4.07429	14.5243	0	1	0	1
CAJAMADRID	Japan	31	0	15	2	13	0	0	0	0	1	4.02876	0.661939	0.887715	0.52605	0.0207448	0.416667	1.26844	4.4	0.0612047	2.6	8.10644	4.07429	14.5243	0	1	0	1
CAJAMADRID	Latvia	31	0	3	0	3	0	0	0	0	1	3.43418	0.923385	0.149979	0.26461	0.312954	0.416667	-1.03204	8.9	3.9397	10.6	6.36182	4.07429	14.5243	0	1	0	1
CAJAMADRID	Lithuania	31	0	2	0	2	0	0	0	0	1	3.41598	0.941538	0.270507	0.26461	0.206518	0.25	-1.29153	8.3	3.93337	7.56	6.5333	4.07429	14.5243	0	1	0	1
CAJAMADRID	Luxembourg	31	0	8	1	7	0	0	0	0	1	3.11354	1.69208	0.929135	-0.25827	0.11085	0.166667	-1.55102	4.5	10.1045	4.03	5.65964	4.07429	14.5243	0	1	0	1
CAJAMADRID	Malta	31	0	3	0	3	0	0	0	0	1	3.20679	1.13972	0.366184	0.52605	0.130339	0.333333	-1.55102	7.3	10.5646	2.49	5.60584	4.07429	14.5243	0	1	0	1
CAJAMADRID	Morocco	31	0	40	1	39	0	0	0	0	1	2.94765	2.40856	0.965929	0.52605	1.13327	0.166667	1.27716	11	5.6818	1.72	7.47918	4.07429	14.5243	0	1	0	1
CAJAMADRID	Mexico	31	0	68	5	63	0	0	0	0	1	3.96116	1.61593	0.61242	-3.86767	0.803904	0.333333	-1.55102	3.5	2.35186	2.8	8.01321	4.07429	14.5243	0	1	0	1
CAJAMADRID	Nigeria	31	0	2	0	2	0	0	0	0	1	3.5664	2.38172	1.08093	0.26461	1.74765	0.666667	-0.530518	5.6	3.50758	6.1	8.15031	4.07429	14.5243	0	1	0	1
CAJAMADRID	Norway	31	0	10	0	10	0	0	0	0	1	3.39007	0.558513	0.773884	0.26461	0.110833	0.166667	-1.04949	4.6	1.15494	2.26	6.66495	4.07429	14.5243	0	1	0	1
CAJAMADRID	New Zealand	31	0	2	0	2	0	0	0	0	1	4.2904	0.485975	0.553697	0.26461	0.0975475	0.666667	-0.790003	3.8	1.46672	1.9	6.61267	4.07429	14.5243	0	1	0	1
CAJAMADRID	Panama	31	0	24	3	21	0	0	0	0	1	3.91924	1.43673	0.720964	-3.38939	0.445543	0.666667	-1.29153	9.8	4.37245	6.91	6.5094	4.07429	14.5243	0	1	0	1
CAJAMADRID	Peru	31	0	33	3	30	0	0	0	0	1	3.97657	1.42631	0.798443	-3.38939	0.983327	0.666667	-1.55102	5.2	3.2493	6.45	7.44667	4.07429	14.5243	0	1	0	1
CAJAMADRID	Poland	31	0	53	3	50	0	0	0	0	1	3.33558	1.19959	0.38872	0.26461	0.0799061	0.25	-1.29153	17.7	2.54782	3.55	7.58167	4.07429	14.5243	0	1	0	1
CAJAMADRID	Portugal	31	1	102	10	92	0	0	0	0	1	2.8324	0.769779	0.315828	-0.25827	0.0980653	0.166667	-1.29153	7.6	1.69826	0.37	7.02323	4.07429	14.5243	0	1	0	1
CAJAMADRID	UK	31	0	68	4	64	0	0	0	0	1	3.15698	0.805554	0.679132	0.26461	0.00306242	0.5	-0.790003	4.7	7.47323	1.82	7.77979	4.07429	14.5243	0	1	0	1
CAJAMADRID	Czech Republic	31	0	28	1	27	0	0	0	0	1	3.26204	0.685613	0.00167352	0.26461	0.00949857	0.666667	-1.03204	7.9	8.86508	6.08	7.01005	4.07429	14.5243	0	1	0	1
CAJAMADRID	Romania	31	0	20	1	19	0	0	0	0	1	3.37913	1.01845	0.52496	-0.25827	0.348609	0.5	-0.790003	7.2	6.46266	4.1	7.33514	4.07429	14.5243	0	1	0	1
CAJAMADRID	Rusia	31	0	24	1	23	0	0	0	0	1	3.62123	0.696054	0.111071	0.26461	0.792843	0.666667	-0.790003	7.1	1.90974	6.4	8.15568	4.07429	14.5243	0	1	0	1
CAJAMADRID	Serbia	31	0	7	0	7	0	0	0	0	1	3.30011	1.33787	0.652569	0.26461	1.71416	0.333333	-0.790003	20.8	5.64939	4.68	6.90656	4.07429	14.5243	0	1	0	1
CAJAMADRID	Singapur	31	0	13	1	12	0	0	0	0	1	4.05448	1.4349	0.479333	0.26461	1.00484	0.666667	1.00895	4.1	17.2101	6.62	6.63767	4.07429	14.5243	0	1	0	1
CAJAMADRID	South Africa	31	0	14	0	14	0	0	0	0	1	3.91822	1.72008	0.6954	0.26461	0.167296	0	-0.790003	23.8	2.63118	5.1	7.67106	4.07429	14.5243	0	1	0	1
CAJAMADRID	Sweden	31	0	15	0	15	0	0	0	0	1	3.3956	0.90496	0.81257	0.26461	0.108496	0	-0.790003	7.7	3.74326	2.7	6.9554	4.07429	14.5243	0	1	0	1
CAJAMADRID	Switzerland	31	0	18	2	16	0	0	0	0	1	3.91415	0.836495	0.694867	-0.21367	0.150978	0.166667	-1.55102	4.4	1.57889	1.9	6.8714	4.07429	14.5243	0	1	0	1
CAJAMADRID	Thailand	31	0	14	0	14	0	0	0	0	1	4.00637	1.44759	1.08846	0.52605	0.353899	0.666667	1.26844	1.3	2.09225	4.49	7.80776	4.07429	14.5243	0	1	0	1
CAJAMADRID	Turquia	31	0	18	1	17	0	0	0	0	1	3.47222	1.60088	0.7561	0.52605	0.628774	0.666667	1.27716	10.6	2.66423	7.38	7.85772	4.07429	14.5243	0	1	0	1
CAJAMADRID	Uruguay	31	0	23	3	20	0	0	0	0	1	3.99607	1.1487	0.233146	-3.86767	0.14597	0.666667	-1.29153	12.2	3.61146	6.56	6.51927	4.07429	14.5243	0	1	0	1
CAJAMADRID	Venezuela	31	0	31	3	28	0	0	0	0	1	3.8557	1.76796	0.336214	-3.86767	0.309872	0.166667	-1.55102	11.4	2.04181	10.33	7.42451	4.07429	14.5243	0	1	0	1
CAMPER S.L.	Germany	32	1	56	29	27	1	0	0	0	0	3.21148	0.536164	0.562607	0.26461	0.0541978	0.666667	-1.29153	11.1	1.16865	0.96	7.91629	2.7894	12.2127	0	0	0	50
CAMPER S.L.	Argentina	32	0	61	22	39	1	0	0	0	0	4.00345	1.28036	0.249754	-3.86767	0.279269	0.666667	-1.55102	10.6	2.54485	9.18	7.58824	2.7894	12.2127	0	0	0	50
CAMPER S.L.	Australia	32	1	18	12	6	1	0	0	0	0	4.23231	0.567562	0.721527	0.26461	0.165512	0	-1.29153	5	-4.71452	2.8	7.30812	2.7894	12.2127	0	0	0	50
CAMPER S.L.	Austria	32	1	13	10	3	1	0	0	0	0	3.23123	0.588788	0.518591	0.26461	0.0931028	0.333333	-1.55102	5.2	2.91401	1.8	6.91557	2.7894	12.2127	0	0	0	50
CAMPER S.L.	Bangladesh	32	0	2	1	1	1	0	0	0	0	3.93561	2.63734	1.3076	0.26461	0.590559	0.333333	1.27716	4.3	1.15269	5.96	8.15174	2.7894	12.2127	0	0	0	50
CAMPER S.L.	Belgium	32	1	38	15	23	1	0	0	0	0	3.13244	0.777357	0.634216	-0.25827	0.130961	0.666667	-1.29153	8.4	6.38874	1.25	7.02031	2.7894	12.2127	0	0	0	50
CAMPER S.L.	Brasil	32	1	53	24	29	1	0	0	0	0	3.89327	1.91931	0.602092	-0.25827	0.406583	0.25	-1.55102	9.3	1.70724	2.94	8.27046	2.7894	12.2127	0	0	0	50
CAMPER S.L.	Bulgaria	32	1	13	5	8	1	0	0	0	0	3.36942	1.12444	0.190378	0.26461	0.191694	0.5	-0.790003	10.1	8.1765	6.25	6.88874	2.7894	12.2127	0	0	0	50
CAMPER S.L.	Canada	32	1	23	11	12	1	0	0	0	0	3.81425	0.103029	0.79255	-0.25827	0.161496	0.166667	-1.29153	6.7	3.0366	2.9	7.50919	2.7894	12.2127	0	0	0	50
CAMPER S.L.	Chile	32	1	49	17	32	1	0	0	0	0	4.03132	1.48778	0.490568	-3.86767	0.146208	0.416667	-1.55102	8	5.60687	5.71	7.21206	2.7894	12.2127	0	0	0	50
CAMPER S.L.	China	32	1	44	28	16	1	0	0	0	0	3.98191	1.90078	1.11489	0.52605	1.8939	0.333333	1.26844	4.2	3.22686	10.2	9.11544	2.7894	12.2127	0	0	0	50
CAMPER S.L.	Colombia	32	0	33	7	26	1	0	0	0	0	3.90663	1.54759	0.748636	-3.86767	0.629637	0.166667	-1.55102	12	8.29023	4.72	7.65269	2.7894	12.2127	0	0	0	50
CAMPER S.L.	South Korea	32	1	10	9	1	1	0	0	0	0	4.00439	0.420141	0.172921	0.52605	0.19628	0.541667	-0.271032	3.7	0.900652	4.2	7.68389	2.7894	12.2127	0	0	0	50
CAMPER S.L.	Costa Rica	32	0	15	4	11	1	0	0	0	0	3.93278	1.54875	0.662422	-3.86767	0.00206424	0	-1.55102	6.6	3.26941	5.91	6.63621	2.7894	12.2127	0	0	0	50
CAMPER S.L.	Croacia	32	1	8	5	3	1	0	0	0	0	3.22565	1.27885	0.253946	0.26461	1.01215	0.666667	-1.55102	12.6	4.3578	4.28	6.64771	2.7894	12.2127	0	0	0	50
CAMPER S.L.	Denmark	32	1	10	6	4	1	0	0	0	0	3.31418	0.590138	0.733766	0.26461	0.112828	0.166667	-1.04949	4.8	2.05207	3.05	6.73368	2.7894	12.2127	0	0	0	50
CAMPER S.L.	Ecuador	32	0	18	4	14	1	0	0	0	0	3.95347	1.61213	0.825643	-3.38939	0.280888	0.133333	-1.55102	7.7	5.24269	4.74	7.12151	2.7894	12.2127	0	0	0	50
CAMPER S.L.	El Salvador	32	0	12	4	8	1	0	0	0	0	3.94102	2.12139	0.718083	-3.86767	0.459103	0.666667	-1.55102	7.2	3.05173	2.75	6.83765	2.7894	12.2127	0	0	0	50
CAMPER S.L.	Slovakia	32	0	13	9	4	1	0	0	0	0	3.29809	0.931708	0.0511288	0.26461	0.296655	0.333333	-1.29153	16.2	4.02343	6.04	6.73135	2.7894	12.2127	0	0	0	50
CAMPER S.L.	Slovenia	32	0	6	5	1	1	0	0	0	0	3.20355	0.40353	0.182051	0.26461	0.101477	0.333333	-1.29153	6.5	1.4438	4.03	6.30114	2.7894	12.2127	0	0	0	50
CAMPER S.L.	USA	32	1	74	32	42	1	0	0	0	0	3.87141	0.553655	1.26073	-0.69195	0.15745	0.166667	-1.29153	5.1	0.800894	3.2	8.47189	2.7894	12.2127	0	0	0	50
CAMPER S.L.	Estonia	32	0	3	2	1	1	0	0	0	0	3.46571	0.927963	0.110104	0.26461	0.20986	0.666667	-0.530518	7.9	20.7518	10.47	6.12908	2.7894	12.2127	0	0	0	50
CAMPER S.L.	Ethiopia	32	0	2	0	2	1	0	0	0	0	3.72911	2.78128	1.3431	0.26461	1.26883	0.333333	-0.530518	5.4	1.80247	10.2	7.85282	2.7894	12.2127	0	0	0	50
CAMPER S.L.	Philippine	32	0	12	8	4	1	0	0	0	0	4.07154	1.53391	0.995918	0.26461	0.359399	0.208333	-1.55102	7.7	1.1508	4.97	7.91936	2.7894	12.2127	0	0	0	50
CAMPER S.L.	Finland	32	1	9	5	4	1	0	0	0	0	3.48105	0.507403	0.679478	0.52605	0.114138	0.0833333	-1.04949	8.4	2.36125	2.09	6.71984	2.7894	12.2127	0	0	0	50
CAMPER S.L.	France	32	1	80	38	42	1	0	0	0	0	2.98175	0.490732	0.583416	-0.25827	0.0417816	0.333333	-1.29153	8.9	2.98952	1.19	7.78442	2.7894	12.2127	0	0	0	50
CAMPER S.L.	Greece	32	1	20	11	9	1	0	0	0	0	3.35976	0.538884	0.215795	0.26461	0.101199	0.166667	-1.04949	9.8	0.269531	3.66	7.04548	2.7894	12.2127	0	0	0	50
CAMPER S.L.	The Netherlands	32	1	23	15	8	1	0	0	0	0	3.17633	0.566689	0.663452	0.26461	0.0980731	0	-1.29153	4.7	6.98972	1.13	7.21272	2.7894	12.2127	0	0	0	50
CAMPER S.L.	Hungary	32	0	20	12	8	1	0	0	0	0	3.29217	1.2511	0.147629	0.52605	0.00651064	0	-1.29153	7.2	6.0699	4.25	7.00376	2.7894	12.2127	0	0	0	50
CAMPER S.L.	India	32	0	18	11	7	1	0	0	0	0	3.88339	2.24326	1.22135	0.26461	0.405146	0.333333	1.26844	4.4	0.818883	9.23	9.03925	2.7894	12.2127	0	0	0	50
CAMPER S.L.	Ireland	32	1	19	7	12	1	0	0	0	0	3.18256	0.764228	0.019023	0.26461	0.0741923	0.666667	-1.55102	4.3	-11.284	5.5	6.619	2.7894	12.2127	0	0	0	50
CAMPER S.L.	Iceland	32	0	2	2	0	1	0	0	0	0	3.47432	0.957051	0.692716	0.26461	0.110148	0.666667	-1.04949	2.6	14.7276	5.53	5.47239	2.7894	12.2127	0	0	0	50
CAMPER S.L.	Israel	32	1	9	4	5	1	0	0	0	0	3.54353	1.46344	0.103381	-0.21367	0.110461	0	1.01767	9	4.52632	5.17	6.84033	2.7894	12.2127	0	0	0	50
CAMPER S.L.	Italy	32	1	65	33	32	1	0	0	0	0	3.12249	0.419623	0.297329	-0.25827	0.00573603	0.25	-1.29153	7.7	1.13309	-3.56	7.76795	2.7894	12.2127	0	0	0	50
CAMPER S.L.	Japan	32	1	15	10	5	1	0	0	0	0	4.02876	0.661939	0.887715	0.52605	0.0207448	0.416667	1.26844	4.4	0.0612047	2.6	8.10644	2.7894	12.2127	0	0	0	50
CAMPER S.L.	Latvia	32	0	3	2	1	1	0	0	0	0	3.43418	0.923385	0.149979	0.26461	0.312954	0.416667	-1.03204	8.9	3.9397	10.6	6.36182	2.7894	12.2127	0	0	0	50
CAMPER S.L.	Lithuania	32	0	2	2	0	1	0	0	0	0	3.41598	0.941538	0.270507	0.26461	0.206518	0.25	-1.29153	8.3	3.93337	7.56	6.5333	2.7894	12.2127	0	0	0	50
CAMPER S.L.	Luxembourg	32	1	8	6	2	1	0	0	0	0	3.11354	1.69208	0.929135	-0.25827	0.11085	0.166667	-1.55102	4.5	10.1045	4.03	5.65964	2.7894	12.2127	0	0	0	50
CAMPER S.L.	Malta	32	0	3	2	1	1	0	0	0	0	3.20679	1.13972	0.366184	0.52605	0.130339	0.333333	-1.55102	7.3	10.5646	2.49	5.60584	2.7894	12.2127	0	0	0	50
CAMPER S.L.	Morocco	32	0	40	20	20	1	0	0	0	0	2.94765	2.40856	0.965929	0.52605	1.13327	0.166667	1.27716	11	5.6818	1.72	7.47918	2.7894	12.2127	0	0	0	50
CAMPER S.L.	Mexico	32	0	68	26	42	1	0	0	0	0	3.96116	1.61593	0.61242	-3.86767	0.803904	0.333333	-1.55102	3.5	2.35186	2.8	8.01321	2.7894	12.2127	0	0	0	50
CAMPER S.L.	Nigeria	32	0	2	1	1	1	0	0	0	0	3.5664	2.38172	1.08093	0.26461	1.74765	0.666667	-0.530518	5.6	3.50758	6.1	8.15031	2.7894	12.2127	0	0	0	50
CAMPER S.L.	Norway	32	1	10	8	2	1	0	0	0	0	3.39007	0.558513	0.773884	0.26461	0.110833	0.166667	-1.04949	4.6	1.15494	2.26	6.66495	2.7894	12.2127	0	0	0	50
CAMPER S.L.	New Zealand	32	1	2	2	0	1	0	0	0	0	4.2904	0.485975	0.553697	0.26461	0.0975475	0.666667	-0.790003	3.8	1.46672	1.9	6.61267	2.7894	12.2127	0	0	0	50
CAMPER S.L.	Panama	32	0	24	7	17	1	0	0	0	0	3.91924	1.43673	0.720964	-3.38939	0.445543	0.666667	-1.29153	9.8	4.37245	6.91	6.5094	2.7894	12.2127	0	0	0	50
CAMPER S.L.	Peru	32	0	33	8	25	1	0	0	0	0	3.97657	1.42631	0.798443	-3.38939	0.983327	0.666667	-1.55102	5.2	3.2493	6.45	7.44667	2.7894	12.2127	0	0	0	50
CAMPER S.L.	Poland	32	1	53	27	26	1	0	0	0	0	3.33558	1.19959	0.38872	0.26461	0.0799061	0.25	-1.29153	17.7	2.54782	3.55	7.58167	2.7894	12.2127	0	0	0	50
CAMPER S.L.	Portugal	32	1	102	38	64	1	0	0	0	0	2.8324	0.769779	0.315828	-0.25827	0.0980653	0.166667	-1.29153	7.6	1.69826	0.37	7.02323	2.7894	12.2127	0	0	0	50
CAMPER S.L.	UK	32	1	68	27	41	1	0	0	0	0	3.15698	0.805554	0.679132	0.26461	0.00306242	0.5	-0.790003	4.7	7.47323	1.82	7.77979	2.7894	12.2127	0	0	0	50
CAMPER S.L.	Czech Republic	32	1	28	18	10	1	0	0	0	0	3.26204	0.685613	0.00167352	0.26461	0.00949857	0.666667	-1.03204	7.9	8.86508	6.08	7.01005	2.7894	12.2127	0	0	0	50
CAMPER S.L.	Romania	32	1	20	9	11	1	0	0	0	0	3.37913	1.01845	0.52496	-0.25827	0.348609	0.5	-0.790003	7.2	6.46266	4.1	7.33514	2.7894	12.2127	0	0	0	50
CAMPER S.L.	Rusia	32	1	24	16	8	1	0	0	0	0	3.62123	0.696054	0.111071	0.26461	0.792843	0.666667	-0.790003	7.1	1.90974	6.4	8.15568	2.7894	12.2127	0	0	0	50
CAMPER S.L.	Serbia	32	1	7	4	3	1	0	0	0	0	3.30011	1.33787	0.652569	0.26461	1.71416	0.333333	-0.790003	20.8	5.64939	4.68	6.90656	2.7894	12.2127	0	0	0	50
CAMPER S.L.	Singapur	32	1	13	10	3	1	0	0	0	0	4.05448	1.4349	0.479333	0.26461	1.00484	0.666667	1.00895	4.1	17.2101	6.62	6.63767	2.7894	12.2127	0	0	0	50
CAMPER S.L.	South Africa	32	1	14	6	8	1	0	0	0	0	3.91822	1.72008	0.6954	0.26461	0.167296	0	-0.790003	23.8	2.63118	5.1	7.67106	2.7894	12.2127	0	0	0	50
CAMPER S.L.	Sweden	32	0	15	9	6	1	0	0	0	0	3.3956	0.90496	0.81257	0.26461	0.108496	0	-0.790003	7.7	3.74326	2.7	6.9554	2.7894	12.2127	0	0	0	50
CAMPER S.L.	Switzerland	32	1	18	8	10	1	0	0	0	0	3.91415	0.836495	0.694867	-0.21367	0.150978	0.166667	-1.55102	4.4	1.57889	1.9	6.8714	2.7894	12.2127	0	0	0	50
CAMPER S.L.	Thailand	32	1	14	10	4	1	0	0	0	0	4.00637	1.44759	1.08846	0.52605	0.353899	0.666667	1.26844	1.3	2.09225	4.49	7.80776	2.7894	12.2127	0	0	0	50
CAMPER S.L.	Turquia	32	1	18	13	5	1	0	0	0	0	3.47222	1.60088	0.7561	0.52605	0.628774	0.666667	1.27716	10.6	2.66423	7.38	7.85772	2.7894	12.2127	0	0	0	50
CAMPER S.L.	Uruguay	32	0	23	7	16	1	0	0	0	0	3.99607	1.1487	0.233146	-3.86767	0.14597	0.666667	-1.29153	12.2	3.61146	6.56	6.51927	2.7894	12.2127	0	0	0	50
CAMPER S.L.	Venezuela	32	0	31	11	20	1	0	0	0	0	3.8557	1.76796	0.336214	-3.86767	0.309872	0.166667	-1.55102	11.4	2.04181	10.33	7.42451	2.7894	12.2127	0	0	0	50
CAMPOFRIO ALIMENTACION SA	Germany	33	0	56	6	50	0	1	0	0	0	3.21148	0.536164	0.562607	0.26461	0.0541978	0.666667	-1.29153	11.1	1.16865	0.96	7.91629	3.89301	11.1181	1	1	0	3
CAMPOFRIO ALIMENTACION SA	Argentina	33	0	61	3	58	0	1	0	0	0	4.00345	1.28036	0.249754	-3.86767	0.279269	0.666667	-1.55102	10.6	2.54485	9.18	7.58824	3.89301	11.1181	1	1	0	3
CAMPOFRIO ALIMENTACION SA	Australia	33	0	18	2	16	0	1	0	0	0	4.23231	0.567562	0.721527	0.26461	0.165512	0	-1.29153	5	-4.71452	2.8	7.30812	3.89301	11.1181	1	1	0	3
CAMPOFRIO ALIMENTACION SA	Austria	33	0	13	0	13	0	1	0	0	0	3.23123	0.588788	0.518591	0.26461	0.0931028	0.333333	-1.55102	5.2	2.91401	1.8	6.91557	3.89301	11.1181	1	1	0	3
CAMPOFRIO ALIMENTACION SA	Bangladesh	33	0	2	0	2	0	1	0	0	0	3.93561	2.63734	1.3076	0.26461	0.590559	0.333333	1.27716	4.3	1.15269	5.96	8.15174	3.89301	11.1181	1	1	0	3
CAMPOFRIO ALIMENTACION SA	Belgium	33	0	38	2	36	0	1	0	0	0	3.13244	0.777357	0.634216	-0.25827	0.130961	0.666667	-1.29153	8.4	6.38874	1.25	7.02031	3.89301	11.1181	1	1	0	3
CAMPOFRIO ALIMENTACION SA	Brasil	33	0	53	3	50	0	1	0	0	0	3.89327	1.91931	0.602092	-0.25827	0.406583	0.25	-1.55102	9.3	1.70724	2.94	8.27046	3.89301	11.1181	1	1	0	3
CAMPOFRIO ALIMENTACION SA	Bulgaria	33	0	13	0	13	0	1	0	0	0	3.36942	1.12444	0.190378	0.26461	0.191694	0.5	-0.790003	10.1	8.1765	6.25	6.88874	3.89301	11.1181	1	1	0	3
CAMPOFRIO ALIMENTACION SA	Canada	33	0	23	3	20	0	1	0	0	0	3.81425	0.103029	0.79255	-0.25827	0.161496	0.166667	-1.29153	6.7	3.0366	2.9	7.50919	3.89301	11.1181	1	1	0	3
CAMPOFRIO ALIMENTACION SA	Chile	33	0	49	2	47	0	1	0	0	0	4.03132	1.48778	0.490568	-3.86767	0.146208	0.416667	-1.55102	8	5.60687	5.71	7.21206	3.89301	11.1181	1	1	0	3
CAMPOFRIO ALIMENTACION SA	China	33	0	44	3	41	0	1	0	0	0	3.98191	1.90078	1.11489	0.52605	1.8939	0.333333	1.26844	4.2	3.22686	10.2	9.11544	3.89301	11.1181	1	1	0	3
CAMPOFRIO ALIMENTACION SA	Colombia	33	0	33	0	33	0	1	0	0	0	3.90663	1.54759	0.748636	-3.86767	0.629637	0.166667	-1.55102	12	8.29023	4.72	7.65269	3.89301	11.1181	1	1	0	3
CAMPOFRIO ALIMENTACION SA	South Korea	33	0	10	1	9	0	1	0	0	0	4.00439	0.420141	0.172921	0.52605	0.19628	0.541667	-0.271032	3.7	0.900652	4.2	7.68389	3.89301	11.1181	1	1	0	3
CAMPOFRIO ALIMENTACION SA	Costa Rica	33	0	15	1	14	0	1	0	0	0	3.93278	1.54875	0.662422	-3.86767	0.00206424	0	-1.55102	6.6	3.26941	5.91	6.63621	3.89301	11.1181	1	1	0	3
CAMPOFRIO ALIMENTACION SA	Croacia	33	0	8	0	8	0	1	0	0	0	3.22565	1.27885	0.253946	0.26461	1.01215	0.666667	-1.55102	12.6	4.3578	4.28	6.64771	3.89301	11.1181	1	1	0	3
CAMPOFRIO ALIMENTACION SA	Denmark	33	0	10	1	9	0	1	0	0	0	3.31418	0.590138	0.733766	0.26461	0.112828	0.166667	-1.04949	4.8	2.05207	3.05	6.73368	3.89301	11.1181	1	1	0	3
CAMPOFRIO ALIMENTACION SA	Ecuador	33	0	18	1	17	0	1	0	0	0	3.95347	1.61213	0.825643	-3.38939	0.280888	0.133333	-1.55102	7.7	5.24269	4.74	7.12151	3.89301	11.1181	1	1	0	3
CAMPOFRIO ALIMENTACION SA	El Salvador	33	0	12	1	11	0	1	0	0	0	3.94102	2.12139	0.718083	-3.86767	0.459103	0.666667	-1.55102	7.2	3.05173	2.75	6.83765	3.89301	11.1181	1	1	0	3
CAMPOFRIO ALIMENTACION SA	Slovakia	33	0	13	0	13	0	1	0	0	0	3.29809	0.931708	0.0511288	0.26461	0.296655	0.333333	-1.29153	16.2	4.02343	6.04	6.73135	3.89301	11.1181	1	1	0	3
CAMPOFRIO ALIMENTACION SA	Slovenia	33	0	6	0	6	0	1	0	0	0	3.20355	0.40353	0.182051	0.26461	0.101477	0.333333	-1.29153	6.5	1.4438	4.03	6.30114	3.89301	11.1181	1	1	0	3
CAMPOFRIO ALIMENTACION SA	USA	33	0	74	11	63	0	1	0	0	0	3.87141	0.553655	1.26073	-0.69195	0.15745	0.166667	-1.29153	5.1	0.800894	3.2	8.47189	3.89301	11.1181	1	1	0	3
CAMPOFRIO ALIMENTACION SA	Estonia	33	0	3	0	3	0	1	0	0	0	3.46571	0.927963	0.110104	0.26461	0.20986	0.666667	-0.530518	7.9	20.7518	10.47	6.12908	3.89301	11.1181	1	1	0	3
CAMPOFRIO ALIMENTACION SA	Ethiopia	33	0	2	0	2	0	1	0	0	0	3.72911	2.78128	1.3431	0.26461	1.26883	0.333333	-0.530518	5.4	1.80247	10.2	7.85282	3.89301	11.1181	1	1	0	3
CAMPOFRIO ALIMENTACION SA	Philippine	33	0	12	0	12	0	1	0	0	0	4.07154	1.53391	0.995918	0.26461	0.359399	0.208333	-1.55102	7.7	1.1508	4.97	7.91936	3.89301	11.1181	1	1	0	3
CAMPOFRIO ALIMENTACION SA	Finland	33	0	9	1	8	0	1	0	0	0	3.48105	0.507403	0.679478	0.52605	0.114138	0.0833333	-1.04949	8.4	2.36125	2.09	6.71984	3.89301	11.1181	1	1	0	3
CAMPOFRIO ALIMENTACION SA	France	33	0	80	8	72	0	1	0	0	0	2.98175	0.490732	0.583416	-0.25827	0.0417816	0.333333	-1.29153	8.9	2.98952	1.19	7.78442	3.89301	11.1181	1	1	0	3
CAMPOFRIO ALIMENTACION SA	Greece	33	0	20	2	18	0	1	0	0	0	3.35976	0.538884	0.215795	0.26461	0.101199	0.166667	-1.04949	9.8	0.269531	3.66	7.04548	3.89301	11.1181	1	1	0	3
CAMPOFRIO ALIMENTACION SA	The Netherlands	33	0	23	2	21	0	1	0	0	0	3.17633	0.566689	0.663452	0.26461	0.0980731	0	-1.29153	4.7	6.98972	1.13	7.21272	3.89301	11.1181	1	1	0	3
CAMPOFRIO ALIMENTACION SA	Hungary	33	0	20	1	19	0	1	0	0	0	3.29217	1.2511	0.147629	0.52605	0.00651064	0	-1.29153	7.2	6.0699	4.25	7.00376	3.89301	11.1181	1	1	0	3
CAMPOFRIO ALIMENTACION SA	India	33	0	18	0	18	0	1	0	0	0	3.88339	2.24326	1.22135	0.26461	0.405146	0.333333	1.26844	4.4	0.818883	9.23	9.03925	3.89301	11.1181	1	1	0	3
CAMPOFRIO ALIMENTACION SA	Ireland	33	0	19	2	17	0	1	0	0	0	3.18256	0.764228	0.019023	0.26461	0.0741923	0.666667	-1.55102	4.3	-11.284	5.5	6.619	3.89301	11.1181	1	1	0	3
CAMPOFRIO ALIMENTACION SA	Iceland	33	0	2	0	2	0	1	0	0	0	3.47432	0.957051	0.692716	0.26461	0.110148	0.666667	-1.04949	2.6	14.7276	5.53	5.47239	3.89301	11.1181	1	1	0	3
CAMPOFRIO ALIMENTACION SA	Israel	33	0	9	1	8	0	1	0	0	0	3.54353	1.46344	0.103381	-0.21367	0.110461	0	1.01767	9	4.52632	5.17	6.84033	3.89301	11.1181	1	1	0	3
CAMPOFRIO ALIMENTACION SA	Italy	33	0	65	4	61	0	1	0	0	0	3.12249	0.419623	0.297329	-0.25827	0.00573603	0.25	-1.29153	7.7	1.13309	-3.56	7.76795	3.89301	11.1181	1	1	0	3
CAMPOFRIO ALIMENTACION SA	Japan	33	0	15	2	13	0	1	0	0	0	4.02876	0.661939	0.887715	0.52605	0.0207448	0.416667	1.26844	4.4	0.0612047	2.6	8.10644	3.89301	11.1181	1	1	0	3
CAMPOFRIO ALIMENTACION SA	Latvia	33	0	3	0	3	0	1	0	0	0	3.43418	0.923385	0.149979	0.26461	0.312954	0.416667	-1.03204	8.9	3.9397	10.6	6.36182	3.89301	11.1181	1	1	0	3
CAMPOFRIO ALIMENTACION SA	Lithuania	33	0	2	0	2	0	1	0	0	0	3.41598	0.941538	0.270507	0.26461	0.206518	0.25	-1.29153	8.3	3.93337	7.56	6.5333	3.89301	11.1181	1	1	0	3
CAMPOFRIO ALIMENTACION SA	Luxembourg	33	0	8	0	8	0	1	0	0	0	3.11354	1.69208	0.929135	-0.25827	0.11085	0.166667	-1.55102	4.5	10.1045	4.03	5.65964	3.89301	11.1181	1	1	0	3
CAMPOFRIO ALIMENTACION SA	Malta	33	0	3	0	3	0	1	0	0	0	3.20679	1.13972	0.366184	0.52605	0.130339	0.333333	-1.55102	7.3	10.5646	2.49	5.60584	3.89301	11.1181	1	1	0	3
CAMPOFRIO ALIMENTACION SA	Morocco	33	0	40	2	38	0	1	0	0	0	2.94765	2.40856	0.965929	0.52605	1.13327	0.166667	1.27716	11	5.6818	1.72	7.47918	3.89301	11.1181	1	1	0	3
CAMPOFRIO ALIMENTACION SA	Mexico	33	0	68	6	62	0	1	0	0	0	3.96116	1.61593	0.61242	-3.86767	0.803904	0.333333	-1.55102	3.5	2.35186	2.8	8.01321	3.89301	11.1181	1	1	0	3
CAMPOFRIO ALIMENTACION SA	Nigeria	33	0	2	0	2	0	1	0	0	0	3.5664	2.38172	1.08093	0.26461	1.74765	0.666667	-0.530518	5.6	3.50758	6.1	8.15031	3.89301	11.1181	1	1	0	3
CAMPOFRIO ALIMENTACION SA	Norway	33	0	10	0	10	0	1	0	0	0	3.39007	0.558513	0.773884	0.26461	0.110833	0.166667	-1.04949	4.6	1.15494	2.26	6.66495	3.89301	11.1181	1	1	0	3
CAMPOFRIO ALIMENTACION SA	New Zealand	33	0	2	0	2	0	1	0	0	0	4.2904	0.485975	0.553697	0.26461	0.0975475	0.666667	-0.790003	3.8	1.46672	1.9	6.61267	3.89301	11.1181	1	1	0	3
CAMPOFRIO ALIMENTACION SA	Panama	33	0	24	0	24	0	1	0	0	0	3.91924	1.43673	0.720964	-3.38939	0.445543	0.666667	-1.29153	9.8	4.37245	6.91	6.5094	3.89301	11.1181	1	1	0	3
CAMPOFRIO ALIMENTACION SA	Peru	33	0	33	2	31	0	1	0	0	0	3.97657	1.42631	0.798443	-3.38939	0.983327	0.666667	-1.55102	5.2	3.2493	6.45	7.44667	3.89301	11.1181	1	1	0	3
CAMPOFRIO ALIMENTACION SA	Poland	33	0	53	6	47	0	1	0	0	0	3.33558	1.19959	0.38872	0.26461	0.0799061	0.25	-1.29153	17.7	2.54782	3.55	7.58167	3.89301	11.1181	1	1	0	3
[truncated: 8,005 more rows]
